# Supplementary material for: Identification and characterization of cichlid TAAR genes and comparison with other teleost TAAR repertoires
Source: PubMed Central journal article supplement (PMC4415300; doi:10.1186/s12864-015-1478-4), 2015-04-23
Supplement: 12864_2015_1478_MOESM8_ESM.pdf [file 12864_2015_1478_MOESM8_ESM.pdf]

| Fam A                     |                           |       |       |       |
|---------------------------|---------------------------|-------|-------|-------|
|                           |                           | dN    | dS    | dN/dS |
| contig061091-BurTARs.A014 | contig066691-ZebTARs.A015 | 0.003 | 0.023 | 0.122 |
| contig055697-BurTARs.A022 | contig053139-ZebTARs.A023 | 0.001 | 0.012 | 0.122 |
| contig022390-TiITARs.A055 | contig030445-ZebTARs.A026 | 0.016 | 0.083 | 0.190 |
| contig035381-NyeTARs.A015 | contig022390-TiITARs.A055 | 0.016 | 0.083 | 0.190 |
| contig041024-BurTARs.A026 | contig022320-TiITARs.A059 | 0.014 | 0.074 | 0.191 |
| contig049540-BurTARs.A024 | contig056200-NyeTARs.A029 | 0.001 | 0.007 | 0.192 |
| contig045302-BurTAR.A001  | contig040586-ZebTAR.A001  | 0.004 | 0.022 | 0.197 |
| contig084880-BriTARs.A016 | contig045999-NyeTARs.A026 | 0.008 | 0.042 | 0.201 |
| contig007512-TiITARs.A024 | contig066330-ZebTARs.A027 | 0.087 | 0.421 | 0.206 |
| contig055697-BurTARs.A022 | contig053145-ZebTARs.A028 | 0.081 | 0.386 | 0.208 |
| contig007512-TiITARs.A024 | contig053145-ZebTARs.A028 | 0.084 | 0.401 | 0.208 |
| contig055697-BurTARs.A022 | contig066330-ZebTARs.A027 | 0.085 | 0.406 | 0.210 |
| contig057148-BurTARs.A028 | contig046010-NyeTARs.A019 | 0.006 | 0.027 | 0.212 |
| contig055697-BurTARs.A022 | contig065494-BurTARs.A030 | 0.085 | 0.400 | 0.213 |
| contig086337-BriTARs.A019 | contig053145-ZebTARs.A028 | 0.082 | 0.381 | 0.214 |
| contig065494-BurTARs.A030 | contig007512-TiITARs.A024 | 0.089 | 0.416 | 0.215 |
| contig086337-BriTARs.A019 | contig065494-BurTARs.A030 | 0.085 | 0.394 | 0.215 |
| contig055697-BurTARs.A022 | contig059766-BurTARs.A029 | 0.082 | 0.381 | 0.216 |
| contig086337-BriTARs.A019 | contig059766-BurTARs.A029 | 0.082 | 0.375 | 0.218 |
| contig007512-TiITARs.A024 | contig056134-TiITARs.A058 | 0.094 | 0.432 | 0.218 |
| contig046014-NyeTARs.A024 | contig022320-TiITARs.A059 | 0.013 | 0.058 | 0.219 |
| contig053139-ZebTARs.A023 | contig053145-ZebTARs.A028 | 0.080 | 0.366 | 0.219 |
| contig055697-BurTARs.A022 | contig056134-TiITARs.A058 | 0.098 | 0.444 | 0.220 |
| contig086337-BriTARs.A019 | contig066330-ZebTARs.A027 | 0.089 | 0.404 | 0.221 |
| contig059766-BurTARs.A029 | contig007512-TiITARs.A024 | 0.088 | 0.396 | 0.221 |
| contig084880-BriTARs.A016 | contig056023-BurTARs.A019 | 0.008 | 0.038 | 0.222 |
| contig056134-TiITARs.A058 | contig053139-ZebTARs.A023 | 0.097 | 0.435 | 0.223 |
| contig065494-BurTARs.A030 | contig053139-ZebTARs.A023 | 0.085 | 0.379 | 0.224 |
| contig053139-ZebTARs.A023 | contig066330-ZebTARs.A027 | 0.088 | 0.389 | 0.226 |
| contig059766-BurTARs.A029 | contig053139-ZebTARs.A023 | 0.082 | 0.361 | 0.227 |
| contig039639-TiITAR.A001  | contig059768-ZebTARs.A022 | 0.361 | 1.584 | 0.228 |
| contig086337-BriTARs.A019 | contig056134-TiITARs.A058 | 0.097 | 0.425 | 0.228 |
| contig049540-BurTARs.A024 | contig062677-ZebTARs.A018 | 0.004 | 0.018 | 0.229 |
| contig054630-BurTARs.A023 | contig039639-TiITAR.A001  | 0.366 | 1.590 | 0.230 |
| contig039640-TiITAR.A003  | contig059768-ZebTARs.A022 | 0.342 | 1.470 | 0.233 |
| contig054630-BurTARs.A023 | contig039640-TiITAR.A003  | 0.346 | 1.475 | 0.235 |
| contig025313-BriTAR.A002  | contig023443-TiITAR.A005  | 0.010 | 0.042 | 0.236 |
| contig025313-BriTAR.A002  | contig022334-TiITARs.A030 | 0.334 | 1.409 | 0.237 |
| contig025313-BriTAR.A002  | contig059768-ZebTARs.A022 | 0.284 | 1.187 | 0.240 |
| contig023443-TiITAR.A005  | contig022334-TiITARs.A030 | 0.320 | 1.318 | 0.243 |
| contig025313-BriTAR.A002  | contig062039-NyeTARs.A022 | 0.279 | 1.143 | 0.244 |
| contig032272-NyeTAR.A004  | contig059768-ZebTARs.A022 | 0.289 | 1.186 | 0.244 |
| contig022334-TiITARs.A030 | contig003909-ZebTAR.A003  | 0.338 | 1.387 | 0.244 |
| contig032272-NyeTAR.A004  | contig022334-TiITARs.A030 | 0.343 | 1.389 | 0.247 |
| contig003909-ZebTAR.A003  | contig059768-ZebTARs.A022 | 0.289 | 1.169 | 0.247 |
| contig025313-BriTAR.A002  | contig054630-BurTARs.A023 | 0.286 | 1.152 | 0.249 |
| contig040586-ZebTAR.A002  | contig059768-ZebTARs.A022 | 0.376 | 1.503 | 0.250 |
| contig059673-BurTARs.A016 | contig007520-TiITARs.A025 | 0.029 | 0.116 | 0.251 |
| contig065494-BurTARs.A030 | contig066330-ZebTARs.A027 | 0.003 | 0.011 | 0.252 |
| contig054630-BurTARs.A023 | contig040586-ZebTAR.A002  | 0.380 | 1.508 | 0.252 |
| contig020038-BurTAR.A002  | contig059768-ZebTARs.A022 | 0.291 | 1.154 | 0.252 |

|                           |                           |       |       |       |
|---------------------------|---------------------------|-------|-------|-------|
| contig020038-BurTARs.A002 | contig022334-TiITARs.A030 | 0.345 | 1.366 | 0.253 |
| contig054630-BurTARs.A023 | contig032272-NyeTARs.A004 | 0.291 | 1.151 | 0.253 |
| contig039642-TiITARs.A004 | contig059768-ZebTARs.A022 | 0.364 | 1.437 | 0.253 |
| contig057145-BurTARs.A018 | contig023443-TiITARs.A005 | 0.343 | 1.349 | 0.254 |
| contig062039-NyeTARs.A022 | contig023443-TiITARs.A005 | 0.286 | 1.120 | 0.255 |
| contig056200-NyeTARs.A029 | contig062677-ZebTARs.A018 | 0.003 | 0.011 | 0.255 |
| contig062039-NyeTARs.A022 | contig003909-ZebTARs.A003 | 0.288 | 1.125 | 0.256 |
| contig054630-BurTARs.A023 | contig039642-TiITARs.A004 | 0.369 | 1.437 | 0.257 |
| contig054630-BurTARs.A023 | contig003909-ZebTARs.A003 | 0.291 | 1.135 | 0.257 |
| contig039640-TiITARs.A002 | contig059768-ZebTARs.A022 | 0.369 | 1.435 | 0.257 |
| contig054630-BurTARs.A023 | contig039640-TiITARs.A002 | 0.373 | 1.439 | 0.259 |
| contig032272-NyeTARs.A004 | contig062039-NyeTARs.A022 | 0.289 | 1.113 | 0.260 |
| contig020038-BurTARs.A002 | contig062039-NyeTARs.A022 | 0.291 | 1.116 | 0.261 |
| contig041024-BurTARs.A026 | contig046014-NyeTARs.A024 | 0.010 | 0.038 | 0.261 |
| contig039639-TiITARs.A001 | contig022354-TiITARs.A038 | 0.421 | 1.612 | 0.261 |
| contig029633-BriTARs.A003 | contig059768-ZebTARs.A022 | 0.391 | 1.495 | 0.262 |
| contig020038-BurTARs.A002 | contig054630-BurTARs.A023 | 0.293 | 1.121 | 0.262 |
| contig039640-TiITARs.A003 | contig023443-TiITARs.A005 | 0.301 | 1.147 | 0.262 |
| contig025313-BriTARs.A002 | contig057145-BurTARs.A018 | 0.359 | 1.368 | 0.263 |
| contig057145-BurTARs.A018 | contig039640-TiITARs.A003 | 0.404 | 1.536 | 0.263 |
| contig029633-BriTARs.A003 | contig054630-BurTARs.A023 | 0.395 | 1.499 | 0.264 |
| contig023443-TiITARs.A005 | contig059768-ZebTARs.A022 | 0.292 | 1.106 | 0.264 |
| contig045302-BurTARs.A001 | contig059768-ZebTARs.A022 | 0.357 | 1.350 | 0.264 |
| contig061977-BurTARs.A012 | contig061410-ZebTARs.A021 | 0.003 | 0.011 | 0.265 |
| contig039640-TiITARs.A003 | contig003909-ZebTARs.A003 | 0.292 | 1.094 | 0.267 |
| contig025313-BriTARs.A002 | contig039640-TiITARs.A003 | 0.298 | 1.119 | 0.267 |
| contig041024-BurTARs.A026 | contig023443-TiITARs.A005 | 0.343 | 1.285 | 0.267 |
| contig045302-BurTARs.A001 | contig054630-BurTARs.A023 | 0.361 | 1.350 | 0.268 |
| contig084886-BriTARs.A017 | contig039639-TiITARs.A001 | 0.422 | 1.573 | 0.268 |
| contig056020-BurTARs.A021 | contig022355-TiITARs.A039 | 0.020 | 0.076 | 0.269 |
| contig055697-BurTARs.A022 | contig059768-ZebTARs.A022 | 0.292 | 1.087 | 0.269 |
| contig054630-BurTARs.A023 | contig023443-TiITARs.A005 | 0.294 | 1.090 | 0.270 |
| contig046014-NyeTARs.A024 | contig023443-TiITARs.A005 | 0.351 | 1.302 | 0.270 |
| contig039642-TiITARs.A004 | contig023443-TiITARs.A005 | 0.314 | 1.164 | 0.270 |
| contig057145-BurTARs.A018 | contig032272-NyeTARs.A004 | 0.367 | 1.360 | 0.270 |
| contig025313-BriTARs.A002 | contig022378-TiITARs.A051 | 0.294 | 1.086 | 0.271 |
| contig035381-NyeTARs.A015 | contig023443-TiITARs.A005 | 0.299 | 1.106 | 0.271 |
| contig039640-TiITARs.A002 | contig023443-TiITARs.A005 | 0.325 | 1.200 | 0.271 |
| contig039639-TiITARs.A001 | contig023443-TiITARs.A005 | 0.317 | 1.165 | 0.272 |
| contig059768-ZebTARs.A022 | contig053145-ZebTARs.A028 | 0.288 | 1.057 | 0.272 |
| contig023443-TiITARs.A005 | contig022378-TiITARs.A051 | 0.291 | 1.067 | 0.272 |
| contig059766-BurTARs.A029 | contig059768-ZebTARs.A022 | 0.292 | 1.072 | 0.273 |
| contig038663-NyeTARs.A005 | contig059768-ZebTARs.A022 | 0.364 | 1.332 | 0.273 |
| contig055697-BurTARs.A022 | contig054630-BurTARs.A023 | 0.297 | 1.087 | 0.273 |
| contig066056-ZebTARs.A017 | contig053139-ZebTARs.A023 | 0.254 | 0.930 | 0.273 |
| contig059768-ZebTARs.A022 | contig053139-ZebTARs.A023 | 0.297 | 1.086 | 0.273 |
| contig023443-TiITARs.A005 | contig030445-ZebTARs.A026 | 0.295 | 1.078 | 0.273 |
| contig046010-NyeTARs.A019 | contig022357-TiITARs.A041 | 0.103 | 0.377 | 0.274 |
| contig020038-BurTARs.A002 | contig039640-TiITARs.A003 | 0.300 | 1.096 | 0.274 |
| contig082565-BriTARs.A022 | contig023443-TiITARs.A005 | 0.298 | 1.087 | 0.274 |
| contig057145-BurTARs.A018 | contig039639-TiITARs.A001 | 0.411 | 1.500 | 0.274 |
| contig057145-BurTARs.A018 | contig003909-ZebTARs.A003 | 0.372 | 1.358 | 0.274 |
| contig057148-BurTARs.A028 | contig022357-TiITARs.A041 | 0.106 | 0.388 | 0.274 |

|                           |                           |       |       |       |
|---------------------------|---------------------------|-------|-------|-------|
| contig040586-ZebTAR.A001  | contig059768-ZebTARs.A022 | 0.358 | 1.303 | 0.274 |
| contig025313-BriTAR.A002  | contig039642-TiITAR.A004  | 0.312 | 1.135 | 0.275 |
| contig057148-BurTARs.A028 | contig039639-TiITAR.A001  | 0.427 | 1.554 | 0.275 |
| contig023443-TiITAR.A005  | contig003909-ZebTAR.A003  | 0.017 | 0.062 | 0.275 |
| contig086337-BriTARs.A019 | contig066056-ZebTARs.A017 | 0.257 | 0.933 | 0.275 |
| contig025313-BriTAR.A002  | contig039640-TiITAR.A002  | 0.323 | 1.170 | 0.276 |
| contig060707-BurTARs.A015 | contig060105-NyeTARs.A018 | 0.004 | 0.015 | 0.276 |
| contig054630-BurTARs.A023 | contig038663-NyeTAR.A005  | 0.368 | 1.332 | 0.276 |
| contig025313-BriTAR.A002  | contig039639-TiITAR.A001  | 0.314 | 1.136 | 0.276 |
| contig020038-BurTAR.A002  | contig057145-BurTARs.A018 | 0.372 | 1.343 | 0.277 |
| contig054630-BurTARs.A023 | contig053139-ZebTARs.A023 | 0.301 | 1.086 | 0.277 |
| contig007512-TiITARs.A024 | contig059768-ZebTARs.A022 | 0.294 | 1.061 | 0.278 |
| contig025313-BriTAR.A002  | contig040586-ZebTAR.A001  | 0.315 | 1.134 | 0.278 |
| contig054630-BurTARs.A023 | contig040586-ZebTAR.A001  | 0.362 | 1.303 | 0.278 |
| contig054630-BurTARs.A023 | contig053145-ZebTARs.A028 | 0.294 | 1.057 | 0.278 |
| contig054630-BurTARs.A023 | contig059766-BurTARs.A029 | 0.299 | 1.072 | 0.278 |
| contig039642-TiITAR.A004  | contig003909-ZebTAR.A003  | 0.309 | 1.109 | 0.279 |
| contig025313-BriTAR.A002  | contig022341-TiITARs.A032 | 0.361 | 1.293 | 0.279 |
| contig035376-NyeTARs.A014 | contig023443-TiITAR.A005  | 0.304 | 1.090 | 0.279 |
| contig032272-NyeTAR.A004  | contig039640-TiITAR.A003  | 0.299 | 1.070 | 0.280 |
| contig086337-BriTARs.A019 | contig059768-ZebTARs.A022 | 0.299 | 1.071 | 0.280 |
| contig039639-TiITAR.A001  | contig030464-ZebTARs.A025 | 0.439 | 1.571 | 0.280 |
| contig039640-TiITAR.A002  | contig003909-ZebTAR.A003  | 0.320 | 1.144 | 0.280 |
| contig022343-TiITARs.A033 | contig022390-TiITARs.A055 | 0.183 | 0.652 | 0.280 |
| contig061977-BurTARs.A012 | contig023443-TiITAR.A005  | 0.286 | 1.019 | 0.280 |
| contig046013-NyeTARs.A021 | contig066691-ZebTARs.A015 | 0.014 | 0.050 | 0.280 |
| contig039639-TiITAR.A001  | contig003909-ZebTAR.A003  | 0.312 | 1.111 | 0.281 |
| contig061091-BurTARs.A014 | contig046013-NyeTARs.A021 | 0.014 | 0.050 | 0.281 |
| contig055697-BurTARs.A022 | contig066056-ZebTARs.A017 | 0.254 | 0.905 | 0.281 |
| contig040586-ZebTAR.A001  | contig003909-ZebTAR.A003  | 0.313 | 1.116 | 0.281 |
| contig066330-ZebTARs.A027 | contig053145-ZebTARs.A028 | 0.009 | 0.031 | 0.281 |
| contig057145-BurTARs.A018 | contig040586-ZebTAR.A002  | 0.416 | 1.478 | 0.281 |
| contig020038-BurTAR.A002  | contig039642-TiITAR.A004  | 0.313 | 1.112 | 0.282 |
| contig025313-BriTAR.A002  | contig061417-ZebTARs.A020 | 0.361 | 1.280 | 0.282 |
| contig059673-BurTARs.A016 | contig007524-TiITARs.A026 | 0.015 | 0.052 | 0.282 |
| contig039640-TiITAR.A002  | contig022354-TiITARs.A038 | 0.412 | 1.459 | 0.282 |
| contig025313-BriTAR.A002  | contig038663-NyeTAR.A005  | 0.319 | 1.132 | 0.282 |
| contig020038-BurTAR.A002  | contig039640-TiITAR.A002  | 0.324 | 1.146 | 0.283 |
| contig046013-NyeTARs.A021 | contig022353-TiITARs.A036 | 0.045 | 0.159 | 0.283 |
| contig023443-TiITAR.A005  | contig040586-ZebTAR.A002  | 0.317 | 1.117 | 0.284 |
| contig035377-NyeTARs.A023 | contig023443-TiITAR.A005  | 0.323 | 1.140 | 0.284 |
| contig020038-BurTAR.A002  | contig039639-TiITAR.A001  | 0.316 | 1.113 | 0.284 |
| contig039640-TiITAR.A003  | contig022354-TiITARs.A038 | 0.404 | 1.425 | 0.284 |
| contig020038-BurTAR.A002  | contig040586-ZebTAR.A001  | 0.318 | 1.119 | 0.284 |
| contig084886-BriTARs.A017 | contig039640-TiITAR.A002  | 0.412 | 1.452 | 0.284 |
| contig025313-BriTAR.A002  | contig035377-NyeTARs.A023 | 0.333 | 1.170 | 0.284 |
| contig046010-NyeTARs.A019 | contig039639-TiITAR.A001  | 0.431 | 1.515 | 0.284 |
| contig022354-TiITARs.A038 | contig040586-ZebTAR.A002  | 0.428 | 1.504 | 0.284 |
| contig022378-TiITARs.A051 | contig003909-ZebTAR.A003  | 0.301 | 1.056 | 0.285 |
| contig054630-BurTARs.A023 | contig030445-ZebTARs.A026 | 0.322 | 1.128 | 0.285 |
| contig086337-BriTARs.A019 | contig054630-BurTARs.A023 | 0.306 | 1.071 | 0.286 |
| contig022357-TiITARs.A041 | contig030464-ZebTARs.A025 | 0.108 | 0.379 | 0.286 |
| contig054630-BurTARs.A023 | contig035381-NyeTARs.A015 | 0.318 | 1.109 | 0.287 |

|                           |                           |       |       |       |
|---------------------------|---------------------------|-------|-------|-------|
| contig057145-BurTARs.A018 | contig039642-TiITAR.A004  | 0.408 | 1.421 | 0.287 |
| contig061977-BurTARs.A012 | contig022379-TiITARs.A052 | 0.017 | 0.058 | 0.287 |
| contig032272-NyeTAR.A004  | contig040586-ZebTAR.A001  | 0.316 | 1.099 | 0.287 |
| contig062039-NyeTARs.A022 | contig039640-TiITAR.A003  | 0.339 | 1.181 | 0.287 |
| contig025313-BriTAR.A002  | contig035381-NyeTARs.A015 | 0.317 | 1.102 | 0.288 |
| contig054630-BurTARs.A023 | contig035376-NyeTARs.A014 | 0.331 | 1.149 | 0.288 |
| contig020038-BurTAR.A002  | contig038663-NyeTAR.A005  | 0.322 | 1.117 | 0.288 |
| contig025313-BriTAR.A002  | contig040586-ZebTAR.A002  | 0.314 | 1.090 | 0.288 |
| contig022337-TiITARs.A031 | contig022343-TiITARs.A033 | 0.028 | 0.096 | 0.289 |
| contig054630-BurTARs.A023 | contig007512-TiITARs.A024 | 0.306 | 1.059 | 0.289 |
| contig025313-BriTAR.A002  | contig046014-NyeTARs.A024 | 0.366 | 1.267 | 0.289 |
| contig023443-TiITAR.A005  | contig022320-TiITARs.A059 | 0.344 | 1.192 | 0.289 |
| contig059768-ZebTARs.A022 | contig030445-ZebTARs.A026 | 0.316 | 1.093 | 0.289 |
| contig039639-TiITAR.A001  | contig066056-ZebTARs.A017 | 0.385 | 1.332 | 0.289 |
| contig084886-BriTARs.A017 | contig039640-TiITAR.A003  | 0.404 | 1.399 | 0.289 |
| contig032272-NyeTAR.A004  | contig022378-TiITARs.A051 | 0.302 | 1.045 | 0.289 |
| contig023443-TiITAR.A005  | contig040586-ZebTAR.A001  | 0.317 | 1.097 | 0.289 |
| contig038663-NyeTAR.A005  | contig003909-ZebTAR.A003  | 0.318 | 1.098 | 0.289 |
| contig023443-TiITAR.A005  | contig022382-TiITARs.A053 | 0.320 | 1.106 | 0.290 |
| contig057148-BurTARs.A028 | contig022354-TiITARs.A038 | 0.022 | 0.074 | 0.290 |
| contig020038-BurTAR.A002  | contig022378-TiITARs.A051 | 0.304 | 1.048 | 0.290 |
| contig035381-NyeTARs.A015 | contig059768-ZebTARs.A022 | 0.312 | 1.076 | 0.290 |
| contig025313-BriTAR.A002  | contig066056-ZebTARs.A017 | 0.318 | 1.094 | 0.290 |
| contig025313-BriTAR.A002  | contig030445-ZebTARs.A026 | 0.312 | 1.075 | 0.290 |
| contig025313-BriTAR.A002  | contig041024-BurTARs.A026 | 0.358 | 1.233 | 0.290 |
| contig056200-NyeTARs.A029 | contig039639-TiITAR.A001  | 0.404 | 1.388 | 0.291 |
| contig035381-NyeTARs.A015 | contig003909-ZebTAR.A003  | 0.318 | 1.095 | 0.291 |
| contig023443-TiITAR.A005  | contig061417-ZebTARs.A020 | 0.347 | 1.192 | 0.291 |
| contig025313-BriTAR.A002  | contig061977-BurTARs.A012 | 0.298 | 1.024 | 0.291 |
| contig025313-BriTAR.A002  | contig082565-BriTARs.A022 | 0.315 | 1.083 | 0.291 |
| contig057145-BurTARs.A018 | contig039640-TiITAR.A002  | 0.408 | 1.401 | 0.291 |
| contig086337-BriTARs.A019 | contig060707-BurTARs.A015 | 0.264 | 0.905 | 0.291 |
| contig032272-NyeTAR.A004  | contig039642-TiITAR.A004  | 0.313 | 1.077 | 0.291 |
| contig082565-BriTARs.A022 | contig054630-BurTARs.A023 | 0.324 | 1.113 | 0.291 |
| contig039642-TiITAR.A004  | contig040586-ZebTAR.A002  | 0.017 | 0.060 | 0.291 |
| contig035376-NyeTARs.A014 | contig059768-ZebTARs.A022 | 0.325 | 1.114 | 0.292 |
| contig032272-NyeTAR.A004  | contig038663-NyeTAR.A005  | 0.320 | 1.097 | 0.292 |
| contig039640-TiITAR.A002  | contig022363-TiITARs.A043 | 0.423 | 1.449 | 0.292 |
| contig060707-BurTARs.A015 | contig053139-ZebTARs.A023 | 0.262 | 0.897 | 0.292 |
| contig032272-NyeTAR.A004  | contig035381-NyeTARs.A015 | 0.317 | 1.086 | 0.292 |
| contig007520-TiITARs.A025 | contig059768-ZebTARs.A022 | 0.333 | 1.140 | 0.292 |
| contig032272-NyeTAR.A004  | contig039640-TiITAR.A002  | 0.324 | 1.109 | 0.292 |
| contig039640-TiITAR.A003  | contig022365-TiITARs.A045 | 0.406 | 1.388 | 0.292 |
| contig040586-ZebTAR.A002  | contig003909-ZebTAR.A003  | 0.312 | 1.066 | 0.293 |
| contig046014-NyeTARs.A024 | contig003909-ZebTAR.A003  | 0.376 | 1.284 | 0.293 |
| contig045302-BurTAR.A001  | contig003909-ZebTAR.A003  | 0.319 | 1.089 | 0.293 |
| contig032272-NyeTAR.A004  | contig039639-TiITAR.A001  | 0.316 | 1.078 | 0.293 |
| contig039642-TiITAR.A004  | contig066056-ZebTARs.A017 | 0.386 | 1.317 | 0.293 |
| contig003909-ZebTAR.A003  | contig061417-ZebTARs.A020 | 0.370 | 1.261 | 0.294 |
| contig003909-ZebTAR.A003  | contig030445-ZebTARs.A026 | 0.314 | 1.068 | 0.294 |
| contig049534-BurTARs.A025 | contig022377-TiITARs.A050 | 0.024 | 0.083 | 0.294 |
| contig025313-BriTAR.A002  | contig022363-TiITARs.A043 | 0.378 | 1.286 | 0.294 |
| contig032272-NyeTAR.A004  | contig061417-ZebTARs.A020 | 0.370 | 1.260 | 0.294 |

|                           |                           |       |       |       |
|---------------------------|---------------------------|-------|-------|-------|
| contig038663-NyeTAR.A005  | contig023443-TiTAR.A005   | 0.322 | 1.095 | 0.294 |
| contig032272-NyeTAR.A004  | contig062677-ZebTARs.A018 | 0.348 | 1.183 | 0.294 |
| contig032272-NyeTAR.A004  | contig023443-TiTAR.A005   | 0.017 | 0.058 | 0.294 |
| contig082565-BriTARs.A022 | contig003909-ZebTAR.A003  | 0.317 | 1.076 | 0.294 |
| contig025313-BriTAR.A002  | contig045302-BurTAR.A001  | 0.318 | 1.079 | 0.294 |
| contig039640-TiTAR.A003   | contig022363-TiTARs.A043  | 0.415 | 1.409 | 0.294 |
| contig025313-BriTAR.A002  | contig062677-ZebTARs.A018 | 0.342 | 1.160 | 0.295 |
| contig022377-TiTARs.A050  | contig066285-ZebTARs.A016 | 0.026 | 0.088 | 0.295 |
| contig082565-BriTARs.A022 | contig059768-ZebTARs.A022 | 0.318 | 1.079 | 0.295 |
| contig041024-BurTARs.A026 | contig003909-ZebTAR.A003  | 0.368 | 1.248 | 0.295 |
| contig007512-TiTARs.A024  | contig066056-ZebTARs.A017 | 0.263 | 0.891 | 0.295 |
| contig029633-BriTAR.A003  | contig066056-ZebTARs.A017 | 0.402 | 1.362 | 0.295 |
| contig032272-NyeTAR.A004  | contig030445-ZebTARs.A026 | 0.313 | 1.059 | 0.295 |
| contig045302-BurTAR.A001  | contig038663-NyeTAR.A005  | 0.009 | 0.029 | 0.295 |
| contig025313-BriTAR.A002  | contig056021-BurTARs.A020 | 0.363 | 1.228 | 0.295 |
| contig049540-BurTARs.A024 | contig039639-TiTAR.A001   | 0.400 | 1.354 | 0.295 |
| contig003909-ZebTAR.A003  | contig062677-ZebTARs.A018 | 0.344 | 1.164 | 0.295 |
| contig082565-BriTARs.A022 | contig032272-NyeTAR.A004  | 0.316 | 1.068 | 0.296 |
| contig057148-BurTARs.A028 | contig039640-TiTAR.A003   | 0.409 | 1.383 | 0.296 |
| contig061433-BurTARs.A013 | contig022324-TiTARs.A027  | 0.028 | 0.093 | 0.296 |
| contig020038-BurTAR.A002  | contig040586-ZebTAR.A002  | 0.316 | 1.068 | 0.296 |
| contig061977-BurTARs.A012 | contig032272-NyeTAR.A004  | 0.301 | 1.018 | 0.296 |
| contig041024-BurTARs.A026 | contig039639-TiTAR.A001   | 0.401 | 1.354 | 0.296 |
| contig025313-BriTAR.A002  | contig022345-TiTARs.A034  | 0.350 | 1.183 | 0.296 |
| contig034854-BurTARs.A027 | contig023443-TiTAR.A005   | 0.322 | 1.089 | 0.296 |
| contig029633-BriTAR.A003  | contig023443-TiTAR.A005   | 0.332 | 1.121 | 0.296 |
| contig045302-BurTAR.A001  | contig020038-BurTAR.A002  | 0.323 | 1.091 | 0.296 |
| contig061977-BurTARs.A012 | contig003909-ZebTAR.A003  | 0.301 | 1.017 | 0.296 |
| contig023443-TiTAR.A005   | contig061410-ZebTARs.A021 | 0.290 | 0.978 | 0.296 |
| contig025313-BriTAR.A002  | contig035376-NyeTARs.A014 | 0.322 | 1.086 | 0.297 |
| contig039639-TiTAR.A001   | contig062677-ZebTARs.A018 | 0.402 | 1.355 | 0.297 |
| contig054630-BurTARs.A023 | contig007520-TiTARs.A025  | 0.340 | 1.143 | 0.297 |
| contig032272-NyeTAR.A004  | contig022382-TiTARs.A053  | 0.336 | 1.132 | 0.297 |
| contig056200-NyeTARs.A029 | contig039640-TiTAR.A002   | 0.390 | 1.313 | 0.297 |
| contig025313-BriTAR.A002  | contig022382-TiTARs.A053  | 0.330 | 1.110 | 0.297 |
| contig039640-TiTAR.A002   | contig066056-ZebTARs.A017 | 0.393 | 1.321 | 0.297 |
| contig023443-TiTAR.A005   | contig062677-ZebTARs.A018 | 0.335 | 1.127 | 0.298 |
| contig039639-TiTAR.A001   | contig022382-TiTARs.A053  | 0.395 | 1.327 | 0.298 |
| contig041024-BurTARs.A026 | contig022341-TiTARs.A032  | 0.110 | 0.368 | 0.298 |
| contig032272-NyeTAR.A004  | contig046014-NyeTARs.A024 | 0.376 | 1.262 | 0.298 |
| contig032272-NyeTAR.A004  | contig003909-ZebTAR.A003  | 0.006 | 0.019 | 0.298 |
| contig022382-TiTARs.A053  | contig003909-ZebTAR.A003  | 0.332 | 1.114 | 0.298 |
| contig022334-TiTARs.A030  | contig022375-TiTARs.A048  | 0.107 | 0.357 | 0.299 |
| contig046010-NyeTARs.A019 | contig022354-TiTARs.A038  | 0.019 | 0.062 | 0.299 |
| contig035376-NyeTARs.A014 | contig022390-TiTARs.A055  | 0.032 | 0.106 | 0.299 |
| contig039642-TiTAR.A004   | contig022363-TiTARs.A043  | 0.421 | 1.408 | 0.299 |
| contig025313-BriTAR.A002  | contig022320-TiTARs.A059  | 0.359 | 1.199 | 0.299 |
| contig023443-TiTAR.A005   | contig022341-TiTARs.A032  | 0.356 | 1.187 | 0.300 |
| contig020038-BurTAR.A002  | contig035381-NyeTARs.A015 | 0.319 | 1.064 | 0.300 |
| contig035377-NyeTARs.A023 | contig003909-ZebTAR.A003  | 0.340 | 1.134 | 0.300 |
| contig045302-BurTAR.A001  | contig032272-NyeTAR.A004  | 0.321 | 1.072 | 0.300 |
| contig023443-TiTAR.A005   | contig062676-ZebTARs.A019 | 0.299 | 0.999 | 0.300 |
| contig056134-TiTARs.A058  | contig059768-ZebTARs.A022 | 0.311 | 1.037 | 0.300 |

|                           |                           |       |       |       |
|---------------------------|---------------------------|-------|-------|-------|
| contig023443-TiITAR.A005  | contig066056-ZebTARs.A017 | 0.319 | 1.065 | 0.300 |
| contig035376-NyeTARs.A014 | contig003909-ZebTAR.A003  | 0.324 | 1.079 | 0.300 |
| contig041024-BurTARs.A026 | contig032272-NyeTAR.A004  | 0.368 | 1.228 | 0.300 |
| contig056021-BurTARs.A020 | contig023443-TiITAR.A005  | 0.349 | 1.162 | 0.300 |
| contig032272-NyeTAR.A004  | contig035377-NyeTARs.A023 | 0.340 | 1.133 | 0.300 |
| contig039640-TiITAR.A003  | contig030464-ZebTARs.A025 | 0.419 | 1.397 | 0.300 |
| contig039640-TiITAR.A002  | contig030464-ZebTARs.A025 | 0.429 | 1.430 | 0.300 |
| contig020038-BurTAR.A002  | contig046014-NyeTARs.A024 | 0.381 | 1.267 | 0.300 |
| contig040586-ZebTAR.A002  | contig066056-ZebTARs.A017 | 0.388 | 1.289 | 0.301 |
| contig060707-BurTARs.A015 | contig055697-BurTARs.A022 | 0.265 | 0.882 | 0.301 |
| contig062039-NyeTARs.A022 | contig039639-TiITAR.A001  | 0.350 | 1.161 | 0.301 |
| contig039640-TiITAR.A003  | contig022354-TiITARs.A037 | 0.373 | 1.238 | 0.301 |
| contig020038-BurTAR.A002  | contig061417-ZebTARs.A020 | 0.375 | 1.244 | 0.301 |
| contig086351-BriTARs.A021 | contig039639-TiITAR.A001  | 0.447 | 1.483 | 0.301 |
| contig032272-NyeTAR.A004  | contig035376-NyeTARs.A014 | 0.323 | 1.071 | 0.301 |
| contig039642-TiITAR.A004  | contig022354-TiITARs.A038 | 0.426 | 1.413 | 0.301 |
| contig056200-NyeTARs.A029 | contig039640-TiITAR.A003  | 0.382 | 1.268 | 0.302 |
| contig049540-BurTARs.A024 | contig039640-TiITAR.A002  | 0.387 | 1.282 | 0.302 |
| contig062039-NyeTARs.A022 | contig059768-ZebTARs.A022 | 0.314 | 1.039 | 0.302 |
| contig032272-NyeTAR.A004  | contig056200-NyeTARs.A029 | 0.349 | 1.156 | 0.302 |
| contig045302-BurTAR.A001  | contig023443-TiITAR.A005  | 0.323 | 1.069 | 0.302 |
| contig020038-BurTAR.A002  | contig041024-BurTARs.A026 | 0.372 | 1.232 | 0.302 |
| contig020038-BurTAR.A002  | contig030445-ZebTARs.A026 | 0.314 | 1.038 | 0.302 |
| contig022341-TiITARs.A032 | contig003909-ZebTAR.A003  | 0.371 | 1.227 | 0.302 |
| contig025313-BriTAR.A002  | contig056200-NyeTARs.A029 | 0.343 | 1.134 | 0.302 |
| contig084868-BriTARs.A014 | contig023443-TiITAR.A005  | 0.307 | 1.013 | 0.303 |
| contig039639-TiITAR.A001  | contig022334-TiITARs.A030 | 0.357 | 1.179 | 0.303 |
| contig082565-BriTARs.A022 | contig020038-BurTAR.A002  | 0.317 | 1.046 | 0.303 |
| contig022363-TiITARs.A043 | contig022390-TiITARs.A055 | 0.207 | 0.683 | 0.303 |
| contig056200-NyeTARs.A029 | contig003909-ZebTAR.A003  | 0.345 | 1.138 | 0.303 |
| contig039640-TiITAR.A002  | contig062677-ZebTARs.A018 | 0.399 | 1.315 | 0.304 |
| contig003909-ZebTAR.A003  | contig030440-ZebTARs.A029 | 0.336 | 1.107 | 0.304 |
| contig039640-TiITAR.A003  | contig022378-TiITARs.A051 | 0.346 | 1.141 | 0.304 |
| contig056134-TiITARs.A058 | contig066056-ZebTARs.A017 | 0.285 | 0.937 | 0.304 |
| contig046010-NyeTARs.A019 | contig039640-TiITAR.A003  | 0.411 | 1.352 | 0.304 |
| contig022320-TiITARs.A059 | contig003909-ZebTAR.A003  | 0.369 | 1.214 | 0.304 |
| contig039640-TiITAR.A003  | contig066056-ZebTARs.A017 | 0.384 | 1.265 | 0.304 |
| contig061091-BurTARs.A014 | contig023443-TiITAR.A005  | 0.381 | 1.254 | 0.304 |
| contig054630-BurTARs.A023 | contig022378-TiITARs.A051 | 0.318 | 1.047 | 0.304 |
| contig056020-BurTARs.A021 | contig041024-BurTARs.A026 | 0.099 | 0.326 | 0.304 |
| contig046010-NyeTARs.A019 | contig039640-TiITAR.A002  | 0.421 | 1.383 | 0.304 |
| contig065494-BurTARs.A030 | contig059768-ZebTARs.A022 | 0.297 | 0.978 | 0.304 |
| contig023443-TiITAR.A005  | contig030440-ZebTARs.A029 | 0.323 | 1.060 | 0.304 |
| contig039639-TiITAR.A001  | contig022378-TiITARs.A051 | 0.352 | 1.156 | 0.305 |
| contig059766-BurTARs.A029 | contig066330-ZebTARs.A027 | 0.013 | 0.042 | 0.305 |
| contig057148-BurTARs.A028 | contig039640-TiITAR.A002  | 0.417 | 1.368 | 0.305 |
| contig025313-BriTAR.A002  | contig030440-ZebTARs.A029 | 0.336 | 1.104 | 0.305 |
| contig066056-ZebTARs.A017 | contig053145-ZebTARs.A028 | 0.262 | 0.859 | 0.305 |
| contig034854-BurTARs.A027 | contig003909-ZebTAR.A003  | 0.342 | 1.123 | 0.305 |
| contig039639-TiITAR.A001  | contig022365-TiITARs.A045 | 0.429 | 1.408 | 0.305 |
| contig025313-BriTAR.A002  | contig034854-BurTARs.A027 | 0.340 | 1.117 | 0.305 |
| contig023443-TiITAR.A005  | contig022345-TiITARs.A034 | 0.338 | 1.109 | 0.305 |
| contig022341-TiITARs.A032 | contig022320-TiITARs.A059 | 0.109 | 0.356 | 0.305 |

|                           |                           |       |       |       |
|---------------------------|---------------------------|-------|-------|-------|
| contig025313-BriTAR.A002  | contig059673-BurTARs.A016 | 0.371 | 1.215 | 0.305 |
| contig039639-TiITAR.A001  | contig053145-ZebTARs.A028 | 0.366 | 1.199 | 0.305 |
| contig060292-NyeTARs.A027 | contig039640-TiITAR.A002  | 0.458 | 1.500 | 0.305 |
| contig056200-NyeTARs.A029 | contig023443-TiITAR.A005  | 0.337 | 1.102 | 0.305 |
| contig086337-BriTARs.A019 | contig086344-BriTARs.A020 | 0.268 | 0.877 | 0.306 |
| contig032272-NyeTAR.A004  | contig040586-ZebTAR.A002  | 0.316 | 1.035 | 0.306 |
| contig049540-BurTARs.A024 | contig039640-TiITAR.A003  | 0.379 | 1.239 | 0.306 |
| contig022341-TiITARs.A032 | contig022390-TiITARs.A055 | 0.213 | 0.697 | 0.306 |
| contig059766-BurTARs.A029 | contig066056-ZebTARs.A017 | 0.260 | 0.849 | 0.306 |
| contig054630-BurTARs.A023 | contig056134-TiITARs.A058 | 0.317 | 1.037 | 0.306 |
| contig062039-NyeTARs.A022 | contig039642-TiITAR.A004  | 0.340 | 1.110 | 0.306 |
| contig020038-BurTAR.A002  | contig035377-NyeTARs.A023 | 0.341 | 1.112 | 0.306 |
| contig057305-BurTARs.A031 | contig039640-TiITAR.A002  | 0.463 | 1.509 | 0.307 |
| contig022354-TiITARs.A038 | contig022357-TiITARs.A041 | 0.096 | 0.313 | 0.307 |
| contig086351-BriTARs.A021 | contig039640-TiITAR.A002  | 0.447 | 1.456 | 0.307 |
| contig054630-BurTARs.A023 | contig062039-NyeTARs.A022 | 0.320 | 1.041 | 0.307 |
| contig039640-TiITAR.A003  | contig062677-ZebTARs.A018 | 0.381 | 1.240 | 0.307 |
| contig034854-BurTARs.A027 | contig032272-NyeTAR.A004  | 0.342 | 1.111 | 0.307 |
| contig022378-TiITARs.A051 | contig059768-ZebTARs.A022 | 0.312 | 1.015 | 0.307 |
| contig022353-TiITARs.A036 | contig022390-TiITARs.A055 | 0.197 | 0.640 | 0.308 |
| contig025313-BriTAR.A002  | contig061410-ZebTARs.A021 | 0.302 | 0.982 | 0.308 |
| contig060707-BurTARs.A015 | contig066056-ZebTARs.A017 | 0.016 | 0.051 | 0.308 |
| contig032272-NyeTAR.A004  | contig022341-TiITARs.A032 | 0.371 | 1.207 | 0.308 |
| contig039640-TiITAR.A002  | contig022354-TiITARs.A037 | 0.382 | 1.242 | 0.308 |
| contig055697-BurTARs.A022 | contig022383-TiITARs.A054 | 0.274 | 0.889 | 0.308 |
| contig039639-TiITAR.A001  | contig022363-TiITARs.A043 | 0.438 | 1.422 | 0.308 |
| contig032272-NyeTAR.A004  | contig022345-TiITARs.A034 | 0.358 | 1.162 | 0.308 |
| contig039640-TiITAR.A002  | contig022382-TiITARs.A053 | 0.397 | 1.288 | 0.308 |
| contig039640-TiITAR.A003  | contig022356-TiITARs.A040 | 0.408 | 1.322 | 0.308 |
| contig056021-BurTARs.A020 | contig003909-ZebTAR.A003  | 0.372 | 1.207 | 0.309 |
| contig025313-BriTAR.A002  | contig029633-BriTAR.A003  | 0.332 | 1.076 | 0.309 |
| contig039639-TiITAR.A001  | contig022368-TiITARs.A046 | 0.418 | 1.355 | 0.309 |
| contig029633-BriTAR.A003  | contig003909-ZebTAR.A003  | 0.332 | 1.077 | 0.309 |
| contig020038-BurTAR.A002  | contig035376-NyeTARs.A014 | 0.324 | 1.049 | 0.309 |
| contig039640-TiITAR.A003  | contig022382-TiITARs.A053 | 0.381 | 1.235 | 0.309 |
| contig060707-BurTARs.A015 | contig039639-TiITAR.A001  | 0.404 | 1.307 | 0.309 |
| contig039639-TiITAR.A001  | contig022354-TiITARs.A037 | 0.383 | 1.239 | 0.309 |
| contig056021-BurTARs.A020 | contig032272-NyeTAR.A004  | 0.373 | 1.206 | 0.309 |
| contig059768-ZebTARs.A022 | contig066330-ZebTARs.A027 | 0.298 | 0.965 | 0.309 |
| contig022356-TiITARs.A040 | contig061417-ZebTARs.A020 | 0.088 | 0.285 | 0.309 |
| contig084886-BriTARs.A017 | contig039642-TiITAR.A004  | 0.427 | 1.382 | 0.309 |
| contig086344-BriTARs.A020 | contig053139-ZebTARs.A023 | 0.268 | 0.868 | 0.309 |
| contig032272-NyeTAR.A004  | contig022320-TiITARs.A059 | 0.369 | 1.194 | 0.309 |
| contig025313-BriTAR.A002  | contig066890-ZebTARs.A014 | 0.337 | 1.091 | 0.309 |
| contig055697-BurTARs.A022 | contig062039-NyeTARs.A022 | 0.275 | 0.889 | 0.309 |
| contig007524-TiITARs.A026 | contig059768-ZebTARs.A022 | 0.340 | 1.100 | 0.309 |
| contig065494-BurTARs.A030 | contig066056-ZebTARs.A017 | 0.265 | 0.855 | 0.309 |
| contig032272-NyeTAR.A004  | contig030440-ZebTARs.A029 | 0.335 | 1.082 | 0.310 |
| contig022345-TiITARs.A034 | contig003909-ZebTAR.A003  | 0.358 | 1.157 | 0.310 |
| contig045302-BurTAR.A001  | contig066056-ZebTARs.A017 | 0.401 | 1.295 | 0.310 |
| contig046007-NyeTARs.A017 | contig022355-TiITARs.A039 | 0.024 | 0.079 | 0.310 |
| contig039639-TiITAR.A001  | contig022320-TiITARs.A059 | 0.411 | 1.325 | 0.310 |
| contig039640-TiITAR.A003  | contig022334-TiITARs.A030 | 0.364 | 1.174 | 0.310 |

|                           |                           |       |       |       |
|---------------------------|---------------------------|-------|-------|-------|
| contig020038-BurTAR.A002  | contig022341-TiITARs.A032 | 0.375 | 1.211 | 0.310 |
| contig059673-BurTARs.A016 | contig003909-ZebTAR.A003  | 0.388 | 1.252 | 0.310 |
| contig020038-BurTAR.A002  | contig062677-ZebTARs.A018 | 0.352 | 1.135 | 0.310 |
| contig020038-BurTAR.A002  | contig061977-BurTARs.A012 | 0.306 | 0.987 | 0.310 |
| contig022383-TiITARs.A054 | contig059768-ZebTARs.A022 | 0.324 | 1.042 | 0.311 |
| contig023443-TiITAR.A005  | contig066890-ZebTARs.A014 | 0.330 | 1.064 | 0.311 |
| contig054630-BurTARs.A023 | contig065494-BurTARs.A030 | 0.304 | 0.978 | 0.311 |
| contig056020-BurTARs.A021 | contig046014-NyeTARs.A024 | 0.101 | 0.325 | 0.311 |
| contig086351-BriTARs.A021 | contig023443-TiITAR.A005  | 0.376 | 1.208 | 0.311 |
| contig059766-BurTARs.A029 | contig039639-TiITAR.A001  | 0.368 | 1.183 | 0.311 |
| contig039640-TiITAR.A003  | contig022368-TiITARs.A046 | 0.403 | 1.294 | 0.311 |
| contig049540-BurTARs.A024 | contig032272-NyeTAR.A004  | 0.349 | 1.123 | 0.311 |
| contig060292-NyeTARs.A027 | contig039639-TiITAR.A001  | 0.450 | 1.447 | 0.311 |
| contig025313-BriTAR.A002  | contig022368-TiITARs.A047 | 0.370 | 1.188 | 0.311 |
| contig055697-BurTARs.A022 | contig039639-TiITAR.A001  | 0.390 | 1.254 | 0.311 |
| contig025313-BriTAR.A002  | contig049540-BurTARs.A024 | 0.343 | 1.101 | 0.311 |
| contig066056-ZebTARs.A017 | contig066330-ZebTARs.A027 | 0.270 | 0.866 | 0.311 |
| contig062039-NyeTARs.A022 | contig040586-ZebTAR.A001  | 0.360 | 1.156 | 0.312 |
| contig020038-BurTAR.A002  | contig022320-TiITARs.A059 | 0.373 | 1.198 | 0.312 |
| contig058002-NyeTARs.A025 | contig059768-ZebTARs.A022 | 0.348 | 1.118 | 0.312 |
| contig086337-BriTARs.A019 | contig060105-NyeTARs.A018 | 0.267 | 0.857 | 0.312 |
| contig023443-TiITAR.A005  | contig066691-ZebTARs.A015 | 0.386 | 1.238 | 0.312 |
| contig020038-BurTAR.A002  | contig030440-ZebTARs.A029 | 0.336 | 1.078 | 0.312 |
| contig086351-BriTARs.A021 | contig032272-NyeTAR.A004  | 0.383 | 1.228 | 0.312 |
| contig025313-BriTAR.A002  | contig058002-NyeTARs.A025 | 0.339 | 1.088 | 0.312 |
| contig059766-BurTARs.A029 | contig023443-TiITAR.A005  | 0.333 | 1.069 | 0.312 |
| contig029633-BriTAR.A003  | contig020038-BurTAR.A002  | 0.337 | 1.079 | 0.312 |
| contig060707-BurTARs.A015 | contig053145-ZebTARs.A028 | 0.266 | 0.851 | 0.312 |
| contig039639-TiITAR.A001  | contig022362-TiITARs.A042 | 0.417 | 1.336 | 0.312 |
| contig023443-TiITAR.A005  | contig022383-TiITARs.A054 | 0.304 | 0.974 | 0.312 |
| contig023443-TiITAR.A005  | contig053145-ZebTARs.A028 | 0.338 | 1.082 | 0.312 |
| contig057305-BurTARs.A031 | contig039639-TiITAR.A001  | 0.455 | 1.456 | 0.312 |
| contig062039-NyeTARs.A022 | contig007512-TiITARs.A024 | 0.281 | 0.899 | 0.312 |
| contig049540-BurTARs.A024 | contig003909-ZebTAR.A003  | 0.345 | 1.105 | 0.312 |
| contig039640-TiITAR.A003  | contig022362-TiITARs.A042 | 0.399 | 1.276 | 0.313 |
| contig062039-NyeTARs.A022 | contig039640-TiITAR.A002  | 0.346 | 1.105 | 0.313 |
| contig025313-BriTAR.A002  | contig022368-TiITARs.A046 | 0.384 | 1.226 | 0.313 |
| contig060105-NyeTARs.A018 | contig053139-ZebTARs.A023 | 0.266 | 0.849 | 0.313 |
| contig020038-BurTAR.A002  | contig022345-TiITARs.A034 | 0.361 | 1.154 | 0.313 |
| contig029633-BriTAR.A003  | contig057145-BurTARs.A018 | 0.424 | 1.354 | 0.313 |
| contig003909-ZebTAR.A003  | contig061410-ZebTARs.A021 | 0.306 | 0.976 | 0.313 |
| contig025313-BriTAR.A002  | contig022365-TiITARs.A045 | 0.392 | 1.251 | 0.313 |
| contig057148-BurTARs.A028 | contig022337-TiITARs.A031 | 0.125 | 0.398 | 0.313 |
| contig055697-BurTARs.A022 | contig039640-TiITAR.A003  | 0.380 | 1.213 | 0.313 |
| contig060707-BurTARs.A015 | contig059766-BurTARs.A029 | 0.264 | 0.841 | 0.313 |
| contig046010-NyeTARs.A019 | contig022337-TiITARs.A031 | 0.121 | 0.387 | 0.313 |
| contig049534-BurTARs.A025 | contig041024-BurTARs.A026 | 0.130 | 0.415 | 0.313 |
| contig057305-BurTARs.A031 | contig032272-NyeTAR.A004  | 0.385 | 1.229 | 0.313 |
| contig022378-TiITARs.A051 | contig040586-ZebTAR.A001  | 0.356 | 1.134 | 0.314 |
| contig020038-BurTAR.A002  | contig034854-BurTARs.A027 | 0.342 | 1.091 | 0.314 |
| contig023443-TiITAR.A005  | contig022330-TiITARs.A028 | 0.348 | 1.109 | 0.314 |
| contig065494-BurTARs.A030 | contig039639-TiITAR.A001  | 0.369 | 1.175 | 0.314 |
| contig054630-BurTARs.A023 | contig007524-TiITARs.A026 | 0.347 | 1.103 | 0.314 |



|                           |                           |       |       |       |
|---------------------------|---------------------------|-------|-------|-------|
| contig025313-BriTAR.A002  | contig061091-BurTARs.A014 | 0.388 | 1.233 | 0.314 |
| contig046014-NyeTARs.A024 | contig039639-TiITAR.A001  | 0.406 | 1.292 | 0.314 |
| contig084887-BriTARs.A018 | contig023443-TiITAR.A005  | 0.381 | 1.213 | 0.314 |
| contig049540-BurTARs.A024 | contig023443-TiITAR.A005  | 0.337 | 1.070 | 0.315 |
| contig020038-BurTAR.A002  | contig059673-BurTARs.A016 | 0.383 | 1.218 | 0.315 |
| contig057305-BurTARs.A031 | contig023443-TiITAR.A005  | 0.380 | 1.209 | 0.315 |
| contig039639-TiITAR.A001  | contig022337-TiITARs.A031 | 0.430 | 1.366 | 0.315 |
| contig022337-TiITARs.A031 | contig022390-TiITARs.A055 | 0.192 | 0.611 | 0.315 |
| contig035375-NyeTARs.A013 | contig003909-ZebTAR.A003  | 0.339 | 1.076 | 0.315 |
| contig025313-BriTAR.A002  | contig022330-TiITARs.A028 | 0.361 | 1.146 | 0.315 |
| contig003909-ZebTAR.A003  | contig066056-ZebTARs.A017 | 0.328 | 1.040 | 0.315 |
| contig022363-TiITARs.A043 | contig003909-ZebTAR.A003  | 0.382 | 1.213 | 0.315 |
| contig059673-BurTARs.A016 | contig023443-TiITAR.A005  | 0.367 | 1.165 | 0.315 |
| contig035375-NyeTARs.A013 | contig023443-TiITAR.A005  | 0.325 | 1.031 | 0.316 |
| contig054630-BurTARs.A023 | contig066330-ZebTARs.A027 | 0.305 | 0.965 | 0.316 |
| contig039639-TiITAR.A001  | contig066330-ZebTARs.A027 | 0.374 | 1.185 | 0.316 |
| contig032272-NyeTAR.A004  | contig066056-ZebTARs.A017 | 0.329 | 1.044 | 0.316 |
| contig025313-BriTAR.A002  | contig035375-NyeTARs.A013 | 0.339 | 1.073 | 0.316 |
| contig032272-NyeTAR.A004  | contig061410-ZebTARs.A021 | 0.311 | 0.984 | 0.316 |
| contig062039-NyeTARs.A022 | contig053139-ZebTARs.A023 | 0.281 | 0.889 | 0.316 |
| contig040586-ZebTAR.A001  | contig066056-ZebTARs.A017 | 0.404 | 1.278 | 0.316 |
| contig039639-TiITAR.A001  | contig022363-TiITARs.A044 | 0.399 | 1.264 | 0.316 |
| contig003909-ZebTAR.A003  | contig062676-ZebTARs.A019 | 0.321 | 1.016 | 0.316 |
| contig084886-BriTARs.A017 | contig022357-TiITARs.A041 | 0.107 | 0.337 | 0.316 |
| contig057148-BurTARs.A028 | contig039642-TiITAR.A004  | 0.432 | 1.366 | 0.316 |
| contig060707-BurTARs.A015 | contig056134-TiITARs.A058 | 0.292 | 0.922 | 0.316 |
| contig020038-BurTAR.A002  | contig056021-BurTARs.A020 | 0.377 | 1.192 | 0.316 |
| contig056200-NyeTARs.A029 | contig039642-TiITAR.A004  | 0.405 | 1.281 | 0.316 |
| contig039640-TiITAR.A003  | contig022337-TiITARs.A031 | 0.413 | 1.306 | 0.316 |
| contig039642-TiITAR.A004  | contig022334-TiITARs.A030 | 0.360 | 1.137 | 0.317 |
| contig020038-BurTAR.A002  | contig022382-TiITARs.A053 | 0.342 | 1.079 | 0.317 |
| contig086351-BriTARs.A021 | contig003909-ZebTAR.A003  | 0.381 | 1.204 | 0.317 |
| contig062039-NyeTARs.A022 | contig040586-ZebTAR.A002  | 0.347 | 1.097 | 0.317 |
| contig022363-TiITARs.A043 | contig040586-ZebTAR.A002  | 0.422 | 1.332 | 0.317 |
| contig054630-BurTARs.A023 | contig022383-TiITARs.A054 | 0.330 | 1.042 | 0.317 |
| contig039640-TiITAR.A002  | contig022334-TiITARs.A030 | 0.368 | 1.160 | 0.317 |
| contig060707-BurTARs.A015 | contig065494-BurTARs.A030 | 0.269 | 0.848 | 0.317 |
| contig084876-BriTARs.A015 | contig023443-TiITAR.A005  | 0.302 | 0.953 | 0.317 |
| contig022368-TiITARs.A047 | contig003909-ZebTAR.A003  | 0.377 | 1.189 | 0.317 |
| contig041024-BurTARs.A026 | contig066285-ZebTARs.A016 | 0.131 | 0.413 | 0.317 |
| contig007520-TiITARs.A025 | contig007524-TiITARs.A026 | 0.019 | 0.060 | 0.317 |
| contig023443-TiITAR.A005  | contig030471-ZebTARs.A024 | 0.380 | 1.199 | 0.317 |
| contig046014-NyeTARs.A024 | contig022390-TiITARs.A055 | 0.187 | 0.590 | 0.317 |
| contig039640-TiITAR.A002  | contig022378-TiITARs.A051 | 0.347 | 1.093 | 0.318 |
| contig032272-NyeTAR.A004  | contig022368-TiITARs.A047 | 0.377 | 1.188 | 0.318 |
| contig046013-NyeTARs.A021 | contig023443-TiITAR.A005  | 0.386 | 1.214 | 0.318 |
| contig022383-TiITARs.A054 | contig053139-ZebTARs.A023 | 0.274 | 0.862 | 0.318 |
| contig046007-NyeTARs.A017 | contig003909-ZebTAR.A003  | 0.384 | 1.208 | 0.318 |
| contig039642-TiITAR.A004  | contig062677-ZebTARs.A018 | 0.404 | 1.273 | 0.318 |
| contig054630-BurTARs.A023 | contig058002-NyeTARs.A025 | 0.355 | 1.118 | 0.318 |
| contig060707-BurTARs.A015 | contig039640-TiITAR.A002  | 0.412 | 1.296 | 0.318 |
| contig045302-BurTAR.A001  | contig022354-TiITARs.A038 | 0.432 | 1.360 | 0.318 |
| contig059673-BurTARs.A016 | contig032272-NyeTAR.A004  | 0.386 | 1.213 | 0.318 |

|                           |                           |       |       |       |
|---------------------------|---------------------------|-------|-------|-------|
| contig086344-BriTARs.A020 | contig055697-BurTARs.A022 | 0.272 | 0.854 | 0.318 |
| contig055697-BurTARs.A022 | contig060105-NyeTARs.A018 | 0.265 | 0.832 | 0.318 |
| contig057305-BurTARs.A031 | contig003909-ZebTAR.A003  | 0.384 | 1.205 | 0.318 |
| contig066691-ZebTARs.A015 | contig030471-ZebTARs.A024 | 0.062 | 0.196 | 0.318 |
| contig084886-BriTARs.A017 | contig022390-TiITARs.A055 | 0.201 | 0.631 | 0.318 |
| contig032272-NyeTAR.A004  | contig060292-NyeTARs.A027 | 0.385 | 1.210 | 0.318 |
| contig022365-TiITARs.A045 | contig003909-ZebTAR.A003  | 0.396 | 1.242 | 0.319 |
| contig038663-NyeTAR.A005  | contig066056-ZebTARs.A017 | 0.406 | 1.275 | 0.319 |
| contig023443-TiITAR.A005  | contig007512-TiITARs.A024 | 0.337 | 1.057 | 0.319 |
| contig023443-TiITAR.A005  | contig022334-TiITARs.A029 | 0.352 | 1.103 | 0.319 |
| contig045302-BurTAR.A001  | contig057145-BurTARs.A018 | 0.425 | 1.334 | 0.319 |
| contig060707-BurTARs.A015 | contig066330-ZebTARs.A027 | 0.274 | 0.858 | 0.319 |
| contig007512-TiITARs.A024 | contig003909-ZebTAR.A003  | 0.349 | 1.093 | 0.319 |
| contig086351-BriTARs.A021 | contig045302-BurTAR.A001  | 0.434 | 1.360 | 0.319 |
| contig023443-TiITAR.A005  | contig022375-TiITARs.A048 | 0.345 | 1.081 | 0.319 |
| contig060292-NyeTARs.A027 | contig023443-TiITAR.A005  | 0.380 | 1.191 | 0.319 |
| contig025313-BriTAR.A002  | contig084876-BriTARs.A015 | 0.314 | 0.984 | 0.320 |
| contig025313-BriTAR.A002  | contig022334-TiITARs.A029 | 0.365 | 1.140 | 0.320 |
| contig084868-BriTARs.A014 | contig003909-ZebTAR.A003  | 0.329 | 1.028 | 0.320 |
| contig060105-NyeTARs.A018 | contig053145-ZebTARs.A028 | 0.265 | 0.829 | 0.320 |
| contig058002-NyeTARs.A025 | contig003909-ZebTAR.A003  | 0.352 | 1.099 | 0.320 |
| contig060707-BurTARs.A015 | contig007512-TiITARs.A024 | 0.274 | 0.856 | 0.320 |
| contig025313-BriTAR.A002  | contig062676-ZebTARs.A019 | 0.315 | 0.983 | 0.320 |
| contig039639-TiITAR.A001  | contig022341-TiITARs.A032 | 0.405 | 1.262 | 0.320 |
| contig059766-BurTARs.A029 | contig003909-ZebTAR.A003  | 0.338 | 1.054 | 0.321 |
| contig086344-BriTARs.A020 | contig039639-TiITAR.A001  | 0.416 | 1.299 | 0.321 |
| contig039639-TiITAR.A001  | contig053139-ZebTARs.A023 | 0.395 | 1.232 | 0.321 |
| contig029633-BriTAR.A003  | contig022354-TiITARs.A038 | 0.441 | 1.377 | 0.321 |
| contig025313-BriTAR.A002  | contig022362-TiITARs.A042 | 0.370 | 1.154 | 0.321 |
| contig022354-TiITARs.A038 | contig022390-TiITARs.A055 | 0.182 | 0.568 | 0.321 |
| contig003909-ZebTAR.A003  | contig053145-ZebTARs.A028 | 0.343 | 1.068 | 0.321 |
| contig032272-NyeTAR.A004  | contig035375-NyeTARs.A013 | 0.338 | 1.052 | 0.321 |
| contig003909-ZebTAR.A003  | contig053139-ZebTARs.A023 | 0.349 | 1.087 | 0.321 |
| contig049540-BurTARs.A024 | contig039642-TiITAR.A004  | 0.402 | 1.252 | 0.321 |
| contig025313-BriTAR.A002  | contig059766-BurTARs.A029 | 0.335 | 1.043 | 0.321 |
| contig059766-BurTARs.A029 | contig060105-NyeTARs.A018 | 0.263 | 0.820 | 0.321 |
| contig057145-BurTARs.A018 | contig040586-ZebTAR.A001  | 0.428 | 1.333 | 0.321 |
| contig032272-NyeTAR.A004  | contig022363-TiITARs.A043 | 0.391 | 1.217 | 0.321 |
| contig054630-BurTARs.A023 | contig034854-BurTARs.A027 | 0.340 | 1.058 | 0.321 |
| contig040586-ZebTAR.A002  | contig030464-ZebTARs.A025 | 0.457 | 1.421 | 0.321 |
| contig039639-TiITAR.A001  | contig007512-TiITARs.A024 | 0.400 | 1.246 | 0.321 |
| contig025313-BriTAR.A002  | contig053145-ZebTARs.A028 | 0.339 | 1.056 | 0.321 |
| contig054630-BurTARs.A023 | contig062676-ZebTARs.A019 | 0.331 | 1.030 | 0.322 |
| contig061433-BurTARs.A013 | contig039640-TiITAR.A002  | 0.441 | 1.371 | 0.322 |
| contig023443-TiITAR.A005  | contig022365-TiITARs.A045 | 0.377 | 1.171 | 0.322 |
| contig086351-BriTARs.A021 | contig040586-ZebTAR.A001  | 0.437 | 1.359 | 0.322 |
| contig062676-ZebTARs.A019 | contig053145-ZebTARs.A028 | 0.273 | 0.850 | 0.322 |
| contig022390-TiITARs.A055 | contig066285-ZebTARs.A016 | 0.242 | 0.753 | 0.322 |
| contig020038-BurTAR.A002  | contig056200-NyeTARs.A029 | 0.355 | 1.102 | 0.322 |
| contig023443-TiITAR.A005  | contig022379-TiITARs.A052 | 0.310 | 0.962 | 0.322 |
| contig023443-TiITAR.A005  | contig022356-TiITARs.A040 | 0.346 | 1.075 | 0.322 |
| contig029633-BriTAR.A003  | contig032272-NyeTAR.A004  | 0.337 | 1.045 | 0.322 |
| contig055697-BurTARs.A022 | contig039642-TiITAR.A004  | 0.390 | 1.211 | 0.322 |

|                           |                           |       |       |       |
|---------------------------|---------------------------|-------|-------|-------|
| contig032272-NyeTAR.A004  | contig053139-ZebTARs.A023 | 0.351 | 1.089 | 0.322 |
| contig039639-TiITAR.A001  | contig022349-TiITARs.A035 | 0.433 | 1.342 | 0.322 |
| contig025313-BriTAR.A002  | contig066691-ZebTARs.A015 | 0.392 | 1.216 | 0.322 |
| contig039642-TiITAR.A004  | contig030464-ZebTARs.A025 | 0.445 | 1.380 | 0.322 |
| contig039640-TiITAR.A003  | contig053139-ZebTARs.A023 | 0.385 | 1.193 | 0.323 |
| contig032272-NyeTAR.A004  | contig007524-TiITARs.A026 | 0.361 | 1.118 | 0.323 |
| contig022362-TiITARs.A042 | contig040586-ZebTAR.A001  | 0.415 | 1.284 | 0.323 |
| contig039640-TiITAR.A002  | contig022362-TiITARs.A042 | 0.412 | 1.276 | 0.323 |
| contig022345-TiITARs.A034 | contig066056-ZebTARs.A017 | 0.282 | 0.873 | 0.323 |
| contig025313-BriTAR.A002  | contig060707-BurTARs.A015 | 0.329 | 1.019 | 0.323 |
| contig020038-BurTAR.A002  | contig035375-NyeTARs.A013 | 0.339 | 1.048 | 0.323 |
| contig058002-NyeTARs.A025 | contig039639-TiITAR.A001  | 0.427 | 1.322 | 0.323 |
| contig041024-BurTARs.A026 | contig059768-ZebTARs.A022 | 0.361 | 1.118 | 0.323 |
| contig039642-TiITAR.A004  | contig022382-TiITARs.A053 | 0.397 | 1.228 | 0.323 |
| contig025313-BriTAR.A002  | contig084868-BriTARs.A014 | 0.322 | 0.997 | 0.323 |
| contig060292-NyeTARs.A027 | contig003909-ZebTAR.A003  | 0.384 | 1.187 | 0.323 |
| contig025313-BriTAR.A002  | contig007524-TiITARs.A026 | 0.351 | 1.086 | 0.323 |
| contig060707-BurTARs.A015 | contig039642-TiITAR.A004  | 0.405 | 1.251 | 0.323 |
| contig007512-TiITARs.A024 | contig022383-TiITARs.A054 | 0.290 | 0.895 | 0.324 |
| contig059766-BurTARs.A029 | contig062676-ZebTARs.A019 | 0.275 | 0.851 | 0.324 |
| contig022363-TiITARs.A043 | contig040586-ZebTAR.A001  | 0.428 | 1.322 | 0.324 |
| contig032272-NyeTAR.A004  | contig046007-NyeTARs.A017 | 0.390 | 1.204 | 0.324 |
| contig057148-BurTARs.A028 | contig022320-TiITARs.A059 | 0.127 | 0.391 | 0.324 |
| contig055697-BurTARs.A022 | contig039640-TiITAR.A002  | 0.384 | 1.187 | 0.324 |
| contig061433-BurTARs.A013 | contig039639-TiITAR.A001  | 0.456 | 1.407 | 0.324 |
| contig034854-BurTARs.A027 | contig059768-ZebTARs.A022 | 0.333 | 1.028 | 0.324 |
| contig056020-BurTARs.A021 | contig039639-TiITAR.A001  | 0.435 | 1.342 | 0.324 |
| contig022334-TiITARs.A029 | contig022356-TiITARs.A040 | 0.091 | 0.281 | 0.324 |
| contig086337-BriTARs.A019 | contig022383-TiITARs.A054 | 0.276 | 0.852 | 0.324 |
| contig032272-NyeTAR.A004  | contig062676-ZebTARs.A019 | 0.321 | 0.989 | 0.324 |
| contig055697-BurTARs.A022 | contig023443-TiITAR.A005  | 0.342 | 1.056 | 0.324 |
| contig025313-BriTAR.A002  | contig086351-BriTARs.A021 | 0.377 | 1.162 | 0.324 |
| contig025313-BriTAR.A002  | contig022379-TiITARs.A052 | 0.322 | 0.993 | 0.324 |
| contig022341-TiITARs.A032 | contig022375-TiITARs.A048 | 0.122 | 0.376 | 0.324 |
| contig023443-TiITAR.A005  | contig066330-ZebTARs.A027 | 0.349 | 1.077 | 0.324 |
| contig056020-BurTARs.A021 | contig003909-ZebTAR.A003  | 0.380 | 1.172 | 0.325 |
| contig039640-TiITAR.A003  | contig007512-TiITARs.A024 | 0.390 | 1.202 | 0.325 |
| contig065494-BurTARs.A030 | contig023443-TiITAR.A005  | 0.342 | 1.054 | 0.325 |
| contig023443-TiITAR.A005  | contig007524-TiITARs.A026 | 0.346 | 1.064 | 0.325 |
| contig056020-BurTARs.A021 | contig032272-NyeTAR.A004  | 0.380 | 1.170 | 0.325 |
| contig086351-BriTARs.A021 | contig039640-TiITAR.A003  | 0.441 | 1.356 | 0.325 |
| contig020038-BurTAR.A002  | contig022368-TiITARs.A047 | 0.382 | 1.174 | 0.325 |
| contig062676-ZebTARs.A019 | contig059768-ZebTARs.A022 | 0.325 | 1.000 | 0.325 |
| contig084876-BriTARs.A015 | contig003909-ZebTAR.A003  | 0.318 | 0.977 | 0.325 |
| contig007524-TiITARs.A026 | contig003909-ZebTAR.A003  | 0.363 | 1.117 | 0.325 |
| contig039642-TiITAR.A004  | contig053145-ZebTARs.A028 | 0.371 | 1.140 | 0.325 |
| contig029633-BriTAR.A003  | contig062039-NyeTARs.A022 | 0.363 | 1.117 | 0.325 |
| contig041024-BurTARs.A026 | contig039640-TiITAR.A003  | 0.411 | 1.263 | 0.325 |
| contig086337-BriTARs.A019 | contig062039-NyeTARs.A022 | 0.286 | 0.877 | 0.325 |
| contig058002-NyeTARs.A025 | contig023443-TiITAR.A005  | 0.336 | 1.033 | 0.326 |
| contig025313-BriTAR.A002  | contig030471-ZebTARs.A024 | 0.395 | 1.212 | 0.326 |
| contig029633-BriTAR.A003  | contig060707-BurTARs.A015 | 0.421 | 1.292 | 0.326 |
| contig020038-BurTAR.A002  | contig066056-ZebTARs.A017 | 0.333 | 1.022 | 0.326 |

|                           |                           |       |       |       |
|---------------------------|---------------------------|-------|-------|-------|
| contig084887-BriTARs.A018 | contig039639-TiITAR.A001  | 0.429 | 1.315 | 0.326 |
| contig025313-BriTAR.A002  | contig022356-TiITARs.A040 | 0.360 | 1.105 | 0.326 |
| contig038663-NyeTAR.A005  | contig062039-NyeTARs.A022 | 0.368 | 1.129 | 0.326 |
| contig045302-BurTAR.A001  | contig022378-TiITARs.A051 | 0.360 | 1.103 | 0.326 |
| contig032272-NyeTAR.A004  | contig007512-TiITARs.A024 | 0.356 | 1.092 | 0.326 |
| contig056020-BurTARs.A021 | contig039640-TiITAR.A003  | 0.431 | 1.321 | 0.326 |
| contig046010-NyeTARs.A019 | contig039642-TiITAR.A004  | 0.436 | 1.335 | 0.327 |
| contig039639-TiITAR.A001  | contig022375-TiITARs.A048 | 0.392 | 1.200 | 0.327 |
| contig020038-BurTAR.A002  | contig022365-TiITARs.A045 | 0.400 | 1.226 | 0.327 |
| contig055697-BurTARs.A022 | contig030445-ZebTARs.A026 | 0.258 | 0.791 | 0.327 |
| contig032272-NyeTAR.A004  | contig058002-NyeTARs.A025 | 0.349 | 1.069 | 0.327 |
| contig045302-BurTAR.A001  | contig062039-NyeTARs.A022 | 0.362 | 1.107 | 0.327 |
| contig022383-TiITARs.A054 | contig003909-ZebTAR.A003  | 0.324 | 0.990 | 0.327 |
| contig020038-BurTAR.A002  | contig058002-NyeTARs.A025 | 0.348 | 1.064 | 0.327 |
| contig041024-BurTARs.A026 | contig039640-TiITAR.A002  | 0.405 | 1.239 | 0.327 |
| contig025313-BriTAR.A002  | contig053139-ZebTARs.A023 | 0.347 | 1.063 | 0.327 |
| contig023443-TiITAR.A005  | contig022368-TiITARs.A047 | 0.363 | 1.109 | 0.327 |
| contig061091-BurTARs.A014 | contig003909-ZebTAR.A003  | 0.397 | 1.215 | 0.327 |
| contig032272-NyeTAR.A004  | contig066890-ZebTARs.A014 | 0.344 | 1.050 | 0.327 |
| contig039640-TiITAR.A002  | contig022363-TiITARs.A044 | 0.393 | 1.200 | 0.327 |
| contig025313-BriTAR.A002  | contig046007-NyeTARs.A017 | 0.382 | 1.168 | 0.327 |
| contig025313-BriTAR.A002  | contig007512-TiITARs.A024 | 0.353 | 1.079 | 0.327 |
| contig025313-BriTAR.A002  | contig056134-TiITARs.A058 | 0.348 | 1.064 | 0.327 |
| contig046007-NyeTARs.A017 | contig039639-TiITAR.A001  | 0.429 | 1.310 | 0.328 |
| contig022368-TiITARs.A046 | contig003909-ZebTAR.A003  | 0.394 | 1.203 | 0.328 |
| contig022365-TiITARs.A045 | contig040586-ZebTAR.A002  | 0.436 | 1.330 | 0.328 |
| contig022354-TiITARs.A038 | contig040586-ZebTAR.A001  | 0.428 | 1.306 | 0.328 |
| contig022362-TiITARs.A042 | contig022390-TiITARs.A055 | 0.239 | 0.729 | 0.328 |
| contig039639-TiITAR.A001  | contig022356-TiITARs.A040 | 0.424 | 1.294 | 0.328 |
| contig084876-BriTARs.A015 | contig032272-NyeTAR.A004  | 0.317 | 0.968 | 0.328 |
| contig022324-TiITARs.A027 | contig022368-TiITARs.A046 | 0.143 | 0.437 | 0.328 |
| contig020038-BurTAR.A002  | contig061410-ZebTARs.A021 | 0.311 | 0.947 | 0.328 |
| contig003909-ZebTAR.A003  | contig066890-ZebTARs.A014 | 0.344 | 1.049 | 0.328 |
| contig060292-NyeTARs.A027 | contig039640-TiITAR.A003  | 0.450 | 1.371 | 0.328 |
| contig007520-TiITARs.A025 | contig066056-ZebTARs.A017 | 0.280 | 0.853 | 0.328 |
| contig065494-BurTARs.A030 | contig062676-ZebTARs.A019 | 0.278 | 0.848 | 0.328 |
| contig084868-BriTARs.A014 | contig032272-NyeTAR.A004  | 0.328 | 1.001 | 0.328 |
| contig054630-BurTARs.A023 | contig041024-BurTARs.A026 | 0.368 | 1.121 | 0.328 |
| contig039640-TiITAR.A002  | contig053145-ZebTARs.A028 | 0.365 | 1.113 | 0.328 |
| contig038663-NyeTAR.A005  | contig022378-TiITARs.A051 | 0.364 | 1.108 | 0.328 |
| contig023443-TiITAR.A005  | contig022337-TiITARs.A031 | 0.377 | 1.148 | 0.328 |
| contig029633-BriTAR.A003  | contig056200-NyeTARs.A029 | 0.416 | 1.268 | 0.328 |
| contig023443-TiITAR.A005  | contig022349-TiITARs.A035 | 0.385 | 1.172 | 0.328 |
| contig054630-BurTARs.A023 | contig022334-TiITARs.A030 | 0.342 | 1.040 | 0.328 |
| contig086351-BriTARs.A021 | contig039642-TiITAR.A004  | 0.442 | 1.347 | 0.328 |
| contig022337-TiITARs.A031 | contig030464-ZebTARs.A025 | 0.127 | 0.387 | 0.328 |
| contig041024-BurTARs.A026 | contig053145-ZebTARs.A028 | 0.302 | 0.918 | 0.328 |
| contig038663-NyeTAR.A005  | contig022362-TiITARs.A042 | 0.416 | 1.268 | 0.328 |
| contig056020-BurTARs.A021 | contig007512-TiITARs.A024 | 0.312 | 0.949 | 0.329 |
| contig022368-TiITARs.A047 | contig022320-TiITARs.A059 | 0.115 | 0.349 | 0.329 |
| contig041024-BurTARs.A026 | contig057148-BurTARs.A028 | 0.131 | 0.398 | 0.329 |
| contig022334-TiITARs.A030 | contig040586-ZebTAR.A002  | 0.375 | 1.142 | 0.329 |
| contig023443-TiITAR.A005  | contig022354-TiITARs.A037 | 0.339 | 1.032 | 0.329 |

|                           |                           |       |       |       |
|---------------------------|---------------------------|-------|-------|-------|
| contig023443-TiITAR.A005  | contig022368-TiITARs.A046 | 0.376 | 1.144 | 0.329 |
| contig084886-BriTARs.A017 | contig040586-ZebTAR.A002  | 0.446 | 1.356 | 0.329 |
| contig060105-NyeTARs.A018 | contig056134-TiITARs.A058 | 0.295 | 0.898 | 0.329 |
| contig022330-TiITARs.A028 | contig003909-ZebTAR.A003  | 0.371 | 1.128 | 0.329 |
| contig032272-NyeTAR.A004  | contig022365-TiITARs.A045 | 0.396 | 1.202 | 0.329 |
| contig046007-NyeTARs.A017 | contig039640-TiITAR.A003  | 0.427 | 1.297 | 0.329 |
| contig057305-BurTARs.A031 | contig039640-TiITAR.A003  | 0.454 | 1.379 | 0.329 |
| contig084887-BriTARs.A018 | contig039640-TiITAR.A003  | 0.420 | 1.274 | 0.330 |
| contig032272-NyeTAR.A004  | contig022330-TiITARs.A028 | 0.371 | 1.126 | 0.330 |
| contig020038-BurTAR.A002  | contig022363-TiITARs.A043 | 0.397 | 1.205 | 0.330 |
| contig065494-BurTARs.A030 | contig060105-NyeTARs.A018 | 0.272 | 0.826 | 0.330 |
| contig045302-BurTAR.A001  | contig060292-NyeTARs.A027 | 0.446 | 1.351 | 0.330 |
| contig057148-BurTARs.A028 | contig046014-NyeTARs.A024 | 0.131 | 0.398 | 0.330 |
| contig003909-ZebTAR.A003  | contig030471-ZebTARs.A024 | 0.405 | 1.228 | 0.330 |
| contig046007-NyeTARs.A017 | contig023443-TiITAR.A005  | 0.370 | 1.120 | 0.330 |
| contig032272-NyeTAR.A004  | contig007520-TiITARs.A025 | 0.345 | 1.045 | 0.330 |
| contig022379-TiITARs.A052 | contig003909-ZebTAR.A003  | 0.326 | 0.987 | 0.330 |
| contig086344-BriTARs.A020 | contig039642-TiITAR.A004  | 0.414 | 1.254 | 0.330 |
| contig057148-BurTARs.A028 | contig040586-ZebTAR.A002  | 0.453 | 1.371 | 0.330 |
| contig060292-NyeTARs.A027 | contig040586-ZebTAR.A001  | 0.454 | 1.374 | 0.330 |
| contig022365-TiITARs.A045 | contig022320-TiITARs.A059 | 0.113 | 0.342 | 0.331 |
| contig060707-BurTARs.A015 | contig062039-NyeTARs.A022 | 0.315 | 0.953 | 0.331 |
| contig057145-BurTARs.A018 | contig038663-NyeTAR.A005  | 0.435 | 1.316 | 0.331 |
| contig023443-TiITAR.A005  | contig053139-ZebTARs.A023 | 0.350 | 1.058 | 0.331 |
| contig046014-NyeTARs.A024 | contig022341-TiITARs.A032 | 0.114 | 0.345 | 0.331 |
| contig025313-BriTAR.A002  | contig057305-BurTARs.A031 | 0.379 | 1.145 | 0.331 |
| contig084868-BriTARs.A014 | contig054630-BurTARs.A023 | 0.340 | 1.026 | 0.331 |
| contig039639-TiITAR.A001  | contig022343-TiITARs.A033 | 0.414 | 1.251 | 0.331 |
| contig023443-TiITAR.A005  | contig056134-TiITARs.A058 | 0.342 | 1.032 | 0.331 |
| contig025313-BriTAR.A002  | contig022383-TiITARs.A054 | 0.317 | 0.959 | 0.331 |
| contig045302-BurTAR.A001  | contig022365-TiITARs.A045 | 0.408 | 1.230 | 0.331 |
| contig065494-BurTARs.A030 | contig039642-TiITAR.A004  | 0.371 | 1.121 | 0.331 |
| contig055697-BurTARs.A022 | contig062676-ZebTARs.A019 | 0.282 | 0.850 | 0.331 |
| contig039642-TiITAR.A004  | contig022378-TiITARs.A051 | 0.351 | 1.061 | 0.331 |
| contig020038-BurTAR.A002  | contig049540-BurTARs.A024 | 0.355 | 1.070 | 0.331 |
| contig059766-BurTARs.A029 | contig039642-TiITAR.A004  | 0.373 | 1.126 | 0.331 |
| contig020038-BurTAR.A002  | contig046007-NyeTARs.A017 | 0.394 | 1.190 | 0.331 |
| contig086344-BriTARs.A020 | contig007512-TiITARs.A024 | 0.283 | 0.853 | 0.331 |
| contig060707-BurTARs.A015 | contig022345-TiITARs.A034 | 0.297 | 0.897 | 0.331 |
| contig039640-TiITAR.A003  | contig053145-ZebTARs.A028 | 0.371 | 1.119 | 0.331 |
| contig022368-TiITARs.A046 | contig022390-TiITARs.A055 | 0.208 | 0.627 | 0.331 |
| contig041024-BurTARs.A026 | contig022324-TiITARs.A027 | 0.142 | 0.429 | 0.332 |
| contig086351-BriTARs.A021 | contig020038-BurTAR.A002  | 0.386 | 1.166 | 0.332 |
| contig056134-TiITARs.A058 | contig003909-ZebTAR.A003  | 0.352 | 1.060 | 0.332 |
| contig039642-TiITAR.A004  | contig053139-ZebTARs.A023 | 0.395 | 1.191 | 0.332 |
| contig086337-BriTARs.A019 | contig039640-TiITAR.A003  | 0.390 | 1.176 | 0.332 |
| contig025313-BriTAR.A002  | contig046013-NyeTARs.A021 | 0.393 | 1.185 | 0.332 |
| contig025313-BriTAR.A002  | contig022390-TiITARs.A056 | 0.333 | 1.003 | 0.332 |
| contig060707-BurTARs.A015 | contig040586-ZebTAR.A002  | 0.406 | 1.225 | 0.332 |
| contig057305-BurTARs.A031 | contig040586-ZebTAR.A001  | 0.458 | 1.382 | 0.332 |
| contig060105-NyeTARs.A018 | contig066330-ZebTARs.A027 | 0.277 | 0.836 | 0.332 |
| contig020038-BurTAR.A002  | contig062676-ZebTARs.A019 | 0.322 | 0.970 | 0.332 |
| contig060105-NyeTARs.A018 | contig039639-TiITAR.A001  | 0.411 | 1.239 | 0.332 |

|                           |                           |       |       |       |
|---------------------------|---------------------------|-------|-------|-------|
| contig086337-BriTARs.A019 | contig039639-TiITAR.A001  | 0.401 | 1.209 | 0.332 |
| contig062676-ZebTARs.A019 | contig066330-ZebTARs.A027 | 0.280 | 0.843 | 0.332 |
| contig020038-BurTAR.A002  | contig007524-TiITARs.A026 | 0.359 | 1.081 | 0.332 |
| contig022324-TiITARs.A027 | contig022320-TiITARs.A059 | 0.140 | 0.421 | 0.332 |
| contig041024-BurTARs.A026 | contig059766-BurTARs.A029 | 0.306 | 0.920 | 0.332 |
| contig022334-TiITARs.A030 | contig059768-ZebTARs.A022 | 0.335 | 1.008 | 0.332 |
| contig059766-BurTARs.A029 | contig032272-NyeTAR.A004  | 0.340 | 1.024 | 0.332 |
| contig022377-TiITARs.A050 | contig022320-TiITARs.A059 | 0.125 | 0.376 | 0.333 |
| contig046014-NyeTARs.A024 | contig059768-ZebTARs.A022 | 0.363 | 1.093 | 0.333 |
| contig061091-BurTARs.A014 | contig032272-NyeTAR.A004  | 0.397 | 1.195 | 0.333 |
| contig032272-NyeTAR.A004  | contig022379-TiITARs.A052 | 0.325 | 0.977 | 0.333 |
| contig084887-BriTARs.A018 | contig065494-BurTARs.A030 | 0.319 | 0.958 | 0.333 |
| contig025313-BriTAR.A002  | contig022349-TiITARs.A035 | 0.397 | 1.194 | 0.333 |
| contig032272-NyeTAR.A004  | contig053145-ZebTARs.A028 | 0.345 | 1.036 | 0.333 |
| contig065494-BurTARs.A030 | contig053145-ZebTARs.A028 | 0.011 | 0.034 | 0.333 |
| contig007520-TiITARs.A025 | contig003909-ZebTAR.A003  | 0.347 | 1.043 | 0.333 |
| contig039642-TiITAR.A004  | contig066330-ZebTARs.A027 | 0.376 | 1.130 | 0.333 |
| contig029633-BriTAR.A003  | contig049540-BurTARs.A024 | 0.412 | 1.239 | 0.333 |
| contig032272-NyeTAR.A004  | contig022368-TiITARs.A046 | 0.394 | 1.183 | 0.333 |
| contig045302-BurTAR.A001  | contig057305-BurTARs.A031 | 0.453 | 1.359 | 0.333 |
| contig003909-ZebTAR.A003  | contig066330-ZebTARs.A027 | 0.354 | 1.062 | 0.333 |
| contig039640-TiITAR.A002  | contig053139-ZebTARs.A023 | 0.389 | 1.167 | 0.333 |
| contig056134-TiITARs.A058 | contig062676-ZebTARs.A019 | 0.294 | 0.882 | 0.333 |
| contig039639-TiITAR.A001  | contig066285-ZebTARs.A016 | 0.431 | 1.294 | 0.333 |
| contig020038-BurTAR.A002  | contig057305-BurTARs.A031 | 0.389 | 1.166 | 0.333 |
| contig049534-BurTARs.A025 | contig022345-TiITARs.A034 | 0.149 | 0.446 | 0.333 |
| contig086344-BriTARs.A020 | contig062039-NyeTARs.A022 | 0.323 | 0.969 | 0.333 |
| contig039639-TiITAR.A001  | contig022377-TiITARs.A050 | 0.417 | 1.251 | 0.333 |
| contig086344-BriTARs.A020 | contig039640-TiITAR.A002  | 0.426 | 1.278 | 0.333 |
| contig065494-BurTARs.A030 | contig003909-ZebTAR.A003  | 0.347 | 1.040 | 0.333 |
| contig060707-BurTARs.A015 | contig023443-TiITAR.A005  | 0.331 | 0.992 | 0.334 |
| contig025313-BriTAR.A002  | contig007520-TiITARs.A025 | 0.340 | 1.018 | 0.334 |
| contig022345-TiITARs.A034 | contig022377-TiITARs.A050 | 0.136 | 0.406 | 0.334 |
| contig007520-TiITARs.A025 | contig056134-TiITARs.A058 | 0.254 | 0.762 | 0.334 |
| contig022356-TiITARs.A040 | contig040586-ZebTAR.A002  | 0.425 | 1.274 | 0.334 |
| contig025313-BriTAR.A002  | contig066330-ZebTARs.A027 | 0.351 | 1.050 | 0.334 |
| contig022362-TiITARs.A042 | contig003909-ZebTAR.A003  | 0.378 | 1.133 | 0.334 |
| contig046010-NyeTARs.A019 | contig022320-TiITARs.A059 | 0.125 | 0.374 | 0.334 |
| contig041024-BurTARs.A026 | contig022356-TiITARs.A040 | 0.100 | 0.298 | 0.334 |
| contig039642-TiITAR.A004  | contig022354-TiITARs.A037 | 0.384 | 1.151 | 0.334 |
| contig055697-BurTARs.A022 | contig022378-TiITARs.A051 | 0.279 | 0.835 | 0.334 |
| contig025313-BriTAR.A002  | contig065494-BurTARs.A030 | 0.344 | 1.029 | 0.334 |
| contig025313-BriTAR.A002  | contig022375-TiITARs.A048 | 0.359 | 1.076 | 0.334 |
| contig020038-BurTAR.A002  | contig066890-ZebTARs.A014 | 0.344 | 1.031 | 0.334 |
| contig020038-BurTAR.A002  | contig053139-ZebTARs.A023 | 0.352 | 1.053 | 0.334 |
| contig065494-BurTARs.A030 | contig039640-TiITAR.A002  | 0.366 | 1.095 | 0.334 |
| contig055697-BurTARs.A022 | contig022368-TiITARs.A047 | 0.319 | 0.954 | 0.334 |
| contig059766-BurTARs.A029 | contig039640-TiITAR.A002  | 0.368 | 1.100 | 0.334 |
| contig032272-NyeTAR.A004  | contig022362-TiITARs.A042 | 0.378 | 1.131 | 0.334 |
| contig086344-BriTARs.A020 | contig022345-TiITARs.A034 | 0.298 | 0.891 | 0.334 |
| contig032272-NyeTAR.A004  | contig022334-TiITARs.A029 | 0.375 | 1.121 | 0.334 |
| contig084887-BriTARs.A018 | contig003909-ZebTAR.A003  | 0.393 | 1.175 | 0.334 |
| contig041024-BurTARs.A026 | contig056134-TiITARs.A058 | 0.320 | 0.957 | 0.334 |

|                           |                           |       |       |       |
|---------------------------|---------------------------|-------|-------|-------|
| contig007524-TiITARs.A026 | contig056134-TiITARs.A058 | 0.261 | 0.779 | 0.335 |
| contig046013-NyeTARs.A021 | contig003909-ZebTAR.A003  | 0.403 | 1.204 | 0.335 |
| contig020038-BurTAR.A002  | contig059766-BurTARs.A029 | 0.341 | 1.019 | 0.335 |
| contig029633-BriTAR.A003  | contig062677-ZebTARs.A018 | 0.415 | 1.240 | 0.335 |
| contig039639-TiITAR.A001  | contig030471-ZebTARs.A024 | 0.434 | 1.298 | 0.335 |
| contig025313-BriTAR.A002  | contig022354-TiITARs.A038 | 0.368 | 1.099 | 0.335 |
| contig084868-BriTARs.A014 | contig059768-ZebTARs.A022 | 0.333 | 0.995 | 0.335 |
| contig022362-TiITARs.A042 | contig040586-ZebTAR.A002  | 0.424 | 1.266 | 0.335 |
| contig023443-TiITAR.A005  | contig007520-TiITARs.A025 | 0.334 | 0.997 | 0.335 |
| contig066285-ZebTARs.A016 | contig030471-ZebTARs.A024 | 0.138 | 0.411 | 0.335 |
| contig056020-BurTARs.A021 | contig023443-TiITAR.A005  | 0.366 | 1.091 | 0.335 |
| contig039639-TiITAR.A001  | contig007524-TiITARs.A026 | 0.432 | 1.290 | 0.335 |
| contig084887-BriTARs.A018 | contig066330-ZebTARs.A027 | 0.324 | 0.966 | 0.335 |
| contig060707-BurTARs.A015 | contig039640-TiITAR.A003  | 0.403 | 1.203 | 0.335 |
| contig020038-BurTAR.A002  | contig053145-ZebTARs.A028 | 0.346 | 1.032 | 0.335 |
| contig041024-BurTARs.A026 | contig022377-TiITARs.A050 | 0.121 | 0.363 | 0.335 |
| contig022334-TiITARs.A029 | contig003909-ZebTAR.A003  | 0.375 | 1.119 | 0.335 |
| contig032272-NyeTAR.A004  | contig022383-TiITARs.A054 | 0.323 | 0.965 | 0.335 |
| contig003909-ZebTAR.A003  | contig066691-ZebTARs.A015 | 0.402 | 1.199 | 0.335 |
| contig020038-BurTAR.A002  | contig061091-BurTARs.A014 | 0.402 | 1.199 | 0.335 |
| contig039640-TiITAR.A003  | contig022363-TiITARs.A044 | 0.393 | 1.172 | 0.335 |
| contig056020-BurTARs.A021 | contig055697-BurTARs.A022 | 0.304 | 0.905 | 0.335 |
| contig032272-NyeTAR.A004  | contig030471-ZebTARs.A024 | 0.405 | 1.207 | 0.336 |
| contig039640-TiITAR.A002  | contig022365-TiITARs.A045 | 0.419 | 1.249 | 0.336 |
| contig020038-BurTAR.A002  | contig022368-TiITARs.A046 | 0.399 | 1.187 | 0.336 |
| contig039639-TiITAR.A001  | contig007520-TiITARs.A025 | 0.425 | 1.267 | 0.336 |
| contig039640-TiITAR.A002  | contig066330-ZebTARs.A027 | 0.371 | 1.104 | 0.336 |
| contig025313-BriTAR.A002  | contig060292-NyeTARs.A027 | 0.379 | 1.128 | 0.336 |
| contig084868-BriTARs.A014 | contig020038-BurTAR.A002  | 0.330 | 0.981 | 0.336 |
| contig056020-BurTARs.A021 | contig022320-TiITARs.A059 | 0.106 | 0.315 | 0.336 |
| contig049534-BurTARs.A025 | contig030471-ZebTARs.A024 | 0.137 | 0.406 | 0.336 |
| contig007512-TiITARs.A024 | contig030445-ZebTARs.A026 | 0.264 | 0.785 | 0.336 |
| contig023443-TiITAR.A005  | contig022363-TiITARs.A043 | 0.390 | 1.161 | 0.336 |
| contig022355-TiITARs.A039 | contig022390-TiITARs.A055 | 0.222 | 0.661 | 0.336 |
| contig039640-TiITAR.A002  | contig022349-TiITARs.A035 | 0.426 | 1.266 | 0.336 |
| contig039639-TiITAR.A001  | contig056134-TiITARs.A058 | 0.373 | 1.108 | 0.337 |
| contig025313-BriTAR.A002  | contig022337-TiITARs.A031 | 0.389 | 1.155 | 0.337 |
| contig084887-BriTARs.A018 | contig059766-BurTARs.A029 | 0.320 | 0.951 | 0.337 |
| contig060105-NyeTARs.A018 | contig066056-ZebTARs.A017 | 0.017 | 0.051 | 0.337 |
| contig041024-BurTARs.A026 | contig022345-TiITARs.A034 | 0.112 | 0.333 | 0.337 |
| contig039640-TiITAR.A002  | contig022368-TiITARs.A046 | 0.413 | 1.227 | 0.337 |
| contig029633-BriTAR.A003  | contig086351-BriTARs.A021 | 0.451 | 1.338 | 0.337 |
| contig086351-BriTARs.A021 | contig038663-NyeTAR.A005  | 0.444 | 1.319 | 0.337 |
| contig025313-BriTAR.A002  | contig086344-BriTARs.A020 | 0.339 | 1.007 | 0.337 |
| contig060707-BurTARs.A015 | contig040586-ZebTAR.A001  | 0.423 | 1.254 | 0.337 |
| contig022320-TiITARs.A059 | contig059768-ZebTARs.A022 | 0.370 | 1.098 | 0.337 |
| contig056200-NyeTARs.A029 | contig040586-ZebTAR.A002  | 0.407 | 1.206 | 0.337 |
| contig086337-BriTARs.A019 | contig022354-TiITARs.A037 | 0.311 | 0.922 | 0.337 |
| contig020038-BurTAR.A002  | contig022330-TiITARs.A028 | 0.376 | 1.113 | 0.337 |
| contig039640-TiITAR.A002  | contig007512-TiITARs.A024 | 0.397 | 1.176 | 0.337 |
| contig025313-BriTAR.A002  | contig060105-NyeTARs.A018 | 0.332 | 0.984 | 0.337 |
| contig039642-TiITAR.A004  | contig022356-TiITARs.A040 | 0.416 | 1.234 | 0.337 |
| contig022320-TiITARs.A059 | contig066285-ZebTARs.A016 | 0.139 | 0.411 | 0.337 |

|                           |                           |       |       |       |
|---------------------------|---------------------------|-------|-------|-------|
| contig057148-BurTARs.A028 | contig023443-TiITAR.A005  | 0.359 | 1.063 | 0.337 |
| contig022354-TiITARs.A037 | contig040586-ZebTAR.A002  | 0.397 | 1.175 | 0.337 |
| contig084887-BriTARs.A018 | contig053145-ZebTARs.A028 | 0.323 | 0.957 | 0.337 |
| contig022368-TiITARs.A046 | contig022320-TiITARs.A059 | 0.106 | 0.314 | 0.338 |
| contig022341-TiITARs.A032 | contig022357-TiITARs.A041 | 0.126 | 0.375 | 0.338 |
| contig032272-NyeTAR.A004  | contig022349-TiITARs.A035 | 0.406 | 1.203 | 0.338 |
| contig029633-BriTAR.A003  | contig086344-BriTARs.A020 | 0.430 | 1.274 | 0.338 |
| contig039640-TiITAR.A002  | contig022356-TiITARs.A040 | 0.417 | 1.234 | 0.338 |
| contig059766-BurTARs.A029 | contig039640-TiITAR.A003  | 0.373 | 1.105 | 0.338 |
| contig056020-BurTARs.A021 | contig066285-ZebTARs.A016 | 0.151 | 0.448 | 0.338 |
| contig055697-BurTARs.A022 | contig032272-NyeTAR.A004  | 0.354 | 1.049 | 0.338 |
| contig054630-BurTARs.A023 | contig046014-NyeTARs.A024 | 0.370 | 1.095 | 0.338 |
| contig056020-BurTARs.A021 | contig022324-TiITARs.A027 | 0.151 | 0.448 | 0.338 |
| contig039639-TiITAR.A001  | contig022330-TiITARs.A028 | 0.406 | 1.203 | 0.338 |
| contig046010-NyeTARs.A019 | contig022324-TiITARs.A027 | 0.154 | 0.456 | 0.338 |
| contig022375-TiITARs.A048 | contig003909-ZebTAR.A003  | 0.367 | 1.087 | 0.338 |
| contig056021-BurTARs.A020 | contig022324-TiITARs.A027 | 0.142 | 0.420 | 0.338 |
| contig022345-TiITARs.A034 | contig066285-ZebTARs.A016 | 0.153 | 0.452 | 0.338 |
| contig020038-BurTAR.A002  | contig030471-ZebTARs.A024 | 0.410 | 1.212 | 0.338 |
| contig058002-NyeTARs.A025 | contig066056-ZebTARs.A017 | 0.289 | 0.854 | 0.338 |
| contig022365-TiITARs.A045 | contig040586-ZebTAR.A001  | 0.421 | 1.246 | 0.338 |
| contig046014-NyeTARs.A024 | contig022355-TiITARs.A039 | 0.098 | 0.289 | 0.338 |
| contig020038-BurTAR.A002  | contig007512-TiITARs.A024 | 0.357 | 1.056 | 0.338 |
| contig057148-BurTARs.A028 | contig022343-TiITARs.A033 | 0.125 | 0.371 | 0.338 |
| contig039640-TiITAR.A003  | contig022343-TiITARs.A033 | 0.409 | 1.208 | 0.338 |
| contig020038-BurTAR.A002  | contig060292-NyeTARs.A027 | 0.389 | 1.149 | 0.338 |
| contig039639-TiITAR.A001  | contig022355-TiITARs.A039 | 0.430 | 1.271 | 0.339 |
| contig022353-TiITARs.A036 | contig003909-ZebTAR.A003  | 0.391 | 1.154 | 0.339 |
| contig039640-TiITAR.A003  | contig022341-TiITARs.A032 | 0.408 | 1.206 | 0.339 |
| contig049534-BurTARs.A025 | contig022320-TiITARs.A059 | 0.138 | 0.407 | 0.339 |
| contig022334-TiITARs.A030 | contig040586-ZebTAR.A001  | 0.371 | 1.096 | 0.339 |
| contig041024-BurTARs.A026 | contig046010-NyeTARs.A019 | 0.129 | 0.381 | 0.339 |
| contig084887-BriTARs.A018 | contig040586-ZebTAR.A002  | 0.432 | 1.274 | 0.339 |
| contig039640-TiITAR.A002  | contig022337-TiITARs.A031 | 0.427 | 1.260 | 0.339 |
| contig046010-NyeTARs.A019 | contig022343-TiITARs.A033 | 0.122 | 0.360 | 0.339 |
| contig049534-BurTARs.A025 | contig039639-TiITAR.A001  | 0.436 | 1.287 | 0.339 |
| contig039640-TiITAR.A003  | contig022330-TiITARs.A028 | 0.404 | 1.192 | 0.339 |
| contig041024-BurTARs.A026 | contig039642-TiITAR.A004  | 0.407 | 1.200 | 0.339 |
| contig020038-BurTAR.A002  | contig022349-TiITARs.A035 | 0.404 | 1.189 | 0.339 |
| contig022368-TiITARs.A046 | contig040586-ZebTAR.A002  | 0.428 | 1.260 | 0.339 |
| contig039640-TiITAR.A002  | contig022330-TiITARs.A028 | 0.403 | 1.188 | 0.340 |
| contig046014-NyeTARs.A024 | contig066285-ZebTARs.A016 | 0.131 | 0.387 | 0.340 |
| contig020038-BurTAR.A002  | contig007520-TiITARs.A025 | 0.343 | 1.011 | 0.340 |
| contig039642-TiITAR.A004  | contig007512-TiITARs.A024 | 0.396 | 1.164 | 0.340 |
| contig032272-NyeTAR.A004  | contig022356-TiITARs.A040 | 0.368 | 1.083 | 0.340 |
| contig060707-BurTARs.A015 | contig038663-NyeTAR.A005  | 0.425 | 1.251 | 0.340 |
| contig022353-TiITARs.A036 | contig053145-ZebTARs.A028 | 0.309 | 0.908 | 0.340 |
| contig046010-NyeTARs.A019 | contig046014-NyeTARs.A024 | 0.130 | 0.381 | 0.340 |
| contig045302-BurTAR.A001  | contig022363-TiITARs.A043 | 0.434 | 1.277 | 0.340 |
| contig032272-NyeTAR.A004  | contig046013-NyeTARs.A021 | 0.403 | 1.184 | 0.340 |
| contig022383-TiITARs.A054 | contig053145-ZebTARs.A028 | 0.278 | 0.817 | 0.340 |
| contig039640-TiITAR.A003  | contig022320-TiITARs.A059 | 0.421 | 1.236 | 0.340 |
| contig084876-BriTARs.A015 | contig020038-BurTAR.A002  | 0.323 | 0.949 | 0.340 |



|                           |                           |       |       |       |
|---------------------------|---------------------------|-------|-------|-------|
| contig025313-BriTAR.A002  | contig057148-BurTARs.A028 | 0.375 | 1.102 | 0.340 |
| contig039639-TiITAR.A001  | contig022368-TiITARs.A047 | 0.417 | 1.224 | 0.340 |
| contig038663-NyeTAR.A005  | contig022354-TiITARs.A038 | 0.440 | 1.294 | 0.340 |
| contig045302-BurTAR.A001  | contig022334-TiITARs.A030 | 0.370 | 1.087 | 0.340 |
| contig060707-BurTARs.A015 | contig003909-ZebTAR.A003  | 0.340 | 0.997 | 0.340 |
| contig057145-BurTARs.A018 | contig022354-TiITARs.A037 | 0.157 | 0.460 | 0.340 |
| contig053139-ZebTARs.A023 | contig030445-ZebTARs.A026 | 0.259 | 0.762 | 0.341 |
| contig039640-TiITAR.A003  | contig022355-TiITARs.A039 | 0.427 | 1.252 | 0.341 |
| contig060707-BurTARs.A015 | contig032272-NyeTAR.A004  | 0.341 | 1.001 | 0.341 |
| contig022378-TiITARs.A051 | contig053139-ZebTARs.A023 | 0.284 | 0.835 | 0.341 |
| contig056134-TiITARs.A058 | contig053145-ZebTARs.A028 | 0.063 | 0.184 | 0.341 |
| contig032272-NyeTAR.A004  | contig066691-ZebTARs.A015 | 0.402 | 1.179 | 0.341 |
| contig022353-TiITARs.A036 | contig040586-ZebTAR.A002  | 0.415 | 1.219 | 0.341 |
| contig049534-BurTARs.A025 | contig046014-NyeTARs.A024 | 0.131 | 0.383 | 0.341 |
| contig046010-NyeTARs.A019 | contig022390-TiITARs.A055 | 0.201 | 0.589 | 0.341 |
| contig057148-BurTARs.A028 | contig022390-TiITARs.A055 | 0.201 | 0.589 | 0.341 |
| contig059673-BurTARs.A016 | contig059768-ZebTARs.A022 | 0.369 | 1.082 | 0.341 |
| contig060292-NyeTARs.A027 | contig039642-TiITAR.A004  | 0.457 | 1.339 | 0.341 |
| contig025313-BriTAR.A002  | contig086337-BriTARs.A019 | 0.351 | 1.028 | 0.341 |
| contig066285-ZebTARs.A016 | contig053145-ZebTARs.A028 | 0.318 | 0.933 | 0.341 |
| contig045302-BurTAR.A001  | contig057148-BurTARs.A028 | 0.445 | 1.305 | 0.341 |
| contig046010-NyeTARs.A019 | contig040586-ZebTAR.A002  | 0.457 | 1.340 | 0.341 |
| contig023443-TiITAR.A005  | contig007518-TiITARs.A019 | 0.380 | 1.112 | 0.341 |
| contig086337-BriTARs.A019 | contig023443-TiITAR.A005  | 0.349 | 1.024 | 0.341 |
| contig039640-TiITAR.A003  | contig022377-TiITARs.A050 | 0.410 | 1.202 | 0.341 |
| contig022354-TiITARs.A038 | contig003909-ZebTAR.A003  | 0.370 | 1.084 | 0.341 |
| contig023443-TiITAR.A005  | contig022390-TiITARs.A056 | 0.329 | 0.965 | 0.341 |
| contig055697-BurTARs.A022 | contig022354-TiITARs.A037 | 0.312 | 0.914 | 0.341 |
| contig056020-BurTARs.A021 | contig053139-ZebTARs.A023 | 0.305 | 0.894 | 0.341 |
| contig023443-TiITAR.A005  | contig022343-TiITARs.A033 | 0.362 | 1.060 | 0.341 |
| contig084886-BriTARs.A017 | contig022320-TiITARs.A059 | 0.129 | 0.377 | 0.341 |
| contig038663-NyeTAR.A005  | contig022363-TiITARs.A043 | 0.441 | 1.291 | 0.341 |
| contig045302-BurTAR.A001  | contig060707-BurTARs.A015 | 0.420 | 1.231 | 0.341 |
| contig086337-BriTARs.A019 | contig003909-ZebTAR.A003  | 0.354 | 1.038 | 0.341 |
| contig060105-NyeTARs.A018 | contig039640-TiITAR.A002  | 0.420 | 1.229 | 0.342 |
| contig059673-BurTARs.A016 | contig056134-TiITARs.A058 | 0.282 | 0.825 | 0.342 |
| contig022390-TiITARs.A055 | contig003909-ZebTAR.A003  | 0.370 | 1.082 | 0.342 |
| contig032272-NyeTAR.A004  | contig022390-TiITARs.A055 | 0.370 | 1.082 | 0.342 |
| contig056020-BurTARs.A021 | contig059766-BurTARs.A029 | 0.311 | 0.912 | 0.342 |
| contig086337-BriTARs.A019 | contig032272-NyeTAR.A004  | 0.356 | 1.042 | 0.342 |
| contig057145-BurTARs.A018 | contig022334-TiITARs.A029 | 0.102 | 0.299 | 0.342 |
| contig049540-BurTARs.A024 | contig040586-ZebTAR.A002  | 0.403 | 1.179 | 0.342 |
| contig058002-NyeTARs.A025 | contig039640-TiITAR.A003  | 0.420 | 1.230 | 0.342 |
| contig056020-BurTARs.A021 | contig040586-ZebTAR.A002  | 0.447 | 1.309 | 0.342 |
| contig041024-BurTARs.A026 | contig022355-TiITARs.A039 | 0.099 | 0.289 | 0.342 |
| contig062676-ZebTARs.A019 | contig053139-ZebTARs.A023 | 0.282 | 0.825 | 0.342 |
| contig022368-TiITARs.A047 | contig053139-ZebTARs.A023 | 0.318 | 0.930 | 0.342 |
| contig038663-NyeTAR.A005  | contig022334-TiITARs.A030 | 0.374 | 1.093 | 0.342 |
| contig057148-BurTARs.A028 | contig022324-TiITARs.A027 | 0.158 | 0.461 | 0.342 |
| contig045302-BurTAR.A001  | contig022368-TiITARs.A046 | 0.416 | 1.216 | 0.342 |
| contig059766-BurTARs.A029 | contig022383-TiITARs.A054 | 0.280 | 0.819 | 0.342 |
| contig055697-BurTARs.A022 | contig035377-NyeTARs.A023 | 0.287 | 0.838 | 0.342 |
| contig022390-TiITARs.A055 | contig030471-ZebTARs.A024 | 0.187 | 0.547 | 0.342 |

|                           |                           |       |       |       |
|---------------------------|---------------------------|-------|-------|-------|
| contig041024-BurTARs.A026 | contig022390-TiITARs.A055 | 0.187 | 0.547 | 0.342 |
| contig020038-BurTAR.A002  | contig022334-TiITARs.A029 | 0.379 | 1.108 | 0.342 |
| contig023443-TiITAR.A005  | contig022354-TiITARs.A038 | 0.361 | 1.054 | 0.342 |
| contig054630-BurTARs.A023 | contig022320-TiITARs.A059 | 0.377 | 1.100 | 0.342 |
| contig020038-BurTAR.A002  | contig022362-TiITARs.A042 | 0.383 | 1.118 | 0.342 |
| contig022349-TiITARs.A035 | contig003909-ZebTAR.A003  | 0.406 | 1.186 | 0.342 |
| contig056020-BurTARs.A021 | contig065494-BurTARs.A030 | 0.310 | 0.906 | 0.342 |
| contig056020-BurTARs.A021 | contig053145-ZebTARs.A028 | 0.312 | 0.910 | 0.342 |
| contig057305-BurTARs.A031 | contig039642-TiITAR.A004  | 0.461 | 1.347 | 0.342 |
| contig045302-BurTAR.A001  | contig041024-BurTARs.A026 | 0.417 | 1.219 | 0.342 |
| contig056020-BurTARs.A021 | contig039642-TiITAR.A004  | 0.439 | 1.282 | 0.342 |
| contig065494-BurTARs.A030 | contig039640-TiITAR.A003  | 0.372 | 1.085 | 0.342 |
| contig056020-BurTARs.A021 | contig049534-BurTARs.A025 | 0.148 | 0.432 | 0.343 |
| contig060105-NyeTARs.A018 | contig007512-TiITARs.A024 | 0.278 | 0.811 | 0.343 |
| contig041024-BurTARs.A026 | contig065494-BurTARs.A030 | 0.313 | 0.914 | 0.343 |
| contig025313-BriTAR.A002  | contig084887-BriTARs.A018 | 0.419 | 1.223 | 0.343 |
| contig022353-TiITARs.A036 | contig066330-ZebTARs.A027 | 0.315 | 0.920 | 0.343 |
| contig020038-BurTAR.A002  | contig046013-NyeTARs.A021 | 0.407 | 1.189 | 0.343 |
| contig046014-NyeTARs.A024 | contig053145-ZebTARs.A028 | 0.306 | 0.894 | 0.343 |
| contig041024-BurTARs.A026 | contig040586-ZebTAR.A002  | 0.414 | 1.209 | 0.343 |
| contig029633-BriTAR.A003  | contig084886-BriTARs.A017 | 0.453 | 1.322 | 0.343 |
| contig007512-TiITARs.A024 | contig022354-TiITARs.A037 | 0.317 | 0.925 | 0.343 |
| contig060105-NyeTARs.A018 | contig039642-TiITAR.A004  | 0.408 | 1.188 | 0.343 |
| contig084886-BriTARs.A017 | contig041024-BurTARs.A026 | 0.127 | 0.369 | 0.343 |
| contig086344-BriTARs.A020 | contig023443-TiITAR.A005  | 0.341 | 0.995 | 0.343 |
| contig022337-TiITARs.A031 | contig003909-ZebTAR.A003  | 0.400 | 1.165 | 0.343 |
| contig020038-BurTAR.A002  | contig022383-TiITARs.A054 | 0.324 | 0.945 | 0.343 |
| contig039640-TiITAR.A002  | contig022341-TiITARs.A032 | 0.400 | 1.165 | 0.343 |
| contig061091-BurTARs.A014 | contig039639-TiITAR.A001  | 0.428 | 1.248 | 0.343 |
| contig084868-BriTARs.A014 | contig055697-BurTARs.A022 | 0.295 | 0.858 | 0.343 |
| contig032272-NyeTAR.A004  | contig022375-TiITARs.A048 | 0.367 | 1.070 | 0.343 |
| contig041024-BurTARs.A026 | contig030464-ZebTARs.A025 | 0.131 | 0.380 | 0.343 |
| contig025313-BriTAR.A002  | contig022343-TiITARs.A033 | 0.372 | 1.083 | 0.343 |
| contig025313-BriTAR.A002  | contig046010-NyeTARs.A019 | 0.385 | 1.120 | 0.343 |
| contig039640-TiITAR.A002  | contig022320-TiITARs.A059 | 0.413 | 1.203 | 0.343 |
| contig045302-BurTAR.A001  | contig030464-ZebTARs.A025 | 0.452 | 1.317 | 0.343 |
| contig060105-NyeTARs.A018 | contig022345-TiITARs.A034 | 0.301 | 0.876 | 0.344 |
| contig020038-BurTAR.A002  | contig066691-ZebTARs.A015 | 0.407 | 1.183 | 0.344 |
| contig039640-TiITAR.A002  | contig022377-TiITARs.A050 | 0.405 | 1.178 | 0.344 |
| contig040586-ZebTAR.A002  | contig062677-ZebTARs.A018 | 0.405 | 1.180 | 0.344 |
| contig029633-BriTAR.A003  | contig022378-TiITARs.A051 | 0.366 | 1.065 | 0.344 |
| contig032272-NyeTAR.A004  | contig022337-TiITARs.A031 | 0.400 | 1.164 | 0.344 |
| contig039640-TiITAR.A002  | contig062676-ZebTARs.A019 | 0.376 | 1.095 | 0.344 |
| contig086344-BriTARs.A020 | contig040586-ZebTAR.A002  | 0.416 | 1.209 | 0.344 |
| contig032272-NyeTAR.A004  | contig022390-TiITARs.A056 | 0.337 | 0.979 | 0.344 |
| contig086344-BriTARs.A020 | contig053145-ZebTARs.A028 | 0.276 | 0.803 | 0.344 |
| contig029633-BriTAR.A003  | contig060292-NyeTARs.A027 | 0.465 | 1.352 | 0.344 |
| contig055697-BurTARs.A022 | contig035381-NyeTARs.A015 | 0.263 | 0.765 | 0.344 |
| contig020038-BurTAR.A002  | contig022390-TiITARs.A055 | 0.362 | 1.053 | 0.344 |
| contig029633-BriTAR.A003  | contig057305-BurTARs.A031 | 0.465 | 1.352 | 0.344 |
| contig046010-NyeTARs.A019 | contig023443-TiITAR.A005  | 0.371 | 1.078 | 0.344 |
| contig022324-TiITARs.A027 | contig061417-ZebTARs.A020 | 0.157 | 0.455 | 0.344 |
| contig039640-TiITAR.A003  | contig066330-ZebTARs.A027 | 0.376 | 1.093 | 0.344 |

|                           |                           |       |       |       |
|---------------------------|---------------------------|-------|-------|-------|
| contig084887-BriTARs.A018 | contig032272-NyeTAR.A004  | 0.398 | 1.155 | 0.344 |
| contig066056-ZebTARs.A017 | contig062677-ZebTARs.A018 | 0.314 | 0.912 | 0.344 |
| contig041024-BurTARs.A026 | contig066330-ZebTARs.A027 | 0.313 | 0.909 | 0.344 |
| contig022324-TiITARs.A027 | contig022334-TiITARs.A030 | 0.202 | 0.585 | 0.344 |
| contig038663-NyeTAR.A005  | contig022365-TiITARs.A045 | 0.427 | 1.240 | 0.344 |
| contig022337-TiITARs.A031 | contig022354-TiITARs.A038 | 0.114 | 0.332 | 0.345 |
| contig022390-TiITARs.A056 | contig003909-ZebTAR.A003  | 0.337 | 0.978 | 0.345 |
| contig046014-NyeTARs.A024 | contig039640-TiITAR.A003  | 0.416 | 1.208 | 0.345 |
| contig039642-TiITAR.A004  | contig022365-TiITARs.A045 | 0.430 | 1.246 | 0.345 |
| contig056020-BurTARs.A021 | contig066330-ZebTARs.A027 | 0.312 | 0.906 | 0.345 |
| contig025313-BriTAR.A002  | contig055697-BurTARs.A022 | 0.357 | 1.035 | 0.345 |
| contig039642-TiITAR.A004  | contig022337-TiITARs.A031 | 0.436 | 1.265 | 0.345 |
| contig022356-TiITARs.A040 | contig003909-ZebTAR.A003  | 0.373 | 1.082 | 0.345 |
| contig059766-BurTARs.A029 | contig066285-ZebTARs.A016 | 0.322 | 0.935 | 0.345 |
| contig059673-BurTARs.A016 | contig058002-NyeTARs.A025 | 0.024 | 0.069 | 0.345 |
| contig022378-TiITARs.A051 | contig040586-ZebTAR.A002  | 0.357 | 1.033 | 0.345 |
| contig049534-BurTARs.A025 | contig053145-ZebTARs.A028 | 0.319 | 0.924 | 0.345 |
| contig039639-TiITAR.A001  | contig022334-TiITARs.A029 | 0.416 | 1.206 | 0.345 |
| contig029633-BriTAR.A003  | contig022354-TiITARs.A037 | 0.401 | 1.162 | 0.345 |
| contig022324-TiITARs.A027 | contig022368-TiITARs.A047 | 0.158 | 0.457 | 0.345 |
| contig020038-BurTAR.A002  | contig022379-TiITARs.A052 | 0.331 | 0.958 | 0.345 |
| contig061433-BurTARs.A013 | contig022368-TiITARs.A046 | 0.152 | 0.441 | 0.345 |
| contig086344-BriTARs.A020 | contig059766-BurTARs.A029 | 0.274 | 0.793 | 0.345 |
| contig058002-NyeTARs.A025 | contig039640-TiITAR.A002  | 0.428 | 1.238 | 0.345 |
| contig055697-BurTARs.A022 | contig040586-ZebTAR.A001  | 0.406 | 1.175 | 0.346 |
| contig032272-NyeTAR.A004  | contig066330-ZebTARs.A027 | 0.356 | 1.031 | 0.346 |
| contig046007-NyeTARs.A017 | contig039642-TiITAR.A004  | 0.433 | 1.253 | 0.346 |
| contig022324-TiITARs.A027 | contig022363-TiITARs.A043 | 0.194 | 0.562 | 0.346 |
| contig046013-NyeTARs.A021 | contig039639-TiITAR.A001  | 0.434 | 1.256 | 0.346 |
| contig062039-NyeTARs.A022 | contig066056-ZebTARs.A017 | 0.319 | 0.923 | 0.346 |
| contig065494-BurTARs.A030 | contig032272-NyeTAR.A004  | 0.349 | 1.010 | 0.346 |
| contig022345-TiITARs.A034 | contig022354-TiITARs.A037 | 0.157 | 0.453 | 0.346 |
| contig029633-BriTAR.A003  | contig060105-NyeTARs.A018 | 0.424 | 1.225 | 0.346 |
| contig055697-BurTARs.A022 | contig035376-NyeTARs.A014 | 0.264 | 0.763 | 0.346 |
| contig061977-BurTARs.A012 | contig039640-TiITAR.A002  | 0.381 | 1.103 | 0.346 |
| contig007512-TiITARs.A024 | contig022368-TiITARs.A047 | 0.335 | 0.968 | 0.346 |
| contig039640-TiITAR.A002  | contig022343-TiITARs.A033 | 0.405 | 1.170 | 0.346 |
| contig025313-BriTAR.A002  | contig030464-ZebTARs.A025 | 0.387 | 1.119 | 0.346 |
| contig022354-TiITARs.A037 | contig053139-ZebTARs.A023 | 0.315 | 0.909 | 0.346 |
| contig038663-NyeTAR.A005  | contig060292-NyeTARs.A027 | 0.461 | 1.333 | 0.346 |
| contig046014-NyeTARs.A024 | contig039640-TiITAR.A002  | 0.410 | 1.185 | 0.346 |
| contig057145-BurTARs.A018 | contig022363-TiITARs.A043 | 0.155 | 0.449 | 0.346 |
| contig055697-BurTARs.A022 | contig003909-ZebTAR.A003  | 0.352 | 1.018 | 0.346 |
| contig020038-BurTAR.A002  | contig056134-TiITARs.A058 | 0.355 | 1.025 | 0.346 |
| contig020038-BurTAR.A002  | contig022375-TiITARs.A048 | 0.372 | 1.073 | 0.346 |
| contig025313-BriTAR.A002  | contig022390-TiITARs.A055 | 0.381 | 1.100 | 0.346 |
| contig022354-TiITARs.A037 | contig040586-ZebTAR.A001  | 0.398 | 1.148 | 0.346 |
| contig025313-BriTAR.A002  | contig056020-BurTARs.A021 | 0.408 | 1.177 | 0.347 |
| contig022341-TiITARs.A032 | contig022365-TiITARs.A045 | 0.133 | 0.384 | 0.347 |
| contig022379-TiITARs.A052 | contig066056-ZebTARs.A017 | 0.298 | 0.860 | 0.347 |
| contig086337-BriTARs.A019 | contig030445-ZebTARs.A026 | 0.263 | 0.758 | 0.347 |
| contig045302-BurTAR.A001  | contig055697-BurTARs.A022 | 0.412 | 1.188 | 0.347 |
| contig059766-BurTARs.A029 | contig046014-NyeTARs.A024 | 0.311 | 0.895 | 0.347 |

|                           |                           |       |       |       |
|---------------------------|---------------------------|-------|-------|-------|
| contig045302-BurTARs.A001 | contig007512-TiITARs.A024 | 0.407 | 1.174 | 0.347 |
| contig061091-BurTARs.A014 | contig039640-TiITAR.A003  | 0.424 | 1.220 | 0.347 |
| contig007512-TiITARs.A024 | contig022390-TiITARs.A055 | 0.293 | 0.845 | 0.347 |
| contig049534-BurTARs.A025 | contig022341-TiITARs.A032 | 0.157 | 0.454 | 0.347 |
| contig029633-BriTAR.A003  | contig022382-TiITARs.A053 | 0.424 | 1.222 | 0.347 |
| contig084887-BriTARs.A018 | contig020038-BurTAR.A002  | 0.402 | 1.159 | 0.347 |
| contig035377-NyeTARs.A023 | contig053139-ZebTARs.A023 | 0.288 | 0.830 | 0.347 |
| contig046007-NyeTARs.A017 | contig066285-ZebTARs.A016 | 0.155 | 0.446 | 0.347 |
| contig084887-BriTARs.A018 | contig040586-ZebTAR.A001  | 0.436 | 1.256 | 0.347 |
| contig020038-BurTAR.A002  | contig022337-TiITARs.A031 | 0.400 | 1.150 | 0.347 |
| contig058002-NyeTARs.A025 | contig007524-TiITARs.A026 | 0.031 | 0.090 | 0.347 |
| contig057305-BurTARs.A031 | contig038663-NyeTAR.A005  | 0.466 | 1.340 | 0.347 |
| contig086337-BriTARs.A019 | contig022368-TiITARs.A047 | 0.317 | 0.913 | 0.348 |
| contig059673-BurTARs.A016 | contig054630-BurTARs.A023 | 0.376 | 1.082 | 0.348 |
| contig045302-BurTAR.A001  | contig022362-TiITARs.A042 | 0.420 | 1.209 | 0.348 |
| contig086337-BriTARs.A019 | contig022378-TiITARs.A051 | 0.286 | 0.821 | 0.348 |
| contig039639-TiITAR.A001  | contig022345-TiITARs.A034 | 0.401 | 1.153 | 0.348 |
| contig084868-BriTARs.A014 | contig053139-ZebTARs.A023 | 0.290 | 0.832 | 0.348 |
| contig025313-BriTAR.A002  | contig022353-TiITARs.A036 | 0.413 | 1.189 | 0.348 |
| contig086337-BriTARs.A019 | contig046014-NyeTARs.A024 | 0.318 | 0.915 | 0.348 |
| contig054630-BurTARs.A023 | contig022354-TiITARs.A037 | 0.341 | 0.980 | 0.348 |
| contig020038-BurTAR.A002  | contig066330-ZebTARs.A027 | 0.357 | 1.026 | 0.348 |
| contig020038-BurTAR.A002  | contig022356-TiITARs.A040 | 0.373 | 1.071 | 0.348 |
| contig039640-TiITAR.A003  | contig022334-TiITARs.A029 | 0.415 | 1.192 | 0.348 |
| contig039639-TiITAR.A001  | contig022353-TiITARs.A036 | 0.452 | 1.299 | 0.348 |
| contig032272-NyeTAR.A004  | contig022354-TiITARs.A038 | 0.374 | 1.075 | 0.348 |
| contig020038-BurTAR.A002  | contig065494-BurTARs.A030 | 0.350 | 1.006 | 0.348 |
| contig022334-TiITARs.A030 | contig022383-TiITARs.A054 | 0.229 | 0.656 | 0.348 |
| contig086337-BriTARs.A019 | contig039640-TiITAR.A002  | 0.393 | 1.128 | 0.348 |
| contig056021-BurTARs.A020 | contig022356-TiITARs.A040 | 0.096 | 0.275 | 0.348 |
| contig086344-BriTARs.A020 | contig056134-TiITARs.A058 | 0.303 | 0.869 | 0.348 |
| contig039639-TiITAR.A001  | contig061417-ZebTARs.A020 | 0.408 | 1.171 | 0.348 |
| contig039640-TiITAR.A002  | contig022334-TiITARs.A029 | 0.414 | 1.188 | 0.348 |
| contig022324-TiITARs.A027 | contig022345-TiITARs.A034 | 0.164 | 0.470 | 0.348 |
| contig060105-NyeTARs.A018 | contig023443-TiITAR.A005  | 0.334 | 0.958 | 0.348 |
| contig022341-TiITARs.A032 | contig030471-ZebTARs.A024 | 0.133 | 0.382 | 0.348 |
| contig022320-TiITARs.A059 | contig030464-ZebTARs.A025 | 0.131 | 0.375 | 0.348 |
| contig059766-BurTARs.A029 | contig022355-TiITARs.A039 | 0.321 | 0.922 | 0.348 |
| contig056021-BurTARs.A020 | contig039639-TiITAR.A001  | 0.408 | 1.172 | 0.349 |
| contig061433-BurTARs.A013 | contig053145-ZebTARs.A028 | 0.347 | 0.995 | 0.349 |
| contig086337-BriTARs.A019 | contig062676-ZebTARs.A019 | 0.284 | 0.815 | 0.349 |
| contig032272-NyeTAR.A004  | contig056134-TiITARs.A058 | 0.354 | 1.014 | 0.349 |
| contig022345-TiITARs.A034 | contig022382-TiITARs.A053 | 0.245 | 0.703 | 0.349 |
| contig007512-TiITARs.A024 | contig040586-ZebTAR.A001  | 0.406 | 1.163 | 0.349 |
| contig046014-NyeTARs.A024 | contig056134-TiITARs.A058 | 0.325 | 0.931 | 0.349 |
| contig049534-BurTARs.A025 | contig059766-BurTARs.A029 | 0.323 | 0.926 | 0.349 |
| contig039640-TiITAR.A003  | contig022353-TiITARs.A036 | 0.448 | 1.283 | 0.349 |
| contig086344-BriTARs.A020 | contig065494-BurTARs.A030 | 0.279 | 0.799 | 0.349 |
| contig060105-NyeTARs.A018 | contig062039-NyeTARs.A022 | 0.318 | 0.910 | 0.349 |
| contig029633-BriTAR.A003  | contig057148-BurTARs.A028 | 0.460 | 1.318 | 0.349 |
| contig057148-BurTARs.A028 | contig003909-ZebTAR.A003  | 0.379 | 1.086 | 0.349 |
| contig022345-TiITARs.A034 | contig022375-TiITARs.A048 | 0.132 | 0.377 | 0.349 |
| contig055697-BurTARs.A022 | contig046014-NyeTARs.A024 | 0.315 | 0.903 | 0.349 |

|                           |                           |       |       |       |
|---------------------------|---------------------------|-------|-------|-------|
| contig022355-TiITARs.A039 | contig053145-ZebTARs.A028 | 0.322 | 0.921 | 0.349 |
| contig058002-NyeTARs.A025 | contig056134-TiITARs.A058 | 0.264 | 0.756 | 0.349 |
| contig086344-BriTARs.A020 | contig039640-TiITAR.A003  | 0.415 | 1.187 | 0.349 |
| contig061433-BurTARs.A013 | contig022320-TiITARs.A059 | 0.141 | 0.403 | 0.349 |
| contig046007-NyeTARs.A017 | contig040586-ZebTAR.A002  | 0.446 | 1.278 | 0.349 |
| contig022368-TiITARs.A046 | contig040586-ZebTAR.A001  | 0.430 | 1.230 | 0.349 |
| contig059766-BurTARs.A029 | contig056134-TiITARs.A058 | 0.063 | 0.179 | 0.349 |
| contig039640-TiITAR.A002  | contig056134-TiITARs.A058 | 0.365 | 1.045 | 0.349 |
| contig049534-BurTARs.A025 | contig039640-TiITAR.A003  | 0.432 | 1.235 | 0.350 |
| contig082565-BriTARs.A022 | contig055697-BurTARs.A022 | 0.273 | 0.781 | 0.350 |
| contig054630-BurTARs.A023 | contig030471-ZebTARs.A024 | 0.391 | 1.118 | 0.350 |
| contig045302-BurTAR.A001  | contig046010-NyeTARs.A019 | 0.447 | 1.277 | 0.350 |
| contig039640-TiITAR.A003  | contig022368-TiITARs.A047 | 0.414 | 1.182 | 0.350 |
| contig084868-BriTARs.A014 | contig086337-BriTARs.A019 | 0.292 | 0.834 | 0.350 |
| contig022341-TiITARs.A032 | contig022377-TiITARs.A050 | 0.142 | 0.407 | 0.350 |
| contig061433-BurTARs.A013 | contig059766-BurTARs.A029 | 0.349 | 0.997 | 0.350 |
| contig046007-NyeTARs.A017 | contig007512-TiITARs.A024 | 0.323 | 0.923 | 0.350 |
| contig084886-BriTARs.A017 | contig022337-TiITARs.A031 | 0.122 | 0.347 | 0.350 |
| contig046007-NyeTARs.A017 | contig046014-NyeTARs.A024 | 0.106 | 0.303 | 0.350 |
| contig022390-TiITARs.A055 | contig056134-TiITARs.A058 | 0.255 | 0.727 | 0.350 |
| contig022356-TiITARs.A040 | contig022368-TiITARs.A046 | 0.127 | 0.362 | 0.350 |
| contig022343-TiITARs.A033 | contig003909-ZebTAR.A003  | 0.383 | 1.091 | 0.351 |
| contig023443-TiITAR.A005  | contig030464-ZebTARs.A025 | 0.379 | 1.080 | 0.351 |
| contig062039-NyeTARs.A022 | contig053145-ZebTARs.A028 | 0.278 | 0.792 | 0.351 |
| contig020038-BurTAR.A002  | contig022390-TiITARs.A056 | 0.338 | 0.962 | 0.351 |
| contig007518-TiITARs.A019 | contig003909-ZebTAR.A003  | 0.393 | 1.121 | 0.351 |
| contig045302-BurTAR.A001  | contig053139-ZebTARs.A023 | 0.411 | 1.170 | 0.351 |
| contig032272-NyeTAR.A004  | contig022343-TiITARs.A033 | 0.383 | 1.090 | 0.351 |
| contig057145-BurTARs.A018 | contig054630-BurTARs.A023 | 0.377 | 1.073 | 0.351 |
| contig059673-BurTARs.A016 | contig039639-TiITAR.A001  | 0.458 | 1.305 | 0.351 |
| contig057145-BurTARs.A018 | contig061417-ZebTARs.A020 | 0.101 | 0.289 | 0.351 |
| contig039640-TiITAR.A003  | contig066285-ZebTARs.A016 | 0.429 | 1.222 | 0.351 |
| contig086344-BriTARs.A020 | contig066330-ZebTARs.A027 | 0.284 | 0.809 | 0.351 |
| contig022324-TiITARs.A027 | contig030464-ZebTARs.A025 | 0.160 | 0.456 | 0.351 |
| contig039640-TiITAR.A003  | contig022357-TiITARs.A041 | 0.419 | 1.192 | 0.351 |
| contig020038-BurTAR.A002  | contig060707-BurTARs.A015 | 0.345 | 0.981 | 0.351 |
| contig045302-BurTAR.A001  | contig022354-TiITARs.A037 | 0.394 | 1.121 | 0.352 |
| contig060105-NyeTARs.A018 | contig040586-ZebTAR.A002  | 0.409 | 1.164 | 0.352 |
| contig061433-BurTARs.A013 | contig039640-TiITAR.A003  | 0.436 | 1.239 | 0.352 |
| contig022341-TiITARs.A032 | contig066056-ZebTARs.A017 | 0.315 | 0.895 | 0.352 |
| contig060292-NyeTARs.A027 | contig040586-ZebTAR.A002  | 0.456 | 1.295 | 0.352 |
| contig057145-BurTARs.A018 | contig049534-BurTARs.A025 | 0.145 | 0.413 | 0.352 |
| contig022354-TiITARs.A037 | contig059768-ZebTARs.A022 | 0.335 | 0.950 | 0.352 |
| contig057305-BurTARs.A031 | contig040586-ZebTAR.A002  | 0.456 | 1.295 | 0.352 |
| contig086351-BriTARs.A021 | contig040586-ZebTAR.A002  | 0.444 | 1.261 | 0.352 |
| contig039640-TiITAR.A002  | contig022375-TiITARs.A048 | 0.390 | 1.108 | 0.352 |
| contig086337-BriTARs.A019 | contig039642-TiITAR.A004  | 0.400 | 1.137 | 0.352 |
| contig020038-BurTAR.A002  | contig022354-TiITARs.A038 | 0.379 | 1.076 | 0.352 |
| contig061977-BurTARs.A012 | contig066056-ZebTARs.A017 | 0.295 | 0.838 | 0.352 |
| contig057148-BurTARs.A028 | contig032272-NyeTAR.A004  | 0.378 | 1.074 | 0.352 |
| contig086337-BriTARs.A019 | contig041024-BurTARs.A026 | 0.318 | 0.902 | 0.352 |
| contig059766-BurTARs.A029 | contig062039-NyeTARs.A022 | 0.281 | 0.797 | 0.352 |
| contig039640-TiITAR.A003  | contig022349-TiITARs.A035 | 0.426 | 1.208 | 0.352 |

|                           |                           |       |       |       |
|---------------------------|---------------------------|-------|-------|-------|
| contig046010-NyeTARs.A019 | contig003909-ZebTAR.A003  | 0.389 | 1.104 | 0.352 |
| contig007512-TiITARs.A024 | contig022378-TiITARs.A051 | 0.297 | 0.842 | 0.352 |
| contig057148-BurTARs.A028 | contig022349-TiITARs.A035 | 0.141 | 0.401 | 0.352 |
| contig046014-NyeTARs.A024 | contig022324-TiITARs.A027 | 0.144 | 0.409 | 0.352 |
| contig086344-BriTARs.A020 | contig040586-ZebTAR.A001  | 0.435 | 1.234 | 0.353 |
| contig084886-BriTARs.A017 | contig045302-BurTAR.A001  | 0.444 | 1.260 | 0.353 |
| contig084887-BriTARs.A018 | contig039642-TiITAR.A004  | 0.432 | 1.224 | 0.353 |
| contig022324-TiITARs.A027 | contig053145-ZebTARs.A028 | 0.341 | 0.966 | 0.353 |
| contig086337-BriTARs.A019 | contig035377-NyeTARs.A023 | 0.287 | 0.815 | 0.353 |
| contig039640-TiITAR.A003  | contig030471-ZebTARs.A024 | 0.440 | 1.247 | 0.353 |
| contig039642-TiITAR.A004  | contig022363-TiITARs.A044 | 0.404 | 1.145 | 0.353 |
| contig056200-NyeTARs.A029 | contig066056-ZebTARs.A017 | 0.315 | 0.893 | 0.353 |
| contig007512-TiITARs.A024 | contig062676-ZebTARs.A019 | 0.298 | 0.844 | 0.353 |
| contig022382-TiITARs.A053 | contig040586-ZebTAR.A002  | 0.410 | 1.161 | 0.353 |
| contig039640-TiITAR.A002  | contig066285-ZebTARs.A016 | 0.425 | 1.203 | 0.353 |
| contig054630-BurTARs.A023 | contig046011-NyeTARs.A016 | 0.409 | 1.159 | 0.353 |
| contig035377-NyeTARs.A023 | contig007512-TiITARs.A024 | 0.298 | 0.843 | 0.353 |
| contig084868-BriTARs.A014 | contig056134-TiITARs.A058 | 0.302 | 0.854 | 0.353 |
| contig022356-TiITARs.A040 | contig022363-TiITARs.A043 | 0.144 | 0.406 | 0.353 |
| contig039640-TiITAR.A002  | contig030445-ZebTARs.A026 | 0.363 | 1.029 | 0.353 |
| contig057148-BurTARs.A028 | contig007512-TiITARs.A024 | 0.330 | 0.935 | 0.353 |
| contig022368-TiITARs.A047 | contig053145-ZebTARs.A028 | 0.319 | 0.902 | 0.353 |
| contig056020-BurTARs.A021 | contig022354-TiITARs.A037 | 0.157 | 0.443 | 0.353 |
| contig084887-BriTARs.A018 | contig030471-ZebTARs.A024 | 0.065 | 0.183 | 0.353 |
| contig039642-TiITAR.A004  | contig022375-TiITARs.A048 | 0.397 | 1.124 | 0.354 |
| contig035376-NyeTARs.A014 | contig039640-TiITAR.A002  | 0.377 | 1.067 | 0.354 |
| contig060707-BurTARs.A015 | contig022341-TiITARs.A032 | 0.327 | 0.926 | 0.354 |
| contig062039-NyeTARs.A022 | contig022383-TiITARs.A054 | 0.223 | 0.631 | 0.354 |
| contig055697-BurTARs.A022 | contig041024-BurTARs.A026 | 0.315 | 0.890 | 0.354 |
| contig022341-TiITARs.A032 | contig066285-ZebTARs.A016 | 0.165 | 0.467 | 0.354 |
| contig057145-BurTARs.A018 | contig066285-ZebTARs.A016 | 0.149 | 0.421 | 0.354 |
| contig039642-TiITAR.A004  | contig022368-TiITARs.A046 | 0.417 | 1.179 | 0.354 |
| contig022378-TiITARs.A051 | contig053145-ZebTARs.A028 | 0.282 | 0.796 | 0.354 |
| contig025313-BriTAR.A002  | contig007518-TiITARs.A019 | 0.385 | 1.088 | 0.354 |
| contig054630-BurTARs.A023 | contig022356-TiITARs.A040 | 0.368 | 1.039 | 0.354 |
| contig059766-BurTARs.A029 | contig066691-ZebTARs.A015 | 0.336 | 0.948 | 0.354 |
| contig061091-BurTARs.A014 | contig022353-TiITARs.A036 | 0.042 | 0.119 | 0.354 |
| contig023443-TiITAR.A005  | contig022362-TiITARs.A042 | 0.371 | 1.047 | 0.354 |
| contig086337-BriTARs.A019 | contig020038-BurTAR.A002  | 0.357 | 1.008 | 0.354 |
| contig084868-BriTARs.A014 | contig059766-BurTARs.A029 | 0.289 | 0.816 | 0.354 |
| contig007512-TiITARs.A024 | contig022355-TiITARs.A039 | 0.312 | 0.881 | 0.354 |
| contig059766-BurTARs.A029 | contig022324-TiITARs.A027 | 0.343 | 0.968 | 0.354 |
| contig057145-BurTARs.A018 | contig022324-TiITARs.A027 | 0.167 | 0.471 | 0.354 |
| contig056200-NyeTARs.A029 | contig040586-ZebTAR.A001  | 0.409 | 1.154 | 0.354 |
| contig023443-TiITAR.A005  | contig022353-TiITARs.A036 | 0.406 | 1.145 | 0.354 |
| contig056200-NyeTARs.A029 | contig022345-TiITARs.A034 | 0.256 | 0.722 | 0.354 |
| contig046014-NyeTARs.A024 | contig030464-ZebTARs.A025 | 0.135 | 0.382 | 0.354 |
| contig046013-NyeTARs.A021 | contig039640-TiITAR.A003  | 0.426 | 1.201 | 0.354 |
| contig041024-BurTARs.A026 | contig040586-ZebTAR.A001  | 0.425 | 1.200 | 0.355 |
| contig022345-TiITARs.A034 | contig059768-ZebTARs.A022 | 0.343 | 0.967 | 0.355 |
| contig084886-BriTARs.A017 | contig046014-NyeTARs.A024 | 0.132 | 0.371 | 0.355 |
| contig066691-ZebTARs.A015 | contig053145-ZebTARs.A028 | 0.339 | 0.955 | 0.355 |
| contig020038-BurTAR.A002  | contig022343-TiITARs.A033 | 0.382 | 1.078 | 0.355 |

|                           |                           |       |       |       |
|---------------------------|---------------------------|-------|-------|-------|
| contig022334-TiITARs.A030 | contig062676-ZebTARs.A019 | 0.220 | 0.621 | 0.355 |
| contig022345-TiITARs.A034 | contig022354-TiITARs.A038 | 0.124 | 0.350 | 0.355 |
| contig025313-BriTAR.A002  | contig022363-TiITARs.A044 | 0.376 | 1.059 | 0.355 |
| contig084876-BriTARs.A015 | contig039640-TiITAR.A002  | 0.398 | 1.123 | 0.355 |
| contig022355-TiITARs.A039 | contig059768-ZebTARs.A022 | 0.352 | 0.992 | 0.355 |
| contig039642-TiITAR.A004  | contig022320-TiITARs.A059 | 0.417 | 1.175 | 0.355 |
| contig057148-BurTARs.A028 | contig022345-TiITARs.A034 | 0.135 | 0.380 | 0.355 |
| contig059768-ZebTARs.A022 | contig030471-ZebTARs.A024 | 0.384 | 1.083 | 0.355 |
| contig059766-BurTARs.A029 | contig022368-TiITARs.A047 | 0.321 | 0.904 | 0.355 |
| contig022343-TiITARs.A033 | contig030464-ZebTARs.A025 | 0.128 | 0.360 | 0.355 |
| contig086344-BriTARs.A020 | contig032272-NyeTAR.A004  | 0.352 | 0.990 | 0.355 |
| contig039640-TiITAR.A002  | contig022379-TiITARs.A052 | 0.407 | 1.147 | 0.355 |
| contig022343-TiITARs.A033 | contig040586-ZebTAR.A002  | 0.426 | 1.200 | 0.355 |
| contig056020-BurTARs.A021 | contig039640-TiITAR.A002  | 0.430 | 1.211 | 0.355 |
| contig040586-ZebTAR.A001  | contig053139-ZebTARs.A023 | 0.411 | 1.155 | 0.355 |
| contig060105-NyeTARs.A018 | contig003909-ZebTAR.A003  | 0.342 | 0.963 | 0.355 |
| contig049534-BurTARs.A025 | contig039640-TiITAR.A002  | 0.427 | 1.201 | 0.356 |
| contig086344-BriTARs.A020 | contig038663-NyeTAR.A005  | 0.438 | 1.231 | 0.356 |
| contig039640-TiITAR.A002  | contig030440-ZebTARs.A029 | 0.375 | 1.055 | 0.356 |
| contig039639-TiITAR.A001  | contig066691-ZebTARs.A015 | 0.435 | 1.222 | 0.356 |
| contig060707-BurTARs.A015 | contig022378-TiITARs.A051 | 0.315 | 0.886 | 0.356 |
| contig022341-TiITARs.A032 | contig022356-TiITARs.A040 | 0.117 | 0.330 | 0.356 |
| contig032272-NyeTAR.A004  | contig060105-NyeTARs.A018 | 0.344 | 0.967 | 0.356 |
| contig022324-TiITARs.A027 | contig022341-TiITARs.A032 | 0.167 | 0.471 | 0.356 |
| contig041024-BurTARs.A026 | contig022365-TiITARs.A045 | 0.117 | 0.330 | 0.356 |
| contig039640-TiITAR.A003  | contig022375-TiITARs.A048 | 0.387 | 1.089 | 0.356 |
| contig046010-NyeTARs.A019 | contig022345-TiITARs.A034 | 0.131 | 0.369 | 0.356 |
| contig057145-BurTARs.A018 | contig059768-ZebTARs.A022 | 0.370 | 1.040 | 0.356 |
| contig055697-BurTARs.A022 | contig046007-NyeTARs.A017 | 0.313 | 0.879 | 0.356 |
| contig045302-BurTAR.A001  | contig056134-TiITARs.A058 | 0.393 | 1.103 | 0.356 |
| contig065494-BurTARs.A030 | contig022383-TiITARs.A054 | 0.283 | 0.794 | 0.356 |
| contig020038-BurTAR.A002  | contig055697-BurTARs.A022 | 0.361 | 1.013 | 0.356 |
| contig086344-BriTARs.A020 | contig003909-ZebTAR.A003  | 0.350 | 0.984 | 0.356 |
| contig007524-TiITARs.A026 | contig066056-ZebTARs.A017 | 0.285 | 0.800 | 0.356 |
| contig007520-TiITARs.A025 | contig053145-ZebTARs.A028 | 0.236 | 0.662 | 0.356 |
| contig022368-TiITARs.A046 | contig053145-ZebTARs.A028 | 0.313 | 0.877 | 0.356 |
| contig055697-BurTARs.A022 | contig038663-NyeTAR.A005  | 0.415 | 1.164 | 0.357 |
| contig022354-TiITARs.A037 | contig022356-TiITARs.A040 | 0.155 | 0.433 | 0.357 |
| contig032272-NyeTAR.A004  | contig007518-TiITARs.A019 | 0.388 | 1.087 | 0.357 |
| contig065494-BurTARs.A030 | contig022355-TiITARs.A039 | 0.325 | 0.912 | 0.357 |
| contig025313-BriTAR.A002  | contig022355-TiITARs.A039 | 0.380 | 1.064 | 0.357 |
| contig039640-TiITAR.A003  | contig007520-TiITARs.A025 | 0.421 | 1.180 | 0.357 |
| contig039642-TiITAR.A004  | contig022355-TiITARs.A039 | 0.434 | 1.217 | 0.357 |
| contig022355-TiITARs.A039 | contig040586-ZebTAR.A002  | 0.446 | 1.250 | 0.357 |
| contig039642-TiITAR.A004  | contig056134-TiITARs.A058 | 0.372 | 1.044 | 0.357 |
| contig061091-BurTARs.A014 | contig022390-TiITARs.A055 | 0.197 | 0.551 | 0.357 |
| contig060105-NyeTARs.A018 | contig039640-TiITAR.A003  | 0.408 | 1.144 | 0.357 |
| contig029633-BriTAR.A003  | contig030464-ZebTARs.A025 | 0.467 | 1.309 | 0.357 |
| contig066056-ZebTARs.A017 | contig061410-ZebTARs.A021 | 0.299 | 0.838 | 0.357 |
| contig084868-BriTARs.A014 | contig053145-ZebTARs.A028 | 0.287 | 0.804 | 0.357 |
| contig022354-TiITARs.A038 | contig022320-TiITARs.A059 | 0.118 | 0.332 | 0.357 |
| contig059766-BurTARs.A029 | contig022378-TiITARs.A051 | 0.285 | 0.799 | 0.357 |
| contig029633-BriTAR.A003  | contig022363-TiITARs.A043 | 0.458 | 1.282 | 0.357 |

|                           |                           |       |       |       |
|---------------------------|---------------------------|-------|-------|-------|
| contig041024-BurTARs.A026 | contig022354-TiITARs.A038 | 0.121 | 0.338 | 0.357 |
| contig041024-BurTARs.A026 | contig046007-NyeTARs.A017 | 0.109 | 0.304 | 0.357 |
| contig086344-BriTARs.A020 | contig045302-BurTAR.A001  | 0.433 | 1.211 | 0.357 |
| contig035377-NyeTARs.A023 | contig056134-TiITARs.A058 | 0.307 | 0.860 | 0.357 |
| contig022353-TiITARs.A036 | contig066691-ZebTARs.A015 | 0.033 | 0.093 | 0.357 |
| contig039642-TiITAR.A004  | contig022362-TiITARs.A042 | 0.420 | 1.175 | 0.357 |
| contig022341-TiITARs.A032 | contig022368-TiITARs.A046 | 0.132 | 0.369 | 0.357 |
| contig065494-BurTARs.A030 | contig046014-NyeTARs.A024 | 0.318 | 0.890 | 0.358 |
| contig084887-BriTARs.A018 | contig066285-ZebTARs.A016 | 0.144 | 0.402 | 0.358 |
| contig045302-BurTAR.A001  | contig022356-TiITARs.A040 | 0.427 | 1.195 | 0.358 |
| contig039639-TiITAR.A001  | contig022379-TiITARs.A052 | 0.403 | 1.127 | 0.358 |
| contig082565-BriTARs.A022 | contig053139-ZebTARs.A023 | 0.269 | 0.753 | 0.358 |
| contig059766-BurTARs.A029 | contig007520-TiITARs.A025 | 0.234 | 0.654 | 0.358 |
| contig057145-BurTARs.A018 | contig066056-ZebTARs.A017 | 0.334 | 0.934 | 0.358 |
| contig084887-BriTARs.A018 | contig039640-TiITAR.A002  | 0.424 | 1.186 | 0.358 |
| contig039640-TiITAR.A002  | contig061410-ZebTARs.A021 | 0.388 | 1.086 | 0.358 |
| contig020038-BurTAR.A002  | contig007518-TiITARs.A019 | 0.392 | 1.095 | 0.358 |
| contig049540-BurTARs.A024 | contig066056-ZebTARs.A017 | 0.315 | 0.881 | 0.358 |
| contig061977-BurTARs.A012 | contig039639-TiITAR.A001  | 0.377 | 1.054 | 0.358 |
| contig055697-BurTARs.A022 | contig058002-NyeTARs.A025 | 0.233 | 0.652 | 0.358 |
| contig022377-TiITARs.A050 | contig040586-ZebTAR.A002  | 0.424 | 1.185 | 0.358 |
| contig049534-BurTARs.A025 | contig046007-NyeTARs.A017 | 0.154 | 0.431 | 0.358 |
| contig022356-TiITARs.A040 | contig022365-TiITARs.A045 | 0.126 | 0.353 | 0.358 |
| contig065494-BurTARs.A030 | contig066285-ZebTARs.A016 | 0.328 | 0.916 | 0.358 |
| contig039640-TiITAR.A003  | contig022345-TiITARs.A034 | 0.407 | 1.138 | 0.358 |
| contig046014-NyeTARs.A024 | contig053139-ZebTARs.A023 | 0.321 | 0.896 | 0.358 |
| contig020038-BurTAR.A002  | contig056020-BurTARs.A021 | 0.423 | 1.181 | 0.358 |
| contig056134-TiITARs.A058 | contig040586-ZebTAR.A001  | 0.390 | 1.089 | 0.358 |
| contig022383-TiITARs.A054 | contig056134-TiITARs.A058 | 0.295 | 0.823 | 0.358 |
| contig046007-NyeTARs.A017 | contig039640-TiITAR.A002  | 0.425 | 1.185 | 0.358 |
| contig056021-BurTARs.A020 | contig022330-TiITARs.A028 | 0.033 | 0.091 | 0.358 |
| contig084876-BriTARs.A015 | contig022334-TiITARs.A030 | 0.220 | 0.613 | 0.358 |
| contig022345-TiITARs.A034 | contig053145-ZebTARs.A028 | 0.322 | 0.897 | 0.358 |
| contig057305-BurTARs.A031 | contig066056-ZebTARs.A017 | 0.275 | 0.767 | 0.359 |
| contig040586-ZebTAR.A001  | contig030464-ZebTARs.A025 | 0.454 | 1.266 | 0.359 |
| contig035381-NyeTARs.A015 | contig053139-ZebTARs.A023 | 0.264 | 0.737 | 0.359 |
| contig003909-ZebTAR.A003  | contig030464-ZebTARs.A025 | 0.397 | 1.106 | 0.359 |
| contig045302-BurTAR.A001  | contig061433-BurTARs.A013 | 0.443 | 1.234 | 0.359 |
| contig022320-TiITARs.A059 | contig040586-ZebTAR.A002  | 0.424 | 1.183 | 0.359 |
| contig046014-NyeTARs.A024 | contig022345-TiITARs.A034 | 0.116 | 0.322 | 0.359 |
| contig086344-BriTARs.A020 | contig062677-ZebTARs.A018 | 0.323 | 0.901 | 0.359 |
| contig054630-BurTARs.A023 | contig022375-TiITARs.A048 | 0.352 | 0.980 | 0.359 |
| contig022356-TiITARs.A040 | contig059768-ZebTARs.A022 | 0.361 | 1.007 | 0.359 |
| contig038663-NyeTAR.A005  | contig056134-TiITARs.A058 | 0.399 | 1.112 | 0.359 |
| contig065494-BurTARs.A030 | contig056134-TiITARs.A058 | 0.063 | 0.174 | 0.359 |
| contig022337-TiITARs.A031 | contig040586-ZebTAR.A002  | 0.447 | 1.247 | 0.359 |
| contig039642-TiITAR.A004  | contig022330-TiITARs.A028 | 0.413 | 1.151 | 0.359 |
| contig055697-BurTARs.A022 | contig022390-TiITARs.A055 | 0.305 | 0.849 | 0.359 |
| contig084868-BriTARs.A014 | contig065494-BurTARs.A030 | 0.292 | 0.813 | 0.359 |
| contig046011-NyeTARs.A016 | contig059768-ZebTARs.A022 | 0.402 | 1.119 | 0.359 |
| contig057145-BurTARs.A018 | contig022377-TiITARs.A050 | 0.141 | 0.393 | 0.359 |
| contig049540-BurTARs.A024 | contig040586-ZebTAR.A001  | 0.405 | 1.128 | 0.359 |
| contig054630-BurTARs.A023 | contig022363-TiITARs.A044 | 0.354 | 0.985 | 0.359 |



|                           |                           |       |       |       |
|---------------------------|---------------------------|-------|-------|-------|
| contig046014-NyeTARs.A024 | contig022356-TiITARs.A040 | 0.104 | 0.290 | 0.359 |
| contig046014-NyeTARs.A024 | contig039642-TiITAR.A004  | 0.413 | 1.149 | 0.359 |
| contig032272-NyeTAR.A004  | contig046010-NyeTARs.A019 | 0.393 | 1.095 | 0.359 |
| contig025313-BriTAR.A002  | contig022354-TiITARs.A037 | 0.357 | 0.993 | 0.359 |
| contig046014-NyeTARs.A024 | contig066330-ZebTARs.A027 | 0.318 | 0.885 | 0.359 |
| contig038663-NyeTAR.A005  | contig022368-TiITARs.A046 | 0.437 | 1.215 | 0.359 |
| contig039640-TiITAR.A003  | contig066691-ZebTARs.A015 | 0.430 | 1.195 | 0.359 |
| contig084887-BriTARs.A018 | contig038663-NyeTAR.A005  | 0.442 | 1.230 | 0.359 |
| contig084887-BriTARs.A018 | contig045302-BurTAR.A001  | 0.431 | 1.198 | 0.359 |
| contig035375-NyeTARs.A013 | contig039640-TiITAR.A002  | 0.374 | 1.038 | 0.360 |
| contig066285-ZebTARs.A016 | contig066330-ZebTARs.A027 | 0.328 | 0.911 | 0.360 |
| contig022355-TiITARs.A039 | contig022320-TiITARs.A059 | 0.102 | 0.284 | 0.360 |
| contig061091-BurTARs.A014 | contig059766-BurTARs.A029 | 0.336 | 0.933 | 0.360 |
| contig040586-ZebTAR.A001  | contig053145-ZebTARs.A028 | 0.390 | 1.083 | 0.360 |
| contig039639-TiITAR.A001  | contig022357-TiITARs.A041 | 0.434 | 1.205 | 0.360 |
| contig055697-BurTARs.A022 | contig022365-TiITARs.A045 | 0.315 | 0.876 | 0.360 |
| contig022345-TiITARs.A034 | contig062677-ZebTARs.A018 | 0.255 | 0.708 | 0.360 |
| contig029633-BriTAR.A003  | contig007512-TiITARs.A024 | 0.410 | 1.139 | 0.360 |
| contig045302-BurTAR.A001  | contig053145-ZebTARs.A028 | 0.395 | 1.096 | 0.360 |
| contig054630-BurTARs.A023 | contig022345-TiITARs.A034 | 0.349 | 0.970 | 0.360 |
| contig038663-NyeTAR.A005  | contig022354-TiITARs.A037 | 0.406 | 1.126 | 0.360 |
| contig022355-TiITARs.A039 | contig003909-ZebTAR.A003  | 0.389 | 1.081 | 0.360 |
| contig084887-BriTARs.A018 | contig054630-BurTARs.A023 | 0.391 | 1.085 | 0.360 |
| contig020038-BurTAR.A002  | contig057148-BurTARs.A028 | 0.388 | 1.078 | 0.360 |
| contig029633-BriTAR.A003  | contig046010-NyeTARs.A019 | 0.464 | 1.289 | 0.360 |
| contig049540-BurTARs.A024 | contig022345-TiITARs.A034 | 0.255 | 0.707 | 0.360 |
| contig084868-BriTARs.A014 | contig007512-TiITARs.A024 | 0.311 | 0.863 | 0.360 |
| contig084887-BriTARs.A018 | contig055697-BurTARs.A022 | 0.318 | 0.882 | 0.360 |
| contig086344-BriTARs.A020 | contig007520-TiITARs.A025 | 0.287 | 0.795 | 0.360 |
| contig060707-BurTARs.A015 | contig057305-BurTARs.A031 | 0.281 | 0.781 | 0.360 |
| contig022383-TiITARs.A054 | contig066330-ZebTARs.A027 | 0.285 | 0.789 | 0.361 |
| contig007520-TiITARs.A025 | contig022383-TiITARs.A054 | 0.303 | 0.840 | 0.361 |
| contig061091-BurTARs.A014 | contig053145-ZebTARs.A028 | 0.339 | 0.940 | 0.361 |
| contig059766-BurTARs.A029 | contig022368-TiITARs.A046 | 0.317 | 0.878 | 0.361 |
| contig055697-BurTARs.A022 | contig049534-BurTARs.A025 | 0.329 | 0.913 | 0.361 |
| contig038663-NyeTAR.A005  | contig053145-ZebTARs.A028 | 0.398 | 1.105 | 0.361 |
| contig022390-TiITARs.A055 | contig030464-ZebTARs.A025 | 0.211 | 0.586 | 0.361 |
| contig061433-BurTARs.A013 | contig022377-TiITARs.A050 | 0.146 | 0.404 | 0.361 |
| contig086337-BriTARs.A019 | contig058002-NyeTARs.A025 | 0.231 | 0.640 | 0.361 |
| contig032272-NyeTAR.A004  | contig022355-TiITARs.A039 | 0.389 | 1.079 | 0.361 |
| contig046014-NyeTARs.A024 | contig007512-TiITARs.A024 | 0.323 | 0.895 | 0.361 |
| contig023443-TiITAR.A005  | contig022363-TiITARs.A044 | 0.363 | 1.007 | 0.361 |
| contig065494-BurTARs.A030 | contig062039-NyeTARs.A022 | 0.282 | 0.781 | 0.361 |
| contig035381-NyeTARs.A015 | contig007512-TiITARs.A024 | 0.274 | 0.759 | 0.361 |
| contig040586-ZebTAR.A001  | contig062677-ZebTARs.A018 | 0.408 | 1.129 | 0.361 |
| contig022355-TiITARs.A039 | contig022356-TiITARs.A040 | 0.103 | 0.284 | 0.361 |
| contig060105-NyeTARs.A018 | contig040586-ZebTAR.A001  | 0.429 | 1.187 | 0.361 |
| contig022356-TiITARs.A040 | contig022368-TiITARs.A047 | 0.133 | 0.368 | 0.361 |
| contig065494-BurTARs.A030 | contig022368-TiITARs.A046 | 0.326 | 0.902 | 0.361 |
| contig022324-TiITARs.A027 | contig022356-TiITARs.A040 | 0.160 | 0.443 | 0.361 |
| contig039640-TiITAR.A002  | contig061417-ZebTARs.A020 | 0.402 | 1.112 | 0.361 |
| contig060292-NyeTARs.A027 | contig066056-ZebTARs.A017 | 0.277 | 0.767 | 0.361 |
| contig022363-TiITARs.A044 | contig059768-ZebTARs.A022 | 0.354 | 0.980 | 0.361 |

|                           |                           |       |       |       |
|---------------------------|---------------------------|-------|-------|-------|
| contig062039-NyeTARs.A022 | contig056134-TiITARs.A058 | 0.290 | 0.804 | 0.361 |
| contig022353-TiITARs.A036 | contig030471-ZebTARs.A024 | 0.068 | 0.189 | 0.361 |
| contig034854-BurTARs.A027 | contig022390-TiITARs.A055 | 0.069 | 0.190 | 0.361 |
| contig086337-BriTARs.A019 | contig022375-TiITARs.A048 | 0.299 | 0.827 | 0.361 |
| contig058002-NyeTARs.A025 | contig053145-ZebTARs.A028 | 0.243 | 0.672 | 0.361 |
| contig039640-TiITAR.A003  | contig007524-TiITARs.A026 | 0.428 | 1.183 | 0.361 |
| contig061977-BurTARs.A012 | contig057148-BurTARs.A028 | 0.240 | 0.665 | 0.362 |
| contig045302-BurTAR.A001  | contig056200-NyeTARs.A029 | 0.406 | 1.122 | 0.362 |
| contig046011-NyeTARs.A016 | contig039640-TiITAR.A002  | 0.489 | 1.354 | 0.362 |
| contig022324-TiITARs.A027 | contig022355-TiITARs.A039 | 0.149 | 0.412 | 0.362 |
| contig022383-TiITARs.A054 | contig066056-ZebTARs.A017 | 0.293 | 0.810 | 0.362 |
| contig084868-BriTARs.A014 | contig066056-ZebTARs.A017 | 0.301 | 0.833 | 0.362 |
| contig022324-TiITARs.A027 | contig022349-TiITARs.A035 | 0.167 | 0.463 | 0.362 |
| contig054630-BurTARs.A023 | contig022355-TiITARs.A039 | 0.359 | 0.992 | 0.362 |
| contig022375-TiITARs.A048 | contig059768-ZebTARs.A022 | 0.345 | 0.953 | 0.362 |
| contig032272-NyeTAR.A004  | contig030464-ZebTARs.A025 | 0.396 | 1.094 | 0.362 |
| contig056020-BurTARs.A021 | contig022377-TiITARs.A050 | 0.139 | 0.383 | 0.362 |
| contig039642-TiITAR.A004  | contig022349-TiITARs.A035 | 0.438 | 1.211 | 0.362 |
| contig022355-TiITARs.A039 | contig061417-ZebTARs.A020 | 0.109 | 0.301 | 0.362 |
| contig046010-NyeTARs.A019 | contig007512-TiITARs.A024 | 0.333 | 0.920 | 0.362 |
| contig060707-BurTARs.A015 | contig007520-TiITARs.A025 | 0.283 | 0.782 | 0.362 |
| contig086344-BriTARs.A020 | contig022379-TiITARs.A052 | 0.307 | 0.848 | 0.362 |
| contig025313-BriTAR.A002  | contig084886-BriTARs.A017 | 0.381 | 1.054 | 0.362 |
| contig022345-TiITARs.A034 | contig022320-TiITARs.A059 | 0.112 | 0.308 | 0.362 |
| contig022354-TiITARs.A037 | contig056134-TiITARs.A058 | 0.315 | 0.868 | 0.362 |
| contig055697-BurTARs.A022 | contig066890-ZebTARs.A014 | 0.273 | 0.753 | 0.362 |
| contig029633-BriTAR.A003  | contig053145-ZebTARs.A028 | 0.402 | 1.111 | 0.362 |
| contig039640-TiITAR.A003  | contig061417-ZebTARs.A020 | 0.408 | 1.127 | 0.362 |
| contig086344-BriTARs.A020 | contig022378-TiITARs.A051 | 0.324 | 0.895 | 0.362 |
| contig022377-TiITARs.A050 | contig030471-ZebTARs.A024 | 0.127 | 0.351 | 0.362 |
| contig025313-BriTAR.A002  | contig046011-NyeTARs.A016 | 0.434 | 1.197 | 0.362 |
| contig084886-BriTARs.A017 | contig023443-TiITAR.A005  | 0.368 | 1.015 | 0.362 |
| contig086337-BriTARs.A019 | contig022365-TiITARs.A045 | 0.312 | 0.861 | 0.362 |
| contig082565-BriTARs.A022 | contig066056-ZebTARs.A017 | 0.303 | 0.835 | 0.362 |
| contig056134-TiITARs.A058 | contig030471-ZebTARs.A024 | 0.357 | 0.984 | 0.363 |
| contig041024-BurTARs.A026 | contig053139-ZebTARs.A023 | 0.320 | 0.883 | 0.363 |
| contig059766-BurTARs.A029 | contig022345-TiITARs.A034 | 0.321 | 0.886 | 0.363 |
| contig059766-BurTARs.A029 | contig058002-NyeTARs.A025 | 0.241 | 0.664 | 0.363 |
| contig057148-BurTARs.A028 | contig061410-ZebTARs.A021 | 0.240 | 0.663 | 0.363 |
| contig022353-TiITARs.A036 | contig040586-ZebTAR.A001  | 0.424 | 1.170 | 0.363 |
| contig022368-TiITARs.A046 | contig066330-ZebTARs.A027 | 0.325 | 0.897 | 0.363 |
| contig046014-NyeTARs.A024 | contig040586-ZebTAR.A002  | 0.420 | 1.157 | 0.363 |
| contig057145-BurTARs.A018 | contig022330-TiITARs.A028 | 0.110 | 0.303 | 0.363 |
| contig061977-BurTARs.A012 | contig022345-TiITARs.A034 | 0.227 | 0.625 | 0.363 |
| contig029633-BriTAR.A003  | contig065494-BurTARs.A030 | 0.396 | 1.091 | 0.363 |
| contig029633-BriTAR.A003  | contig059766-BurTARs.A029 | 0.398 | 1.096 | 0.363 |
| contig065494-BurTARs.A030 | contig022368-TiITARs.A047 | 0.331 | 0.911 | 0.363 |
| contig057145-BurTARs.A018 | contig041024-BurTARs.A026 | 0.113 | 0.312 | 0.363 |
| contig057148-BurTARs.A028 | contig022330-TiITARs.A028 | 0.131 | 0.359 | 0.363 |
| contig086337-BriTARs.A019 | contig022355-TiITARs.A039 | 0.303 | 0.833 | 0.363 |
| contig056020-BurTARs.A021 | contig030471-ZebTARs.A024 | 0.103 | 0.285 | 0.363 |
| contig039639-TiITAR.A001  | contig030445-ZebTARs.A026 | 0.365 | 1.005 | 0.363 |
| contig055697-BurTARs.A022 | contig022355-TiITARs.A039 | 0.303 | 0.833 | 0.363 |

|                           |                           |       |       |       |
|---------------------------|---------------------------|-------|-------|-------|
| contig020038-BurTAR.A002  | contig046010-NyeTARs.A019 | 0.398 | 1.096 | 0.363 |
| contig065494-BurTARs.A030 | contig066691-ZebTARs.A015 | 0.340 | 0.936 | 0.364 |
| contig022349-TiITARs.A035 | contig040586-ZebTAR.A002  | 0.447 | 1.230 | 0.364 |
| contig035376-NyeTARs.A014 | contig053139-ZebTARs.A023 | 0.267 | 0.735 | 0.364 |
| contig060105-NyeTARs.A018 | contig022341-TiITARs.A032 | 0.333 | 0.916 | 0.364 |
| contig060707-BurTARs.A015 | contig022379-TiITARs.A052 | 0.302 | 0.831 | 0.364 |
| contig082565-BriTARs.A022 | contig039640-TiITAR.A002  | 0.367 | 1.008 | 0.364 |
| contig022363-TiITARs.A044 | contig040586-ZebTAR.A002  | 0.407 | 1.118 | 0.364 |
| contig061091-BurTARs.A014 | contig039640-TiITAR.A002  | 0.424 | 1.166 | 0.364 |
| contig065494-BurTARs.A030 | contig007520-TiITARs.A025 | 0.240 | 0.661 | 0.364 |
| contig061433-BurTARs.A013 | contig022368-TiITARs.A047 | 0.164 | 0.452 | 0.364 |
| contig038663-NyeTAR.A005  | contig060105-NyeTARs.A018 | 0.431 | 1.185 | 0.364 |
| contig056021-BurTARs.A020 | contig022355-TiITARs.A039 | 0.112 | 0.308 | 0.364 |
| contig056021-BurTARs.A020 | contig039640-TiITAR.A003  | 0.409 | 1.125 | 0.364 |
| contig022382-TiITARs.A053 | contig066056-ZebTARs.A017 | 0.315 | 0.866 | 0.364 |
| contig057148-BurTARs.A028 | contig022334-TiITARs.A029 | 0.133 | 0.364 | 0.364 |
| contig086337-BriTARs.A019 | contig082565-BriTARs.A022 | 0.273 | 0.749 | 0.364 |
| contig022383-TiITARs.A054 | contig062676-ZebTARs.A019 | 0.026 | 0.071 | 0.364 |
| contig056021-BurTARs.A020 | contig022334-TiITARs.A030 | 0.149 | 0.410 | 0.364 |
| contig039640-TiITAR.A003  | contig056134-TiITARs.A058 | 0.370 | 1.015 | 0.364 |
| contig061433-BurTARs.A013 | contig041024-BurTARs.A026 | 0.144 | 0.395 | 0.364 |
| contig046010-NyeTARs.A019 | contig022330-TiITARs.A028 | 0.127 | 0.349 | 0.364 |
| contig054630-BurTARs.A023 | contig066890-ZebTARs.A014 | 0.343 | 0.941 | 0.364 |
| contig022355-TiITARs.A039 | contig066330-ZebTARs.A027 | 0.332 | 0.909 | 0.365 |
| contig055697-BurTARs.A022 | contig066285-ZebTARs.A016 | 0.332 | 0.912 | 0.365 |
| contig007512-TiITARs.A024 | contig022365-TiITARs.A045 | 0.317 | 0.870 | 0.365 |
| contig082565-BriTARs.A022 | contig007512-TiITARs.A024 | 0.279 | 0.765 | 0.365 |
| contig084887-BriTARs.A018 | contig049534-BurTARs.A025 | 0.139 | 0.380 | 0.365 |
| contig049534-BurTARs.A025 | contig053139-ZebTARs.A023 | 0.326 | 0.894 | 0.365 |
| contig049534-BurTARs.A025 | contig065494-BurTARs.A030 | 0.331 | 0.907 | 0.365 |
| contig046007-NyeTARs.A017 | contig022324-TiITARs.A027 | 0.158 | 0.433 | 0.365 |
| contig056021-BurTARs.A020 | contig039640-TiITAR.A002  | 0.407 | 1.115 | 0.365 |
| contig059768-ZebTARs.A022 | contig030440-ZebTARs.A029 | 0.337 | 0.925 | 0.365 |
| contig022363-TiITARs.A043 | contig053145-ZebTARs.A028 | 0.345 | 0.945 | 0.365 |
| contig022363-TiITARs.A043 | contig066330-ZebTARs.A027 | 0.345 | 0.945 | 0.365 |
| contig061091-BurTARs.A014 | contig040586-ZebTAR.A002  | 0.438 | 1.200 | 0.365 |
| contig059673-BurTARs.A016 | contig053145-ZebTARs.A028 | 0.251 | 0.688 | 0.365 |
| contig022355-TiITARs.A039 | contig066285-ZebTARs.A016 | 0.151 | 0.412 | 0.365 |
| contig022365-TiITARs.A045 | contig022390-TiITARs.A055 | 0.211 | 0.577 | 0.365 |
| contig007512-TiITARs.A024 | contig022341-TiITARs.A032 | 0.327 | 0.897 | 0.365 |
| contig086337-BriTARs.A019 | contig035381-NyeTARs.A015 | 0.268 | 0.734 | 0.365 |
| contig041024-BurTARs.A026 | contig007512-TiITARs.A024 | 0.322 | 0.882 | 0.365 |
| contig082565-BriTARs.A022 | contig022334-TiITARs.A030 | 0.224 | 0.613 | 0.365 |
| contig034854-BurTARs.A027 | contig039640-TiITAR.A002  | 0.367 | 1.004 | 0.365 |
| contig007520-TiITARs.A025 | contig066330-ZebTARs.A027 | 0.244 | 0.667 | 0.365 |
| contig046010-NyeTARs.A019 | contig022334-TiITARs.A029 | 0.129 | 0.354 | 0.365 |
| contig045302-BurTAR.A001  | contig060105-NyeTARs.A018 | 0.426 | 1.167 | 0.365 |
| contig066056-ZebTARs.A017 | contig030445-ZebTARs.A026 | 0.305 | 0.834 | 0.365 |
| contig046007-NyeTARs.A017 | contig053139-ZebTARs.A023 | 0.317 | 0.867 | 0.365 |
| contig084887-BriTARs.A018 | contig059768-ZebTARs.A022 | 0.384 | 1.050 | 0.365 |
| contig007512-TiITARs.A024 | contig022354-TiITARs.A038 | 0.325 | 0.888 | 0.366 |
| contig029633-BriTAR.A003  | contig022334-TiITARs.A030 | 0.386 | 1.057 | 0.366 |
| contig061091-BurTARs.A014 | contig040586-ZebTAR.A001  | 0.436 | 1.193 | 0.366 |

|                           |                           |       |       |       |
|---------------------------|---------------------------|-------|-------|-------|
| contig061977-BurTARs.A012 | contig022383-TiITARs.A054 | 0.136 | 0.373 | 0.366 |
| contig086337-BriTARs.A019 | contig022363-TiITARs.A043 | 0.339 | 0.927 | 0.366 |
| contig086337-BriTARs.A019 | contig049534-BurTARs.A025 | 0.327 | 0.893 | 0.366 |
| contig055697-BurTARs.A022 | contig022375-TiITARs.A048 | 0.303 | 0.829 | 0.366 |
| contig035375-NyeTARs.A013 | contig059768-ZebTARs.A022 | 0.337 | 0.920 | 0.366 |
| contig038663-NyeTAR.A005  | contig056200-NyeTARs.A029 | 0.416 | 1.137 | 0.366 |
| contig084868-BriTARs.A014 | contig007520-TiITARs.A025 | 0.317 | 0.867 | 0.366 |
| contig038663-NyeTAR.A005  | contig007512-TiITARs.A024 | 0.421 | 1.150 | 0.366 |
| contig022363-TiITARs.A043 | contig056134-TiITARs.A058 | 0.386 | 1.055 | 0.366 |
| contig035376-NyeTARs.A014 | contig039639-TiITAR.A001  | 0.381 | 1.042 | 0.366 |
| contig086344-BriTARs.A020 | contig057145-BurTARs.A018 | 0.348 | 0.950 | 0.366 |
| contig030471-ZebTARs.A024 | contig053145-ZebTARs.A028 | 0.348 | 0.951 | 0.366 |
| contig055697-BurTARs.A022 | contig040586-ZebTAR.A002  | 0.400 | 1.094 | 0.366 |
| contig020038-BurTAR.A002  | contig030464-ZebTARs.A025 | 0.401 | 1.095 | 0.366 |
| contig022354-TiITARs.A037 | contig003909-ZebTAR.A003  | 0.365 | 0.998 | 0.366 |
| contig045302-BurTAR.A001  | contig049540-BurTARs.A024 | 0.402 | 1.098 | 0.366 |
| contig084868-BriTARs.A014 | contig022334-TiITARs.A030 | 0.247 | 0.674 | 0.366 |
| contig057148-BurTARs.A028 | contig056134-TiITARs.A058 | 0.338 | 0.922 | 0.366 |
| contig022363-TiITARs.A043 | contig022363-TiITARs.A044 | 0.064 | 0.174 | 0.366 |
| contig039642-TiITAR.A004  | contig022343-TiITARs.A033 | 0.420 | 1.148 | 0.366 |
| contig022334-TiITARs.A030 | contig061410-ZebTARs.A021 | 0.219 | 0.597 | 0.366 |
| contig041024-BurTARs.A026 | contig038663-NyeTAR.A005  | 0.431 | 1.177 | 0.366 |
| contig045302-BurTAR.A001  | contig022324-TiITARs.A027 | 0.442 | 1.207 | 0.366 |
| contig086344-BriTARs.A020 | contig020038-BurTAR.A002  | 0.355 | 0.969 | 0.366 |
| contig049534-BurTARs.A025 | contig022355-TiITARs.A039 | 0.146 | 0.397 | 0.367 |
| contig032272-NyeTAR.A004  | contig022354-TiITARs.A037 | 0.365 | 0.997 | 0.367 |
| contig059766-BurTARs.A029 | contig040586-ZebTAR.A001  | 0.392 | 1.069 | 0.367 |
| contig039640-TiITAR.A002  | contig007520-TiITARs.A025 | 0.432 | 1.178 | 0.367 |
| contig049534-BurTARs.A025 | contig066330-ZebTARs.A027 | 0.331 | 0.902 | 0.367 |
| contig057148-BurTARs.A028 | contig059768-ZebTARs.A022 | 0.367 | 1.000 | 0.367 |
| contig038663-NyeTAR.A005  | contig053139-ZebTARs.A023 | 0.420 | 1.144 | 0.367 |
| contig022382-TiITARs.A053 | contig040586-ZebTAR.A001  | 0.420 | 1.144 | 0.367 |
| contig022357-TiITARs.A041 | contig003909-ZebTAR.A003  | 0.399 | 1.087 | 0.367 |
| contig046007-NyeTARs.A017 | contig022353-TiITARs.A036 | 0.099 | 0.269 | 0.367 |
| contig039639-TiITAR.A001  | contig030440-ZebTARs.A029 | 0.381 | 1.038 | 0.367 |
| contig045302-BurTAR.A001  | contig059766-BurTARs.A029 | 0.397 | 1.083 | 0.367 |
| contig039642-TiITAR.A004  | contig022334-TiITARs.A029 | 0.423 | 1.154 | 0.367 |
| contig032272-NyeTAR.A004  | contig022357-TiITARs.A041 | 0.394 | 1.073 | 0.367 |
| contig022330-TiITARs.A028 | contig022356-TiITARs.A040 | 0.100 | 0.272 | 0.367 |
| contig020038-BurTAR.A002  | contig060105-NyeTARs.A018 | 0.348 | 0.947 | 0.367 |
| contig057305-BurTARs.A031 | contig053145-ZebTARs.A028 | 0.274 | 0.747 | 0.367 |
| contig022334-TiITARs.A029 | contig022355-TiITARs.A039 | 0.105 | 0.287 | 0.367 |
| contig007512-TiITARs.A024 | contig040586-ZebTAR.A002  | 0.400 | 1.089 | 0.367 |
| contig022355-TiITARs.A039 | contig053139-ZebTARs.A023 | 0.306 | 0.834 | 0.367 |
| contig046013-NyeTARs.A021 | contig040586-ZebTAR.A002  | 0.440 | 1.198 | 0.367 |
| contig007512-TiITARs.A024 | contig030464-ZebTARs.A025 | 0.338 | 0.920 | 0.367 |
| contig059766-BurTARs.A029 | contig038663-NyeTAR.A005  | 0.401 | 1.091 | 0.367 |
| contig059673-BurTARs.A016 | contig059766-BurTARs.A029 | 0.253 | 0.689 | 0.367 |
| contig055697-BurTARs.A022 | contig022368-TiITARs.A046 | 0.311 | 0.848 | 0.367 |
| contig022368-TiITARs.A047 | contig066330-ZebTARs.A027 | 0.333 | 0.905 | 0.367 |
| contig039640-TiITAR.A003  | contig062676-ZebTARs.A019 | 0.385 | 1.049 | 0.367 |
| contig066890-ZebTARs.A014 | contig053139-ZebTARs.A023 | 0.274 | 0.746 | 0.368 |
| contig045302-BurTAR.A001  | contig046014-NyeTARs.A024 | 0.425 | 1.155 | 0.368 |

|                           |                           |       |       |       |
|---------------------------|---------------------------|-------|-------|-------|
| contig032272-NyeTAR.A004  | contig022353-TiITARs.A036 | 0.424 | 1.153 | 0.368 |
| contig007512-TiITARs.A024 | contig066890-ZebTARs.A014 | 0.279 | 0.758 | 0.368 |
| contig086344-BriTARs.A020 | contig056200-NyeTARs.A029 | 0.324 | 0.882 | 0.368 |
| contig056020-BurTARs.A021 | contig061417-ZebTARs.A020 | 0.115 | 0.313 | 0.368 |
| contig046007-NyeTARs.A017 | contig022377-TiITARs.A050 | 0.141 | 0.383 | 0.368 |
| contig039640-TiITAR.A002  | contig022357-TiITARs.A041 | 0.421 | 1.146 | 0.368 |
| contig086337-BriTARs.A019 | contig022390-TiITARs.A055 | 0.283 | 0.769 | 0.368 |
| contig056020-BurTARs.A021 | contig056134-TiITARs.A058 | 0.333 | 0.906 | 0.368 |
| contig041024-BurTARs.A026 | contig022368-TiITARs.A046 | 0.105 | 0.287 | 0.368 |
| contig022345-TiITARs.A034 | contig030464-ZebTARs.A025 | 0.137 | 0.372 | 0.368 |
| contig084886-BriTARs.A017 | contig040586-ZebTAR.A001  | 0.446 | 1.213 | 0.368 |
| contig035376-NyeTARs.A014 | contig066056-ZebTARs.A017 | 0.314 | 0.855 | 0.368 |
| contig054630-BurTARs.A023 | contig057148-BurTARs.A028 | 0.379 | 1.030 | 0.368 |
| contig022378-TiITARs.A051 | contig056134-TiITARs.A058 | 0.292 | 0.793 | 0.368 |
| contig022365-TiITARs.A045 | contig053139-ZebTARs.A023 | 0.316 | 0.859 | 0.368 |
| contig084887-BriTARs.A018 | contig053139-ZebTARs.A023 | 0.320 | 0.869 | 0.368 |
| contig035376-NyeTARs.A014 | contig007512-TiITARs.A024 | 0.275 | 0.747 | 0.368 |
| contig045302-BurTAR.A001  | contig062677-ZebTARs.A018 | 0.404 | 1.099 | 0.368 |
| contig060707-BurTARs.A015 | contig060292-NyeTARs.A027 | 0.283 | 0.770 | 0.368 |
| contig029633-BriTAR.A003  | contig055697-BurTARs.A022 | 0.423 | 1.150 | 0.368 |
| contig082565-BriTARs.A022 | contig062039-NyeTARs.A022 | 0.208 | 0.564 | 0.368 |
| contig039640-TiITAR.A002  | contig022353-TiITARs.A036 | 0.451 | 1.225 | 0.368 |
| contig057148-BurTARs.A028 | contig066056-ZebTARs.A017 | 0.323 | 0.878 | 0.368 |
| contig058002-NyeTARs.A025 | contig007520-TiITARs.A025 | 0.018 | 0.050 | 0.368 |
| contig084868-BriTARs.A014 | contig039640-TiITAR.A002  | 0.382 | 1.037 | 0.368 |
| contig084868-BriTARs.A014 | contig066330-ZebTARs.A027 | 0.294 | 0.797 | 0.368 |
| contig046014-NyeTARs.A024 | contig022377-TiITARs.A050 | 0.127 | 0.344 | 0.368 |
| contig022343-TiITARs.A033 | contig022354-TiITARs.A038 | 0.115 | 0.312 | 0.368 |
| contig056020-BurTARs.A021 | contig040586-ZebTAR.A001  | 0.443 | 1.202 | 0.368 |
| contig086351-BriTARs.A021 | contig053145-ZebTARs.A028 | 0.273 | 0.742 | 0.368 |
| contig086337-BriTARs.A019 | contig059673-BurTARs.A016 | 0.245 | 0.666 | 0.368 |
| contig039639-TiITAR.A001  | contig007518-TiITARs.A019 | 0.466 | 1.265 | 0.368 |
| contig061977-BurTARs.A012 | contig062676-ZebTARs.A019 | 0.131 | 0.355 | 0.368 |
| contig066890-ZebTARs.A014 | contig059768-ZebTARs.A022 | 0.337 | 0.914 | 0.369 |
| contig055697-BurTARs.A022 | contig034854-BurTARs.A027 | 0.292 | 0.793 | 0.369 |
| contig022324-TiITARs.A027 | contig022377-TiITARs.A050 | 0.142 | 0.385 | 0.369 |
| contig066285-ZebTARs.A016 | contig053139-ZebTARs.A023 | 0.329 | 0.893 | 0.369 |
| contig056134-TiITARs.A058 | contig066330-ZebTARs.A027 | 0.067 | 0.181 | 0.369 |
| contig057148-BurTARs.A028 | contig066285-ZebTARs.A016 | 0.168 | 0.456 | 0.369 |
| contig040586-ZebTAR.A002  | contig053145-ZebTARs.A028 | 0.387 | 1.050 | 0.369 |
| contig022349-TiITARs.A035 | contig022390-TiITARs.A055 | 0.212 | 0.574 | 0.369 |
| contig020038-BurTAR.A002  | contig022355-TiITARs.A039 | 0.394 | 1.067 | 0.369 |
| contig065494-BurTARs.A030 | contig058002-NyeTARs.A025 | 0.247 | 0.670 | 0.369 |
| contig045302-BurTAR.A001  | contig022320-TiITARs.A059 | 0.427 | 1.158 | 0.369 |
| contig055697-BurTARs.A022 | contig057148-BurTARs.A028 | 0.332 | 0.899 | 0.369 |
| contig084868-BriTARs.A014 | contig007518-TiITARs.A019 | 0.361 | 0.978 | 0.369 |
| contig039640-TiITAR.A002  | contig022383-TiITARs.A054 | 0.380 | 1.030 | 0.369 |
| contig039640-TiITAR.A003  | contig022379-TiITARs.A052 | 0.401 | 1.087 | 0.369 |
| contig049534-BurTARs.A025 | contig007512-TiITARs.A024 | 0.342 | 0.927 | 0.369 |
| contig055697-BurTARs.A022 | contig022349-TiITARs.A035 | 0.327 | 0.885 | 0.369 |
| contig086337-BriTARs.A019 | contig045302-BurTAR.A001  | 0.416 | 1.126 | 0.369 |
| contig084886-BriTARs.A017 | contig032272-NyeTAR.A004  | 0.385 | 1.042 | 0.369 |
| contig057145-BurTARs.A018 | contig022341-TiITARs.A032 | 0.133 | 0.359 | 0.369 |

|                           |                           |       |       |       |
|---------------------------|---------------------------|-------|-------|-------|
| contig056021-BurTARs.A020 | contig057148-BurTARs.A028 | 0.134 | 0.363 | 0.369 |
| contig035377-NyeTARs.A023 | contig053145-ZebTARs.A028 | 0.288 | 0.779 | 0.369 |
| contig060707-BurTARs.A015 | contig057145-BurTARs.A018 | 0.344 | 0.932 | 0.369 |
| contig022349-TiITARs.A035 | contig066056-ZebTARs.A017 | 0.339 | 0.918 | 0.370 |
| contig046007-NyeTARs.A017 | contig053145-ZebTARs.A028 | 0.324 | 0.877 | 0.370 |
| contig038663-NyeTAR.A005  | contig030464-ZebTARs.A025 | 0.461 | 1.248 | 0.370 |
| contig046014-NyeTARs.A024 | contig022354-TiITARs.A038 | 0.125 | 0.339 | 0.370 |
| contig061091-BurTARs.A014 | contig065494-BurTARs.A030 | 0.340 | 0.921 | 0.370 |
| contig058002-NyeTARs.A025 | contig022383-TiITARs.A054 | 0.303 | 0.821 | 0.370 |
| contig046014-NyeTARs.A024 | contig022365-TiITARs.A045 | 0.119 | 0.321 | 0.370 |
| contig007512-TiITARs.A024 | contig022349-TiITARs.A035 | 0.332 | 0.897 | 0.370 |
| contig056021-BurTARs.A020 | contig053145-ZebTARs.A028 | 0.329 | 0.891 | 0.370 |
| contig057148-BurTARs.A028 | contig040586-ZebTAR.A001  | 0.453 | 1.225 | 0.370 |
| contig022368-TiITARs.A047 | contig040586-ZebTAR.A002  | 0.434 | 1.174 | 0.370 |
| contig062039-NyeTARs.A022 | contig066330-ZebTARs.A027 | 0.285 | 0.771 | 0.370 |
| contig061433-BurTARs.A013 | contig040586-ZebTAR.A001  | 0.449 | 1.213 | 0.370 |
| contig086337-BriTARs.A019 | contig066285-ZebTARs.A016 | 0.330 | 0.892 | 0.370 |
| contig059766-BurTARs.A029 | contig030471-ZebTARs.A024 | 0.352 | 0.952 | 0.370 |
| contig007524-TiITARs.A026 | contig053145-ZebTARs.A028 | 0.242 | 0.653 | 0.370 |
| contig049534-BurTARs.A025 | contig066285-ZebTARs.A016 | 0.010 | 0.027 | 0.370 |
| contig007520-TiITARs.A025 | contig062676-ZebTARs.A019 | 0.309 | 0.836 | 0.370 |
| contig039639-TiITAR.A001  | contig061410-ZebTARs.A021 | 0.384 | 1.038 | 0.370 |
| contig045302-BurTAR.A001  | contig022330-TiITARs.A028 | 0.415 | 1.122 | 0.370 |
| contig058002-NyeTARs.A025 | contig039642-TiITAR.A004  | 0.425 | 1.148 | 0.370 |
| contig084868-BriTARs.A014 | contig058002-NyeTARs.A025 | 0.318 | 0.858 | 0.370 |
| contig061977-BurTARs.A012 | contig055697-BurTARs.A022 | 0.266 | 0.719 | 0.370 |
| contig022354-TiITARs.A038 | contig030464-ZebTARs.A025 | 0.020 | 0.054 | 0.370 |
| contig055697-BurTARs.A022 | contig022341-TiITARs.A032 | 0.314 | 0.848 | 0.370 |
| contig057145-BurTARs.A018 | contig022355-TiITARs.A039 | 0.111 | 0.300 | 0.370 |
| contig065494-BurTARs.A030 | contig022354-TiITARs.A037 | 0.312 | 0.842 | 0.370 |
| contig029633-BriTAR.A003  | contig022356-TiITARs.A040 | 0.434 | 1.171 | 0.370 |
| contig061977-BurTARs.A012 | contig046010-NyeTARs.A019 | 0.244 | 0.659 | 0.370 |
| contig022324-TiITARs.A027 | contig022330-TiITARs.A028 | 0.151 | 0.406 | 0.370 |
| contig020038-BurTAR.A002  | contig022353-TiITARs.A036 | 0.428 | 1.156 | 0.370 |
| contig058002-NyeTARs.A025 | contig066330-ZebTARs.A027 | 0.251 | 0.677 | 0.370 |
| contig054630-BurTARs.A023 | contig022349-TiITARs.A035 | 0.405 | 1.092 | 0.371 |
| contig049540-BurTARs.A024 | contig038663-NyeTAR.A005  | 0.412 | 1.113 | 0.371 |
| contig022324-TiITARs.A027 | contig066056-ZebTARs.A017 | 0.328 | 0.886 | 0.371 |
| contig022353-TiITARs.A036 | contig053139-ZebTARs.A023 | 0.303 | 0.817 | 0.371 |
| contig039640-TiITAR.A002  | contig030471-ZebTARs.A024 | 0.439 | 1.185 | 0.371 |
| contig061091-BurTARs.A014 | contig030471-ZebTARs.A024 | 0.066 | 0.177 | 0.371 |
| contig029633-BriTAR.A003  | contig066330-ZebTARs.A027 | 0.408 | 1.101 | 0.371 |
| contig054630-BurTARs.A023 | contig030440-ZebTARs.A029 | 0.344 | 0.927 | 0.371 |
| contig055697-BurTARs.A022 | contig061410-ZebTARs.A021 | 0.262 | 0.707 | 0.371 |
| contig065494-BurTARs.A030 | contig022378-TiITARs.A051 | 0.291 | 0.784 | 0.371 |
| contig039640-TiITAR.A003  | contig022324-TiITARs.A027 | 0.435 | 1.174 | 0.371 |
| contig022356-TiITARs.A040 | contig040586-ZebTAR.A001  | 0.432 | 1.164 | 0.371 |
| contig035375-NyeTARs.A013 | contig039639-TiITAR.A001  | 0.379 | 1.022 | 0.371 |
| contig065494-BurTARs.A030 | contig022353-TiITARs.A036 | 0.341 | 0.919 | 0.371 |
| contig055697-BurTARs.A022 | contig030440-ZebTARs.A029 | 0.274 | 0.739 | 0.371 |
| contig039640-TiITAR.A002  | contig022355-TiITARs.A039 | 0.424 | 1.144 | 0.371 |
| contig086351-BriTARs.A021 | contig056134-TiITARs.A058 | 0.302 | 0.813 | 0.371 |
| contig022341-TiITARs.A032 | contig053145-ZebTARs.A028 | 0.316 | 0.850 | 0.371 |

|                           |                           |       |       |       |
|---------------------------|---------------------------|-------|-------|-------|
| contig059766-BurTARs.A029 | contig022353-TiITARs.A036 | 0.336 | 0.906 | 0.371 |
| contig029633-BriTAR.A003  | contig022337-TiITARs.A031 | 0.458 | 1.233 | 0.371 |
| contig022378-TiITARs.A051 | contig066056-ZebTARs.A017 | 0.319 | 0.860 | 0.371 |
| contig059766-BurTARs.A029 | contig057305-BurTARs.A031 | 0.274 | 0.738 | 0.371 |
| contig084886-BriTARs.A017 | contig022354-TiITARs.A038 | 0.026 | 0.070 | 0.371 |
| contig059766-BurTARs.A029 | contig007524-TiITARs.A026 | 0.240 | 0.646 | 0.371 |
| contig082565-BriTARs.A022 | contig039639-TiITAR.A001  | 0.371 | 0.999 | 0.371 |
| contig062039-NyeTARs.A022 | contig062676-ZebTARs.A019 | 0.222 | 0.599 | 0.371 |
| contig059766-BurTARs.A029 | contig035377-NyeTARs.A023 | 0.290 | 0.780 | 0.371 |
| contig084886-BriTARs.A017 | contig003909-ZebTAR.A003  | 0.386 | 1.039 | 0.371 |
| contig060707-BurTARs.A015 | contig022383-TiITARs.A054 | 0.299 | 0.805 | 0.371 |
| contig061417-ZebTARs.A020 | contig053145-ZebTARs.A028 | 0.324 | 0.871 | 0.371 |
| contig057148-BurTARs.A028 | contig022377-TiITARs.A050 | 0.150 | 0.405 | 0.372 |
| contig022390-TiITARs.A055 | contig022320-TiITARs.A059 | 0.206 | 0.555 | 0.372 |
| contig086337-BriTARs.A019 | contig046007-NyeTARs.A017 | 0.320 | 0.860 | 0.372 |
| contig086337-BriTARs.A019 | contig040586-ZebTAR.A001  | 0.413 | 1.111 | 0.372 |
| contig022334-TiITARs.A030 | contig061417-ZebTARs.A020 | 0.151 | 0.407 | 0.372 |
| contig022324-TiITARs.A027 | contig022362-TiITARs.A042 | 0.157 | 0.422 | 0.372 |
| contig022356-TiITARs.A040 | contig022362-TiITARs.A042 | 0.138 | 0.371 | 0.372 |
| contig029633-BriTAR.A003  | contig022365-TiITARs.A045 | 0.447 | 1.203 | 0.372 |
| contig054630-BurTARs.A023 | contig035375-NyeTARs.A013 | 0.343 | 0.922 | 0.372 |
| contig084880-BriTARs.A016 | contig039640-TiITAR.A003  | 0.440 | 1.185 | 0.372 |
| contig046010-NyeTARs.A019 | contig061410-ZebTARs.A021 | 0.244 | 0.657 | 0.372 |
| contig022334-TiITARs.A030 | contig022345-TiITARs.A034 | 0.154 | 0.414 | 0.372 |
| contig060707-BurTARs.A015 | contig062677-ZebTARs.A018 | 0.321 | 0.864 | 0.372 |
| contig023443-TiITAR.A005  | contig022355-TiITARs.A039 | 0.370 | 0.996 | 0.372 |
| contig022334-TiITARs.A030 | contig030445-ZebTARs.A026 | 0.217 | 0.583 | 0.372 |
| contig007512-TiITARs.A024 | contig022330-TiITARs.A028 | 0.320 | 0.860 | 0.372 |
| contig035381-NyeTARs.A015 | contig039640-TiITAR.A002  | 0.373 | 1.002 | 0.372 |
| contig022345-TiITARs.A034 | contig022390-TiITARs.A055 | 0.259 | 0.695 | 0.372 |
| contig066285-ZebTARs.A016 | contig066056-ZebTARs.A017 | 0.322 | 0.865 | 0.372 |
| contig057305-BurTARs.A031 | contig056134-TiITARs.A058 | 0.305 | 0.819 | 0.372 |
| contig022337-TiITARs.A031 | contig030471-ZebTARs.A024 | 0.121 | 0.325 | 0.372 |
| contig086337-BriTARs.A019 | contig022368-TiITARs.A046 | 0.313 | 0.841 | 0.372 |
| contig039639-TiITAR.A001  | contig022324-TiITARs.A027 | 0.457 | 1.228 | 0.372 |
| contig057148-BurTARs.A028 | contig022383-TiITARs.A054 | 0.252 | 0.678 | 0.372 |
| contig022365-TiITARs.A045 | contig053145-ZebTARs.A028 | 0.313 | 0.841 | 0.372 |
| contig061977-BurTARs.A012 | contig022334-TiITARs.A030 | 0.210 | 0.564 | 0.372 |
| contig029633-BriTAR.A003  | contig053139-ZebTARs.A023 | 0.422 | 1.133 | 0.372 |
| contig049534-BurTARs.A025 | contig022390-TiITARs.A055 | 0.262 | 0.704 | 0.372 |
| contig035381-NyeTARs.A015 | contig066056-ZebTARs.A017 | 0.307 | 0.824 | 0.372 |
| contig084868-BriTARs.A014 | contig060707-BurTARs.A015 | 0.305 | 0.818 | 0.372 |
| contig038663-NyeTAR.A005  | contig062677-ZebTARs.A018 | 0.415 | 1.114 | 0.372 |
| contig082565-BriTARs.A022 | contig060707-BurTARs.A015 | 0.303 | 0.814 | 0.372 |
| contig039640-TiITAR.A002  | contig022345-TiITARs.A034 | 0.395 | 1.061 | 0.372 |
| contig049534-BurTARs.A025 | contig066056-ZebTARs.A017 | 0.319 | 0.856 | 0.372 |
| contig022390-TiITARs.A056 | contig056134-TiITARs.A058 | 0.306 | 0.822 | 0.373 |
| contig086351-BriTARs.A021 | contig059766-BurTARs.A029 | 0.273 | 0.733 | 0.373 |
| contig022330-TiITARs.A028 | contig022334-TiITARs.A030 | 0.148 | 0.396 | 0.373 |
| contig020038-BurTAR.A002  | contig022354-TiITARs.A037 | 0.367 | 0.986 | 0.373 |
| contig084887-BriTARs.A018 | contig007512-TiITARs.A024 | 0.335 | 0.899 | 0.373 |
| contig086344-BriTARs.A020 | contig022341-TiITARs.A032 | 0.336 | 0.901 | 0.373 |
| contig056021-BurTARs.A020 | contig022320-TiITARs.A059 | 0.107 | 0.286 | 0.373 |

|                           |                           |       |       |       |
|---------------------------|---------------------------|-------|-------|-------|
| contig029633-BriTARs.A003 | contig045088-TiITARs.A057 | 0.459 | 1.230 | 0.373 |
| contig022334-TiITARs.A030 | contig022379-TiITARs.A052 | 0.211 | 0.566 | 0.373 |
| contig046011-NyeTARs.A016 | contig039640-TiITAR.A003  | 0.493 | 1.322 | 0.373 |
| contig054630-BurTARs.A023 | contig035377-NyeTARs.A023 | 0.342 | 0.917 | 0.373 |
| contig022379-TiITARs.A052 | contig040586-ZebTAR.A002  | 0.417 | 1.119 | 0.373 |
| contig035381-NyeTARs.A015 | contig056134-TiITARs.A058 | 0.273 | 0.732 | 0.373 |
| contig059766-BurTARs.A029 | contig022363-TiITARs.A043 | 0.356 | 0.954 | 0.373 |
| contig065494-BurTARs.A030 | contig022363-TiITARs.A043 | 0.356 | 0.954 | 0.373 |
| contig040586-ZebTAR.A002  | contig066285-ZebTARs.A016 | 0.443 | 1.187 | 0.373 |
| contig084876-BriTARs.A015 | contig039639-TiITAR.A001  | 0.398 | 1.066 | 0.373 |
| contig057145-BurTARs.A018 | contig022320-TiITARs.A059 | 0.112 | 0.301 | 0.373 |
| contig045302-BurTAR.A001  | contig022341-TiITARs.A032 | 0.424 | 1.136 | 0.373 |
| contig086337-BriTARs.A019 | contig056020-BurTARs.A021 | 0.338 | 0.905 | 0.374 |
| contig039639-TiITAR.A001  | contig062676-ZebTARs.A019 | 0.381 | 1.020 | 0.374 |
| contig084887-BriTARs.A018 | contig022375-TiITARs.A048 | 0.131 | 0.351 | 0.374 |
| contig059673-BurTARs.A016 | contig065494-BurTARs.A030 | 0.260 | 0.696 | 0.374 |
| contig084887-BriTARs.A018 | contig086337-BriTARs.A019 | 0.322 | 0.861 | 0.374 |
| contig059673-BurTARs.A016 | contig066056-ZebTARs.A017 | 0.301 | 0.805 | 0.374 |
| contig086337-BriTARs.A019 | contig066890-ZebTARs.A014 | 0.273 | 0.732 | 0.374 |
| contig056021-BurTARs.A020 | contig059766-BurTARs.A029 | 0.334 | 0.892 | 0.374 |
| contig022330-TiITARs.A028 | contig022355-TiITARs.A039 | 0.107 | 0.286 | 0.374 |
| contig084886-BriTARs.A017 | contig007512-TiITARs.A024 | 0.330 | 0.882 | 0.374 |
| contig055697-BurTARs.A022 | contig022382-TiITARs.A053 | 0.297 | 0.796 | 0.374 |
| contig055697-BurTARs.A022 | contig022324-TiITARs.A027 | 0.325 | 0.868 | 0.374 |
| contig046010-NyeTARs.A019 | contig059768-ZebTARs.A022 | 0.369 | 0.987 | 0.374 |
| contig061977-BurTARs.A012 | contig039640-TiITAR.A003  | 0.377 | 1.007 | 0.374 |
| contig049534-BurTARs.A025 | contig032272-NyeTAR.A004  | 0.392 | 1.048 | 0.374 |
| contig022363-TiITARs.A043 | contig022320-TiITARs.A059 | 0.132 | 0.353 | 0.374 |
| contig056020-BurTARs.A021 | contig007518-TiITARs.A019 | 0.367 | 0.980 | 0.374 |
| contig084876-BriTARs.A015 | contig066056-ZebTARs.A017 | 0.315 | 0.843 | 0.374 |
| contig084887-BriTARs.A018 | contig007518-TiITARs.A019 | 0.359 | 0.960 | 0.374 |
| contig059673-BurTARs.A016 | contig066330-ZebTARs.A027 | 0.259 | 0.693 | 0.374 |
| contig058002-NyeTARs.A025 | contig062676-ZebTARs.A019 | 0.310 | 0.828 | 0.374 |
| contig022334-TiITARs.A029 | contig030471-ZebTARs.A024 | 0.108 | 0.289 | 0.374 |
| contig055697-BurTARs.A022 | contig022390-TiITARs.A056 | 0.285 | 0.762 | 0.374 |
| contig060292-NyeTARs.A027 | contig053145-ZebTARs.A028 | 0.272 | 0.727 | 0.374 |
| contig046011-NyeTARs.A016 | contig039639-TiITAR.A001  | 0.503 | 1.344 | 0.374 |
| contig061977-BurTARs.A012 | contig053139-ZebTARs.A023 | 0.261 | 0.698 | 0.374 |
| contig046010-NyeTARs.A019 | contig066056-ZebTARs.A017 | 0.324 | 0.865 | 0.375 |
| contig023443-TiITAR.A005  | contig022377-TiITARs.A050 | 0.363 | 0.968 | 0.375 |
| contig060105-NyeTARs.A018 | contig022378-TiITARs.A051 | 0.318 | 0.847 | 0.375 |
| contig061433-BurTARs.A013 | contig022355-TiITARs.A039 | 0.157 | 0.419 | 0.375 |
| contig084887-BriTARs.A018 | contig022334-TiITARs.A029 | 0.106 | 0.282 | 0.375 |
| contig046013-NyeTARs.A021 | contig039640-TiITAR.A002  | 0.424 | 1.130 | 0.375 |
| contig057148-BurTARs.A028 | contig045088-TiITARs.A057 | 0.372 | 0.992 | 0.375 |
| contig022324-TiITARs.A027 | contig022363-TiITARs.A044 | 0.186 | 0.497 | 0.375 |
| contig059766-BurTARs.A029 | contig065494-BurTARs.A030 | 0.011 | 0.030 | 0.375 |
| contig022337-TiITARs.A031 | contig022357-TiITARs.A041 | 0.136 | 0.362 | 0.375 |
| contig066691-ZebTARs.A015 | contig066330-ZebTARs.A027 | 0.350 | 0.934 | 0.375 |
| contig059766-BurTARs.A029 | contig040586-ZebTAR.A002  | 0.383 | 1.021 | 0.375 |
| contig041024-BurTARs.A026 | contig022334-TiITARs.A029 | 0.106 | 0.283 | 0.375 |
| contig086344-BriTARs.A020 | contig058002-NyeTARs.A025 | 0.300 | 0.799 | 0.375 |
| contig022354-TiITARs.A037 | contig053145-ZebTARs.A028 | 0.309 | 0.823 | 0.375 |



|                           |                           |       |       |       |
|---------------------------|---------------------------|-------|-------|-------|
| contig086337-BriTARs.A019 | contig057148-BurTARs.A028 | 0.339 | 0.903 | 0.375 |
| contig054630-BurTARs.A023 | contig046010-NyeTARs.A019 | 0.382 | 1.017 | 0.375 |
| contig061977-BurTARs.A012 | contig022341-TiITARs.A032 | 0.229 | 0.610 | 0.375 |
| contig055697-BurTARs.A022 | contig030471-ZebTARs.A024 | 0.347 | 0.926 | 0.375 |
| contig059673-BurTARs.A016 | contig039640-TiITAR.A003  | 0.453 | 1.209 | 0.375 |
| contig020038-BurTAR.A002  | contig022357-TiITARs.A041 | 0.398 | 1.061 | 0.375 |
| contig061977-BurTARs.A012 | contig060707-BurTARs.A015 | 0.305 | 0.812 | 0.375 |
| contig045302-BurTAR.A001  | contig061091-BurTARs.A014 | 0.428 | 1.141 | 0.375 |
| contig059766-BurTARs.A029 | contig022341-TiITARs.A032 | 0.320 | 0.852 | 0.375 |
| contig022356-TiITARs.A040 | contig066285-ZebTARs.A016 | 0.152 | 0.406 | 0.375 |
| contig060707-BurTARs.A015 | contig030445-ZebTARs.A026 | 0.305 | 0.813 | 0.375 |
| contig049534-BurTARs.A025 | contig022365-TiITARs.A045 | 0.143 | 0.381 | 0.376 |
| contig055697-BurTARs.A022 | contig046010-NyeTARs.A019 | 0.332 | 0.885 | 0.376 |
| contig049534-BurTARs.A025 | contig040586-ZebTAR.A002  | 0.443 | 1.181 | 0.376 |
| contig057145-BurTARs.A018 | contig022365-TiITARs.A045 | 0.143 | 0.380 | 0.376 |
| contig046007-NyeTARs.A017 | contig040586-ZebTAR.A001  | 0.442 | 1.176 | 0.376 |
| contig059766-BurTARs.A029 | contig046007-NyeTARs.A017 | 0.330 | 0.878 | 0.376 |
| contig059766-BurTARs.A029 | contig061417-ZebTARs.A020 | 0.328 | 0.873 | 0.376 |
| contig007512-TiITARs.A024 | contig022363-TiITARs.A043 | 0.347 | 0.923 | 0.376 |
| contig007512-TiITARs.A024 | contig022375-TiITARs.A048 | 0.309 | 0.822 | 0.376 |
| contig065494-BurTARs.A030 | contig030471-ZebTARs.A024 | 0.356 | 0.946 | 0.376 |
| contig022330-TiITARs.A028 | contig040586-ZebTAR.A002  | 0.423 | 1.125 | 0.376 |
| contig061977-BurTARs.A012 | contig053145-ZebTARs.A028 | 0.261 | 0.693 | 0.376 |
| contig039640-TiITAR.A003  | contig007518-TiITARs.A019 | 0.458 | 1.219 | 0.376 |
| contig007512-TiITARs.A024 | contig066285-ZebTARs.A016 | 0.345 | 0.918 | 0.376 |
| contig022349-TiITARs.A035 | contig059768-ZebTARs.A022 | 0.398 | 1.058 | 0.376 |
| contig022368-TiITARs.A046 | contig053139-ZebTARs.A023 | 0.317 | 0.842 | 0.376 |
| contig046010-NyeTARs.A019 | contig066285-ZebTARs.A016 | 0.164 | 0.437 | 0.376 |
| contig022345-TiITARs.A034 | contig022363-TiITARs.A043 | 0.131 | 0.348 | 0.376 |
| contig061977-BurTARs.A012 | contig057145-BurTARs.A018 | 0.238 | 0.632 | 0.376 |
| contig040586-ZebTAR.A002  | contig053139-ZebTARs.A023 | 0.405 | 1.077 | 0.376 |
| contig086337-BriTARs.A019 | contig022349-TiITARs.A035 | 0.329 | 0.874 | 0.376 |
| contig039642-TiITAR.A004  | contig022353-TiITARs.A036 | 0.457 | 1.215 | 0.376 |
| contig046007-NyeTARs.A017 | contig007518-TiITARs.A019 | 0.365 | 0.971 | 0.376 |
| contig057301-BurTARs.A017 | contig053145-ZebTARs.A028 | 0.281 | 0.746 | 0.376 |
| contig022375-TiITARs.A048 | contig053139-ZebTARs.A023 | 0.304 | 0.809 | 0.376 |
| contig057148-BurTARs.A028 | contig042499-NyeTARs.A028 | 0.366 | 0.973 | 0.376 |
| contig022330-TiITARs.A028 | contig040586-ZebTAR.A001  | 0.421 | 1.119 | 0.376 |
| contig066056-ZebTARs.A017 | contig030464-ZebTARs.A025 | 0.326 | 0.867 | 0.376 |
| contig035381-NyeTARs.A015 | contig022334-TiITARs.A030 | 0.223 | 0.592 | 0.376 |
| contig065494-BurTARs.A030 | contig057305-BurTARs.A031 | 0.278 | 0.739 | 0.377 |
| contig086344-BriTARs.A020 | contig049540-BurTARs.A024 | 0.325 | 0.864 | 0.377 |
| contig022353-TiITARs.A036 | contig030464-ZebTARs.A025 | 0.140 | 0.372 | 0.377 |
| contig022375-TiITARs.A048 | contig040586-ZebTAR.A002  | 0.407 | 1.082 | 0.377 |
| contig059766-BurTARs.A029 | contig022365-TiITARs.A045 | 0.317 | 0.843 | 0.377 |
| contig084880-BriTARs.A016 | contig039640-TiITAR.A002  | 0.465 | 1.235 | 0.377 |
| contig061977-BurTARs.A012 | contig030464-ZebTARs.A025 | 0.248 | 0.659 | 0.377 |
| contig049534-BurTARs.A025 | contig057148-BurTARs.A028 | 0.168 | 0.446 | 0.377 |
| contig025313-BriTAR.A002  | contig022357-TiITARs.A041 | 0.401 | 1.064 | 0.377 |
| contig059766-BurTARs.A029 | contig022354-TiITARs.A037 | 0.311 | 0.825 | 0.377 |
| contig060707-BurTARs.A015 | contig058002-NyeTARs.A025 | 0.296 | 0.785 | 0.377 |
| contig029633-BriTAR.A003  | contig056020-BurTARs.A021 | 0.508 | 1.347 | 0.377 |
| contig059673-BurTARs.A016 | contig055697-BurTARs.A022 | 0.259 | 0.686 | 0.377 |

|                           |                           |       |       |       |
|---------------------------|---------------------------|-------|-------|-------|
| contig055697-BurTARs.A022 | contig022354-TiITARs.A038 | 0.323 | 0.857 | 0.377 |
| contig086337-BriTARs.A019 | contig035376-NyeTARs.A014 | 0.274 | 0.727 | 0.377 |
| contig035377-NyeTARs.A023 | contig059768-ZebTARs.A022 | 0.336 | 0.891 | 0.377 |
| contig065494-BurTARs.A030 | contig040586-ZebTAR.A001  | 0.390 | 1.035 | 0.377 |
| contig022324-TiITARs.A027 | contig030471-ZebTARs.A024 | 0.155 | 0.410 | 0.377 |
| contig055697-BurTARs.A022 | contig022363-TiITARs.A043 | 0.354 | 0.939 | 0.377 |
| contig007512-TiITARs.A024 | contig022334-TiITARs.A030 | 0.342 | 0.907 | 0.377 |
| contig022324-TiITARs.A027 | contig003909-ZebTAR.A003  | 0.409 | 1.083 | 0.377 |
| contig007512-TiITARs.A024 | contig022368-TiITARs.A046 | 0.313 | 0.830 | 0.377 |
| contig035381-NyeTARs.A015 | contig039639-TiITAR.A001  | 0.374 | 0.993 | 0.377 |
| contig084868-BriTARs.A014 | contig061977-BurTARs.A012 | 0.151 | 0.399 | 0.377 |
| contig046007-NyeTARs.A017 | contig066330-ZebTARs.A027 | 0.328 | 0.869 | 0.377 |
| contig022354-TiITARs.A037 | contig066330-ZebTARs.A027 | 0.316 | 0.838 | 0.377 |
| contig045302-BurTAR.A001  | contig065494-BurTARs.A030 | 0.395 | 1.047 | 0.377 |
| contig056134-TiITARs.A058 | contig022320-TiITARs.A059 | 0.332 | 0.880 | 0.377 |
| contig056021-BurTARs.A020 | contig046010-NyeTARs.A019 | 0.135 | 0.356 | 0.377 |
| contig056020-BurTARs.A021 | contig022356-TiITARs.A040 | 0.117 | 0.311 | 0.378 |
| contig084868-BriTARs.A014 | contig062039-NyeTARs.A022 | 0.232 | 0.615 | 0.378 |
| contig061433-BurTARs.A013 | contig022341-TiITARs.A032 | 0.163 | 0.432 | 0.378 |
| contig039639-TiITAR.A001  | contig045088-TiITARs.A057 | 0.454 | 1.203 | 0.378 |
| contig065494-BurTARs.A030 | contig061417-ZebTARs.A020 | 0.337 | 0.893 | 0.378 |
| contig053139-ZebTARs.A023 | contig030440-ZebTARs.A029 | 0.274 | 0.726 | 0.378 |
| contig065494-BurTARs.A030 | contig007524-TiITARs.A026 | 0.246 | 0.652 | 0.378 |
| contig022324-TiITARs.A027 | contig053139-ZebTARs.A023 | 0.320 | 0.846 | 0.378 |
| contig061091-BurTARs.A014 | contig038663-NyeTAR.A005  | 0.442 | 1.170 | 0.378 |
| contig030471-ZebTARs.A024 | contig066330-ZebTARs.A027 | 0.356 | 0.941 | 0.378 |
| contig035376-NyeTARs.A014 | contig022334-TiITARs.A030 | 0.222 | 0.589 | 0.378 |
| contig084886-BriTARs.A017 | contig020038-BurTAR.A002  | 0.389 | 1.031 | 0.378 |
| contig022349-TiITARs.A035 | contig053139-ZebTARs.A023 | 0.332 | 0.878 | 0.378 |
| contig040586-ZebTAR.A002  | contig066691-ZebTARs.A015 | 0.444 | 1.175 | 0.378 |
| contig054630-BurTARs.A023 | contig030464-ZebTARs.A025 | 0.384 | 1.016 | 0.378 |
| contig029633-BriTAR.A003  | contig022363-TiITARs.A044 | 0.417 | 1.103 | 0.378 |
| contig086351-BriTARs.A021 | contig065494-BurTARs.A030 | 0.277 | 0.733 | 0.378 |
| contig022363-TiITARs.A044 | contig053145-ZebTARs.A028 | 0.315 | 0.833 | 0.378 |
| contig022378-TiITARs.A051 | contig066330-ZebTARs.A027 | 0.293 | 0.776 | 0.378 |
| contig086337-BriTARs.A019 | contig022341-TiITARs.A032 | 0.312 | 0.825 | 0.378 |
| contig056134-TiITARs.A058 | contig030445-ZebTARs.A026 | 0.269 | 0.712 | 0.378 |
| contig061433-BurTARs.A013 | contig039642-TiITAR.A004  | 0.447 | 1.182 | 0.378 |
| contig065494-BurTARs.A030 | contig038663-NyeTAR.A005  | 0.399 | 1.055 | 0.378 |
| contig022356-TiITARs.A040 | contig022320-TiITARs.A059 | 0.099 | 0.263 | 0.378 |
| contig086337-BriTARs.A019 | contig022345-TiITARs.A034 | 0.303 | 0.800 | 0.378 |
| contig022341-TiITARs.A032 | contig053139-ZebTARs.A023 | 0.312 | 0.824 | 0.378 |
| contig038663-NyeTAR.A005  | contig022382-TiITARs.A053 | 0.427 | 1.129 | 0.378 |
| contig022349-TiITARs.A035 | contig040586-ZebTAR.A001  | 0.441 | 1.165 | 0.378 |
| contig029633-BriTAR.A003  | contig086337-BriTARs.A019 | 0.421 | 1.112 | 0.378 |
| contig035375-NyeTARs.A013 | contig030440-ZebTARs.A029 | 0.012 | 0.032 | 0.378 |
| contig040586-ZebTAR.A001  | contig066691-ZebTARs.A015 | 0.442 | 1.169 | 0.379 |
| contig058002-NyeTARs.A025 | contig040586-ZebTAR.A001  | 0.428 | 1.131 | 0.379 |
| contig022330-TiITARs.A028 | contig053145-ZebTARs.A028 | 0.323 | 0.853 | 0.379 |
| contig046007-NyeTARs.A017 | contig022320-TiITARs.A059 | 0.111 | 0.293 | 0.379 |
| contig056021-BurTARs.A020 | contig055697-BurTARs.A022 | 0.324 | 0.855 | 0.379 |
| contig045302-BurTAR.A001  | contig022345-TiITARs.A034 | 0.399 | 1.055 | 0.379 |
| contig059766-BurTARs.A029 | contig060292-NyeTARs.A027 | 0.272 | 0.718 | 0.379 |

|                           |                           |       |       |       |
|---------------------------|---------------------------|-------|-------|-------|
| contig046007-NyeTARs.A017 | contig022354-TiITARs.A037 | 0.171 | 0.452 | 0.379 |
| contig057148-BurTARs.A028 | contig053139-ZebTARs.A023 | 0.336 | 0.886 | 0.379 |
| contig022343-TiITARs.A033 | contig059768-ZebTARs.A022 | 0.357 | 0.944 | 0.379 |
| contig084886-BriTARs.A017 | contig038663-NyeTAR.A005  | 0.453 | 1.196 | 0.379 |
| contig084887-BriTARs.A018 | contig022324-TiITARs.A027 | 0.168 | 0.443 | 0.379 |
| contig034854-BurTARs.A027 | contig053139-ZebTARs.A023 | 0.291 | 0.767 | 0.379 |
| contig046010-NyeTARs.A019 | contig040586-ZebTAR.A001  | 0.454 | 1.199 | 0.379 |
| contig057148-BurTARs.A028 | contig022341-TiITARs.A032 | 0.127 | 0.336 | 0.379 |
| contig046010-NyeTARs.A019 | contig022377-TiITARs.A050 | 0.147 | 0.387 | 0.379 |
| contig041024-BurTARs.A026 | contig022368-TiITARs.A047 | 0.119 | 0.314 | 0.379 |
| contig084887-BriTARs.A018 | contig041024-BurTARs.A026 | 0.104 | 0.275 | 0.379 |
| contig007524-TiITARs.A026 | contig066330-ZebTARs.A027 | 0.250 | 0.658 | 0.379 |
| contig061433-BurTARs.A013 | contig022365-TiITARs.A045 | 0.167 | 0.441 | 0.379 |
| contig007512-TiITARs.A024 | contig022353-TiITARs.A036 | 0.341 | 0.898 | 0.379 |
| contig066056-ZebTARs.A017 | contig062676-ZebTARs.A019 | 0.296 | 0.781 | 0.379 |
| contig055697-BurTARs.A022 | contig022330-TiITARs.A028 | 0.313 | 0.825 | 0.379 |
| contig040586-ZebTAR.A001  | contig066330-ZebTARs.A027 | 0.395 | 1.043 | 0.379 |
| contig061977-BurTARs.A012 | contig059768-ZebTARs.A022 | 0.303 | 0.798 | 0.379 |
| contig022341-TiITARs.A032 | contig061410-ZebTARs.A021 | 0.231 | 0.610 | 0.379 |
| contig029633-BriTAR.A003  | contig022355-TiITARs.A039 | 0.461 | 1.217 | 0.379 |
| contig045302-BurTAR.A001  | contig066330-ZebTARs.A027 | 0.400 | 1.056 | 0.379 |
| contig084887-BriTARs.A018 | contig022320-TiITARs.A059 | 0.112 | 0.295 | 0.379 |
| contig058002-NyeTARs.A025 | contig053139-ZebTARs.A023 | 0.241 | 0.635 | 0.379 |
| contig029633-BriTAR.A003  | contig058002-NyeTARs.A025 | 0.443 | 1.169 | 0.379 |
| contig039642-TiITAR.A004  | contig022377-TiITARs.A050 | 0.414 | 1.092 | 0.379 |
| contig025313-BriTAR.A002  | contig049534-BurTARs.A025 | 0.389 | 1.024 | 0.379 |
| contig046007-NyeTARs.A017 | contig059768-ZebTARs.A022 | 0.349 | 0.918 | 0.380 |
| contig086337-BriTARs.A019 | contig030471-ZebTARs.A024 | 0.354 | 0.932 | 0.380 |
| contig039640-TiITAR.A002  | contig007524-TiITARs.A026 | 0.440 | 1.158 | 0.380 |
| contig022345-TiITARs.A034 | contig061410-ZebTARs.A021 | 0.234 | 0.615 | 0.380 |
| contig084880-BriTARs.A016 | contig022334-TiITARs.A030 | 0.212 | 0.558 | 0.380 |
| contig022390-TiITARs.A056 | contig053139-ZebTARs.A023 | 0.287 | 0.755 | 0.380 |
| contig084886-BriTARs.A017 | contig022324-TiITARs.A027 | 0.161 | 0.425 | 0.380 |
| contig007512-TiITARs.A024 | contig022390-TiITARs.A056 | 0.294 | 0.774 | 0.380 |
| contig060707-BurTARs.A015 | contig062676-ZebTARs.A019 | 0.305 | 0.803 | 0.380 |
| contig049534-BurTARs.A025 | contig022356-TiITARs.A040 | 0.149 | 0.392 | 0.380 |
| contig057145-BurTARs.A018 | contig060105-NyeTARs.A018 | 0.350 | 0.922 | 0.380 |
| contig038663-NyeTAR.A005  | contig066330-ZebTARs.A027 | 0.404 | 1.064 | 0.380 |
| contig060292-NyeTARs.A027 | contig056134-TiITARs.A058 | 0.303 | 0.797 | 0.380 |
| contig058002-NyeTARs.A025 | contig040586-ZebTAR.A002  | 0.431 | 1.133 | 0.380 |
| contig060707-BurTARs.A015 | contig007524-TiITARs.A026 | 0.289 | 0.761 | 0.380 |
| contig038663-NyeTAR.A005  | contig022349-TiITARs.A035 | 0.443 | 1.165 | 0.380 |
| contig022341-TiITARs.A032 | contig022349-TiITARs.A035 | 0.133 | 0.351 | 0.380 |
| contig022368-TiITARs.A047 | contig066056-ZebTARs.A017 | 0.318 | 0.837 | 0.380 |
| contig060105-NyeTARs.A018 | contig007520-TiITARs.A025 | 0.286 | 0.753 | 0.380 |
| contig061433-BurTARs.A013 | contig038663-NyeTAR.A005  | 0.454 | 1.194 | 0.380 |
| contig055697-BurTARs.A022 | contig022345-TiITARs.A034 | 0.307 | 0.809 | 0.380 |
| contig049534-BurTARs.A025 | contig003909-ZebTAR.A003  | 0.392 | 1.032 | 0.380 |
| contig034854-BurTARs.A027 | contig039639-TiITAR.A001  | 0.375 | 0.985 | 0.380 |
| contig065494-BurTARs.A030 | contig040586-ZebTAR.A002  | 0.381 | 1.002 | 0.380 |
| contig039640-TiITAR.A003  | contig030445-ZebTARs.A026 | 0.367 | 0.964 | 0.380 |
| contig022353-TiITARs.A036 | contig059768-ZebTARs.A022 | 0.373 | 0.982 | 0.380 |
| contig022363-TiITARs.A043 | contig053139-ZebTARs.A023 | 0.349 | 0.917 | 0.380 |

|                           |                           |       |       |       |
|---------------------------|---------------------------|-------|-------|-------|
| contig086344-BriTARs.A020 | contig022382-TiTARs.A053  | 0.324 | 0.853 | 0.380 |
| contig084886-BriTARs.A017 | contig022343-TiTARs.A033  | 0.122 | 0.321 | 0.380 |
| contig056020-BurTARs.A021 | contig059768-ZebTARs.A022 | 0.351 | 0.921 | 0.380 |
| contig022363-TiTARs.A043  | contig022383-TiTARs.A054  | 0.280 | 0.735 | 0.381 |
| contig045302-BurTAR.A001  | contig022382-TiTARs.A053  | 0.419 | 1.100 | 0.381 |
| contig039642-TiTAR.A004   | contig022379-TiTARs.A052  | 0.407 | 1.069 | 0.381 |
| contig046014-NyeTARs.A024 | contig040586-ZebTAR.A001  | 0.431 | 1.132 | 0.381 |
| contig061091-BurTARs.A014 | contig039642-TiTAR.A004   | 0.437 | 1.147 | 0.381 |
| contig086344-BriTARs.A020 | contig061977-BurTARs.A012 | 0.303 | 0.796 | 0.381 |
| contig056021-BurTARs.A020 | contig065494-BurTARs.A030 | 0.342 | 0.897 | 0.381 |
| contig061433-BurTARs.A013 | contig022334-TiTARs.A030  | 0.211 | 0.553 | 0.381 |
| contig055697-BurTARs.A022 | contig030464-ZebTARs.A025 | 0.337 | 0.884 | 0.381 |
| contig057148-BurTARs.A028 | contig038663-NyeTAR.A005  | 0.460 | 1.208 | 0.381 |
| contig084868-BriTARs.A014 | contig086344-BriTARs.A020 | 0.316 | 0.828 | 0.381 |
| contig039640-TiTAR.A002   | contig022368-TiTARs.A047  | 0.423 | 1.109 | 0.381 |
| contig061977-BurTARs.A012 | contig059766-BurTARs.A029 | 0.265 | 0.694 | 0.381 |
| contig039640-TiTAR.A003   | contig045088-TiTARs.A057  | 0.457 | 1.199 | 0.381 |
| contig029633-BriTAR.A003  | contig022379-TiTARs.A052  | 0.424 | 1.112 | 0.381 |
| contig057145-BurTARs.A018 | contig022368-TiTARs.A046  | 0.140 | 0.369 | 0.381 |
| contig056020-BurTARs.A021 | contig038663-NyeTAR.A005  | 0.459 | 1.203 | 0.381 |
| contig022320-TiTARs.A059  | contig053145-ZebTARs.A028 | 0.313 | 0.822 | 0.381 |
| contig022382-TiTARs.A053  | contig062677-ZebTARs.A018 | 0.014 | 0.037 | 0.381 |
| contig060707-BurTARs.A015 | contig056200-NyeTARs.A029 | 0.322 | 0.846 | 0.381 |
| contig061091-BurTARs.A014 | contig066330-ZebTARs.A027 | 0.350 | 0.919 | 0.381 |
| contig039642-TiTAR.A004   | contig022341-TiTARs.A032  | 0.416 | 1.090 | 0.381 |
| contig055697-BurTARs.A022 | contig022363-TiTARs.A044  | 0.317 | 0.832 | 0.381 |
| contig045302-BurTAR.A001  | contig022349-TiTARs.A035  | 0.438 | 1.148 | 0.381 |
| contig029633-BriTAR.A003  | contig041024-BurTARs.A026 | 0.429 | 1.126 | 0.381 |
| contig022343-TiTARs.A033  | contig030471-ZebTARs.A024 | 0.110 | 0.290 | 0.382 |
| contig046010-NyeTARs.A019 | contig022349-TiTARs.A035  | 0.146 | 0.384 | 0.382 |
| contig035381-NyeTARs.A015 | contig022345-TiTARs.A034  | 0.242 | 0.634 | 0.382 |
| contig022354-TiTARs.A038  | contig066056-ZebTARs.A017 | 0.314 | 0.822 | 0.382 |
| contig057301-BurTARs.A017 | contig066330-ZebTARs.A027 | 0.287 | 0.751 | 0.382 |
| contig055697-BurTARs.A022 | contig061417-ZebTARs.A020 | 0.318 | 0.833 | 0.382 |
| contig057305-BurTARs.A031 | contig066330-ZebTARs.A027 | 0.284 | 0.744 | 0.382 |
| contig045302-BurTAR.A001  | contig022334-TiTARs.A029  | 0.428 | 1.122 | 0.382 |
| contig086337-BriTARs.A019 | contig046010-NyeTARs.A019 | 0.340 | 0.889 | 0.382 |
| contig022362-TiTARs.A042  | contig022320-TiTARs.A059  | 0.127 | 0.332 | 0.382 |
| contig065494-BurTARs.A030 | contig046007-NyeTARs.A017 | 0.332 | 0.868 | 0.382 |
| contig038663-NyeTAR.A005  | contig022356-TiTARs.A040  | 0.437 | 1.145 | 0.382 |
| contig022382-TiTARs.A053  | contig053139-ZebTARs.A023 | 0.297 | 0.777 | 0.382 |
| contig022320-TiTARs.A059  | contig040586-ZebTAR.A001  | 0.435 | 1.140 | 0.382 |
| contig007512-TiTARs.A024  | contig022334-TiTARs.A029  | 0.323 | 0.846 | 0.382 |
| contig084868-BriTARs.A014 | contig060105-NyeTARs.A018 | 0.310 | 0.812 | 0.382 |
| contig039640-TiTAR.A002   | contig045088-TiTARs.A057  | 0.459 | 1.203 | 0.382 |
| contig029633-BriTAR.A003  | contig057301-BurTARs.A017 | 0.464 | 1.215 | 0.382 |
| contig041024-BurTARs.A026 | contig022330-TiTARs.A028  | 0.108 | 0.282 | 0.382 |
| contig057145-BurTARs.A018 | contig022345-TiTARs.A034  | 0.116 | 0.305 | 0.382 |
| contig022341-TiTARs.A032  | contig040586-ZebTAR.A002  | 0.425 | 1.114 | 0.382 |
| contig057301-BurTARs.A017 | contig054630-BurTARs.A023 | 0.360 | 0.943 | 0.382 |
| contig086344-BriTARs.A020 | contig057305-BurTARs.A031 | 0.292 | 0.765 | 0.382 |
| contig061417-ZebTARs.A020 | contig066330-ZebTARs.A027 | 0.340 | 0.888 | 0.382 |
| contig022320-TiTARs.A059  | contig061417-ZebTARs.A020 | 0.107 | 0.280 | 0.382 |

|                           |                           |       |       |       |
|---------------------------|---------------------------|-------|-------|-------|
| contig022354-TiITARs.A038 | contig061410-ZebTARs.A021 | 0.231 | 0.604 | 0.382 |
| contig057301-BurTARs.A017 | contig065494-BurTARs.A030 | 0.286 | 0.749 | 0.382 |
| contig057301-BurTARs.A017 | contig056134-TiITARs.A058 | 0.305 | 0.797 | 0.382 |
| contig057301-BurTARs.A017 | contig039640-TiITAR.A003  | 0.456 | 1.193 | 0.382 |
| contig084886-BriTARs.A017 | contig066056-ZebTARs.A017 | 0.317 | 0.828 | 0.382 |
| contig061410-ZebTARs.A021 | contig053145-ZebTARs.A028 | 0.263 | 0.687 | 0.382 |
| contig061410-ZebTARs.A021 | contig053139-ZebTARs.A023 | 0.262 | 0.686 | 0.382 |
| contig054630-BurTARs.A023 | contig022357-TiITARs.A041 | 0.398 | 1.040 | 0.382 |
| contig086344-BriTARs.A020 | contig022383-TiITARs.A054 | 0.306 | 0.800 | 0.382 |
| contig042499-NyeTARs.A028 | contig059768-ZebTARs.A022 | 0.348 | 0.911 | 0.382 |
| contig056021-BurTARs.A020 | contig030464-ZebTARs.A025 | 0.136 | 0.356 | 0.383 |
| contig020038-BurTAR.A002  | contig049534-BurTARs.A025 | 0.397 | 1.037 | 0.383 |
| contig086351-BriTARs.A021 | contig066056-ZebTARs.A017 | 0.287 | 0.749 | 0.383 |
| contig060707-BurTARs.A015 | contig035381-NyeTARs.A015 | 0.307 | 0.803 | 0.383 |
| contig065494-BurTARs.A030 | contig035377-NyeTARs.A023 | 0.293 | 0.765 | 0.383 |
| contig065494-BurTARs.A030 | contig022365-TiITARs.A045 | 0.325 | 0.849 | 0.383 |
| contig022334-TiITARs.A029 | contig030464-ZebTARs.A025 | 0.135 | 0.354 | 0.383 |
| contig059766-BurTARs.A029 | contig022330-TiITARs.A028 | 0.327 | 0.854 | 0.383 |
| contig060105-NyeTARs.A018 | contig022379-TiITARs.A052 | 0.306 | 0.799 | 0.383 |
| contig059768-ZebTARs.A022 | contig030464-ZebTARs.A025 | 0.377 | 0.985 | 0.383 |
| contig040586-ZebTAR.A002  | contig066330-ZebTARs.A027 | 0.393 | 1.026 | 0.383 |
| contig060707-BurTARs.A015 | contig035376-NyeTARs.A014 | 0.315 | 0.822 | 0.383 |
| contig046013-NyeTARs.A021 | contig039642-TiITAR.A004  | 0.439 | 1.146 | 0.383 |
| contig022330-TiITARs.A028 | contig030464-ZebTARs.A025 | 0.133 | 0.348 | 0.383 |
| contig046010-NyeTARs.A019 | contig022341-TiITARs.A032 | 0.128 | 0.334 | 0.383 |
| contig042499-NyeTARs.A028 | contig053145-ZebTARs.A028 | 0.278 | 0.727 | 0.383 |
| contig029633-BriTAR.A003  | contig022362-TiITARs.A042 | 0.440 | 1.149 | 0.383 |
| contig086351-BriTARs.A021 | contig066330-ZebTARs.A027 | 0.283 | 0.739 | 0.383 |
| contig082565-BriTARs.A022 | contig022390-TiITARs.A055 | 0.032 | 0.083 | 0.383 |
| contig056134-TiITARs.A058 | contig066890-ZebTARs.A014 | 0.302 | 0.789 | 0.383 |
| contig086337-BriTARs.A019 | contig038663-NyeTAR.A005  | 0.422 | 1.101 | 0.383 |
| contig007520-TiITARs.A025 | contig022343-TiITARs.A033 | 0.335 | 0.875 | 0.383 |
| contig041024-BurTARs.A026 | contig022337-TiITARs.A031 | 0.137 | 0.356 | 0.383 |
| contig084868-BriTARs.A014 | contig022345-TiITARs.A034 | 0.252 | 0.658 | 0.383 |
| contig032272-NyeTAR.A004  | contig022324-TiITARs.A027 | 0.409 | 1.066 | 0.383 |
| contig039640-TiITAR.A002  | contig007518-TiITARs.A019 | 0.463 | 1.208 | 0.383 |
| contig035377-NyeTARs.A023 | contig039639-TiITAR.A001  | 0.410 | 1.071 | 0.383 |
| contig035376-NyeTARs.A014 | contig039640-TiITAR.A003  | 0.383 | 0.999 | 0.383 |
| contig022368-TiITARs.A046 | contig022377-TiITARs.A050 | 0.147 | 0.384 | 0.383 |
| contig061977-BurTARs.A012 | contig058002-NyeTARs.A025 | 0.298 | 0.778 | 0.383 |
| contig057301-BurTARs.A017 | contig059766-BurTARs.A029 | 0.282 | 0.737 | 0.383 |
| contig022343-TiITARs.A033 | contig040586-ZebTAR.A001  | 0.428 | 1.117 | 0.383 |
| contig059766-BurTARs.A029 | contig042499-NyeTARs.A028 | 0.275 | 0.717 | 0.383 |
| contig086337-BriTARs.A019 | contig022354-TiITARs.A038 | 0.330 | 0.862 | 0.383 |
| contig084880-BriTARs.A016 | contig040586-ZebTAR.A001  | 0.447 | 1.166 | 0.384 |
| contig029633-BriTAR.A003  | contig022368-TiITARs.A046 | 0.443 | 1.154 | 0.384 |
| contig041024-BurTARs.A026 | contig066056-ZebTARs.A017 | 0.301 | 0.785 | 0.384 |
| contig065494-BurTARs.A030 | contig042499-NyeTARs.A028 | 0.279 | 0.728 | 0.384 |
| contig055697-BurTARs.A022 | contig007520-TiITARs.A025 | 0.227 | 0.591 | 0.384 |
| contig059766-BurTARs.A029 | contig022390-TiITARs.A056 | 0.287 | 0.747 | 0.384 |
| contig046010-NyeTARs.A019 | contig061417-ZebTARs.A020 | 0.130 | 0.338 | 0.384 |
| contig086344-BriTARs.A020 | contig061410-ZebTARs.A021 | 0.307 | 0.800 | 0.384 |
| contig060105-NyeTARs.A018 | contig062677-ZebTARs.A018 | 0.323 | 0.841 | 0.384 |

|                           |                           |       |       |       |
|---------------------------|---------------------------|-------|-------|-------|
| contig061977-BurTARs.A012 | contig007520-TiITARs.A025 | 0.299 | 0.779 | 0.384 |
| contig054630-BurTARs.A023 | contig042499-NyeTARs.A028 | 0.349 | 0.910 | 0.384 |
| contig057145-BurTARs.A018 | contig046014-NyeTARs.A024 | 0.115 | 0.301 | 0.384 |
| contig049534-BurTARs.A025 | contig022354-TiITARs.A038 | 0.152 | 0.395 | 0.384 |
| contig022337-TiITARs.A031 | contig040586-ZebTAR.A001  | 0.441 | 1.148 | 0.384 |
| contig022362-TiITARs.A042 | contig022368-TiITARs.A046 | 0.038 | 0.100 | 0.384 |
| contig065494-BurTARs.A030 | contig060292-NyeTARs.A027 | 0.276 | 0.719 | 0.384 |
| contig055697-BurTARs.A022 | contig022379-TiITARs.A052 | 0.269 | 0.700 | 0.384 |
| contig035377-NyeTARs.A023 | contig066056-ZebTARs.A017 | 0.325 | 0.845 | 0.384 |
| contig061433-BurTARs.A013 | contig056021-BurTARs.A020 | 0.150 | 0.390 | 0.384 |
| contig057145-BurTARs.A018 | contig022375-TiITARs.A048 | 0.135 | 0.352 | 0.384 |
| contig086337-BriTARs.A019 | contig022330-TiITARs.A028 | 0.311 | 0.810 | 0.384 |
| contig057145-BurTARs.A018 | contig056021-BurTARs.A020 | 0.109 | 0.284 | 0.384 |
| contig049534-BurTARs.A025 | contig046010-NyeTARs.A019 | 0.164 | 0.427 | 0.384 |
| contig053139-ZebTARs.A023 | contig030471-ZebTARs.A024 | 0.353 | 0.918 | 0.384 |
| contig022390-TiITARs.A056 | contig053145-ZebTARs.A028 | 0.287 | 0.746 | 0.384 |
| contig029633-BriTAR.A003  | contig046007-NyeTARs.A017 | 0.475 | 1.234 | 0.385 |
| contig054630-BurTARs.A023 | contig022343-TiITARs.A033 | 0.364 | 0.946 | 0.385 |
| contig059766-BurTARs.A029 | contig022363-TiITARs.A044 | 0.316 | 0.821 | 0.385 |
| contig057148-BurTARs.A028 | contig061417-ZebTARs.A020 | 0.131 | 0.340 | 0.385 |
| contig060105-NyeTARs.A018 | contig030445-ZebTARs.A026 | 0.306 | 0.796 | 0.385 |
| contig065494-BurTARs.A030 | contig022324-TiITARs.A027 | 0.347 | 0.903 | 0.385 |
| contig022365-TiITARs.A045 | contig066330-ZebTARs.A027 | 0.325 | 0.844 | 0.385 |
| contig035381-NyeTARs.A015 | contig062039-NyeTARs.A022 | 0.207 | 0.537 | 0.385 |
| contig022355-TiITARs.A039 | contig040586-ZebTAR.A001  | 0.446 | 1.159 | 0.385 |
| contig023443-TiITAR.A005  | contig022357-TiITARs.A041 | 0.391 | 1.015 | 0.385 |
| contig065494-BurTARs.A030 | contig022390-TiITARs.A056 | 0.290 | 0.753 | 0.385 |
| contig057148-BurTARs.A028 | contig022362-TiITARs.A042 | 0.159 | 0.413 | 0.385 |
| contig056021-BurTARs.A020 | contig053139-ZebTARs.A023 | 0.323 | 0.839 | 0.385 |
| contig022355-TiITARs.A039 | contig056134-TiITARs.A058 | 0.337 | 0.876 | 0.385 |
| contig045302-BurTAR.A001  | contig022337-TiITARs.A031 | 0.439 | 1.140 | 0.385 |
| contig061433-BurTARs.A013 | contig057148-BurTARs.A028 | 0.165 | 0.429 | 0.385 |
| contig049534-BurTARs.A025 | contig023443-TiITAR.A005  | 0.387 | 1.006 | 0.385 |
| contig045088-TiITARs.A057 | contig040586-ZebTAR.A002  | 0.466 | 1.209 | 0.385 |
| contig086337-BriTARs.A019 | contig056021-BurTARs.A020 | 0.319 | 0.828 | 0.385 |
| contig084886-BriTARs.A017 | contig086337-BriTARs.A019 | 0.330 | 0.857 | 0.385 |
| contig035377-NyeTARs.A023 | contig022390-TiITARs.A056 | 0.045 | 0.117 | 0.385 |
| contig022390-TiITARs.A055 | contig066691-ZebTARs.A015 | 0.197 | 0.511 | 0.385 |
| contig061433-BurTARs.A013 | contig065494-BurTARs.A030 | 0.358 | 0.930 | 0.385 |
| contig022354-TiITARs.A038 | contig053139-ZebTARs.A023 | 0.322 | 0.837 | 0.385 |
| contig022334-TiITARs.A029 | contig040586-ZebTAR.A002  | 0.433 | 1.125 | 0.385 |
| contig057305-BurTARs.A031 | contig060105-NyeTARs.A018 | 0.285 | 0.740 | 0.385 |
| contig046010-NyeTARs.A019 | contig053139-ZebTARs.A023 | 0.336 | 0.873 | 0.385 |
| contig022357-TiITARs.A041 | contig040586-ZebTAR.A002  | 0.446 | 1.157 | 0.385 |
| contig057145-BurTARs.A018 | contig061410-ZebTARs.A021 | 0.240 | 0.622 | 0.385 |
| contig056021-BurTARs.A020 | contig066330-ZebTARs.A027 | 0.344 | 0.892 | 0.385 |
| contig059766-BurTARs.A029 | contig022320-TiITARs.A059 | 0.318 | 0.824 | 0.386 |
| contig086337-BriTARs.A019 | contig022320-TiITARs.A059 | 0.326 | 0.846 | 0.386 |
| contig061410-ZebTARs.A021 | contig030464-ZebTARs.A025 | 0.253 | 0.656 | 0.386 |
| contig022320-TiITARs.A059 | contig066056-ZebTARs.A017 | 0.310 | 0.802 | 0.386 |
| contig022383-TiITARs.A054 | contig061410-ZebTARs.A021 | 0.141 | 0.366 | 0.386 |
| contig054630-BurTARs.A023 | contig022390-TiITARs.A056 | 0.346 | 0.897 | 0.386 |
| contig061977-BurTARs.A012 | contig054630-BurTARs.A023 | 0.309 | 0.800 | 0.386 |

|                           |                           |       |       |       |
|---------------------------|---------------------------|-------|-------|-------|
| contig057148-BurTARs.A028 | contig022356-TiITARs.A040 | 0.130 | 0.337 | 0.386 |
| contig061433-BurTARs.A013 | contig022357-TiITARs.A041 | 0.166 | 0.431 | 0.386 |
| contig061977-BurTARs.A012 | contig022354-TiITARs.A038 | 0.234 | 0.605 | 0.386 |
| contig022353-TiITARs.A036 | contig066285-ZebTARs.A016 | 0.147 | 0.381 | 0.386 |
| contig022345-TiITARs.A034 | contig022383-TiITARs.A054 | 0.241 | 0.624 | 0.386 |
| contig086344-BriTARs.A020 | contig007524-TiITARs.A026 | 0.295 | 0.763 | 0.386 |
| contig055697-BurTARs.A022 | contig022353-TiITARs.A036 | 0.326 | 0.844 | 0.386 |
| contig022379-TiITARs.A052 | contig022383-TiITARs.A054 | 0.144 | 0.373 | 0.386 |
| contig022368-TiITARs.A047 | contig056134-TiITARs.A058 | 0.356 | 0.922 | 0.386 |
| contig057148-BurTARs.A028 | contig022365-TiITARs.A045 | 0.152 | 0.393 | 0.386 |
| contig061977-BurTARs.A012 | contig022356-TiITARs.A040 | 0.241 | 0.624 | 0.386 |
| contig025313-BriTAR.A002  | contig022324-TiITARs.A027 | 0.406 | 1.050 | 0.386 |
| contig061977-BurTARs.A012 | contig040586-ZebTAR.A002  | 0.400 | 1.036 | 0.386 |
| contig032272-NyeTAR.A004  | contig022377-TiITARs.A050 | 0.381 | 0.985 | 0.386 |
| contig060707-BurTARs.A015 | contig049540-BurTARs.A024 | 0.322 | 0.834 | 0.386 |
| contig061977-BurTARs.A012 | contig056134-TiITARs.A058 | 0.285 | 0.738 | 0.387 |
| contig022363-TiITARs.A044 | contig003909-ZebTAR.A003  | 0.386 | 0.998 | 0.387 |
| contig039642-TiITAR.A004  | contig066285-ZebTARs.A016 | 0.436 | 1.127 | 0.387 |
| contig086344-BriTARs.A020 | contig030445-ZebTARs.A026 | 0.314 | 0.812 | 0.387 |
| contig060707-BurTARs.A015 | contig022349-TiITARs.A035 | 0.352 | 0.911 | 0.387 |
| contig086337-BriTARs.A019 | contig061977-BurTARs.A012 | 0.263 | 0.681 | 0.387 |
| contig057301-BurTARs.A017 | contig059768-ZebTARs.A022 | 0.354 | 0.915 | 0.387 |
| contig029633-BriTAR.A003  | contig084887-BriTARs.A018 | 0.478 | 1.235 | 0.387 |
| contig022330-TiITARs.A028 | contig022390-TiITARs.A055 | 0.203 | 0.524 | 0.387 |
| contig022334-TiITARs.A029 | contig022390-TiITARs.A055 | 0.203 | 0.524 | 0.387 |
| contig056021-BurTARs.A020 | contig022390-TiITARs.A055 | 0.203 | 0.524 | 0.387 |
| contig086337-BriTARs.A019 | contig007520-TiITARs.A025 | 0.224 | 0.579 | 0.387 |
| contig061433-BurTARs.A013 | contig046010-NyeTARs.A019 | 0.162 | 0.418 | 0.387 |
| contig023443-TiITAR.A005  | contig022324-TiITARs.A027 | 0.400 | 1.033 | 0.387 |
| contig082565-BriTARs.A022 | contig060105-NyeTARs.A018 | 0.308 | 0.797 | 0.387 |
| contig086344-BriTARs.A020 | contig066285-ZebTARs.A016 | 0.328 | 0.847 | 0.387 |
| contig038663-NyeTAR.A005  | contig022330-TiITARs.A028 | 0.428 | 1.106 | 0.387 |
| contig055697-BurTARs.A022 | contig022320-TiITARs.A059 | 0.323 | 0.836 | 0.387 |
| contig086337-BriTARs.A019 | contig030464-ZebTARs.A025 | 0.344 | 0.889 | 0.387 |
| contig061433-BurTARs.A013 | contig066330-ZebTARs.A027 | 0.360 | 0.929 | 0.387 |
| contig035377-NyeTARs.A023 | contig039640-TiITAR.A002  | 0.401 | 1.036 | 0.387 |
| contig040586-ZebTAR.A002  | contig030471-ZebTARs.A024 | 0.445 | 1.149 | 0.387 |
| contig084887-BriTARs.A018 | contig046014-NyeTARs.A024 | 0.106 | 0.274 | 0.387 |
| contig059766-BurTARs.A029 | contig046013-NyeTARs.A021 | 0.339 | 0.875 | 0.387 |
| contig057148-BurTARs.A028 | contig030471-ZebTARs.A024 | 0.152 | 0.393 | 0.387 |
| contig022324-TiITARs.A027 | contig022354-TiITARs.A038 | 0.154 | 0.398 | 0.387 |
| contig035377-NyeTARs.A023 | contig066330-ZebTARs.A027 | 0.295 | 0.761 | 0.387 |
| contig022345-TiITARs.A034 | contig022379-TiITARs.A052 | 0.225 | 0.582 | 0.387 |
| contig029633-BriTAR.A003  | contig022375-TiITARs.A048 | 0.414 | 1.070 | 0.387 |
| contig022354-TiITARs.A038 | contig022356-TiITARs.A040 | 0.114 | 0.295 | 0.388 |
| contig086344-BriTARs.A020 | contig022324-TiITARs.A027 | 0.338 | 0.872 | 0.388 |
| contig084886-BriTARs.A017 | contig055697-BurTARs.A022 | 0.329 | 0.849 | 0.388 |
| contig084886-BriTARs.A017 | contig030471-ZebTARs.A024 | 0.149 | 0.384 | 0.388 |
| contig059766-BurTARs.A029 | contig061410-ZebTARs.A021 | 0.267 | 0.688 | 0.388 |
| contig056134-TiITARs.A058 | contig066285-ZebTARs.A016 | 0.348 | 0.896 | 0.388 |
| contig022357-TiITARs.A041 | contig059768-ZebTARs.A022 | 0.391 | 1.008 | 0.388 |
| contig056020-BurTARs.A021 | contig022334-TiITARs.A029 | 0.118 | 0.304 | 0.388 |
| contig022354-TiITARs.A038 | contig066285-ZebTARs.A016 | 0.152 | 0.391 | 0.388 |

|                           |                           |       |       |       |
|---------------------------|---------------------------|-------|-------|-------|
| contig061977-BurTARs.A012 | contig065494-BurTARs.A030 | 0.268 | 0.690 | 0.388 |
| contig056020-BurTARs.A021 | contig054630-BurTARs.A023 | 0.357 | 0.921 | 0.388 |
| contig039640-TiITAR.A002  | contig066691-ZebTARs.A015 | 0.430 | 1.109 | 0.388 |
| contig086337-BriTARs.A019 | contig022363-TiITARs.A044 | 0.304 | 0.782 | 0.388 |
| contig059673-BurTARs.A016 | contig039640-TiITAR.A002  | 0.462 | 1.191 | 0.388 |
| contig041024-BurTARs.A026 | contig022343-TiITARs.A033 | 0.124 | 0.319 | 0.388 |
| contig022334-TiITARs.A029 | contig040586-ZebTAR.A001  | 0.434 | 1.119 | 0.388 |
| contig022330-TiITARs.A028 | contig053139-ZebTARs.A023 | 0.317 | 0.815 | 0.388 |
| contig039642-TiITAR.A004  | contig030471-ZebTARs.A024 | 0.441 | 1.135 | 0.388 |
| contig049534-BurTARs.A025 | contig045088-TiITARs.A057 | 0.371 | 0.956 | 0.388 |
| contig045302-BurTAR.A001  | contig066691-ZebTARs.A015 | 0.434 | 1.118 | 0.388 |
| contig060707-BurTARs.A015 | contig057148-BurTARs.A028 | 0.341 | 0.877 | 0.388 |
| contig058002-NyeTARs.A025 | contig022343-TiITARs.A033 | 0.336 | 0.865 | 0.388 |
| contig060707-BurTARs.A015 | contig061410-ZebTARs.A021 | 0.308 | 0.794 | 0.389 |
| contig042499-NyeTARs.A028 | contig066330-ZebTARs.A027 | 0.285 | 0.732 | 0.389 |
| contig007512-TiITARs.A024 | contig022363-TiITARs.A044 | 0.326 | 0.838 | 0.389 |
| contig022349-TiITARs.A035 | contig053145-ZebTARs.A028 | 0.337 | 0.866 | 0.389 |
| contig049534-BurTARs.A025 | contig022343-TiITARs.A033 | 0.138 | 0.355 | 0.389 |
| contig022334-TiITARs.A029 | contig066691-ZebTARs.A015 | 0.110 | 0.283 | 0.389 |
| contig045088-TiITARs.A057 | contig056134-TiITARs.A058 | 0.301 | 0.773 | 0.389 |
| contig054630-BurTARs.A023 | contig022337-TiITARs.A031 | 0.382 | 0.983 | 0.389 |
| contig086337-BriTARs.A019 | contig022390-TiITARs.A056 | 0.287 | 0.737 | 0.389 |
| contig049534-BurTARs.A025 | contig039642-TiITAR.A004  | 0.436 | 1.121 | 0.389 |
| contig084876-BriTARs.A015 | contig055697-BurTARs.A022 | 0.281 | 0.722 | 0.389 |
| contig045088-TiITARs.A057 | contig059768-ZebTARs.A022 | 0.362 | 0.931 | 0.389 |
| contig086344-BriTARs.A020 | contig082565-BriTARs.A022 | 0.316 | 0.813 | 0.389 |
| contig049534-BurTARs.A025 | contig022337-TiITARs.A031 | 0.143 | 0.368 | 0.389 |
| contig007512-TiITARs.A024 | contig061417-ZebTARs.A020 | 0.326 | 0.838 | 0.389 |
| contig007512-TiITARs.A024 | contig022377-TiITARs.A050 | 0.347 | 0.892 | 0.389 |
| contig022324-TiITARs.A027 | contig040586-ZebTAR.A002  | 0.463 | 1.190 | 0.389 |
| contig049534-BurTARs.A025 | contig056134-TiITARs.A058 | 0.341 | 0.877 | 0.389 |
| contig029633-BriTAR.A003  | contig056134-TiITARs.A058 | 0.391 | 1.005 | 0.389 |
| contig038663-NyeTAR.A005  | contig058002-NyeTARs.A025 | 0.435 | 1.118 | 0.389 |
| contig086337-BriTARs.A019 | contig022334-TiITARs.A029 | 0.310 | 0.797 | 0.389 |
| contig029633-BriTAR.A003  | contig061977-BurTARs.A012 | 0.406 | 1.044 | 0.389 |
| contig055697-BurTARs.A022 | contig022334-TiITARs.A029 | 0.316 | 0.811 | 0.389 |
| contig022324-TiITARs.A027 | contig066330-ZebTARs.A027 | 0.349 | 0.898 | 0.389 |
| contig042499-NyeTARs.A028 | contig056134-TiITARs.A058 | 0.302 | 0.777 | 0.389 |
| contig034854-BurTARs.A027 | contig007512-TiITARs.A024 | 0.304 | 0.781 | 0.389 |
| contig022334-TiITARs.A029 | contig022334-TiITARs.A030 | 0.155 | 0.397 | 0.389 |
| contig060292-NyeTARs.A027 | contig066330-ZebTARs.A027 | 0.282 | 0.724 | 0.389 |
| contig057145-BurTARs.A018 | contig022368-TiITARs.A047 | 0.142 | 0.365 | 0.390 |
| contig056020-BurTARs.A021 | contig007520-TiITARs.A025 | 0.344 | 0.884 | 0.390 |
| contig039640-TiITAR.A003  | contig030440-ZebTARs.A029 | 0.377 | 0.968 | 0.390 |
| contig046010-NyeTARs.A019 | contig022355-TiITARs.A039 | 0.135 | 0.345 | 0.390 |
| contig045302-BurTAR.A001  | contig061977-BurTARs.A012 | 0.389 | 0.998 | 0.390 |
| contig039642-TiITAR.A004  | contig007520-TiITARs.A025 | 0.427 | 1.094 | 0.390 |
| contig039639-TiITAR.A001  | contig022383-TiITARs.A054 | 0.385 | 0.988 | 0.390 |
| contig086351-BriTARs.A021 | contig060707-BurTARs.A015 | 0.293 | 0.752 | 0.390 |
| contig022334-TiITARs.A029 | contig053145-ZebTARs.A028 | 0.326 | 0.837 | 0.390 |
| contig045302-BurTAR.A001  | contig022353-TiITARs.A036 | 0.450 | 1.155 | 0.390 |
| contig022368-TiITARs.A046 | contig056134-TiITARs.A058 | 0.344 | 0.881 | 0.390 |
| contig022379-TiITARs.A052 | contig061410-ZebTARs.A021 | 0.019 | 0.050 | 0.390 |



|                           |                           |       |       |       |
|---------------------------|---------------------------|-------|-------|-------|
| contig054630-BurTARs.A023 | contig066691-ZebTARs.A015 | 0.384 | 0.984 | 0.390 |
| contig061433-BurTARs.A013 | contig046014-NyeTARs.A024 | 0.146 | 0.375 | 0.390 |
| contig045302-BurTAR.A001  | contig022355-TiITARs.A039 | 0.440 | 1.128 | 0.390 |
| contig066890-ZebTARs.A014 | contig053145-ZebTARs.A028 | 0.279 | 0.715 | 0.390 |
| contig084876-BriTARs.A015 | contig039640-TiITAR.A003  | 0.397 | 1.019 | 0.390 |
| contig084886-BriTARs.A017 | contig054630-BurTARs.A023 | 0.383 | 0.982 | 0.390 |
| contig007520-TiITARs.A025 | contig022355-TiITARs.A039 | 0.342 | 0.877 | 0.390 |
| contig022390-TiITARs.A056 | contig059768-ZebTARs.A022 | 0.340 | 0.872 | 0.390 |
| contig039640-TiITAR.A002  | contig022324-TiITARs.A027 | 0.449 | 1.152 | 0.390 |
| contig086344-BriTARs.A020 | contig060292-NyeTARs.A027 | 0.295 | 0.755 | 0.390 |
| contig054630-BurTARs.A023 | contig045088-TiITARs.A057 | 0.363 | 0.931 | 0.390 |
| contig086337-BriTARs.A019 | contig040586-ZebTAR.A002  | 0.407 | 1.041 | 0.390 |
| contig058002-NyeTARs.A025 | contig007512-TiITARs.A024 | 0.249 | 0.639 | 0.390 |
| contig022345-TiITARs.A034 | contig022365-TiITARs.A045 | 0.130 | 0.333 | 0.390 |
| contig007512-TiITARs.A024 | contig030471-ZebTARs.A024 | 0.351 | 0.898 | 0.390 |
| contig057301-BurTARs.A017 | contig039639-TiITAR.A001  | 0.465 | 1.192 | 0.391 |
| contig007512-TiITARs.A024 | contig022345-TiITARs.A034 | 0.313 | 0.802 | 0.391 |
| contig061410-ZebTARs.A021 | contig059768-ZebTARs.A022 | 0.312 | 0.798 | 0.391 |
| contig046014-NyeTARs.A024 | contig022354-TiITARs.A037 | 0.153 | 0.392 | 0.391 |
| contig062039-NyeTARs.A022 | contig030464-ZebTARs.A025 | 0.251 | 0.642 | 0.391 |
| contig020038-BurTAR.A002  | contig022363-TiITARs.A044 | 0.389 | 0.995 | 0.391 |
| contig007524-TiITARs.A026 | contig022383-TiITARs.A054 | 0.318 | 0.814 | 0.391 |
| contig059673-BurTARs.A016 | contig007512-TiITARs.A024 | 0.269 | 0.688 | 0.391 |
| contig039642-TiITAR.A004  | contig022368-TiITARs.A047 | 0.436 | 1.116 | 0.391 |
| contig082565-BriTARs.A022 | contig056134-TiITARs.A058 | 0.280 | 0.717 | 0.391 |
| contig084868-BriTARs.A014 | contig007524-TiITARs.A026 | 0.328 | 0.840 | 0.391 |
| contig038663-NyeTAR.A005  | contig066691-ZebTARs.A015 | 0.448 | 1.146 | 0.391 |
| contig057148-BurTARs.A028 | contig035381-NyeTARs.A015 | 0.246 | 0.628 | 0.391 |
| contig084868-BriTARs.A014 | contig057148-BurTARs.A028 | 0.268 | 0.685 | 0.391 |
| contig022345-TiITARs.A034 | contig053139-ZebTARs.A023 | 0.310 | 0.793 | 0.391 |
| contig023443-TiITAR.A005  | contig022390-TiITARs.A055 | 0.369 | 0.943 | 0.391 |
| contig086337-BriTARs.A019 | contig022324-TiITARs.A027 | 0.326 | 0.834 | 0.391 |
| contig022341-TiITARs.A032 | contig040586-ZebTAR.A001  | 0.430 | 1.099 | 0.391 |
| contig022353-TiITARs.A036 | contig022355-TiITARs.A039 | 0.078 | 0.199 | 0.391 |
| contig032272-NyeTAR.A004  | contig022363-TiITARs.A044 | 0.386 | 0.985 | 0.391 |
| contig046013-NyeTARs.A021 | contig040586-ZebTAR.A001  | 0.444 | 1.135 | 0.391 |
| contig084868-BriTARs.A014 | contig059673-BurTARs.A016 | 0.328 | 0.838 | 0.391 |
| contig066285-ZebTARs.A016 | contig030464-ZebTARs.A025 | 0.172 | 0.440 | 0.391 |
| contig057145-BurTARs.A018 | contig022343-TiITARs.A033 | 0.129 | 0.329 | 0.391 |
| contig057148-BurTARs.A028 | contig060105-NyeTARs.A018 | 0.341 | 0.870 | 0.391 |
| contig084868-BriTARs.A014 | contig039640-TiITAR.A003  | 0.384 | 0.981 | 0.391 |
| contig057148-BurTARs.A028 | contig022368-TiITARs.A047 | 0.150 | 0.383 | 0.391 |
| contig045999-NyeTARs.A026 | contig022334-TiITARs.A030 | 0.208 | 0.532 | 0.391 |
| contig039642-TiITAR.A004  | contig030445-ZebTARs.A026 | 0.367 | 0.938 | 0.391 |
| contig061433-BurTARs.A013 | contig030464-ZebTARs.A025 | 0.163 | 0.417 | 0.391 |
| contig022356-TiITARs.A040 | contig022377-TiITARs.A050 | 0.137 | 0.350 | 0.392 |
| contig029633-BriTAR.A003  | contig007520-TiITARs.A025 | 0.450 | 1.150 | 0.392 |
| contig061091-BurTARs.A014 | contig054630-BurTARs.A023 | 0.379 | 0.969 | 0.392 |
| contig084887-BriTARs.A018 | contig022377-TiITARs.A050 | 0.138 | 0.353 | 0.392 |
| contig061433-BurTARs.A013 | contig066691-ZebTARs.A015 | 0.162 | 0.414 | 0.392 |
| contig022345-TiITARs.A034 | contig022363-TiITARs.A044 | 0.155 | 0.395 | 0.392 |
| contig061091-BurTARs.A014 | contig066285-ZebTARs.A016 | 0.150 | 0.383 | 0.392 |
| contig045302-BurTAR.A001  | contig058002-NyeTARs.A025 | 0.429 | 1.094 | 0.392 |

|                           |                           |       |       |       |
|---------------------------|---------------------------|-------|-------|-------|
| contig045302-BurTAR.A001  | contig022377-TiITARs.A050 | 0.426 | 1.087 | 0.392 |
| contig007512-TiITARs.A024 | contig022320-TiITARs.A059 | 0.327 | 0.833 | 0.392 |
| contig039640-TiITAR.A003  | contig061410-ZebTARs.A021 | 0.384 | 0.979 | 0.392 |
| contig020038-BurTAR.A002  | contig022324-TiITARs.A027 | 0.413 | 1.054 | 0.392 |
| contig041024-BurTARs.A026 | contig007518-TiITARs.A019 | 0.341 | 0.871 | 0.392 |
| contig059766-BurTARs.A029 | contig066890-ZebTARs.A014 | 0.281 | 0.716 | 0.392 |
| contig029633-BriTAR.A003  | contig042499-NyeTARs.A028 | 0.462 | 1.178 | 0.392 |
| contig029633-BriTAR.A003  | contig022353-TiITARs.A036 | 0.467 | 1.191 | 0.392 |
| contig038663-NyeTAR.A005  | contig022353-TiITARs.A036 | 0.465 | 1.185 | 0.392 |
| contig084880-BriTARs.A016 | contig022390-TiITARs.A055 | 0.315 | 0.803 | 0.392 |
| contig065494-BurTARs.A030 | contig022345-TiITARs.A034 | 0.327 | 0.833 | 0.392 |
| contig007518-TiITARs.A019 | contig062676-ZebTARs.A019 | 0.357 | 0.911 | 0.392 |
| contig022345-TiITARs.A034 | contig040586-ZebTAR.A001  | 0.406 | 1.034 | 0.392 |
| contig058002-NyeTARs.A025 | contig022355-TiITARs.A039 | 0.340 | 0.868 | 0.392 |
| contig046014-NyeTARs.A024 | contig007518-TiITARs.A019 | 0.348 | 0.887 | 0.392 |
| contig061977-BurTARs.A012 | contig059673-BurTARs.A016 | 0.317 | 0.809 | 0.392 |
| contig084876-BriTARs.A015 | contig060707-BurTARs.A015 | 0.320 | 0.815 | 0.392 |
| contig084886-BriTARs.A017 | contig056134-TiITARs.A058 | 0.342 | 0.871 | 0.392 |
| contig084887-BriTARs.A018 | contig056134-TiITARs.A058 | 0.343 | 0.874 | 0.392 |
| contig046014-NyeTARs.A024 | contig066056-ZebTARs.A017 | 0.305 | 0.778 | 0.392 |
| contig045302-BurTAR.A001  | contig022343-TiITARs.A033 | 0.429 | 1.093 | 0.392 |
| contig057145-BurTARs.A018 | contig035381-NyeTARs.A015 | 0.234 | 0.596 | 0.392 |
| contig061977-BurTARs.A012 | contig022365-TiITARs.A045 | 0.249 | 0.636 | 0.392 |
| contig061433-BurTARs.A013 | contig055697-BurTARs.A022 | 0.341 | 0.868 | 0.393 |
| contig057148-BurTARs.A028 | contig062039-NyeTARs.A022 | 0.254 | 0.648 | 0.393 |
| contig022390-TiITARs.A056 | contig066330-ZebTARs.A027 | 0.294 | 0.748 | 0.393 |
| contig086344-BriTARs.A020 | contig049534-BurTARs.A025 | 0.329 | 0.838 | 0.393 |
| contig022377-TiITARs.A050 | contig003909-ZebTAR.A003  | 0.381 | 0.970 | 0.393 |
| contig022363-TiITARs.A044 | contig053139-ZebTARs.A023 | 0.318 | 0.808 | 0.393 |
| contig049534-BurTARs.A025 | contig030464-ZebTARs.A025 | 0.168 | 0.427 | 0.393 |
| contig059766-BurTARs.A029 | contig022349-TiITARs.A035 | 0.341 | 0.868 | 0.393 |
| contig084876-BriTARs.A015 | contig086344-BriTARs.A020 | 0.322 | 0.821 | 0.393 |
| contig022355-TiITARs.A039 | contig030464-ZebTARs.A025 | 0.137 | 0.348 | 0.393 |
| contig046011-NyeTARs.A016 | contig040586-ZebTAR.A002  | 0.508 | 1.292 | 0.393 |
| contig060707-BurTARs.A015 | contig022382-TiITARs.A053 | 0.322 | 0.820 | 0.393 |
| contig061091-BurTARs.A014 | contig022334-TiITARs.A029 | 0.107 | 0.271 | 0.393 |
| contig060707-BurTARs.A015 | contig030464-ZebTARs.A025 | 0.339 | 0.863 | 0.393 |
| contig046007-NyeTARs.A017 | contig007520-TiITARs.A025 | 0.348 | 0.885 | 0.393 |
| contig039639-TiITAR.A001  | contig022390-TiITARs.A056 | 0.405 | 1.030 | 0.393 |
| contig060707-BurTARs.A015 | contig066285-ZebTARs.A016 | 0.328 | 0.835 | 0.393 |
| contig065494-BurTARs.A030 | contig022363-TiITARs.A044 | 0.321 | 0.816 | 0.393 |
| contig038663-NyeTAR.A005  | contig046014-NyeTARs.A024 | 0.437 | 1.111 | 0.393 |
| contig057301-BurTARs.A017 | contig039640-TiITAR.A002  | 0.466 | 1.186 | 0.393 |
| contig022330-TiITARs.A028 | contig022320-TiITARs.A059 | 0.109 | 0.278 | 0.393 |
| contig046013-NyeTARs.A021 | contig053145-ZebTARs.A028 | 0.342 | 0.869 | 0.393 |
| contig061433-BurTARs.A013 | contig046007-NyeTARs.A017 | 0.172 | 0.437 | 0.393 |
| contig025313-BriTAR.A002  | contig022377-TiITARs.A050 | 0.374 | 0.952 | 0.393 |
| contig035376-NyeTARs.A014 | contig039642-TiITAR.A004  | 0.383 | 0.973 | 0.393 |
| contig061977-BurTARs.A012 | contig039642-TiITAR.A004  | 0.390 | 0.991 | 0.393 |
| contig060105-NyeTARs.A018 | contig056200-NyeTARs.A029 | 0.324 | 0.824 | 0.393 |
| contig039642-TiITAR.A004  | contig061417-ZebTARs.A020 | 0.417 | 1.060 | 0.393 |
| contig022354-TiITARs.A037 | contig022368-TiITARs.A046 | 0.161 | 0.410 | 0.393 |
| contig065494-BurTARs.A030 | contig066890-ZebTARs.A014 | 0.284 | 0.721 | 0.394 |

|                           |                           |       |       |       |
|---------------------------|---------------------------|-------|-------|-------|
| contig045302-BurTAR.A001  | contig046007-NyeTARs.A017 | 0.450 | 1.143 | 0.394 |
| contig060105-NyeTARs.A018 | contig060292-NyeTARs.A027 | 0.287 | 0.730 | 0.394 |
| contig084876-BriTARs.A015 | contig053139-ZebTARs.A023 | 0.276 | 0.700 | 0.394 |
| contig046010-NyeTARs.A019 | contig056134-TiITARs.A058 | 0.343 | 0.871 | 0.394 |
| contig049540-BurTARs.A024 | contig062039-NyeTARs.A022 | 0.253 | 0.643 | 0.394 |
| contig066691-ZebTARs.A015 | contig066285-ZebTARs.A016 | 0.153 | 0.390 | 0.394 |
| contig086344-BriTARs.A020 | contig062676-ZebTARs.A019 | 0.314 | 0.798 | 0.394 |
| contig084876-BriTARs.A015 | contig022345-TiITARs.A034 | 0.240 | 0.609 | 0.394 |
| contig022337-TiITARs.A031 | contig059768-ZebTARs.A022 | 0.376 | 0.954 | 0.394 |
| contig022379-TiITARs.A052 | contig040586-ZebTAR.A001  | 0.417 | 1.059 | 0.394 |
| contig022365-TiITARs.A045 | contig022377-TiITARs.A050 | 0.133 | 0.339 | 0.394 |
| contig046010-NyeTARs.A019 | contig062039-NyeTARs.A022 | 0.259 | 0.657 | 0.394 |
| contig059673-BurTARs.A016 | contig053139-ZebTARs.A023 | 0.259 | 0.658 | 0.394 |
| contig082565-BriTARs.A022 | contig039640-TiITAR.A003  | 0.373 | 0.946 | 0.394 |
| contig056021-BurTARs.A020 | contig039642-TiITAR.A004  | 0.417 | 1.060 | 0.394 |
| contig086344-BriTARs.A020 | contig035381-NyeTARs.A015 | 0.316 | 0.802 | 0.394 |
| contig035375-NyeTARs.A013 | contig039640-TiITAR.A003  | 0.376 | 0.953 | 0.394 |
| contig041024-BurTARs.A026 | contig022362-TiITARs.A042 | 0.126 | 0.320 | 0.394 |
| contig039642-TiITAR.A004  | contig066691-ZebTARs.A015 | 0.443 | 1.124 | 0.394 |
| contig022345-TiITARs.A034 | contig066330-ZebTARs.A027 | 0.331 | 0.840 | 0.394 |
| contig060707-BurTARs.A015 | contig035377-NyeTARs.A023 | 0.327 | 0.829 | 0.394 |
| contig045302-BurTAR.A001  | contig022379-TiITARs.A052 | 0.410 | 1.040 | 0.394 |
| contig086344-BriTARs.A020 | contig035376-NyeTARs.A014 | 0.324 | 0.821 | 0.394 |
| contig084880-BriTARs.A016 | contig038663-NyeTAR.A005  | 0.452 | 1.148 | 0.394 |
| contig045302-BurTAR.A001  | contig056020-BurTARs.A021 | 0.482 | 1.222 | 0.394 |
| contig059766-BurTARs.A029 | contig022334-TiITARs.A029 | 0.330 | 0.838 | 0.394 |
| contig065494-BurTARs.A030 | contig022330-TiITARs.A028 | 0.336 | 0.853 | 0.394 |
| contig061977-BurTARs.A012 | contig066330-ZebTARs.A027 | 0.270 | 0.684 | 0.394 |
| contig038663-NyeTAR.A005  | contig022355-TiITARs.A039 | 0.453 | 1.148 | 0.394 |
| contig057301-BurTARs.A017 | contig040586-ZebTAR.A002  | 0.471 | 1.194 | 0.394 |
| contig038663-NyeTAR.A005  | contig022320-TiITARs.A059 | 0.441 | 1.119 | 0.394 |
| contig046007-NyeTARs.A017 | contig030471-ZebTARs.A024 | 0.108 | 0.275 | 0.394 |
| contig022324-TiITARs.A027 | contig066691-ZebTARs.A015 | 0.162 | 0.410 | 0.394 |
| contig030445-ZebTARs.A026 | contig053145-ZebTARs.A028 | 0.248 | 0.630 | 0.394 |
| contig040586-ZebTAR.A002  | contig061417-ZebTARs.A020 | 0.427 | 1.082 | 0.394 |
| contig060707-BurTARs.A015 | contig022368-TiITARs.A047 | 0.330 | 0.836 | 0.394 |
| contig045088-TiITARs.A057 | contig053145-ZebTARs.A028 | 0.280 | 0.709 | 0.394 |
| contig065494-BurTARs.A030 | contig061410-ZebTARs.A021 | 0.270 | 0.683 | 0.395 |
| contig055697-BurTARs.A022 | contig022334-TiITARs.A030 | 0.344 | 0.871 | 0.395 |
| contig061433-BurTARs.A013 | contig022345-TiITARs.A034 | 0.170 | 0.430 | 0.395 |
| contig056020-BurTARs.A021 | contig022330-TiITARs.A028 | 0.120 | 0.303 | 0.395 |
| contig022354-TiITARs.A038 | contig022383-TiITARs.A054 | 0.241 | 0.611 | 0.395 |
| contig046007-NyeTARs.A017 | contig030464-ZebTARs.A025 | 0.139 | 0.352 | 0.395 |
| contig045999-NyeTARs.A026 | contig039640-TiITAR.A003  | 0.440 | 1.116 | 0.395 |
| contig086344-BriTARs.A020 | contig035377-NyeTARs.A023 | 0.330 | 0.835 | 0.395 |
| contig022345-TiITARs.A034 | contig062676-ZebTARs.A019 | 0.236 | 0.599 | 0.395 |
| contig054630-BurTARs.A023 | contig046007-NyeTARs.A017 | 0.361 | 0.915 | 0.395 |
| contig035376-NyeTARs.A014 | contig062039-NyeTARs.A022 | 0.215 | 0.545 | 0.395 |
| contig061977-BurTARs.A012 | contig040586-ZebTAR.A001  | 0.394 | 0.998 | 0.395 |
| contig084868-BriTARs.A014 | contig022383-TiITARs.A054 | 0.036 | 0.092 | 0.395 |
| contig061417-ZebTARs.A020 | contig053139-ZebTARs.A023 | 0.323 | 0.817 | 0.395 |
| contig022377-TiITARs.A050 | contig040586-ZebTAR.A001  | 0.432 | 1.095 | 0.395 |
| contig022341-TiITARs.A032 | contig022368-TiITARs.A047 | 0.148 | 0.375 | 0.395 |

|                           |                           |       |       |       |
|---------------------------|---------------------------|-------|-------|-------|
| contig058002-NyeTARs.A025 | contig022362-TiITARs.A042 | 0.337 | 0.854 | 0.395 |
| contig007512-TiITARs.A024 | contig022362-TiITARs.A042 | 0.317 | 0.804 | 0.395 |
| contig086337-BriTARs.A019 | contig061410-ZebTARs.A021 | 0.264 | 0.669 | 0.395 |
| contig059766-BurTARs.A029 | contig045088-TiITARs.A057 | 0.276 | 0.700 | 0.395 |
| contig084886-BriTARs.A017 | contig049534-BurTARs.A025 | 0.164 | 0.415 | 0.395 |
| contig007512-TiITARs.A024 | contig022382-TiITARs.A053 | 0.308 | 0.779 | 0.395 |
| contig039642-TiITAR.A004  | contig007524-TiITARs.A026 | 0.433 | 1.097 | 0.395 |
| contig086337-BriTARs.A019 | contig022377-TiITARs.A050 | 0.338 | 0.855 | 0.395 |
| contig086337-BriTARs.A019 | contig061417-ZebTARs.A020 | 0.318 | 0.806 | 0.395 |
| contig035377-NyeTARs.A023 | contig007518-TiITARs.A019 | 0.340 | 0.860 | 0.395 |
| contig056021-BurTARs.A020 | contig040586-ZebTAR.A002  | 0.427 | 1.082 | 0.395 |
| contig029633-BriTAR.A003  | contig022343-TiITARs.A033 | 0.441 | 1.117 | 0.395 |
| contig066691-ZebTARs.A015 | contig059768-ZebTARs.A022 | 0.377 | 0.955 | 0.395 |
| contig084886-BriTARs.A017 | contig059768-ZebTARs.A022 | 0.376 | 0.953 | 0.395 |
| contig065494-BurTARs.A030 | contig045088-TiITARs.A057 | 0.280 | 0.710 | 0.395 |
| contig060707-BurTARs.A015 | contig046010-NyeTARs.A019 | 0.341 | 0.863 | 0.395 |
| contig038663-NyeTAR.A005  | contig046010-NyeTARs.A019 | 0.468 | 1.184 | 0.395 |
| contig020038-BurTAR.A002  | contig022377-TiITARs.A050 | 0.385 | 0.974 | 0.395 |
| contig046011-NyeTARs.A016 | contig053139-ZebTARs.A023 | 0.386 | 0.976 | 0.395 |
| contig060707-BurTARs.A015 | contig022320-TiITARs.A059 | 0.317 | 0.802 | 0.395 |
| contig061977-BurTARs.A012 | contig060105-NyeTARs.A018 | 0.309 | 0.781 | 0.395 |
| contig061433-BurTARs.A013 | contig040586-ZebTAR.A002  | 0.453 | 1.146 | 0.395 |
| contig039642-TiITAR.A004  | contig022324-TiITARs.A027 | 0.457 | 1.155 | 0.395 |
| contig007520-TiITARs.A025 | contig061410-ZebTARs.A021 | 0.299 | 0.757 | 0.395 |
| contig039642-TiITAR.A004  | contig030440-ZebTARs.A029 | 0.378 | 0.955 | 0.395 |
| contig086337-BriTARs.A019 | contig022334-TiITARs.A030 | 0.342 | 0.866 | 0.395 |
| contig045302-BurTAR.A001  | contig039640-TiITAR.A003  | 0.048 | 0.122 | 0.395 |
| contig059673-BurTARs.A016 | contig022383-TiITARs.A054 | 0.325 | 0.822 | 0.395 |
| contig054630-BurTARs.A023 | contig022382-TiITARs.A053 | 0.352 | 0.890 | 0.395 |
| contig061433-BurTARs.A013 | contig049534-BurTARs.A025 | 0.169 | 0.426 | 0.395 |
| contig084886-BriTARs.A017 | contig022345-TiITARs.A034 | 0.135 | 0.342 | 0.395 |
| contig022363-TiITARs.A044 | contig066330-ZebTARs.A027 | 0.327 | 0.826 | 0.396 |
| contig061433-BurTARs.A013 | contig066056-ZebTARs.A017 | 0.334 | 0.844 | 0.396 |
| contig022354-TiITARs.A038 | contig022368-TiITARs.A047 | 0.136 | 0.344 | 0.396 |
| contig022341-TiITARs.A032 | contig022379-TiITARs.A052 | 0.233 | 0.590 | 0.396 |
| contig046010-NyeTARs.A019 | contig007518-TiITARs.A019 | 0.363 | 0.919 | 0.396 |
| contig060105-NyeTARs.A018 | contig022349-TiITARs.A035 | 0.356 | 0.901 | 0.396 |
| contig022354-TiITARs.A037 | contig022355-TiITARs.A039 | 0.167 | 0.423 | 0.396 |
| contig061091-BurTARs.A014 | contig049534-BurTARs.A025 | 0.143 | 0.363 | 0.396 |
| contig060105-NyeTARs.A018 | contig058002-NyeTARs.A025 | 0.299 | 0.757 | 0.396 |
| contig022354-TiITARs.A037 | contig022363-TiITARs.A043 | 0.151 | 0.381 | 0.396 |
| contig053139-ZebTARs.A023 | contig030464-ZebTARs.A025 | 0.346 | 0.874 | 0.396 |
| contig062039-NyeTARs.A022 | contig030445-ZebTARs.A026 | 0.202 | 0.511 | 0.396 |
| contig046011-NyeTARs.A016 | contig007512-TiITARs.A024 | 0.383 | 0.967 | 0.396 |
| contig062676-ZebTARs.A019 | contig061410-ZebTARs.A021 | 0.136 | 0.343 | 0.396 |
| contig086337-BriTARs.A019 | contig061433-BurTARs.A013 | 0.335 | 0.847 | 0.396 |
| contig039640-TiITAR.A003  | contig022383-TiITARs.A054 | 0.385 | 0.972 | 0.396 |
| contig022334-TiITARs.A030 | contig030440-ZebTARs.A029 | 0.237 | 0.598 | 0.396 |
| contig056021-BurTARs.A020 | contig041024-BurTARs.A026 | 0.106 | 0.267 | 0.396 |
| contig022354-TiITARs.A038 | contig059768-ZebTARs.A022 | 0.362 | 0.915 | 0.396 |
| contig049540-BurTARs.A024 | contig056134-TiITARs.A058 | 0.359 | 0.908 | 0.396 |
| contig038663-NyeTAR.A005  | contig046007-NyeTARs.A017 | 0.464 | 1.172 | 0.396 |
| contig061433-BurTARs.A013 | contig053139-ZebTARs.A023 | 0.330 | 0.834 | 0.396 |

|                           |                           |       |       |       |
|---------------------------|---------------------------|-------|-------|-------|
| contig057301-BurTARs.A017 | contig057148-BurTARs.A028 | 0.382 | 0.963 | 0.396 |
| contig022379-TiITARs.A052 | contig062676-ZebTARs.A019 | 0.139 | 0.350 | 0.396 |
| contig038663-NyeTAR.A005  | contig022341-TiITARs.A032 | 0.437 | 1.103 | 0.396 |
| contig049534-BurTARs.A025 | contig059768-ZebTARs.A022 | 0.384 | 0.969 | 0.396 |
| contig022324-TiITARs.A027 | contig022334-TiITARs.A029 | 0.152 | 0.383 | 0.396 |
| contig022334-TiITARs.A029 | contig066056-ZebTARs.A017 | 0.326 | 0.822 | 0.396 |
| contig060105-NyeTARs.A018 | contig022383-TiITARs.A054 | 0.303 | 0.764 | 0.396 |
| contig022379-TiITARs.A052 | contig053139-ZebTARs.A023 | 0.270 | 0.682 | 0.396 |
| contig022349-TiITARs.A035 | contig030464-ZebTARs.A025 | 0.153 | 0.385 | 0.396 |
| contig049534-BurTARs.A025 | contig035381-NyeTARs.A015 | 0.265 | 0.667 | 0.396 |
| contig061091-BurTARs.A014 | contig059768-ZebTARs.A022 | 0.373 | 0.940 | 0.397 |
| contig057148-BurTARs.A028 | contig066330-ZebTARs.A027 | 0.347 | 0.876 | 0.397 |
| contig086337-BriTARs.A019 | contig007524-TiITARs.A026 | 0.231 | 0.582 | 0.397 |
| contig040586-ZebTAR.A002  | contig062676-ZebTARs.A019 | 0.399 | 1.006 | 0.397 |
| contig056021-BurTARs.A020 | contig007512-TiITARs.A024 | 0.332 | 0.837 | 0.397 |
| contig056134-TiITARs.A058 | contig040586-ZebTAR.A002  | 0.380 | 0.959 | 0.397 |
| contig022345-TiITARs.A034 | contig030445-ZebTARs.A026 | 0.238 | 0.600 | 0.397 |
| contig022320-TiITARs.A059 | contig053139-ZebTARs.A023 | 0.329 | 0.829 | 0.397 |
| contig022365-TiITARs.A045 | contig066285-ZebTARs.A016 | 0.153 | 0.385 | 0.397 |
| contig059766-BurTARs.A029 | contig030445-ZebTARs.A026 | 0.250 | 0.630 | 0.397 |
| contig022341-TiITARs.A032 | contig022354-TiITARs.A037 | 0.169 | 0.426 | 0.397 |
| contig022330-TiITARs.A028 | contig066056-ZebTARs.A017 | 0.323 | 0.813 | 0.397 |
| contig084886-BriTARs.A017 | contig060707-BurTARs.A015 | 0.327 | 0.823 | 0.397 |
| contig022375-TiITARs.A048 | contig066056-ZebTARs.A017 | 0.323 | 0.815 | 0.397 |
| contig055697-BurTARs.A022 | contig022377-TiITARs.A050 | 0.346 | 0.870 | 0.397 |
| contig057148-BurTARs.A028 | contig022368-TiITARs.A046 | 0.149 | 0.375 | 0.397 |
| contig084887-BriTARs.A018 | contig061433-BurTARs.A013 | 0.163 | 0.409 | 0.397 |
| contig022362-TiITARs.A042 | contig059768-ZebTARs.A022 | 0.344 | 0.867 | 0.397 |
| contig084876-BriTARs.A015 | contig022341-TiITARs.A032 | 0.240 | 0.603 | 0.397 |
| contig022324-TiITARs.A027 | contig022365-TiITARs.A045 | 0.162 | 0.408 | 0.397 |
| contig022377-TiITARs.A050 | contig053145-ZebTARs.A028 | 0.335 | 0.844 | 0.397 |
| contig065494-BurTARs.A030 | contig022320-TiITARs.A059 | 0.325 | 0.819 | 0.397 |
| contig022353-TiITARs.A036 | contig056134-TiITARs.A058 | 0.335 | 0.843 | 0.397 |
| contig061433-BurTARs.A013 | contig022349-TiITARs.A035 | 0.174 | 0.437 | 0.397 |
| contig065494-BurTARs.A030 | contig022377-TiITARs.A050 | 0.338 | 0.852 | 0.397 |
| contig054630-BurTARs.A023 | contig061410-ZebTARs.A021 | 0.318 | 0.799 | 0.397 |
| contig029633-BriTAR.A003  | contig022330-TiITARs.A028 | 0.434 | 1.091 | 0.397 |
| contig054630-BurTARs.A023 | contig022324-TiITARs.A027 | 0.416 | 1.047 | 0.397 |
| contig056023-BurTARs.A019 | contig022334-TiITARs.A030 | 0.208 | 0.524 | 0.397 |
| contig056134-TiITARs.A058 | contig030440-ZebTARs.A029 | 0.291 | 0.732 | 0.397 |
| contig022354-TiITARs.A038 | contig022377-TiITARs.A050 | 0.133 | 0.336 | 0.397 |
| contig084887-BriTARs.A018 | contig022353-TiITARs.A036 | 0.031 | 0.078 | 0.397 |
| contig065494-BurTARs.A030 | contig046013-NyeTARs.A021 | 0.343 | 0.864 | 0.398 |
| contig035381-NyeTARs.A015 | contig060105-NyeTARs.A018 | 0.313 | 0.786 | 0.398 |
| contig054630-BurTARs.A023 | contig022354-TiITARs.A038 | 0.375 | 0.942 | 0.398 |
| contig046007-NyeTARs.A017 | contig056134-TiITARs.A058 | 0.347 | 0.871 | 0.398 |
| contig022363-TiITARs.A044 | contig040586-ZebTAR.A001  | 0.416 | 1.045 | 0.398 |
| contig084886-BriTARs.A017 | contig053139-ZebTARs.A023 | 0.333 | 0.837 | 0.398 |
| contig022334-TiITARs.A029 | contig022320-TiITARs.A059 | 0.111 | 0.279 | 0.398 |
| contig061977-BurTARs.A012 | contig041024-BurTARs.A026 | 0.236 | 0.592 | 0.398 |
| contig049534-BurTARs.A025 | contig066691-ZebTARs.A015 | 0.147 | 0.369 | 0.398 |
| contig029633-BriTAR.A003  | contig046013-NyeTARs.A021 | 0.448 | 1.127 | 0.398 |
| contig057148-BurTARs.A028 | contig053145-ZebTARs.A028 | 0.348 | 0.874 | 0.398 |

|                           |                           |       |       |       |
|---------------------------|---------------------------|-------|-------|-------|
| contig035377-NyeTARs.A023 | contig058002-NyeTARs.A025 | 0.321 | 0.807 | 0.398 |
| contig045302-BurTAR.A001  | contig062676-ZebTARs.A019 | 0.411 | 1.033 | 0.398 |
| contig035376-NyeTARs.A014 | contig060105-NyeTARs.A018 | 0.320 | 0.805 | 0.398 |
| contig054630-BurTARs.A023 | contig007518-TiTARs.A019  | 0.381 | 0.957 | 0.398 |
| contig056134-TiTARs.A058  | contig061410-ZebTARs.A021 | 0.288 | 0.725 | 0.398 |
| contig040586-ZebTAR.A001  | contig062676-ZebTARs.A019 | 0.406 | 1.020 | 0.398 |
| contig022353-TiTARs.A036  | contig022320-TiTARs.A059  | 0.103 | 0.258 | 0.398 |
| contig020038-BurTAR.A002  | contig023443-TiTAR.A005   | 0.020 | 0.050 | 0.398 |
| contig040586-ZebTAR.A001  | contig066285-ZebTARs.A016 | 0.449 | 1.128 | 0.398 |
| contig022377-TiTARs.A050  | contig030464-ZebTARs.A025 | 0.153 | 0.385 | 0.398 |
| contig022368-TiTARs.A047  | contig040586-ZebTAR.A001  | 0.432 | 1.085 | 0.398 |
| contig029633-BriTAR.A003  | contig022349-TiTARs.A035  | 0.468 | 1.176 | 0.398 |
| contig084876-BriTARs.A015 | contig057148-BurTARs.A028 | 0.258 | 0.647 | 0.398 |
| contig056023-BurTARs.A019 | contig040586-ZebTAR.A001  | 0.441 | 1.107 | 0.398 |
| contig022390-TiTARs.A055  | contig066056-ZebTARs.A017 | 0.400 | 1.003 | 0.398 |
| contig066890-ZebTARs.A014 | contig066330-ZebTARs.A027 | 0.286 | 0.717 | 0.398 |
| contig029633-BriTAR.A003  | contig022320-TiTARs.A059  | 0.439 | 1.102 | 0.398 |
| contig055697-BurTARs.A022 | contig035375-NyeTARs.A013 | 0.280 | 0.702 | 0.399 |
| contig060707-BurTARs.A015 | contig059673-BurTARs.A016 | 0.305 | 0.765 | 0.399 |
| contig022334-TiTARs.A029  | contig053139-ZebTARs.A023 | 0.320 | 0.802 | 0.399 |
| contig058002-NyeTARs.A025 | contig022368-TiTARs.A046  | 0.343 | 0.860 | 0.399 |
| contig061091-BurTARs.A014 | contig022377-TiTARs.A050  | 0.140 | 0.352 | 0.399 |
| contig082565-BriTARs.A022 | contig039642-TiTAR.A004   | 0.373 | 0.935 | 0.399 |
| contig039642-TiTAR.A004   | contig045088-TiTARs.A057  | 0.457 | 1.146 | 0.399 |
| contig045302-BurTAR.A001  | contig061410-ZebTARs.A021 | 0.395 | 0.990 | 0.399 |
| contig035376-NyeTARs.A014 | contig056134-TiTARs.A058  | 0.288 | 0.722 | 0.399 |
| contig057305-BurTARs.A031 | contig062039-NyeTARs.A022 | 0.360 | 0.902 | 0.399 |
| contig007520-TiTARs.A025  | contig022390-TiTARs.A055  | 0.287 | 0.720 | 0.399 |
| contig084876-BriTARs.A015 | contig022383-TiTARs.A054  | 0.148 | 0.371 | 0.399 |
| contig055697-BurTARs.A022 | contig046011-NyeTARs.A016 | 0.391 | 0.981 | 0.399 |
| contig060707-BurTARs.A015 | contig022324-TiTARs.A027  | 0.335 | 0.841 | 0.399 |
| contig057305-BurTARs.A031 | contig058002-NyeTARs.A025 | 0.253 | 0.635 | 0.399 |
| contig060707-BurTARs.A015 | contig049534-BurTARs.A025 | 0.330 | 0.826 | 0.399 |
| contig049540-BurTARs.A024 | contig060105-NyeTARs.A018 | 0.324 | 0.813 | 0.399 |
| contig046010-NyeTARs.A019 | contig022356-TiTARs.A040  | 0.129 | 0.324 | 0.399 |
| contig029633-BriTAR.A003  | contig022390-TiTARs.A055  | 0.462 | 1.158 | 0.399 |
| contig060105-NyeTARs.A018 | contig066285-ZebTARs.A016 | 0.330 | 0.827 | 0.399 |
| contig022330-TiTARs.A028  | contig066330-ZebTARs.A027 | 0.338 | 0.848 | 0.399 |
| contig060105-NyeTARs.A018 | contig007524-TiTARs.A026  | 0.293 | 0.733 | 0.399 |
| contig084868-BriTARs.A014 | contig022363-TiTARs.A043  | 0.307 | 0.769 | 0.399 |
| contig045302-BurTAR.A001  | contig066285-ZebTARs.A016 | 0.445 | 1.116 | 0.399 |
| contig022383-TiTARs.A054  | contig062677-ZebTARs.A018 | 0.163 | 0.409 | 0.399 |
| contig038663-NyeTAR.A005  | contig022334-TiTARs.A029  | 0.441 | 1.106 | 0.399 |
| contig040586-ZebTAR.A002  | contig061410-ZebTARs.A021 | 0.407 | 1.020 | 0.399 |
| contig042499-NyeTARs.A028 | contig039640-TiTAR.A003   | 0.462 | 1.157 | 0.399 |
| contig029633-BriTAR.A003  | contig061091-BurTARs.A014 | 0.449 | 1.125 | 0.399 |
| contig046007-NyeTARs.A017 | contig046010-NyeTARs.A019 | 0.141 | 0.353 | 0.399 |
| contig061433-BurTARs.A013 | contig022362-TiTARs.A042  | 0.170 | 0.426 | 0.399 |
| contig038663-NyeTAR.A005  | contig022345-TiTARs.A034  | 0.411 | 1.030 | 0.399 |
| contig057148-BurTARs.A028 | contig065494-BurTARs.A030 | 0.350 | 0.876 | 0.399 |
| contig039642-TiTAR.A004   | contig062676-ZebTARs.A019 | 0.391 | 0.978 | 0.399 |
| contig022356-TiTARs.A040  | contig061410-ZebTARs.A021 | 0.244 | 0.612 | 0.399 |
| contig086344-BriTARs.A020 | contig059673-BurTARs.A016 | 0.311 | 0.779 | 0.399 |

|                           |                           |       |       |       |
|---------------------------|---------------------------|-------|-------|-------|
| contig022320-TiITARs.A059 | contig066330-ZebTARs.A027 | 0.325 | 0.814 | 0.399 |
| contig084876-BriTARs.A015 | contig053145-ZebTARs.A028 | 0.276 | 0.692 | 0.399 |
| contig022354-TiITARs.A037 | contig022362-TiITARs.A042 | 0.170 | 0.424 | 0.399 |
| contig022345-TiITARs.A034 | contig040586-ZebTAR.A002  | 0.422 | 1.056 | 0.399 |
| contig049534-BurTARs.A025 | contig022324-TiITARs.A027 | 0.164 | 0.411 | 0.399 |
| contig022334-TiITARs.A030 | contig066056-ZebTARs.A017 | 0.337 | 0.844 | 0.399 |
| contig022334-TiITARs.A030 | contig053145-ZebTARs.A028 | 0.303 | 0.759 | 0.400 |
| contig007524-TiITARs.A026 | contig040586-ZebTAR.A002  | 0.439 | 1.099 | 0.400 |
| contig055697-BurTARs.A022 | contig049540-BurTARs.A024 | 0.332 | 0.831 | 0.400 |
| contig046010-NyeTARs.A019 | contig022362-TiITARs.A042 | 0.155 | 0.388 | 0.400 |
| contig086337-BriTARs.A019 | contig022379-TiITARs.A052 | 0.273 | 0.683 | 0.400 |
| contig041024-BurTARs.A026 | contig022354-TiITARs.A037 | 0.149 | 0.373 | 0.400 |
| contig007518-TiITARs.A019 | contig022383-TiITARs.A054 | 0.357 | 0.893 | 0.400 |
| contig086344-BriTARs.A020 | contig022320-TiITARs.A059 | 0.325 | 0.813 | 0.400 |
| contig022382-TiITARs.A053 | contig059768-ZebTARs.A022 | 0.346 | 0.865 | 0.400 |
| contig060105-NyeTARs.A018 | contig062676-ZebTARs.A019 | 0.309 | 0.773 | 0.400 |
| contig049534-BurTARs.A025 | contig022334-TiITARs.A029 | 0.145 | 0.363 | 0.400 |
| contig022355-TiITARs.A039 | contig030471-ZebTARs.A024 | 0.105 | 0.264 | 0.400 |
| contig035375-NyeTARs.A013 | contig039642-TiITAR.A004  | 0.376 | 0.940 | 0.400 |
| contig040586-ZebTAR.A002  | contig030445-ZebTARs.A026 | 0.378 | 0.946 | 0.400 |
| contig046010-NyeTARs.A019 | contig022368-TiITARs.A047 | 0.146 | 0.365 | 0.400 |
| contig022355-TiITARs.A039 | contig022365-TiITARs.A045 | 0.129 | 0.324 | 0.400 |
| contig084887-BriTARs.A018 | contig022345-TiITARs.A034 | 0.133 | 0.332 | 0.400 |
| contig060105-NyeTARs.A018 | contig030464-ZebTARs.A025 | 0.344 | 0.860 | 0.400 |
| contig058002-NyeTARs.A025 | contig061410-ZebTARs.A021 | 0.301 | 0.753 | 0.400 |
| contig054630-BurTARs.A023 | contig057305-BurTARs.A031 | 0.387 | 0.968 | 0.400 |
| contig054630-BurTARs.A023 | contig060292-NyeTARs.A027 | 0.387 | 0.968 | 0.400 |
| contig045088-TiITARs.A057 | contig066330-ZebTARs.A027 | 0.286 | 0.714 | 0.400 |
| contig046010-NyeTARs.A019 | contig030471-ZebTARs.A024 | 0.150 | 0.375 | 0.400 |
| contig007520-TiITARs.A025 | contig040586-ZebTAR.A002  | 0.432 | 1.080 | 0.400 |
| contig039640-TiITAR.A002  | contig022390-TiITARs.A055 | 0.432 | 1.080 | 0.400 |
| contig039640-TiITAR.A002  | contig022390-TiITARs.A056 | 0.402 | 1.004 | 0.400 |
| contig035381-NyeTARs.A015 | contig039640-TiITAR.A003  | 0.376 | 0.940 | 0.400 |
| contig054630-BurTARs.A023 | contig022365-TiITARs.A045 | 0.356 | 0.889 | 0.400 |
| contig065494-BurTARs.A030 | contig022341-TiITARs.A032 | 0.322 | 0.805 | 0.400 |
| contig057145-BurTARs.A018 | contig022362-TiITARs.A042 | 0.152 | 0.379 | 0.401 |
| contig038663-NyeTAR.A005  | contig022343-TiITARs.A033 | 0.439 | 1.096 | 0.401 |
| contig045999-NyeTARs.A026 | contig039640-TiITAR.A002  | 0.465 | 1.161 | 0.401 |
| contig086337-BriTARs.A019 | contig022353-TiITARs.A036 | 0.334 | 0.833 | 0.401 |
| contig022341-TiITARs.A032 | contig022362-TiITARs.A042 | 0.155 | 0.387 | 0.401 |
| contig035377-NyeTARs.A023 | contig039640-TiITAR.A003  | 0.400 | 0.998 | 0.401 |
| contig007524-TiITARs.A026 | contig062676-ZebTARs.A019 | 0.325 | 0.810 | 0.401 |
| contig022355-TiITARs.A039 | contig022377-TiITARs.A050 | 0.138 | 0.346 | 0.401 |
| contig022345-TiITARs.A034 | contig030471-ZebTARs.A024 | 0.126 | 0.315 | 0.401 |
| contig022324-TiITARs.A027 | contig040586-ZebTAR.A001  | 0.453 | 1.131 | 0.401 |
| contig056023-BurTARs.A019 | contig039640-TiITAR.A003  | 0.440 | 1.099 | 0.401 |
| contig055697-BurTARs.A022 | contig057305-BurTARs.A031 | 0.282 | 0.704 | 0.401 |
| contig054630-BurTARs.A023 | contig022341-TiITARs.A032 | 0.355 | 0.886 | 0.401 |
| contig061410-ZebTARs.A021 | contig066330-ZebTARs.A027 | 0.272 | 0.678 | 0.401 |
| contig007520-TiITARs.A025 | contig040586-ZebTAR.A001  | 0.433 | 1.079 | 0.401 |
| contig060105-NyeTARs.A018 | contig022320-TiITARs.A059 | 0.318 | 0.793 | 0.401 |
| contig061091-BurTARs.A014 | contig007518-TiITARs.A019 | 0.371 | 0.926 | 0.401 |
| contig053145-ZebTARs.A028 | contig030440-ZebTARs.A029 | 0.279 | 0.696 | 0.401 |

|                           |                           |       |       |       |
|---------------------------|---------------------------|-------|-------|-------|
| contig038663-NyeTAR.A005  | contig022337-TiITARs.A031 | 0.452 | 1.126 | 0.401 |
| contig022375-TiITARs.A048 | contig056134-TiITARs.A058 | 0.346 | 0.862 | 0.401 |
| contig045302-BurTAR.A001  | contig046013-NyeTARs.A021 | 0.436 | 1.087 | 0.401 |
| contig058002-NyeTARs.A025 | contig060292-NyeTARs.A027 | 0.251 | 0.626 | 0.401 |
| contig061977-BurTARs.A012 | contig038663-NyeTAR.A005  | 0.398 | 0.991 | 0.401 |
| contig022382-TiITARs.A053 | contig056134-TiITARs.A058 | 0.353 | 0.879 | 0.401 |
| contig061433-BurTARs.A013 | contig061417-ZebTARs.A020 | 0.165 | 0.410 | 0.401 |
| contig062039-NyeTARs.A022 | contig060292-NyeTARs.A027 | 0.362 | 0.902 | 0.401 |
| contig084880-BriTARs.A016 | contig054630-BurTARs.A023 | 0.403 | 1.005 | 0.401 |
| contig040586-ZebTAR.A001  | contig030471-ZebTARs.A024 | 0.457 | 1.138 | 0.401 |
| contig045302-BurTAR.A001  | contig022363-TiITARs.A044 | 0.415 | 1.034 | 0.401 |
| contig046010-NyeTARs.A019 | contig022365-TiITARs.A045 | 0.148 | 0.369 | 0.401 |
| contig022349-TiITARs.A035 | contig056134-TiITARs.A058 | 0.377 | 0.939 | 0.401 |
| contig046014-NyeTARs.A024 | contig022368-TiITARs.A047 | 0.120 | 0.299 | 0.401 |
| contig057148-BurTARs.A028 | contig022355-TiITARs.A039 | 0.138 | 0.344 | 0.401 |
| contig084887-BriTARs.A018 | contig056021-BurTARs.A020 | 0.117 | 0.290 | 0.401 |
| contig086344-BriTARs.A020 | contig022368-TiITARs.A047 | 0.341 | 0.848 | 0.401 |
| contig035376-NyeTARs.A014 | contig040586-ZebTAR.A002  | 0.394 | 0.982 | 0.401 |
| contig061977-BurTARs.A012 | contig022375-TiITARs.A048 | 0.211 | 0.526 | 0.401 |
| contig039642-TiITAR.A004  | contig022357-TiITARs.A041 | 0.439 | 1.094 | 0.401 |
| contig022354-TiITARs.A038 | contig022365-TiITARs.A045 | 0.135 | 0.336 | 0.401 |
| contig035381-NyeTARs.A015 | contig066285-ZebTARs.A016 | 0.265 | 0.660 | 0.401 |
| contig054630-BurTARs.A023 | contig045999-NyeTARs.A026 | 0.401 | 1.000 | 0.402 |
| contig022390-TiITARs.A055 | contig053139-ZebTARs.A023 | 0.300 | 0.747 | 0.402 |
| contig046011-NyeTARs.A016 | contig023443-TiITAR.A005  | 0.429 | 1.069 | 0.402 |
| contig059766-BurTARs.A029 | contig022377-TiITARs.A050 | 0.340 | 0.846 | 0.402 |
| contig057301-BurTARs.A017 | contig049534-BurTARs.A025 | 0.376 | 0.936 | 0.402 |
| contig035381-NyeTARs.A015 | contig007520-TiITARs.A025 | 0.304 | 0.757 | 0.402 |
| contig022357-TiITARs.A041 | contig040586-ZebTAR.A001  | 0.440 | 1.095 | 0.402 |
| contig086337-BriTARs.A019 | contig046011-NyeTARs.A016 | 0.387 | 0.963 | 0.402 |
| contig056021-BurTARs.A020 | contig056134-TiITARs.A058 | 0.357 | 0.889 | 0.402 |
| contig084886-BriTARs.A017 | contig007518-TiITARs.A019 | 0.366 | 0.910 | 0.402 |
| contig046007-NyeTARs.A017 | contig061417-ZebTARs.A020 | 0.123 | 0.305 | 0.402 |
| contig022365-TiITARs.A045 | contig061410-ZebTARs.A021 | 0.252 | 0.626 | 0.402 |
| contig022377-TiITARs.A050 | contig066330-ZebTARs.A027 | 0.341 | 0.847 | 0.402 |
| contig055697-BurTARs.A022 | contig022362-TiITARs.A042 | 0.319 | 0.795 | 0.402 |
| contig057148-BurTARs.A028 | contig059766-BurTARs.A029 | 0.352 | 0.875 | 0.402 |
| contig084876-BriTARs.A015 | contig040586-ZebTAR.A002  | 0.421 | 1.047 | 0.402 |
| contig059673-BurTARs.A016 | contig062676-ZebTARs.A019 | 0.332 | 0.826 | 0.402 |
| contig007524-TiITARs.A026 | contig040586-ZebTAR.A001  | 0.438 | 1.089 | 0.402 |
| contig029633-BriTAR.A003  | contig061410-ZebTARs.A021 | 0.414 | 1.028 | 0.402 |
| contig084886-BriTARs.A017 | contig061977-BurTARs.A012 | 0.246 | 0.611 | 0.402 |
| contig060105-NyeTARs.A018 | contig046010-NyeTARs.A019 | 0.346 | 0.860 | 0.402 |
| contig039642-TiITAR.A004  | contig022345-TiITARs.A034 | 0.413 | 1.027 | 0.402 |
| contig062039-NyeTARs.A022 | contig062677-ZebTARs.A018 | 0.256 | 0.637 | 0.402 |
| contig054630-BurTARs.A023 | contig049534-BurTARs.A025 | 0.391 | 0.971 | 0.402 |
| contig061091-BurTARs.A014 | contig022355-TiITARs.A039 | 0.083 | 0.205 | 0.402 |
| contig022363-TiITARs.A043 | contig061417-ZebTARs.A020 | 0.151 | 0.374 | 0.403 |
| contig022330-TiITARs.A028 | contig022368-TiITARs.A046 | 0.133 | 0.330 | 0.403 |
| contig061433-BurTARs.A013 | contig061091-BurTARs.A014 | 0.159 | 0.395 | 0.403 |
| contig084886-BriTARs.A017 | contig022356-TiITARs.A040 | 0.130 | 0.324 | 0.403 |
| contig039639-TiITAR.A001  | contig066890-ZebTARs.A014 | 0.414 | 1.027 | 0.403 |
| contig007520-TiITARs.A025 | contig022354-TiITARs.A038 | 0.340 | 0.844 | 0.403 |



|                           |                           |       |       |       |
|---------------------------|---------------------------|-------|-------|-------|
| contig022365-TiITARs.A045 | contig056134-TiITARs.A058 | 0.349 | 0.867 | 0.403 |
| contig060707-BurTARs.A015 | contig041024-BurTARs.A026 | 0.314 | 0.779 | 0.403 |
| contig029633-BriTAR.A003  | contig022341-TiITARs.A032 | 0.434 | 1.077 | 0.403 |
| contig056020-BurTARs.A021 | contig022368-TiITARs.A046 | 0.130 | 0.322 | 0.403 |
| contig042499-NyeTARs.A028 | contig039639-TiITAR.A001  | 0.466 | 1.156 | 0.403 |
| contig039642-TiITAR.A004  | contig022383-TiITARs.A054 | 0.389 | 0.965 | 0.403 |
| contig022363-TiITARs.A044 | contig056134-TiITARs.A058 | 0.358 | 0.888 | 0.403 |
| contig061977-BurTARs.A012 | contig007512-TiITARs.A024 | 0.276 | 0.685 | 0.403 |
| contig022324-TiITARs.A027 | contig059768-ZebTARs.A022 | 0.409 | 1.015 | 0.403 |
| contig084868-BriTARs.A014 | contig061410-ZebTARs.A021 | 0.155 | 0.386 | 0.403 |
| contig022334-TiITARs.A030 | contig066285-ZebTARs.A016 | 0.220 | 0.545 | 0.403 |
| contig059766-BurTARs.A029 | contig030440-ZebTARs.A029 | 0.281 | 0.697 | 0.403 |
| contig046010-NyeTARs.A019 | contig022378-TiITARs.A051 | 0.246 | 0.609 | 0.403 |
| contig055697-BurTARs.A022 | contig007524-TiITARs.A026 | 0.240 | 0.596 | 0.403 |
| contig056021-BurTARs.A020 | contig046007-NyeTARs.A017 | 0.130 | 0.323 | 0.403 |
| contig035381-NyeTARs.A015 | contig053145-ZebTARs.A028 | 0.254 | 0.630 | 0.403 |
| contig084886-BriTARs.A017 | contig066285-ZebTARs.A016 | 0.167 | 0.413 | 0.403 |
| contig056020-BurTARs.A021 | contig030464-ZebTARs.A025 | 0.136 | 0.337 | 0.404 |
| contig035375-NyeTARs.A013 | contig040586-ZebTAR.A002  | 0.386 | 0.956 | 0.404 |
| contig054630-BurTARs.A023 | contig022334-TiITARs.A029 | 0.353 | 0.875 | 0.404 |
| contig055697-BurTARs.A022 | contig060292-NyeTARs.A027 | 0.280 | 0.694 | 0.404 |
| contig062039-NyeTARs.A022 | contig035377-NyeTARs.A023 | 0.244 | 0.604 | 0.404 |
| contig049534-BurTARs.A025 | contig042499-NyeTARs.A028 | 0.378 | 0.935 | 0.404 |
| contig040586-ZebTAR.A001  | contig061410-ZebTARs.A021 | 0.400 | 0.991 | 0.404 |
| contig022341-TiITARs.A032 | contig022383-TiITARs.A054 | 0.250 | 0.619 | 0.404 |
| contig054630-BurTARs.A023 | contig022362-TiITARs.A042 | 0.351 | 0.869 | 0.404 |
| contig056134-TiITARs.A058 | contig062677-ZebTARs.A018 | 0.362 | 0.896 | 0.404 |
| contig022378-TiITARs.A051 | contig022383-TiITARs.A054 | 0.229 | 0.568 | 0.404 |
| contig029633-BriTAR.A003  | contig022377-TiITARs.A050 | 0.432 | 1.069 | 0.404 |
| contig034854-BurTARs.A027 | contig039642-TiITAR.A004  | 0.372 | 0.920 | 0.404 |
| contig061091-BurTARs.A014 | contig046007-NyeTARs.A017 | 0.090 | 0.224 | 0.404 |
| contig054630-BurTARs.A023 | contig062677-ZebTARs.A018 | 0.374 | 0.925 | 0.404 |
| contig046014-NyeTARs.A024 | contig022368-TiITARs.A046 | 0.111 | 0.275 | 0.404 |
| contig038663-NyeTAR.A005  | contig046013-NyeTARs.A021 | 0.450 | 1.113 | 0.404 |
| contig056020-BurTARs.A021 | contig022353-TiITARs.A036 | 0.085 | 0.211 | 0.404 |
| contig084886-BriTARs.A017 | contig060105-NyeTARs.A018 | 0.332 | 0.821 | 0.404 |
| contig055697-BurTARs.A022 | contig066691-ZebTARs.A015 | 0.358 | 0.885 | 0.404 |
| contig007512-TiITARs.A024 | contig022324-TiITARs.A027 | 0.336 | 0.832 | 0.404 |
| contig057305-BurTARs.A031 | contig022362-TiITARs.A042 | 0.386 | 0.955 | 0.404 |
| contig060292-NyeTARs.A027 | contig022362-TiITARs.A042 | 0.386 | 0.955 | 0.404 |
| contig039640-TiITAR.A002  | contig066890-ZebTARs.A014 | 0.402 | 0.994 | 0.404 |
| contig056020-BurTARs.A021 | contig066056-ZebTARs.A017 | 0.333 | 0.823 | 0.404 |
| contig035381-NyeTARs.A015 | contig022349-TiITARs.A035 | 0.251 | 0.622 | 0.404 |
| contig055697-BurTARs.A022 | contig022343-TiITARs.A033 | 0.316 | 0.782 | 0.404 |
| contig022334-TiITARs.A030 | contig053139-ZebTARs.A023 | 0.348 | 0.860 | 0.404 |
| contig060707-BurTARs.A015 | contig022354-TiITARs.A038 | 0.331 | 0.819 | 0.404 |
| contig022341-TiITARs.A032 | contig030464-ZebTARs.A025 | 0.135 | 0.333 | 0.404 |
| contig029633-BriTAR.A003  | contig046014-NyeTARs.A024 | 0.435 | 1.076 | 0.404 |
| contig049534-BurTARs.A025 | contig040586-ZebTAR.A001  | 0.454 | 1.124 | 0.404 |
| contig022353-TiITARs.A036 | contig022354-TiITARs.A038 | 0.127 | 0.314 | 0.404 |
| contig086344-BriTARs.A020 | contig054630-BurTARs.A023 | 0.352 | 0.870 | 0.405 |
| contig035377-NyeTARs.A023 | contig007520-TiITARs.A025 | 0.322 | 0.796 | 0.405 |
| contig022343-TiITARs.A033 | contig053145-ZebTARs.A028 | 0.333 | 0.822 | 0.405 |

|                           |                           |       |       |       |
|---------------------------|---------------------------|-------|-------|-------|
| contig084876-BriTARs.A015 | contig059766-BurTARs.A029 | 0.280 | 0.693 | 0.405 |
| contig007520-TiITARs.A025 | contig022341-TiITARs.A032 | 0.347 | 0.857 | 0.405 |
| contig049534-BurTARs.A025 | contig060105-NyeTARs.A018 | 0.331 | 0.818 | 0.405 |
| contig059766-BurTARs.A029 | contig022334-TiITARs.A030 | 0.308 | 0.761 | 0.405 |
| contig038663-NyeTAR.A005  | contig022363-TiITARs.A044 | 0.421 | 1.041 | 0.405 |
| contig084880-BriTARs.A016 | contig039639-TiITAR.A001  | 0.450 | 1.112 | 0.405 |
| contig022354-TiITARs.A037 | contig022320-TiITARs.A059 | 0.155 | 0.384 | 0.405 |
| contig084868-BriTARs.A014 | contig039639-TiITAR.A001  | 0.392 | 0.968 | 0.405 |
| contig057148-BurTARs.A028 | contig022378-TiITARs.A051 | 0.243 | 0.601 | 0.405 |
| contig061417-ZebTARs.A020 | contig030464-ZebTARs.A025 | 0.136 | 0.337 | 0.405 |
| contig029633-BriTAR.A003  | contig084876-BriTARs.A015 | 0.428 | 1.056 | 0.405 |
| contig035381-NyeTARs.A015 | contig039642-TiITAR.A004  | 0.376 | 0.929 | 0.405 |
| contig022334-TiITARs.A030 | contig022341-TiITARs.A032 | 0.166 | 0.410 | 0.405 |
| contig022341-TiITARs.A032 | contig022355-TiITARs.A039 | 0.122 | 0.301 | 0.405 |
| contig022362-TiITARs.A042 | contig053145-ZebTARs.A028 | 0.322 | 0.795 | 0.405 |
| contig084880-BriTARs.A016 | contig046010-NyeTARs.A019 | 0.185 | 0.457 | 0.405 |
| contig084876-BriTARs.A015 | contig058002-NyeTARs.A025 | 0.310 | 0.764 | 0.405 |
| contig084887-BriTARs.A018 | contig046010-NyeTARs.A019 | 0.148 | 0.366 | 0.405 |
| contig084887-BriTARs.A018 | contig022330-TiITARs.A028 | 0.114 | 0.281 | 0.405 |
| contig086337-BriTARs.A019 | contig030440-ZebTARs.A029 | 0.283 | 0.698 | 0.405 |
| contig084868-BriTARs.A014 | contig022341-TiITARs.A032 | 0.263 | 0.649 | 0.405 |
| contig022341-TiITARs.A032 | contig066330-ZebTARs.A027 | 0.324 | 0.800 | 0.405 |
| contig029633-BriTAR.A003  | contig007524-TiITARs.A026 | 0.458 | 1.130 | 0.405 |
| contig049534-BurTARs.A025 | contig022368-TiITARs.A046 | 0.161 | 0.396 | 0.405 |
| contig086351-BriTARs.A021 | contig054630-BurTARs.A023 | 0.392 | 0.967 | 0.405 |
| contig084876-BriTARs.A015 | contig056134-TiITARs.A058 | 0.301 | 0.744 | 0.405 |
| contig054630-BurTARs.A023 | contig056200-NyeTARs.A029 | 0.376 | 0.926 | 0.405 |
| contig084880-BriTARs.A016 | contig059768-ZebTARs.A022 | 0.396 | 0.977 | 0.405 |
| contig029633-BriTAR.A003  | contig049534-BurTARs.A025 | 0.451 | 1.113 | 0.405 |
| contig007520-TiITARs.A025 | contig022334-TiITARs.A030 | 0.334 | 0.823 | 0.406 |
| contig060105-NyeTARs.A018 | contig022382-TiITARs.A053 | 0.324 | 0.799 | 0.406 |
| contig045999-NyeTARs.A026 | contig059768-ZebTARs.A022 | 0.394 | 0.972 | 0.406 |
| contig086344-BriTARs.A020 | contig022349-TiITARs.A035 | 0.358 | 0.881 | 0.406 |
| contig060105-NyeTARs.A018 | contig022368-TiITARs.A047 | 0.336 | 0.828 | 0.406 |
| contig065494-BurTARs.A030 | contig022334-TiITARs.A030 | 0.311 | 0.767 | 0.406 |
| contig035375-NyeTARs.A013 | contig053139-ZebTARs.A023 | 0.280 | 0.690 | 0.406 |
| contig045302-BurTAR.A001  | contig030471-ZebTARs.A024 | 0.449 | 1.106 | 0.406 |
| contig022353-TiITARs.A036 | contig022377-TiITARs.A050 | 0.139 | 0.343 | 0.406 |
| contig061091-BurTARs.A014 | contig022324-TiITARs.A027 | 0.158 | 0.391 | 0.406 |
| contig056134-TiITARs.A058 | contig030464-ZebTARs.A025 | 0.353 | 0.870 | 0.406 |
| contig022341-TiITARs.A032 | contig059768-ZebTARs.A022 | 0.349 | 0.861 | 0.406 |
| contig059766-BurTARs.A029 | contig035381-NyeTARs.A015 | 0.256 | 0.631 | 0.406 |
| contig029633-BriTAR.A003  | contig022334-TiITARs.A029 | 0.444 | 1.093 | 0.406 |
| contig034854-BurTARs.A027 | contig039640-TiITAR.A003  | 0.375 | 0.925 | 0.406 |
| contig022345-TiITARs.A034 | contig022356-TiITARs.A040 | 0.115 | 0.282 | 0.406 |
| contig065494-BurTARs.A030 | contig022334-TiITARs.A029 | 0.340 | 0.837 | 0.406 |
| contig046013-NyeTARs.A021 | contig066056-ZebTARs.A017 | 0.328 | 0.808 | 0.406 |
| contig022377-TiITARs.A050 | contig053139-ZebTARs.A023 | 0.345 | 0.849 | 0.406 |
| contig041024-BurTARs.A026 | contig061417-ZebTARs.A020 | 0.106 | 0.261 | 0.406 |
| contig007512-TiITARs.A024 | contig007520-TiITARs.A025 | 0.238 | 0.585 | 0.406 |
| contig022337-TiITARs.A031 | contig022365-TiITARs.A045 | 0.153 | 0.377 | 0.406 |
| contig084876-BriTARs.A015 | contig086337-BriTARs.A019 | 0.278 | 0.684 | 0.406 |
| contig065494-BurTARs.A030 | contig035381-NyeTARs.A015 | 0.259 | 0.637 | 0.406 |

|                           |                           |       |       |       |
|---------------------------|---------------------------|-------|-------|-------|
| contig022324-TiITARs.A027 | contig022354-TiITARs.A037 | 0.201 | 0.494 | 0.406 |
| contig084876-BriTARs.A015 | contig007520-TiITARs.A025 | 0.311 | 0.764 | 0.406 |
| contig061977-BurTARs.A012 | contig022330-TiITARs.A028 | 0.230 | 0.565 | 0.406 |
| contig058002-NyeTARs.A025 | contig022379-TiITARs.A052 | 0.295 | 0.727 | 0.406 |
| contig084886-BriTARs.A017 | contig061410-ZebTARs.A021 | 0.248 | 0.610 | 0.406 |
| contig039642-TiITAR.A004  | contig061410-ZebTARs.A021 | 0.397 | 0.977 | 0.406 |
| contig057145-BurTARs.A018 | contig022337-TiITARs.A031 | 0.137 | 0.336 | 0.406 |
| contig022365-TiITARs.A045 | contig059768-ZebTARs.A022 | 0.351 | 0.864 | 0.406 |
| contig057145-BurTARs.A018 | contig053145-ZebTARs.A028 | 0.355 | 0.874 | 0.407 |
| contig086344-BriTARs.A020 | contig057148-BurTARs.A028 | 0.345 | 0.849 | 0.407 |
| contig022337-TiITARs.A031 | contig022368-TiITARs.A047 | 0.156 | 0.385 | 0.407 |
| contig042499-NyeTARs.A028 | contig040586-ZebTAR.A002  | 0.471 | 1.158 | 0.407 |
| contig056023-BurTARs.A019 | contig039640-TiITAR.A002  | 0.465 | 1.143 | 0.407 |
| contig032272-NyeTAR.A004  | contig066285-ZebTARs.A016 | 0.403 | 0.989 | 0.407 |
| contig065494-BurTARs.A030 | contig022379-TiITARs.A052 | 0.269 | 0.662 | 0.407 |
| contig045999-NyeTARs.A026 | contig040586-ZebTAR.A001  | 0.447 | 1.098 | 0.407 |
| contig007520-TiITARs.A025 | contig053139-ZebTARs.A023 | 0.234 | 0.575 | 0.407 |
| contig082565-BriTARs.A022 | contig040586-ZebTAR.A002  | 0.384 | 0.943 | 0.407 |
| contig084876-BriTARs.A015 | contig039642-TiITAR.A004  | 0.408 | 1.002 | 0.407 |
| contig065494-BurTARs.A030 | contig030445-ZebTARs.A026 | 0.255 | 0.627 | 0.407 |
| contig035375-NyeTARs.A013 | contig022334-TiITARs.A030 | 0.246 | 0.604 | 0.407 |
| contig041024-BurTARs.A026 | contig061410-ZebTARs.A021 | 0.238 | 0.584 | 0.407 |
| contig057148-BurTARs.A028 | contig062676-ZebTARs.A019 | 0.248 | 0.609 | 0.407 |
| contig055697-BurTARs.A022 | contig062677-ZebTARs.A018 | 0.334 | 0.820 | 0.407 |
| contig022354-TiITARs.A038 | contig056134-TiITARs.A058 | 0.337 | 0.827 | 0.407 |
| contig035375-NyeTARs.A013 | contig056134-TiITARs.A058 | 0.290 | 0.711 | 0.408 |
| contig045088-TiITARs.A057 | contig040586-ZebTAR.A001  | 0.492 | 1.208 | 0.408 |
| contig065494-BurTARs.A030 | contig022375-TiITARs.A048 | 0.316 | 0.775 | 0.408 |
| contig086344-BriTARs.A020 | contig041024-BurTARs.A026 | 0.322 | 0.790 | 0.408 |
| contig045302-BurTAR.A001  | contig049534-BurTARs.A025 | 0.448 | 1.098 | 0.408 |
| contig007520-TiITARs.A025 | contig022379-TiITARs.A052 | 0.296 | 0.726 | 0.408 |
| contig084876-BriTARs.A015 | contig046010-NyeTARs.A019 | 0.261 | 0.641 | 0.408 |
| contig084887-BriTARs.A018 | contig022354-TiITARs.A038 | 0.136 | 0.332 | 0.408 |
| contig046010-NyeTARs.A019 | contig022383-TiITARs.A054 | 0.256 | 0.628 | 0.408 |
| contig045302-BurTAR.A001  | contig056021-BurTARs.A020 | 0.422 | 1.035 | 0.408 |
| contig084880-BriTARs.A016 | contig030464-ZebTARs.A025 | 0.187 | 0.458 | 0.408 |
| contig062039-NyeTARs.A022 | contig056200-NyeTARs.A029 | 0.255 | 0.626 | 0.408 |
| contig046010-NyeTARs.A019 | contig045088-TiITARs.A057 | 0.374 | 0.916 | 0.408 |
| contig007512-TiITARs.A024 | contig007524-TiITARs.A026 | 0.248 | 0.608 | 0.408 |
| contig007512-TiITARs.A024 | contig030440-ZebTARs.A029 | 0.285 | 0.698 | 0.408 |
| contig057305-BurTARs.A031 | contig059768-ZebTARs.A022 | 0.383 | 0.939 | 0.408 |
| contig060292-NyeTARs.A027 | contig059768-ZebTARs.A022 | 0.383 | 0.939 | 0.408 |
| contig046007-NyeTARs.A017 | contig066056-ZebTARs.A017 | 0.337 | 0.826 | 0.408 |
| contig049540-BurTARs.A024 | contig053139-ZebTARs.A023 | 0.333 | 0.815 | 0.408 |
| contig046013-NyeTARs.A021 | contig066285-ZebTARs.A016 | 0.161 | 0.394 | 0.408 |
| contig022383-TiITARs.A054 | contig030464-ZebTARs.A025 | 0.263 | 0.645 | 0.408 |
| contig084880-BriTARs.A016 | contig045302-BurTAR.A001  | 0.458 | 1.123 | 0.408 |
| contig045302-BurTAR.A001  | contig022357-TiITARs.A041 | 0.443 | 1.087 | 0.408 |
| contig046011-NyeTARs.A016 | contig053145-ZebTARs.A028 | 0.378 | 0.927 | 0.408 |
| contig046013-NyeTARs.A021 | contig022390-TiITARs.A055 | 0.207 | 0.508 | 0.408 |
| contig007512-TiITARs.A024 | contig061410-ZebTARs.A021 | 0.273 | 0.668 | 0.408 |
| contig084868-BriTARs.A014 | contig022377-TiITARs.A050 | 0.260 | 0.636 | 0.408 |
| contig042499-NyeTARs.A028 | contig039640-TiITAR.A002  | 0.471 | 1.154 | 0.408 |

|                           |                           |       |       |       |
|---------------------------|---------------------------|-------|-------|-------|
| contig022390-TiITARs.A055 | contig053145-ZebTARs.A028 | 0.264 | 0.646 | 0.408 |
| contig022390-TiITARs.A055 | contig066330-ZebTARs.A027 | 0.264 | 0.646 | 0.408 |
| contig022334-TiITARs.A029 | contig059768-ZebTARs.A022 | 0.347 | 0.849 | 0.408 |
| contig057145-BurTARs.A018 | contig059766-BurTARs.A029 | 0.357 | 0.875 | 0.408 |
| contig056020-BurTARs.A021 | contig046010-NyeTARs.A019 | 0.138 | 0.338 | 0.408 |
| contig007520-TiITARs.A025 | contig022365-TiITARs.A045 | 0.369 | 0.905 | 0.408 |
| contig023443-TiITAR.A005  | contig066285-ZebTARs.A016 | 0.393 | 0.962 | 0.408 |
| contig039642-TiITAR.A004  | contig007518-TiITARs.A019 | 0.473 | 1.159 | 0.408 |
| contig038663-NyeTAR.A005  | contig045088-TiITARs.A057 | 0.494 | 1.209 | 0.409 |
| contig046011-NyeTARs.A016 | contig003909-ZebTAR.A003  | 0.450 | 1.102 | 0.409 |
| contig041024-BurTARs.A026 | contig060105-NyeTARs.A018 | 0.315 | 0.771 | 0.409 |
| contig061433-BurTARs.A013 | contig003909-ZebTAR.A003  | 0.423 | 1.035 | 0.409 |
| contig062677-ZebTARs.A018 | contig059768-ZebTARs.A022 | 0.367 | 0.898 | 0.409 |
| contig056021-BurTARs.A020 | contig040586-ZebTAR.A001  | 0.428 | 1.047 | 0.409 |
| contig046014-NyeTARs.A024 | contig066691-ZebTARs.A015 | 0.112 | 0.274 | 0.409 |
| contig022368-TiITARs.A046 | contig059768-ZebTARs.A022 | 0.358 | 0.875 | 0.409 |
| contig086337-BriTARs.A019 | contig034854-BurTARs.A027 | 0.302 | 0.737 | 0.409 |
| contig046007-NyeTARs.A017 | contig022356-TiITARs.A040 | 0.124 | 0.302 | 0.409 |
| contig054630-BurTARs.A023 | contig022377-TiITARs.A050 | 0.371 | 0.907 | 0.409 |
| contig046011-NyeTARs.A016 | contig040586-ZebTAR.A001  | 0.510 | 1.248 | 0.409 |
| contig084868-BriTARs.A014 | contig022379-TiITARs.A052 | 0.158 | 0.387 | 0.409 |
| contig060105-NyeTARs.A018 | contig061410-ZebTARs.A021 | 0.312 | 0.764 | 0.409 |
| contig029633-BriTAR.A003  | contig066285-ZebTARs.A016 | 0.451 | 1.102 | 0.409 |
| contig059766-BurTARs.A029 | contig022343-TiITARs.A033 | 0.337 | 0.823 | 0.409 |
| contig082565-BriTARs.A022 | contig007520-TiITARs.A025 | 0.313 | 0.765 | 0.409 |
| contig059673-BurTARs.A016 | contig040586-ZebTAR.A002  | 0.462 | 1.128 | 0.409 |
| contig032272-NyeTAR.A004  | contig046011-NyeTARs.A016 | 0.451 | 1.101 | 0.409 |
| contig022354-TiITARs.A038 | contig061417-ZebTARs.A020 | 0.121 | 0.295 | 0.409 |
| contig056023-BurTARs.A019 | contig038663-NyeTAR.A005  | 0.446 | 1.090 | 0.409 |
| contig022379-TiITARs.A052 | contig066330-ZebTARs.A027 | 0.269 | 0.658 | 0.409 |
| contig029633-BriTAR.A003  | contig022324-TiITARs.A027 | 0.476 | 1.162 | 0.409 |
| contig038663-NyeTAR.A005  | contig022368-TiITARs.A047 | 0.439 | 1.073 | 0.409 |
| contig059673-BurTARs.A016 | contig040586-ZebTAR.A001  | 0.458 | 1.118 | 0.409 |
| contig046010-NyeTARs.A019 | contig042499-NyeTARs.A028 | 0.368 | 0.899 | 0.409 |
| contig035381-NyeTARs.A015 | contig040586-ZebTAR.A002  | 0.386 | 0.943 | 0.410 |
| contig029633-BriTAR.A003  | contig061433-BurTARs.A013 | 0.458 | 1.118 | 0.410 |
| contig056200-NyeTARs.A029 | contig056134-TiITARs.A058 | 0.362 | 0.883 | 0.410 |
| contig046010-NyeTARs.A019 | contig045999-NyeTARs.A026 | 0.181 | 0.442 | 0.410 |
| contig046011-NyeTARs.A016 | contig066330-ZebTARs.A027 | 0.388 | 0.946 | 0.410 |
| contig022375-TiITARs.A048 | contig040586-ZebTAR.A001  | 0.401 | 0.980 | 0.410 |
| contig061433-BurTARs.A013 | contig066285-ZebTARs.A016 | 0.173 | 0.423 | 0.410 |
| contig058002-NyeTARs.A025 | contig066890-ZebTARs.A014 | 0.325 | 0.793 | 0.410 |
| contig022349-TiITARs.A035 | contig022356-TiITARs.A040 | 0.143 | 0.350 | 0.410 |
| contig059766-BurTARs.A029 | contig046011-NyeTARs.A016 | 0.381 | 0.929 | 0.410 |
| contig054630-BurTARs.A023 | contig066056-ZebTARs.A017 | 0.347 | 0.846 | 0.410 |
| contig045302-BurTAR.A001  | contig061417-ZebTARs.A020 | 0.422 | 1.030 | 0.410 |
| contig059766-BurTARs.A029 | contig022362-TiITARs.A042 | 0.326 | 0.796 | 0.410 |
| contig056023-BurTARs.A019 | contig054630-BurTARs.A023 | 0.404 | 0.985 | 0.410 |
| contig022383-TiITARs.A054 | contig040586-ZebTAR.A002  | 0.398 | 0.972 | 0.410 |
| contig061433-BurTARs.A013 | contig023443-TiITAR.A005  | 0.405 | 0.987 | 0.410 |
| contig045302-BurTAR.A001  | contig007524-TiITARs.A026 | 0.438 | 1.069 | 0.410 |
| contig040586-ZebTAR.A002  | contig030440-ZebTARs.A029 | 0.388 | 0.945 | 0.410 |
| contig035377-NyeTARs.A023 | contig022341-TiITARs.A032 | 0.257 | 0.625 | 0.410 |

|                           |                           |       |       |       |
|---------------------------|---------------------------|-------|-------|-------|
| contig056200-NyeTARs.A029 | contig059768-ZebTARs.A022 | 0.369 | 0.899 | 0.410 |
| contig084887-BriTARs.A018 | contig030464-ZebTARs.A025 | 0.150 | 0.366 | 0.410 |
| contig038663-NyeTAR.A005  | contig022379-TiITARs.A052 | 0.424 | 1.033 | 0.410 |
| contig084887-BriTARs.A018 | contig066056-ZebTARs.A017 | 0.316 | 0.770 | 0.410 |
| contig022375-TiITARs.A048 | contig066691-ZebTARs.A015 | 0.148 | 0.361 | 0.411 |
| contig022337-TiITARs.A031 | contig066285-ZebTARs.A016 | 0.151 | 0.367 | 0.411 |
| contig059673-BurTARs.A016 | contig039642-TiITAR.A004  | 0.455 | 1.109 | 0.411 |
| contig084886-BriTARs.A017 | contig022349-TiITARs.A035 | 0.149 | 0.362 | 0.411 |
| contig022334-TiITARs.A030 | contig022390-TiITARs.A055 | 0.260 | 0.633 | 0.411 |
| contig022349-TiITARs.A035 | contig022354-TiITARs.A037 | 0.175 | 0.425 | 0.411 |
| contig086337-BriTARs.A019 | contig022357-TiITARs.A041 | 0.369 | 0.898 | 0.411 |
| contig045999-NyeTARs.A026 | contig022390-TiITARs.A055 | 0.304 | 0.740 | 0.411 |
| contig022334-TiITARs.A029 | contig066330-ZebTARs.A027 | 0.342 | 0.832 | 0.411 |
| contig057148-BurTARs.A028 | contig046007-NyeTARs.A017 | 0.144 | 0.351 | 0.411 |
| contig022334-TiITARs.A030 | contig066330-ZebTARs.A027 | 0.313 | 0.762 | 0.411 |
| contig022345-TiITARs.A034 | contig056134-TiITARs.A058 | 0.354 | 0.860 | 0.411 |
| contig057305-BurTARs.A031 | contig022368-TiITARs.A046 | 0.393 | 0.957 | 0.411 |
| contig060292-NyeTARs.A027 | contig022368-TiITARs.A046 | 0.393 | 0.957 | 0.411 |
| contig022375-TiITARs.A048 | contig066285-ZebTARs.A016 | 0.174 | 0.423 | 0.411 |
| contig038663-NyeTAR.A005  | contig022324-TiITARs.A027 | 0.458 | 1.115 | 0.411 |
| contig040586-ZebTAR.A001  | contig061417-ZebTARs.A020 | 0.428 | 1.042 | 0.411 |
| contig007518-TiITARs.A019 | contig066691-ZebTARs.A015 | 0.375 | 0.912 | 0.411 |
| contig086337-BriTARs.A019 | contig022362-TiITARs.A042 | 0.323 | 0.786 | 0.411 |
| contig022337-TiITARs.A031 | contig022320-TiITARs.A059 | 0.141 | 0.343 | 0.411 |
| contig045302-BurTAR.A001  | contig056023-BurTARs.A019 | 0.452 | 1.099 | 0.411 |
| contig057145-BurTARs.A018 | contig046007-NyeTARs.A017 | 0.132 | 0.322 | 0.411 |
| contig022356-TiITARs.A040 | contig056134-TiITARs.A058 | 0.352 | 0.856 | 0.411 |
| contig035381-NyeTARs.A015 | contig066330-ZebTARs.A027 | 0.261 | 0.633 | 0.412 |
| contig045302-BurTAR.A001  | contig022375-TiITARs.A048 | 0.402 | 0.977 | 0.412 |
| contig086344-BriTARs.A020 | contig030464-ZebTARs.A025 | 0.344 | 0.836 | 0.412 |
| contig084876-BriTARs.A015 | contig065494-BurTARs.A030 | 0.283 | 0.688 | 0.412 |
| contig061433-BurTARs.A013 | contig057145-BurTARs.A018 | 0.172 | 0.418 | 0.412 |
| contig057145-BurTARs.A018 | contig057148-BurTARs.A028 | 0.144 | 0.351 | 0.412 |
| contig060105-NyeTARs.A018 | contig022354-TiITARs.A038 | 0.336 | 0.816 | 0.412 |
| contig022356-TiITARs.A040 | contig066056-ZebTARs.A017 | 0.333 | 0.808 | 0.412 |
| contig022362-TiITARs.A042 | contig053139-ZebTARs.A023 | 0.325 | 0.789 | 0.412 |
| contig022375-TiITARs.A048 | contig061410-ZebTARs.A021 | 0.214 | 0.519 | 0.412 |
| contig007518-TiITARs.A019 | contig059768-ZebTARs.A022 | 0.382 | 0.929 | 0.412 |
| contig049534-BurTARs.A025 | contig030445-ZebTARs.A026 | 0.257 | 0.623 | 0.412 |
| contig049540-BurTARs.A024 | contig022383-TiITARs.A054 | 0.163 | 0.397 | 0.412 |
| contig061977-BurTARs.A012 | contig046014-NyeTARs.A024 | 0.237 | 0.574 | 0.412 |
| contig057145-BurTARs.A018 | contig022383-TiITARs.A054 | 0.253 | 0.615 | 0.412 |
| contig038663-NyeTAR.A005  | contig022377-TiITARs.A050 | 0.439 | 1.067 | 0.412 |
| contig061977-BurTARs.A012 | contig062039-NyeTARs.A022 | 0.191 | 0.465 | 0.412 |
| contig056020-BurTARs.A021 | contig058002-NyeTARs.A025 | 0.345 | 0.838 | 0.412 |
| contig007520-TiITARs.A025 | contig022368-TiITARs.A047 | 0.357 | 0.867 | 0.412 |
| contig061977-BurTARs.A012 | contig022334-TiITARs.A029 | 0.230 | 0.558 | 0.412 |
| contig060707-BurTARs.A015 | contig046014-NyeTARs.A024 | 0.318 | 0.772 | 0.412 |
| contig086351-BriTARs.A021 | contig059768-ZebTARs.A022 | 0.387 | 0.940 | 0.412 |
| contig061977-BurTARs.A012 | contig022320-TiITARs.A059 | 0.238 | 0.578 | 0.412 |
| contig022378-TiITARs.A051 | contig030464-ZebTARs.A025 | 0.252 | 0.612 | 0.412 |
| contig082565-BriTARs.A022 | contig053145-ZebTARs.A028 | 0.261 | 0.634 | 0.412 |
| contig045302-BurTAR.A001  | contig022368-TiITARs.A047 | 0.431 | 1.045 | 0.412 |

|                           |                           |       |       |       |
|---------------------------|---------------------------|-------|-------|-------|
| contig029633-BriTAR.A003  | contig046011-NyeTARs.A016 | 0.501 | 1.216 | 0.412 |
| contig022354-TiITARs.A038 | contig062677-ZebTARs.A018 | 0.260 | 0.632 | 0.412 |
| contig057145-BurTARs.A018 | contig056134-TiITARs.A058 | 0.361 | 0.875 | 0.412 |
| contig038663-NyeTAR.A005  | contig007520-TiITARs.A025 | 0.440 | 1.066 | 0.412 |
| contig057301-BurTARs.A017 | contig039642-TiITAR.A004  | 0.468 | 1.136 | 0.412 |
| contig066890-ZebTARs.A014 | contig066056-ZebTARs.A017 | 0.329 | 0.797 | 0.412 |
| contig057305-BurTARs.A031 | contig007520-TiITARs.A025 | 0.256 | 0.620 | 0.412 |
| contig086337-BriTARs.A019 | contig022343-TiITARs.A033 | 0.320 | 0.776 | 0.412 |
| contig035381-NyeTARs.A015 | contig058002-NyeTARs.A025 | 0.305 | 0.740 | 0.412 |
| contig007518-TiITARs.A019 | contig045088-TiITARs.A057 | 0.285 | 0.691 | 0.412 |
| contig022324-TiITARs.A027 | contig066285-ZebTARs.A016 | 0.168 | 0.409 | 0.412 |
| contig007520-TiITARs.A025 | contig022368-TiITARs.A046 | 0.340 | 0.823 | 0.412 |
| contig061091-BurTARs.A014 | contig066056-ZebTARs.A017 | 0.327 | 0.793 | 0.412 |
| contig060707-BurTARs.A015 | contig054630-BurTARs.A023 | 0.348 | 0.844 | 0.413 |
| contig061433-BurTARs.A013 | contig030471-ZebTARs.A024 | 0.155 | 0.376 | 0.413 |
| contig046010-NyeTARs.A019 | contig022368-TiITARs.A046 | 0.145 | 0.352 | 0.413 |
| contig030445-ZebTARs.A026 | contig066330-ZebTARs.A027 | 0.257 | 0.623 | 0.413 |
| contig086351-BriTARs.A021 | contig055697-BurTARs.A022 | 0.284 | 0.689 | 0.413 |
| contig084886-BriTARs.A017 | contig062039-NyeTARs.A022 | 0.257 | 0.624 | 0.413 |
| contig061433-BurTARs.A013 | contig022356-TiITARs.A040 | 0.168 | 0.406 | 0.413 |
| contig049534-BurTARs.A025 | contig046013-NyeTARs.A021 | 0.154 | 0.373 | 0.413 |
| contig022334-TiITARs.A029 | contig022345-TiITARs.A034 | 0.116 | 0.282 | 0.413 |
| contig057145-BurTARs.A018 | contig030445-ZebTARs.A026 | 0.226 | 0.548 | 0.413 |
| contig022356-TiITARs.A040 | contig053145-ZebTARs.A028 | 0.346 | 0.838 | 0.413 |
| contig025313-BriTAR.A002  | contig066285-ZebTARs.A016 | 0.399 | 0.966 | 0.413 |
| contig084876-BriTARs.A015 | contig060105-NyeTARs.A018 | 0.323 | 0.784 | 0.413 |
| contig086344-BriTARs.A020 | contig086351-BriTARs.A021 | 0.304 | 0.737 | 0.413 |
| contig039639-TiITAR.A001  | contig022390-TiITARs.A055 | 0.458 | 1.110 | 0.413 |
| contig086351-BriTARs.A021 | contig022362-TiITARs.A042 | 0.394 | 0.953 | 0.413 |
| contig029633-BriTAR.A003  | contig066691-ZebTARs.A015 | 0.455 | 1.103 | 0.413 |
| contig061433-BurTARs.A013 | contig022354-TiITARs.A038 | 0.157 | 0.381 | 0.413 |
| contig022365-TiITARs.A045 | contig030464-ZebTARs.A025 | 0.154 | 0.372 | 0.413 |
| contig056021-BurTARs.A020 | contig022368-TiITARs.A046 | 0.137 | 0.332 | 0.413 |
| contig022343-TiITARs.A033 | contig053139-ZebTARs.A023 | 0.315 | 0.764 | 0.413 |
| contig038663-NyeTAR.A005  | contig022357-TiITARs.A041 | 0.447 | 1.082 | 0.413 |
| contig025313-BriTAR.A002  | contig061433-BurTARs.A013 | 0.415 | 1.005 | 0.413 |
| contig038663-NyeTAR.A005  | contig062676-ZebTARs.A019 | 0.418 | 1.011 | 0.413 |
| contig038663-NyeTAR.A005  | contig007524-TiITARs.A026 | 0.445 | 1.077 | 0.413 |
| contig057145-BurTARs.A018 | contig007520-TiITARs.A025 | 0.335 | 0.811 | 0.413 |
| contig066285-ZebTARs.A016 | contig059768-ZebTARs.A022 | 0.394 | 0.954 | 0.413 |
| contig055697-BurTARs.A022 | contig056200-NyeTARs.A029 | 0.334 | 0.808 | 0.413 |
| contig049534-BurTARs.A025 | contig022375-TiITARs.A048 | 0.172 | 0.416 | 0.413 |
| contig059673-BurTARs.A016 | contig060105-NyeTARs.A018 | 0.309 | 0.747 | 0.413 |
| contig022368-TiITARs.A047 | contig030464-ZebTARs.A025 | 0.151 | 0.365 | 0.413 |
| contig007520-TiITARs.A025 | contig022345-TiITARs.A034 | 0.328 | 0.793 | 0.413 |
| contig084876-BriTARs.A015 | contig062676-ZebTARs.A019 | 0.145 | 0.351 | 0.413 |
| contig007518-TiITARs.A019 | contig022353-TiITARs.A036 | 0.401 | 0.969 | 0.414 |
| contig061091-BurTARs.A014 | contig022343-TiITARs.A033 | 0.103 | 0.250 | 0.414 |
| contig054630-BurTARs.A023 | contig049540-BurTARs.A024 | 0.378 | 0.914 | 0.414 |
| contig046007-NyeTARs.A017 | contig022365-TiITARs.A045 | 0.138 | 0.333 | 0.414 |
| contig022345-TiITARs.A034 | contig022368-TiITARs.A046 | 0.129 | 0.313 | 0.414 |
| contig084886-BriTARs.A017 | contig022377-TiITARs.A050 | 0.150 | 0.362 | 0.414 |
| contig046010-NyeTARs.A019 | contig062677-ZebTARs.A018 | 0.276 | 0.668 | 0.414 |

|                           |                           |       |       |       |
|---------------------------|---------------------------|-------|-------|-------|
| contig061091-BurTARs.A014 | contig046014-NyeTARs.A024 | 0.109 | 0.263 | 0.414 |
| contig086344-BriTARs.A020 | contig046010-NyeTARs.A019 | 0.346 | 0.836 | 0.414 |
| contig003909-ZebTAR.A003  | contig066285-ZebTARs.A016 | 0.403 | 0.974 | 0.414 |
| contig022324-TiITARs.A027 | contig022357-TiITARs.A041 | 0.166 | 0.401 | 0.414 |
| contig056020-BurTARs.A021 | contig022341-TiITARs.A032 | 0.126 | 0.305 | 0.414 |
| contig020038-BurTAR.A002  | contig046011-NyeTARs.A016 | 0.450 | 1.088 | 0.414 |
| contig057145-BurTARs.A018 | contig035377-NyeTARs.A023 | 0.259 | 0.625 | 0.414 |
| contig022330-TiITARs.A028 | contig056134-TiITARs.A058 | 0.351 | 0.849 | 0.414 |
| contig022377-TiITARs.A050 | contig059768-ZebTARs.A022 | 0.365 | 0.881 | 0.414 |
| contig007520-TiITARs.A025 | contig022362-TiITARs.A042 | 0.339 | 0.818 | 0.414 |
| contig061433-BurTARs.A013 | contig056134-TiITARs.A058 | 0.378 | 0.914 | 0.414 |
| contig022357-TiITARs.A041 | contig053145-ZebTARs.A028 | 0.378 | 0.912 | 0.414 |
| contig056023-BurTARs.A019 | contig059768-ZebTARs.A022 | 0.397 | 0.958 | 0.414 |
| contig035381-NyeTARs.A015 | contig022377-TiITARs.A050 | 0.246 | 0.594 | 0.414 |
| contig022379-TiITARs.A052 | contig056134-TiITARs.A058 | 0.297 | 0.718 | 0.414 |
| contig062039-NyeTARs.A022 | contig007518-TiITARs.A019 | 0.340 | 0.821 | 0.414 |
| contig057148-BurTARs.A028 | contig007518-TiITARs.A019 | 0.373 | 0.901 | 0.414 |
| contig045088-TiITARs.A057 | contig030464-ZebTARs.A025 | 0.385 | 0.930 | 0.414 |
| contig022334-TiITARs.A030 | contig022362-TiITARs.A042 | 0.182 | 0.439 | 0.414 |
| contig086337-BriTARs.A019 | contig049540-BurTARs.A024 | 0.341 | 0.823 | 0.414 |
| contig084868-BriTARs.A014 | contig084876-BriTARs.A015 | 0.163 | 0.394 | 0.414 |
| contig084876-BriTARs.A015 | contig030464-ZebTARs.A025 | 0.265 | 0.641 | 0.414 |
| contig059766-BurTARs.A029 | contig022375-TiITARs.A048 | 0.308 | 0.742 | 0.414 |
| contig057148-BurTARs.A028 | contig022379-TiITARs.A052 | 0.245 | 0.590 | 0.414 |
| contig038663-NyeTAR.A005  | contig030471-ZebTARs.A024 | 0.463 | 1.117 | 0.414 |
| contig061433-BurTARs.A013 | contig046013-NyeTARs.A021 | 0.166 | 0.400 | 0.414 |
| contig022334-TiITARs.A029 | contig022377-TiITARs.A050 | 0.135 | 0.325 | 0.414 |
| contig060707-BurTARs.A015 | contig066890-ZebTARs.A014 | 0.328 | 0.792 | 0.414 |
| contig082565-BriTARs.A022 | contig059766-BurTARs.A029 | 0.263 | 0.635 | 0.414 |
| contig057145-BurTARs.A018 | contig022390-TiITARs.A055 | 0.242 | 0.583 | 0.414 |
| contig057301-BurTARs.A017 | contig040586-ZebTAR.A001  | 0.491 | 1.184 | 0.414 |
| contig066056-ZebTARs.A017 | contig059768-ZebTARs.A022 | 0.341 | 0.822 | 0.414 |
| contig086344-BriTARs.A020 | contig059768-ZebTARs.A022 | 0.350 | 0.844 | 0.415 |
| contig029633-BriTAR.A003  | contig062676-ZebTARs.A019 | 0.420 | 1.013 | 0.415 |
| contig086351-BriTARs.A021 | contig062039-NyeTARs.A022 | 0.362 | 0.874 | 0.415 |
| contig084886-BriTARs.A017 | contig053145-ZebTARs.A028 | 0.347 | 0.837 | 0.415 |
| contig022354-TiITARs.A038 | contig030471-ZebTARs.A024 | 0.139 | 0.335 | 0.415 |
| contig022341-TiITARs.A032 | contig062677-ZebTARs.A018 | 0.275 | 0.663 | 0.415 |
| contig007518-TiITARs.A019 | contig022320-TiITARs.A059 | 0.349 | 0.842 | 0.415 |
| contig022377-TiITARs.A050 | contig066691-ZebTARs.A015 | 0.144 | 0.346 | 0.415 |
| contig082565-BriTARs.A022 | contig058002-NyeTARs.A025 | 0.310 | 0.747 | 0.415 |
| contig057301-BurTARs.A017 | contig007518-TiITARs.A019 | 0.287 | 0.692 | 0.415 |
| contig056020-BurTARs.A021 | contig057148-BurTARs.A028 | 0.140 | 0.337 | 0.415 |
| contig060292-NyeTARs.A027 | contig007520-TiITARs.A025 | 0.254 | 0.611 | 0.415 |
| contig030471-ZebTARs.A024 | contig030464-ZebTARs.A025 | 0.156 | 0.377 | 0.415 |
| contig055697-BurTARs.A022 | contig046013-NyeTARs.A021 | 0.354 | 0.853 | 0.415 |
| contig060105-NyeTARs.A018 | contig035377-NyeTARs.A023 | 0.331 | 0.797 | 0.415 |
| contig057148-BurTARs.A028 | contig035376-NyeTARs.A014 | 0.247 | 0.596 | 0.415 |
| contig022357-TiITARs.A041 | contig056134-TiITARs.A058 | 0.380 | 0.916 | 0.415 |
| contig007512-TiITARs.A024 | contig066691-ZebTARs.A015 | 0.369 | 0.888 | 0.415 |
| contig084887-BriTARs.A018 | contig022343-TiITARs.A033 | 0.104 | 0.250 | 0.415 |
| contig066691-ZebTARs.A015 | contig053139-ZebTARs.A023 | 0.362 | 0.872 | 0.415 |
| contig022330-TiITARs.A028 | contig030471-ZebTARs.A024 | 0.119 | 0.288 | 0.415 |

|                           |                           |       |       |       |
|---------------------------|---------------------------|-------|-------|-------|
| contig086344-BriTARs.A020 | contig061433-BurTARs.A013 | 0.344 | 0.829 | 0.415 |
| contig022357-TiITARs.A041 | contig022375-TiITARs.A048 | 0.164 | 0.396 | 0.415 |
| contig086351-BriTARs.A021 | contig022383-TiITARs.A054 | 0.347 | 0.836 | 0.415 |
| contig041024-BurTARs.A026 | contig066691-ZebTARs.A015 | 0.115 | 0.278 | 0.415 |
| contig029633-BriTAR.A003  | contig030445-ZebTARs.A026 | 0.391 | 0.943 | 0.415 |
| contig039640-TiITAR.A003  | contig022390-TiITARs.A056 | 0.403 | 0.970 | 0.415 |
| contig029633-BriTAR.A003  | contig059673-BurTARs.A016 | 0.474 | 1.141 | 0.415 |
| contig061433-BurTARs.A013 | contig032272-NyeTAR.A004  | 0.423 | 1.019 | 0.415 |
| contig035381-NyeTARs.A015 | contig022341-TiITARs.A032 | 0.246 | 0.593 | 0.415 |
| contig057145-BurTARs.A018 | contig065494-BurTARs.A030 | 0.366 | 0.880 | 0.415 |
| contig022375-TiITARs.A048 | contig053145-ZebTARs.A028 | 0.308 | 0.741 | 0.415 |
| contig084880-BriTARs.A016 | contig057148-BurTARs.A028 | 0.189 | 0.456 | 0.415 |
| contig007512-TiITARs.A024 | contig022343-TiITARs.A033 | 0.345 | 0.830 | 0.415 |
| contig046007-NyeTARs.A017 | contig058002-NyeTARs.A025 | 0.349 | 0.840 | 0.415 |
| contig054630-BurTARs.A023 | contig022368-TiITARs.A046 | 0.364 | 0.877 | 0.415 |
| contig007520-TiITARs.A025 | contig066890-ZebTARs.A014 | 0.327 | 0.787 | 0.415 |
| contig038663-NyeTAR.A005  | contig066285-ZebTARs.A016 | 0.456 | 1.099 | 0.415 |
| contig054630-BurTARs.A023 | contig022353-TiITARs.A036 | 0.417 | 1.004 | 0.415 |
| contig062039-NyeTARs.A022 | contig066890-ZebTARs.A014 | 0.235 | 0.566 | 0.416 |
| contig086337-BriTARs.A019 | contig057145-BurTARs.A018 | 0.339 | 0.817 | 0.416 |
| contig038663-NyeTAR.A005  | contig039639-TiITAR.A001  | 0.064 | 0.153 | 0.416 |
| contig022334-TiITARs.A030 | contig056134-TiITARs.A058 | 0.359 | 0.863 | 0.416 |
| contig046013-NyeTARs.A021 | contig066330-ZebTARs.A027 | 0.353 | 0.850 | 0.416 |
| contig056020-BurTARs.A021 | contig022368-TiITARs.A047 | 0.139 | 0.334 | 0.416 |
| contig060707-BurTARs.A015 | contig022334-TiITARs.A029 | 0.331 | 0.797 | 0.416 |
| contig086337-BriTARs.A019 | contig022382-TiITARs.A053 | 0.333 | 0.802 | 0.416 |
| contig022368-TiITARs.A046 | contig066056-ZebTARs.A017 | 0.336 | 0.807 | 0.416 |
| contig058002-NyeTARs.A025 | contig022354-TiITARs.A038 | 0.341 | 0.820 | 0.416 |
| contig035381-NyeTARs.A015 | contig022356-TiITARs.A040 | 0.241 | 0.580 | 0.416 |
| contig042499-NyeTARs.A028 | contig030464-ZebTARs.A025 | 0.379 | 0.912 | 0.416 |
| contig061977-BurTARs.A012 | contig007524-TiITARs.A026 | 0.311 | 0.748 | 0.416 |
| contig062677-ZebTARs.A018 | contig053139-ZebTARs.A023 | 0.335 | 0.805 | 0.416 |
| contig084868-BriTARs.A014 | contig086351-BriTARs.A021 | 0.366 | 0.880 | 0.416 |
| contig061977-BurTARs.A012 | contig022368-TiITARs.A047 | 0.253 | 0.609 | 0.416 |
| contig029633-BriTAR.A003  | contig035375-NyeTARs.A013 | 0.396 | 0.953 | 0.416 |
| contig049540-BurTARs.A024 | contig007512-TiITARs.A024 | 0.339 | 0.814 | 0.416 |
| contig056200-NyeTARs.A029 | contig022383-TiITARs.A054 | 0.165 | 0.397 | 0.416 |
| contig045302-BurTAR.A001  | contig007520-TiITARs.A025 | 0.433 | 1.041 | 0.416 |
| contig022355-TiITARs.A039 | contig022368-TiITARs.A046 | 0.131 | 0.314 | 0.416 |
| contig022390-TiITARs.A055 | contig040586-ZebTAR.A002  | 0.447 | 1.074 | 0.416 |
| contig020038-BurTAR.A002  | contig066285-ZebTARs.A016 | 0.407 | 0.978 | 0.416 |
| contig060707-BurTARs.A015 | contig022330-TiITARs.A028 | 0.328 | 0.788 | 0.416 |
| contig065494-BurTARs.A030 | contig046011-NyeTARs.A016 | 0.394 | 0.946 | 0.416 |
| contig007518-TiITARs.A019 | contig022390-TiITARs.A055 | 0.311 | 0.747 | 0.417 |
| contig046014-NyeTARs.A024 | contig022337-TiITARs.A031 | 0.139 | 0.333 | 0.417 |
| contig022383-TiITARs.A054 | contig040586-ZebTAR.A001  | 0.409 | 0.981 | 0.417 |
| contig086344-BriTARs.A020 | contig046014-NyeTARs.A024 | 0.326 | 0.783 | 0.417 |
| contig086351-BriTARs.A021 | contig060105-NyeTARs.A018 | 0.297 | 0.713 | 0.417 |
| contig057145-BurTARs.A018 | contig046010-NyeTARs.A019 | 0.144 | 0.346 | 0.417 |
| contig022334-TiITARs.A029 | contig022368-TiITARs.A046 | 0.132 | 0.316 | 0.417 |
| contig022356-TiITARs.A040 | contig030464-ZebTARs.A025 | 0.135 | 0.324 | 0.417 |
| contig062039-NyeTARs.A022 | contig022341-TiITARs.A032 | 0.235 | 0.565 | 0.417 |
| contig058002-NyeTARs.A025 | contig022330-TiITARs.A028 | 0.329 | 0.790 | 0.417 |



|                           |                           |       |       |       |
|---------------------------|---------------------------|-------|-------|-------|
| contig035377-NyeTARs.A023 | contig022345-TiITARs.A034 | 0.259 | 0.621 | 0.417 |
| contig045999-NyeTARs.A026 | contig039639-TiITAR.A001  | 0.450 | 1.079 | 0.417 |
| contig084868-BriTARs.A014 | contig057145-BurTARs.A018 | 0.263 | 0.631 | 0.417 |
| contig038663-NyeTAR.A005  | contig022375-TiITARs.A048 | 0.407 | 0.976 | 0.417 |
| contig066285-ZebTARs.A016 | contig030445-ZebTARs.A026 | 0.257 | 0.616 | 0.417 |
| contig022368-TiITARs.A046 | contig045088-TiITARs.A057 | 0.367 | 0.880 | 0.417 |
| contig084868-BriTARs.A014 | contig022354-TiITARs.A038 | 0.259 | 0.621 | 0.417 |
| contig007518-TiITARs.A019 | contig022355-TiITARs.A039 | 0.383 | 0.918 | 0.417 |
| contig062039-NyeTARs.A022 | contig022334-TiITARs.A030 | 0.237 | 0.569 | 0.417 |
| contig062039-NyeTARs.A022 | contig022382-TiITARs.A053 | 0.248 | 0.595 | 0.417 |
| contig084876-BriTARs.A015 | contig045302-BurTAR.A001  | 0.410 | 0.982 | 0.417 |
| contig022375-TiITARs.A048 | contig022383-TiITARs.A054 | 0.225 | 0.539 | 0.417 |
| contig060707-BurTARs.A015 | contig059768-ZebTARs.A022 | 0.342 | 0.819 | 0.417 |
| contig059766-BurTARs.A029 | contig022356-TiITARs.A040 | 0.350 | 0.839 | 0.417 |
| contig084886-BriTARs.A017 | contig066330-ZebTARs.A027 | 0.351 | 0.841 | 0.417 |
| contig049540-BurTARs.A024 | contig022354-TiITARs.A038 | 0.262 | 0.629 | 0.417 |
| contig022354-TiITARs.A038 | contig053145-ZebTARs.A028 | 0.339 | 0.812 | 0.417 |
| contig061091-BurTARs.A014 | contig055697-BurTARs.A022 | 0.363 | 0.870 | 0.418 |
| contig022349-TiITARs.A035 | contig022354-TiITARs.A038 | 0.141 | 0.339 | 0.418 |
| contig066285-ZebTARs.A016 | contig062677-ZebTARs.A018 | 0.292 | 0.700 | 0.418 |
| contig022341-TiITARs.A032 | contig022343-TiITARs.A033 | 0.137 | 0.328 | 0.418 |
| contig061433-BurTARs.A013 | contig022337-TiITARs.A031 | 0.167 | 0.400 | 0.418 |
| contig007518-TiITARs.A019 | contig056134-TiITARs.A058 | 0.320 | 0.766 | 0.418 |
| contig046007-NyeTARs.A017 | contig022334-TiITARs.A029 | 0.124 | 0.296 | 0.418 |
| contig034854-BurTARs.A027 | contig022334-TiITARs.A030 | 0.244 | 0.585 | 0.418 |
| contig060707-BurTARs.A015 | contig022375-TiITARs.A048 | 0.334 | 0.799 | 0.418 |
| contig060105-NyeTARs.A018 | contig046014-NyeTARs.A024 | 0.319 | 0.764 | 0.418 |
| contig057148-BurTARs.A028 | contig030445-ZebTARs.A026 | 0.242 | 0.578 | 0.418 |
| contig045302-BurTAR.A001  | contig059673-BurTARs.A016 | 0.458 | 1.096 | 0.418 |
| contig038663-NyeTAR.A005  | contig061410-ZebTARs.A021 | 0.406 | 0.971 | 0.418 |
| contig046010-NyeTARs.A019 | contig022334-TiITARs.A030 | 0.188 | 0.451 | 0.418 |
| contig054630-BurTARs.A023 | contig046013-NyeTARs.A021 | 0.387 | 0.925 | 0.418 |
| contig022356-TiITARs.A040 | contig022375-TiITARs.A048 | 0.136 | 0.326 | 0.418 |
| contig086337-BriTARs.A019 | contig062677-ZebTARs.A018 | 0.342 | 0.817 | 0.418 |
| contig084876-BriTARs.A015 | contig066330-ZebTARs.A027 | 0.286 | 0.683 | 0.418 |
| contig057148-BurTARs.A028 | contig022334-TiITARs.A030 | 0.185 | 0.442 | 0.418 |
| contig059766-BurTARs.A029 | contig022357-TiITARs.A041 | 0.382 | 0.914 | 0.418 |
| contig035381-NyeTARs.A015 | contig022354-TiITARs.A038 | 0.243 | 0.581 | 0.418 |
| contig022375-TiITARs.A048 | contig066330-ZebTARs.A027 | 0.322 | 0.770 | 0.418 |
| contig038663-NyeTAR.A005  | contig045999-NyeTARs.A026 | 0.452 | 1.081 | 0.418 |
| contig056021-BurTARs.A020 | contig022375-TiITARs.A048 | 0.148 | 0.354 | 0.418 |
| contig029633-BriTAR.A003  | contig022357-TiITARs.A041 | 0.449 | 1.073 | 0.418 |
| contig086337-BriTARs.A019 | contig066691-ZebTARs.A015 | 0.365 | 0.872 | 0.418 |
| contig084886-BriTARs.A017 | contig086344-BriTARs.A020 | 0.334 | 0.798 | 0.418 |
| contig084887-BriTARs.A018 | contig057148-BurTARs.A028 | 0.150 | 0.359 | 0.418 |
| contig049540-BurTARs.A024 | contig059768-ZebTARs.A022 | 0.371 | 0.887 | 0.418 |
| contig022354-TiITARs.A038 | contig030440-ZebTARs.A029 | 0.249 | 0.596 | 0.418 |
| contig022320-TiITARs.A059 | contig066691-ZebTARs.A015 | 0.125 | 0.298 | 0.419 |
| contig046010-NyeTARs.A019 | contig007520-TiITARs.A025 | 0.348 | 0.831 | 0.419 |
| contig022345-TiITARs.A034 | contig066691-ZebTARs.A015 | 0.136 | 0.326 | 0.419 |
| contig022357-TiITARs.A041 | contig022390-TiITARs.A055 | 0.242 | 0.579 | 0.419 |
| contig042499-NyeTARs.A028 | contig022368-TiITARs.A046 | 0.365 | 0.873 | 0.419 |
| contig057148-BurTARs.A028 | contig030440-ZebTARs.A029 | 0.260 | 0.622 | 0.419 |

|                           |                           |       |       |       |
|---------------------------|---------------------------|-------|-------|-------|
| contig022379-TiITARs.A052 | contig053145-ZebTARs.A028 | 0.276 | 0.660 | 0.419 |
| contig007520-TiITARs.A025 | contig030445-ZebTARs.A026 | 0.304 | 0.727 | 0.419 |
| contig034854-BurTARs.A027 | contig056134-TiITARs.A058 | 0.293 | 0.701 | 0.419 |
| contig039639-TiITAR.A001  | contig040586-ZebTAR.A001  | 0.060 | 0.144 | 0.419 |
| contig022375-TiITARs.A048 | contig061417-ZebTARs.A020 | 0.146 | 0.349 | 0.419 |
| contig007512-TiITARs.A024 | contig022379-TiITARs.A052 | 0.287 | 0.685 | 0.419 |
| contig084887-BriTARs.A018 | contig060707-BurTARs.A015 | 0.329 | 0.785 | 0.419 |
| contig084886-BriTARs.A017 | contig059766-BurTARs.A029 | 0.351 | 0.839 | 0.419 |
| contig022363-TiITARs.A043 | contig022377-TiITARs.A050 | 0.188 | 0.449 | 0.419 |
| contig045088-TiITARs.A057 | contig066285-ZebTARs.A016 | 0.384 | 0.917 | 0.419 |
| contig066330-ZebTARs.A027 | contig030440-ZebTARs.A029 | 0.281 | 0.670 | 0.419 |
| contig086344-BriTARs.A020 | contig066890-ZebTARs.A014 | 0.332 | 0.792 | 0.419 |
| contig007512-TiITARs.A024 | contig022357-TiITARs.A041 | 0.376 | 0.897 | 0.419 |
| contig046011-NyeTARs.A016 | contig039642-TiITAR.A004  | 0.504 | 1.203 | 0.419 |
| contig022368-TiITARs.A047 | contig059768-ZebTARs.A022 | 0.351 | 0.837 | 0.419 |
| contig046013-NyeTARs.A021 | contig022324-TiITARs.A027 | 0.166 | 0.395 | 0.419 |
| contig022354-TiITARs.A037 | contig022375-TiITARs.A048 | 0.113 | 0.269 | 0.419 |
| contig056021-BurTARs.A020 | contig022363-TiITARs.A043 | 0.158 | 0.376 | 0.419 |
| contig045302-BurTAR.A001  | contig035375-NyeTARs.A013 | 0.395 | 0.943 | 0.419 |
| contig035377-NyeTARs.A023 | contig039642-TiITAR.A004  | 0.413 | 0.984 | 0.419 |
| contig054630-BurTARs.A023 | contig066285-ZebTARs.A016 | 0.401 | 0.956 | 0.419 |
| contig022355-TiITARs.A039 | contig066056-ZebTARs.A017 | 0.327 | 0.779 | 0.420 |
| contig057301-BurTARs.A017 | contig038663-NyeTAR.A005  | 0.498 | 1.188 | 0.420 |
| contig061977-BurTARs.A012 | contig035377-NyeTARs.A023 | 0.154 | 0.367 | 0.420 |
| contig056134-TiITARs.A058 | contig066691-ZebTARs.A015 | 0.360 | 0.857 | 0.420 |
| contig049534-BurTARs.A025 | contig022368-TiITARs.A047 | 0.153 | 0.365 | 0.420 |
| contig022377-TiITARs.A050 | contig066056-ZebTARs.A017 | 0.310 | 0.738 | 0.420 |
| contig061977-BurTARs.A012 | contig030471-ZebTARs.A024 | 0.255 | 0.607 | 0.420 |
| contig046010-NyeTARs.A019 | contig022382-TiITARs.A053 | 0.273 | 0.651 | 0.420 |
| contig029633-BriTAR.A003  | contig082565-BriTARs.A022 | 0.394 | 0.939 | 0.420 |
| contig022330-TiITARs.A028 | contig022345-TiITARs.A034 | 0.118 | 0.281 | 0.420 |
| contig084886-BriTARs.A017 | contig065494-BurTARs.A030 | 0.353 | 0.841 | 0.420 |
| contig084868-BriTARs.A014 | contig030464-ZebTARs.A025 | 0.274 | 0.651 | 0.420 |
| contig061091-BurTARs.A014 | contig041024-BurTARs.A026 | 0.112 | 0.267 | 0.420 |
| contig066691-ZebTARs.A015 | contig066056-ZebTARs.A017 | 0.329 | 0.784 | 0.420 |
| contig056021-BurTARs.A020 | contig038663-NyeTAR.A005  | 0.435 | 1.035 | 0.420 |
| contig058002-NyeTARs.A025 | contig022390-TiITARs.A055 | 0.299 | 0.711 | 0.420 |
| contig086337-BriTARs.A019 | contig022356-TiITARs.A040 | 0.334 | 0.796 | 0.420 |
| contig034854-BurTARs.A027 | contig062039-NyeTARs.A022 | 0.234 | 0.556 | 0.420 |
| contig058002-NyeTARs.A025 | contig022377-TiITARs.A050 | 0.343 | 0.816 | 0.420 |
| contig056020-BurTARs.A021 | contig022365-TiITARs.A045 | 0.137 | 0.327 | 0.420 |
| contig046014-NyeTARs.A024 | contig022343-TiITARs.A033 | 0.125 | 0.299 | 0.420 |
| contig082565-BriTARs.A022 | contig065494-BurTARs.A030 | 0.266 | 0.633 | 0.420 |
| contig082565-BriTARs.A022 | contig022345-TiITARs.A034 | 0.245 | 0.582 | 0.420 |
| contig022354-TiITARs.A037 | contig030471-ZebTARs.A024 | 0.170 | 0.403 | 0.420 |
| contig045302-BurTAR.A001  | contig045999-NyeTARs.A026 | 0.458 | 1.090 | 0.420 |
| contig061091-BurTARs.A014 | contig060707-BurTARs.A015 | 0.340 | 0.809 | 0.420 |
| contig057145-BurTARs.A018 | contig030471-ZebTARs.A024 | 0.127 | 0.302 | 0.420 |
| contig054630-BurTARs.A023 | contig022368-TiITARs.A047 | 0.353 | 0.839 | 0.421 |
| contig060105-NyeTARs.A018 | contig022324-TiITARs.A027 | 0.341 | 0.811 | 0.421 |
| contig057148-BurTARs.A028 | contig022353-TiITARs.A036 | 0.162 | 0.385 | 0.421 |
| contig061977-BurTARs.A012 | contig066285-ZebTARs.A016 | 0.257 | 0.611 | 0.421 |
| contig023443-TiITAR.A005  | contig045088-TiITARs.A057 | 0.398 | 0.947 | 0.421 |

|                           |                           |       |       |       |
|---------------------------|---------------------------|-------|-------|-------|
| contig057145-BurTARs.A018 | contig022354-TiITARs.A038 | 0.131 | 0.311 | 0.421 |
| contig046010-NyeTARs.A019 | contig056200-NyeTARs.A029 | 0.275 | 0.654 | 0.421 |
| contig057145-BurTARs.A018 | contig007524-TiITARs.A026 | 0.344 | 0.818 | 0.421 |
| contig022330-TiITARs.A028 | contig061410-ZebTARs.A021 | 0.233 | 0.553 | 0.421 |
| contig056020-BurTARs.A021 | contig022375-TiITARs.A048 | 0.148 | 0.351 | 0.421 |
| contig046010-NyeTARs.A019 | contig022353-TiITARs.A036 | 0.160 | 0.380 | 0.421 |
| contig035376-NyeTARs.A014 | contig053145-ZebTARs.A028 | 0.269 | 0.639 | 0.421 |
| contig022368-TiITARs.A046 | contig066285-ZebTARs.A016 | 0.169 | 0.401 | 0.421 |
| contig022375-TiITARs.A048 | contig022377-TiITARs.A050 | 0.162 | 0.384 | 0.421 |
| contig061977-BurTARs.A012 | contig056021-BurTARs.A020 | 0.234 | 0.556 | 0.421 |
| contig007520-TiITARs.A025 | contig022378-TiITARs.A051 | 0.339 | 0.805 | 0.421 |
| contig022345-TiITARs.A034 | contig022368-TiITARs.A047 | 0.128 | 0.303 | 0.421 |
| contig059673-BurTARs.A016 | contig038663-NyeTAR.A005  | 0.465 | 1.104 | 0.421 |
| contig022355-TiITARs.A039 | contig022368-TiITARs.A047 | 0.134 | 0.319 | 0.421 |
| contig035376-NyeTARs.A014 | contig066330-ZebTARs.A027 | 0.272 | 0.646 | 0.421 |
| contig060707-BurTARs.A015 | contig022334-TiITARs.A030 | 0.350 | 0.832 | 0.421 |
| contig035375-NyeTARs.A013 | contig062039-NyeTARs.A022 | 0.236 | 0.559 | 0.421 |
| contig049534-BurTARs.A025 | contig022362-TiITARs.A042 | 0.180 | 0.427 | 0.421 |
| contig084876-BriTARs.A015 | contig057145-BurTARs.A018 | 0.252 | 0.599 | 0.421 |
| contig086351-BriTARs.A021 | contig057148-BurTARs.A028 | 0.415 | 0.985 | 0.421 |
| contig035375-NyeTARs.A013 | contig040586-ZebTAR.A001  | 0.399 | 0.948 | 0.421 |
| contig084868-BriTARs.A014 | contig022320-TiITARs.A059 | 0.256 | 0.608 | 0.421 |
| contig065494-BurTARs.A030 | contig030440-ZebTARs.A029 | 0.284 | 0.674 | 0.421 |
| contig061977-BurTARs.A012 | contig030445-ZebTARs.A026 | 0.122 | 0.290 | 0.422 |
| contig022343-TiITARs.A033 | contig066691-ZebTARs.A015 | 0.103 | 0.245 | 0.422 |
| contig029633-BriTAR.A003  | contig061417-ZebTARs.A020 | 0.435 | 1.032 | 0.422 |
| contig046010-NyeTARs.A019 | contig053145-ZebTARs.A028 | 0.348 | 0.826 | 0.422 |
| contig061091-BurTARs.A014 | contig053139-ZebTARs.A023 | 0.362 | 0.859 | 0.422 |
| contig058002-NyeTARs.A025 | contig022345-TiITARs.A034 | 0.326 | 0.774 | 0.422 |
| contig035377-NyeTARs.A023 | contig022349-TiITARs.A035 | 0.277 | 0.657 | 0.422 |
| contig046014-NyeTARs.A024 | contig061410-ZebTARs.A021 | 0.239 | 0.566 | 0.422 |
| contig061433-BurTARs.A013 | contig022330-TiITARs.A028 | 0.158 | 0.374 | 0.422 |
| contig049540-BurTARs.A024 | contig022341-TiITARs.A032 | 0.274 | 0.649 | 0.422 |
| contig007520-TiITARs.A025 | contig022357-TiITARs.A041 | 0.379 | 0.898 | 0.422 |
| contig022354-TiITARs.A038 | contig066330-ZebTARs.A027 | 0.343 | 0.814 | 0.422 |
| contig035376-NyeTARs.A014 | contig022363-TiITARs.A043 | 0.270 | 0.640 | 0.422 |
| contig057148-BurTARs.A028 | contig022382-TiITARs.A053 | 0.271 | 0.643 | 0.422 |
| contig057148-BurTARs.A028 | contig062677-ZebTARs.A018 | 0.278 | 0.659 | 0.422 |
| contig066056-ZebTARs.A017 | contig030471-ZebTARs.A024 | 0.331 | 0.784 | 0.422 |
| contig059673-BurTARs.A016 | contig061410-ZebTARs.A021 | 0.321 | 0.760 | 0.422 |
| contig049534-BurTARs.A025 | contig038663-NyeTAR.A005  | 0.462 | 1.094 | 0.422 |
| contig022320-TiITARs.A059 | contig061410-ZebTARs.A021 | 0.240 | 0.570 | 0.422 |
| contig065494-BurTARs.A030 | contig022362-TiITARs.A042 | 0.336 | 0.795 | 0.422 |
| contig065494-BurTARs.A030 | contig022349-TiITARs.A035 | 0.344 | 0.816 | 0.422 |
| contig056200-NyeTARs.A029 | contig053139-ZebTARs.A023 | 0.335 | 0.793 | 0.422 |
| contig065494-BurTARs.A030 | contig035376-NyeTARs.A014 | 0.273 | 0.647 | 0.422 |
| contig035377-NyeTARs.A023 | contig040586-ZebTAR.A002  | 0.421 | 0.997 | 0.422 |
| contig058002-NyeTARs.A025 | contig022390-TiITARs.A056 | 0.327 | 0.773 | 0.422 |
| contig055697-BurTARs.A022 | contig022357-TiITARs.A041 | 0.375 | 0.888 | 0.422 |
| contig056134-TiITARs.A058 | contig061417-ZebTARs.A020 | 0.358 | 0.848 | 0.422 |
| contig049534-BurTARs.A025 | contig022383-TiITARs.A054 | 0.270 | 0.638 | 0.422 |
| contig056021-BurTARs.A020 | contig022354-TiITARs.A037 | 0.161 | 0.382 | 0.422 |
| contig084886-BriTARs.A017 | contig061433-BurTARs.A013 | 0.164 | 0.389 | 0.422 |

|                           |                           |       |       |       |
|---------------------------|---------------------------|-------|-------|-------|
| contig038663-NyeTARs.A005 | contig061417-ZebTARs.A020 | 0.435 | 1.030 | 0.422 |
| contig084876-BriTARs.A015 | contig040586-ZebTAR.A001  | 0.415 | 0.983 | 0.422 |
| contig046007-NyeTARs.A017 | contig022341-TiITARs.A032 | 0.130 | 0.308 | 0.422 |
| contig061977-BurTARs.A012 | contig049534-BurTARs.A025 | 0.257 | 0.608 | 0.423 |
| contig057305-BurTARs.A031 | contig053139-ZebTARs.A023 | 0.288 | 0.681 | 0.423 |
| contig084876-BriTARs.A015 | contig022375-TiITARs.A048 | 0.220 | 0.521 | 0.423 |
| contig061433-BurTARs.A013 | contig022343-TiITARs.A033 | 0.164 | 0.387 | 0.423 |
| contig057145-BurTARs.A018 | contig066330-ZebTARs.A027 | 0.370 | 0.875 | 0.423 |
| contig086337-BriTARs.A019 | contig086351-BriTARs.A021 | 0.284 | 0.671 | 0.423 |
| contig007518-TiITARs.A019 | contig066056-ZebTARs.A017 | 0.319 | 0.754 | 0.423 |
| contig057145-BurTARs.A018 | contig030440-ZebTARs.A029 | 0.266 | 0.630 | 0.423 |
| contig042499-NyeTARs.A028 | contig039642-TiITAR.A004  | 0.468 | 1.106 | 0.423 |
| contig084868-BriTARs.A014 | contig057305-BurTARs.A031 | 0.351 | 0.830 | 0.423 |
| contig057145-BurTARs.A018 | contig062039-NyeTARs.A022 | 0.261 | 0.617 | 0.423 |
| contig084880-BriTARs.A016 | contig039642-TiITAR.A004  | 0.467 | 1.104 | 0.423 |
| contig029633-BriTAR.A003  | contig030440-ZebTARs.A029 | 0.398 | 0.941 | 0.423 |
| contig022354-TiITARs.A038 | contig022382-TiITARs.A053 | 0.254 | 0.600 | 0.423 |
| contig042499-NyeTARs.A028 | contig007518-TiITARs.A019 | 0.293 | 0.694 | 0.423 |
| contig035376-NyeTARs.A014 | contig007520-TiITARs.A025 | 0.311 | 0.736 | 0.423 |
| contig061977-BurTARs.A012 | contig035381-NyeTARs.A015 | 0.127 | 0.301 | 0.423 |
| contig084886-BriTARs.A017 | contig056021-BurTARs.A020 | 0.135 | 0.319 | 0.423 |
| contig035376-NyeTARs.A014 | contig022345-TiITARs.A034 | 0.244 | 0.577 | 0.423 |
| contig066056-ZebTARs.A017 | contig030440-ZebTARs.A029 | 0.329 | 0.777 | 0.423 |
| contig086344-BriTARs.A020 | contig022354-TiITARs.A038 | 0.336 | 0.794 | 0.423 |
| contig046013-NyeTARs.A021 | contig022345-TiITARs.A034 | 0.141 | 0.333 | 0.423 |
| contig046013-NyeTARs.A021 | contig059768-ZebTARs.A022 | 0.380 | 0.898 | 0.423 |
| contig056023-BurTARs.A019 | contig039639-TiITAR.A001  | 0.450 | 1.063 | 0.423 |
| contig060707-BurTARs.A015 | contig030440-ZebTARs.A029 | 0.329 | 0.778 | 0.423 |
| contig059766-BurTARs.A029 | contig035376-NyeTARs.A014 | 0.271 | 0.640 | 0.423 |
| contig022341-TiITARs.A032 | contig062676-ZebTARs.A019 | 0.247 | 0.583 | 0.423 |
| contig029633-BriTAR.A003  | contig030471-ZebTARs.A024 | 0.460 | 1.087 | 0.423 |
| contig045302-BurTAR.A001  | contig045088-TiITARs.A057 | 0.480 | 1.134 | 0.423 |
| contig058002-NyeTARs.A025 | contig030445-ZebTARs.A026 | 0.301 | 0.710 | 0.424 |
| contig084886-BriTARs.A017 | contig058002-NyeTARs.A025 | 0.345 | 0.814 | 0.424 |
| contig084868-BriTARs.A014 | contig022362-TiITARs.A042 | 0.275 | 0.650 | 0.424 |
| contig084887-BriTARs.A018 | contig086344-BriTARs.A020 | 0.338 | 0.797 | 0.424 |
| contig084887-BriTARs.A018 | contig022341-TiITARs.A032 | 0.131 | 0.310 | 0.424 |
| contig057301-BurTARs.A017 | contig023443-TiITAR.A005  | 0.404 | 0.953 | 0.424 |
| contig049534-BurTARs.A025 | contig058002-NyeTARs.A025 | 0.360 | 0.849 | 0.424 |
| contig045302-BurTAR.A001  | contig030445-ZebTARs.A026 | 0.384 | 0.905 | 0.424 |
| contig049534-BurTARs.A025 | contig022334-TiITARs.A030 | 0.224 | 0.527 | 0.424 |
| contig054630-BurTARs.A023 | contig060105-NyeTARs.A018 | 0.354 | 0.835 | 0.424 |
| contig035377-NyeTARs.A023 | contig022356-TiITARs.A040 | 0.258 | 0.609 | 0.424 |
| contig007512-TiITARs.A024 | contig062677-ZebTARs.A018 | 0.336 | 0.792 | 0.424 |
| contig059766-BurTARs.A029 | contig007518-TiITARs.A019 | 0.295 | 0.696 | 0.424 |
| contig059766-BurTARs.A029 | contig022379-TiITARs.A052 | 0.280 | 0.661 | 0.424 |
| contig022362-TiITARs.A042 | contig066330-ZebTARs.A027 | 0.335 | 0.791 | 0.424 |
| contig086337-BriTARs.A019 | contig057305-BurTARs.A031 | 0.291 | 0.686 | 0.424 |
| contig084876-BriTARs.A015 | contig022356-TiITARs.A040 | 0.254 | 0.598 | 0.424 |
| contig086337-BriTARs.A019 | contig056200-NyeTARs.A029 | 0.342 | 0.806 | 0.424 |
| contig022349-TiITARs.A035 | contig066330-ZebTARs.A027 | 0.344 | 0.811 | 0.424 |
| contig084886-BriTARs.A017 | contig007520-TiITARs.A025 | 0.346 | 0.815 | 0.424 |
| contig007520-TiITARs.A025 | contig022337-TiITARs.A031 | 0.355 | 0.837 | 0.424 |

|                           |                           |       |       |       |
|---------------------------|---------------------------|-------|-------|-------|
| contig057148-BurTARs.A028 | contig022390-TiITARs.A056 | 0.264 | 0.622 | 0.424 |
| contig046007-NyeTARs.A017 | contig022368-TiITARs.A047 | 0.144 | 0.340 | 0.424 |
| contig022330-TiITARs.A028 | contig061417-ZebTARs.A020 | 0.039 | 0.091 | 0.424 |
| contig057145-BurTARs.A018 | contig058002-NyeTARs.A025 | 0.341 | 0.803 | 0.424 |
| contig059673-BurTARs.A016 | contig060292-NyeTARs.A027 | 0.269 | 0.635 | 0.424 |
| contig020038-BurTAR.A002  | contig061433-BurTARs.A013 | 0.428 | 1.008 | 0.424 |
| contig065494-BurTARs.A030 | contig022343-TiITARs.A033 | 0.347 | 0.818 | 0.424 |
| contig065494-BurTARs.A030 | contig022356-TiITARs.A040 | 0.358 | 0.844 | 0.424 |
| contig035377-NyeTARs.A023 | contig022337-TiITARs.A031 | 0.273 | 0.644 | 0.425 |
| contig084887-BriTARs.A018 | contig022355-TiITARs.A039 | 0.083 | 0.195 | 0.425 |
| contig022353-TiITARs.A036 | contig061417-ZebTARs.A020 | 0.114 | 0.269 | 0.425 |
| contig046010-NyeTARs.A019 | contig022379-TiITARs.A052 | 0.248 | 0.585 | 0.425 |
| contig059673-BurTARs.A016 | contig022362-TiITARs.A042 | 0.356 | 0.838 | 0.425 |
| contig084887-BriTARs.A018 | contig046007-NyeTARs.A017 | 0.087 | 0.204 | 0.425 |
| contig056021-BurTARs.A020 | contig062677-ZebTARs.A018 | 0.264 | 0.622 | 0.425 |
| contig029633-BriTAR.A003  | contig056021-BurTARs.A020 | 0.438 | 1.032 | 0.425 |
| contig049540-BurTARs.A024 | contig022382-TiITARs.A053 | 0.014 | 0.034 | 0.425 |
| contig086351-BriTARs.A021 | contig022368-TiITARs.A046 | 0.401 | 0.943 | 0.425 |
| contig022337-TiITARs.A031 | contig022345-TiITARs.A034 | 0.146 | 0.344 | 0.425 |
| contig046007-NyeTARs.A017 | contig022330-TiITARs.A028 | 0.126 | 0.295 | 0.425 |
| contig022368-TiITARs.A046 | contig030464-ZebTARs.A025 | 0.151 | 0.355 | 0.425 |
| contig086344-BriTARs.A020 | contig061091-BurTARs.A014 | 0.349 | 0.821 | 0.425 |
| contig040586-ZebTAR.A001  | contig030445-ZebTARs.A026 | 0.389 | 0.916 | 0.425 |
| contig035377-NyeTARs.A023 | contig022365-TiITARs.A045 | 0.275 | 0.646 | 0.425 |
| contig062039-NyeTARs.A022 | contig007520-TiITARs.A025 | 0.330 | 0.775 | 0.425 |
| contig086344-BriTARs.A020 | contig022354-TiITARs.A037 | 0.345 | 0.812 | 0.425 |
| contig022363-TiITARs.A043 | contig062676-ZebTARs.A019 | 0.275 | 0.647 | 0.425 |
| contig022345-TiITARs.A034 | contig022390-TiITARs.A056 | 0.255 | 0.599 | 0.425 |
| contig022324-TiITARs.A027 | contig022375-TiITARs.A048 | 0.186 | 0.438 | 0.425 |
| contig086337-BriTARs.A019 | contig061091-BurTARs.A014 | 0.365 | 0.858 | 0.425 |
| contig007524-TiITARs.A026 | contig022343-TiITARs.A033 | 0.339 | 0.797 | 0.425 |
| contig062039-NyeTARs.A022 | contig030440-ZebTARs.A029 | 0.242 | 0.568 | 0.425 |
| contig035377-NyeTARs.A023 | contig066285-ZebTARs.A016 | 0.271 | 0.636 | 0.425 |
| contig060292-NyeTARs.A027 | contig053139-ZebTARs.A023 | 0.285 | 0.671 | 0.425 |
| contig060707-BurTARs.A015 | contig046013-NyeTARs.A021 | 0.341 | 0.802 | 0.425 |
| contig029633-BriTAR.A003  | contig035376-NyeTARs.A014 | 0.405 | 0.952 | 0.425 |
| contig022343-TiITARs.A033 | contig066285-ZebTARs.A016 | 0.146 | 0.342 | 0.425 |
| contig034854-BurTARs.A027 | contig053145-ZebTARs.A028 | 0.286 | 0.673 | 0.426 |
| contig022334-TiITARs.A030 | contig022382-TiITARs.A053 | 0.233 | 0.547 | 0.426 |
| contig007518-TiITARs.A019 | contig022324-TiITARs.A027 | 0.377 | 0.887 | 0.426 |
| contig082565-BriTARs.A022 | contig066330-ZebTARs.A027 | 0.268 | 0.629 | 0.426 |
| contig022341-TiITARs.A032 | contig022363-TiITARs.A044 | 0.157 | 0.369 | 0.426 |
| contig046013-NyeTARs.A021 | contig053139-ZebTARs.A023 | 0.358 | 0.841 | 0.426 |
| contig084876-BriTARs.A015 | contig007512-TiITARs.A024 | 0.297 | 0.697 | 0.426 |
| contig057145-BurTARs.A018 | contig022379-TiITARs.A052 | 0.242 | 0.569 | 0.426 |
| contig046010-NyeTARs.A019 | contig066330-ZebTARs.A027 | 0.352 | 0.827 | 0.426 |
| contig059673-BurTARs.A016 | contig022343-TiITARs.A033 | 0.350 | 0.822 | 0.426 |
| contig007520-TiITARs.A025 | contig022390-TiITARs.A056 | 0.327 | 0.767 | 0.426 |
| contig022368-TiITARs.A047 | contig061410-ZebTARs.A021 | 0.256 | 0.600 | 0.426 |
| contig022368-TiITARs.A046 | contig022383-TiITARs.A054 | 0.262 | 0.614 | 0.426 |
| contig022357-TiITARs.A041 | contig053139-ZebTARs.A023 | 0.379 | 0.889 | 0.426 |
| contig022334-TiITARs.A029 | contig056134-TiITARs.A058 | 0.355 | 0.833 | 0.426 |
| contig022362-TiITARs.A042 | contig030464-ZebTARs.A025 | 0.165 | 0.388 | 0.426 |

|                           |                           |       |       |       |
|---------------------------|---------------------------|-------|-------|-------|
| contig059766-BurTARs.A029 | contig022390-TiITARs.A055 | 0.275 | 0.646 | 0.426 |
| contig065494-BurTARs.A030 | contig022390-TiITARs.A055 | 0.275 | 0.646 | 0.426 |
| contig056021-BurTARs.A020 | contig049540-BurTARs.A024 | 0.263 | 0.617 | 0.426 |
| contig082565-BriTARs.A022 | contig049534-BurTARs.A025 | 0.268 | 0.628 | 0.426 |
| contig056023-BurTARs.A019 | contig046010-NyeTARs.A019 | 0.186 | 0.435 | 0.426 |
| contig084876-BriTARs.A015 | contig022354-TiITARs.A038 | 0.251 | 0.588 | 0.426 |
| contig058002-NyeTARs.A025 | contig022334-TiITARs.A029 | 0.329 | 0.772 | 0.426 |
| contig084868-BriTARs.A014 | contig022324-TiITARs.A027 | 0.278 | 0.652 | 0.426 |
| contig034854-BurTARs.A027 | contig066056-ZebTARs.A017 | 0.338 | 0.794 | 0.426 |
| contig062039-NyeTARs.A022 | contig061410-ZebTARs.A021 | 0.195 | 0.458 | 0.426 |
| contig084886-BriTARs.A017 | contig022330-TiITARs.A028 | 0.132 | 0.311 | 0.426 |
| contig046010-NyeTARs.A019 | contig058002-NyeTARs.A025 | 0.349 | 0.820 | 0.426 |
| contig056200-NyeTARs.A029 | contig022354-TiITARs.A038 | 0.264 | 0.620 | 0.426 |
| contig060707-BurTARs.A015 | contig034854-BurTARs.A027 | 0.339 | 0.795 | 0.426 |
| contig025313-BriTAR.A002  | contig003909-ZebTAR.A003  | 0.011 | 0.026 | 0.426 |
| contig022363-TiITARs.A044 | contig066056-ZebTARs.A017 | 0.339 | 0.795 | 0.426 |
| contig061091-BurTARs.A014 | contig056134-TiITARs.A058 | 0.360 | 0.844 | 0.427 |
| contig056020-BurTARs.A021 | contig066691-ZebTARs.A015 | 0.083 | 0.194 | 0.427 |
| contig007518-TiITARs.A019 | contig040586-ZebTAR.A001  | 0.484 | 1.136 | 0.427 |
| contig022334-TiITARs.A029 | contig061410-ZebTARs.A021 | 0.233 | 0.546 | 0.427 |
| contig022334-TiITARs.A029 | contig066285-ZebTARs.A016 | 0.149 | 0.350 | 0.427 |
| contig084880-BriTARs.A016 | contig040586-ZebTAR.A002  | 0.470 | 1.102 | 0.427 |
| contig039642-TiITAR.A004  | contig022390-TiITARs.A056 | 0.406 | 0.952 | 0.427 |
| contig084886-BriTARs.A017 | contig022334-TiITARs.A029 | 0.135 | 0.315 | 0.427 |
| contig061433-BurTARs.A013 | contig060707-BurTARs.A015 | 0.341 | 0.799 | 0.427 |
| contig007524-TiITARs.A026 | contig053139-ZebTARs.A023 | 0.245 | 0.575 | 0.427 |
| contig060105-NyeTARs.A018 | contig022375-TiITARs.A048 | 0.339 | 0.795 | 0.427 |
| contig086351-BriTARs.A021 | contig053139-ZebTARs.A023 | 0.284 | 0.666 | 0.427 |
| contig007520-TiITARs.A025 | contig022363-TiITARs.A043 | 0.362 | 0.847 | 0.427 |
| contig086337-BriTARs.A019 | contig060292-NyeTARs.A027 | 0.289 | 0.677 | 0.427 |
| contig046013-NyeTARs.A021 | contig056134-TiITARs.A058 | 0.358 | 0.838 | 0.427 |
| contig060105-NyeTARs.A018 | contig022334-TiITARs.A029 | 0.337 | 0.789 | 0.427 |
| contig084868-BriTARs.A014 | contig060292-NyeTARs.A027 | 0.355 | 0.831 | 0.427 |
| contig084887-BriTARs.A018 | contig022354-TiITARs.A037 | 0.160 | 0.375 | 0.427 |
| contig084886-BriTARs.A017 | contig022368-TiITARs.A046 | 0.149 | 0.349 | 0.428 |
| contig084887-BriTARs.A018 | contig056020-BurTARs.A021 | 0.085 | 0.198 | 0.428 |
| contig030464-ZebTARs.A025 | contig053145-ZebTARs.A028 | 0.353 | 0.825 | 0.428 |
| contig039640-TiITAR.A003  | contig040586-ZebTAR.A001  | 0.045 | 0.106 | 0.428 |
| contig086337-BriTARs.A019 | contig035375-NyeTARs.A013 | 0.286 | 0.668 | 0.428 |
| contig022341-TiITARs.A032 | contig022378-TiITARs.A051 | 0.224 | 0.523 | 0.428 |
| contig035377-NyeTARs.A023 | contig022334-TiITARs.A030 | 0.251 | 0.588 | 0.428 |
| contig007520-TiITARs.A025 | contig022330-TiITARs.A028 | 0.327 | 0.764 | 0.428 |
| contig061977-BurTARs.A012 | contig022368-TiITARs.A046 | 0.241 | 0.563 | 0.428 |
| contig035376-NyeTARs.A014 | contig040586-ZebTAR.A001  | 0.405 | 0.948 | 0.428 |
| contig056021-BurTARs.A020 | contig022354-TiITARs.A038 | 0.129 | 0.301 | 0.428 |
| contig049540-BurTARs.A024 | contig066285-ZebTARs.A016 | 0.292 | 0.682 | 0.428 |
| contig035381-NyeTARs.A015 | contig022383-TiITARs.A054 | 0.106 | 0.248 | 0.428 |
| contig084868-BriTARs.A014 | contig046010-NyeTARs.A019 | 0.272 | 0.634 | 0.428 |
| contig046014-NyeTARs.A024 | contig022334-TiITARs.A029 | 0.114 | 0.267 | 0.428 |
| contig007518-TiITARs.A019 | contig053145-ZebTARs.A028 | 0.295 | 0.690 | 0.428 |
| contig084876-BriTARs.A015 | contig022365-TiITARs.A045 | 0.263 | 0.615 | 0.428 |
| contig060105-NyeTARs.A018 | contig022330-TiITARs.A028 | 0.334 | 0.780 | 0.428 |
| contig060707-BurTARs.A015 | contig066691-ZebTARs.A015 | 0.342 | 0.799 | 0.428 |

|                           |                           |       |       |       |
|---------------------------|---------------------------|-------|-------|-------|
| contig039640-TiITAR.A003  | contig066890-ZebTARs.A014 | 0.400 | 0.934 | 0.428 |
| contig084887-BriTARs.A018 | contig061417-ZebTARs.A020 | 0.117 | 0.272 | 0.428 |
| contig045302-BurTAR.A001  | contig030440-ZebTARs.A029 | 0.398 | 0.928 | 0.428 |
| contig059766-BurTARs.A029 | contig022354-TiITARs.A038 | 0.349 | 0.814 | 0.428 |
| contig046013-NyeTARs.A021 | contig022341-TiITARs.A032 | 0.137 | 0.319 | 0.428 |
| contig022354-TiITARs.A038 | contig045088-TiITARs.A057 | 0.364 | 0.850 | 0.428 |
| contig084868-BriTARs.A014 | contig039642-TiITAR.A004  | 0.397 | 0.926 | 0.428 |
| contig007524-TiITARs.A026 | contig022341-TiITARs.A032 | 0.348 | 0.812 | 0.428 |
| contig084868-BriTARs.A014 | contig049534-BurTARs.A025 | 0.279 | 0.651 | 0.428 |
| contig058002-NyeTARs.A025 | contig022363-TiITARs.A043 | 0.379 | 0.884 | 0.429 |
| contig059673-BurTARs.A016 | contig057301-BurTARs.A017 | 0.286 | 0.669 | 0.429 |
| contig061091-BurTARs.A014 | contig007512-TiITARs.A024 | 0.374 | 0.874 | 0.429 |
| contig057301-BurTARs.A017 | contig066285-ZebTARs.A016 | 0.384 | 0.896 | 0.429 |
| contig057301-BurTARs.A017 | contig022368-TiITARs.A046 | 0.370 | 0.862 | 0.429 |
| contig058002-NyeTARs.A025 | contig022368-TiITARs.A047 | 0.364 | 0.849 | 0.429 |
| contig059673-BurTARs.A016 | contig057305-BurTARs.A031 | 0.272 | 0.634 | 0.429 |
| contig046007-NyeTARs.A017 | contig022354-TiITARs.A038 | 0.133 | 0.309 | 0.429 |
| contig045302-BurTAR.A001  | contig039639-TiITAR.A001  | 0.064 | 0.148 | 0.429 |
| contig046007-NyeTARs.A017 | contig007524-TiITARs.A026 | 0.352 | 0.820 | 0.429 |
| contig086351-BriTARs.A021 | contig046010-NyeTARs.A019 | 0.416 | 0.970 | 0.429 |
| contig022341-TiITARs.A032 | contig056134-TiITARs.A058 | 0.356 | 0.830 | 0.429 |
| contig035376-NyeTARs.A014 | contig058002-NyeTARs.A025 | 0.308 | 0.719 | 0.429 |
| contig022362-TiITARs.A042 | contig022383-TiITARs.A054 | 0.266 | 0.620 | 0.429 |
| contig060105-NyeTARs.A018 | contig059768-ZebTARs.A022 | 0.348 | 0.811 | 0.429 |
| contig049534-BurTARs.A025 | contig062677-ZebTARs.A018 | 0.292 | 0.680 | 0.429 |
| contig056023-BurTARs.A019 | contig030464-ZebTARs.A025 | 0.187 | 0.436 | 0.429 |
| contig022383-TiITARs.A054 | contig066285-ZebTARs.A016 | 0.269 | 0.627 | 0.429 |
| contig055697-BurTARs.A022 | contig022356-TiITARs.A040 | 0.341 | 0.795 | 0.429 |
| contig045302-BurTAR.A001  | contig022383-TiITARs.A054 | 0.418 | 0.973 | 0.429 |
| contig022363-TiITARs.A043 | contig030445-ZebTARs.A026 | 0.264 | 0.615 | 0.429 |
| contig022341-TiITARs.A032 | contig061417-ZebTARs.A020 | 0.120 | 0.280 | 0.429 |
| contig061091-BurTARs.A014 | contig022345-TiITARs.A034 | 0.135 | 0.314 | 0.429 |
| contig057148-BurTARs.A028 | contig056200-NyeTARs.A029 | 0.277 | 0.645 | 0.429 |
| contig035377-NyeTARs.A023 | contig022320-TiITARs.A059 | 0.264 | 0.615 | 0.429 |
| contig007518-TiITARs.A019 | contig022349-TiITARs.A035 | 0.390 | 0.909 | 0.429 |
| contig022365-TiITARs.A045 | contig066056-ZebTARs.A017 | 0.344 | 0.801 | 0.429 |
| contig022379-TiITARs.A052 | contig066285-ZebTARs.A016 | 0.255 | 0.593 | 0.429 |
| contig022334-TiITARs.A030 | contig022354-TiITARs.A038 | 0.188 | 0.439 | 0.429 |
| contig056200-NyeTARs.A029 | contig066285-ZebTARs.A016 | 0.292 | 0.681 | 0.429 |
| contig007520-TiITARs.A025 | contig022354-TiITARs.A037 | 0.331 | 0.772 | 0.429 |
| contig035375-NyeTARs.A013 | contig066056-ZebTARs.A017 | 0.331 | 0.770 | 0.429 |
| contig086337-BriTARs.A019 | contig046013-NyeTARs.A021 | 0.361 | 0.841 | 0.429 |
| contig057301-BurTARs.A017 | contig030464-ZebTARs.A025 | 0.385 | 0.895 | 0.429 |
| contig022356-TiITARs.A040 | contig066330-ZebTARs.A027 | 0.361 | 0.839 | 0.430 |
| contig022343-TiITARs.A033 | contig066330-ZebTARs.A027 | 0.349 | 0.813 | 0.430 |
| contig045302-BurTAR.A001  | contig035376-NyeTARs.A014 | 0.402 | 0.937 | 0.430 |
| contig060707-BurTARs.A015 | contig035375-NyeTARs.A013 | 0.331 | 0.770 | 0.430 |
| contig084886-BriTARs.A017 | contig057145-BurTARs.A018 | 0.142 | 0.331 | 0.430 |
| contig058002-NyeTARs.A025 | contig045088-TiITARs.A057 | 0.273 | 0.634 | 0.430 |
| contig082565-BriTARs.A022 | contig045302-BurTAR.A001  | 0.392 | 0.912 | 0.430 |
| contig084886-BriTARs.A017 | contig022383-TiITARs.A054 | 0.259 | 0.603 | 0.430 |
| contig022377-TiITARs.A050 | contig056134-TiITARs.A058 | 0.346 | 0.805 | 0.430 |
| contig034854-BurTARs.A027 | contig059766-BurTARs.A029 | 0.289 | 0.672 | 0.430 |

|                           |                           |       |       |       |
|---------------------------|---------------------------|-------|-------|-------|
| contig022334-TiITARs.A030 | contig022378-TiITARs.A051 | 0.233 | 0.541 | 0.430 |
| contig084876-BriTARs.A015 | contig059768-ZebTARs.A022 | 0.329 | 0.766 | 0.430 |
| contig061410-ZebTARs.A021 | contig030471-ZebTARs.A024 | 0.257 | 0.598 | 0.430 |
| contig082565-BriTARs.A022 | contig022349-TiITARs.A035 | 0.258 | 0.601 | 0.430 |
| contig084868-BriTARs.A014 | contig022368-TiITARs.A046 | 0.271 | 0.631 | 0.430 |
| contig007518-TiITARs.A019 | contig030464-ZebTARs.A025 | 0.382 | 0.890 | 0.430 |
| contig086344-BriTARs.A020 | contig022375-TiITARs.A048 | 0.345 | 0.801 | 0.430 |
| contig058002-NyeTARs.A025 | contig022341-TiITARs.A032 | 0.351 | 0.817 | 0.430 |
| contig022337-TiITARs.A031 | contig066056-ZebTARs.A017 | 0.350 | 0.814 | 0.430 |
| contig057148-BurTARs.A028 | contig035377-NyeTARs.A023 | 0.266 | 0.619 | 0.430 |
| contig058002-NyeTARs.A025 | contig022357-TiITARs.A041 | 0.368 | 0.855 | 0.430 |
| contig056021-BurTARs.A020 | contig022341-TiITARs.A032 | 0.123 | 0.287 | 0.430 |
| contig086351-BriTARs.A021 | contig058002-NyeTARs.A025 | 0.263 | 0.611 | 0.430 |
| contig049540-BurTARs.A024 | contig022378-TiITARs.A051 | 0.254 | 0.590 | 0.430 |
| contig061091-BurTARs.A014 | contig022375-TiITARs.A048 | 0.145 | 0.337 | 0.430 |
| contig035381-NyeTARs.A015 | contig061417-ZebTARs.A020 | 0.242 | 0.562 | 0.430 |
| contig041024-BurTARs.A026 | contig022363-TiITARs.A043 | 0.140 | 0.324 | 0.430 |
| contig040586-ZebTAR.A001  | contig030440-ZebTARs.A029 | 0.402 | 0.933 | 0.430 |
| contig022354-TiITARs.A038 | contig022368-TiITARs.A046 | 0.138 | 0.320 | 0.430 |
| contig045302-BurTAR.A001  | contig057301-BurTARs.A017 | 0.479 | 1.112 | 0.430 |
| contig022343-TiITARs.A033 | contig022320-TiITARs.A059 | 0.128 | 0.297 | 0.430 |
| contig022337-TiITARs.A031 | contig022377-TiITARs.A050 | 0.133 | 0.310 | 0.430 |
| contig022330-TiITARs.A028 | contig066691-ZebTARs.A015 | 0.121 | 0.282 | 0.430 |
| contig060105-NyeTARs.A018 | contig007518-TiITARs.A019 | 0.321 | 0.747 | 0.430 |
| contig061977-BurTARs.A012 | contig022362-TiITARs.A042 | 0.239 | 0.556 | 0.430 |
| contig049540-BurTARs.A024 | contig046010-NyeTARs.A019 | 0.278 | 0.646 | 0.430 |
| contig056200-NyeTARs.A029 | contig007512-TiITARs.A024 | 0.341 | 0.792 | 0.431 |
| contig039640-TiITAR.A003  | contig022390-TiITARs.A055 | 0.432 | 1.004 | 0.431 |
| contig084880-BriTARs.A016 | contig022375-TiITARs.A048 | 0.192 | 0.445 | 0.431 |
| contig022330-TiITARs.A028 | contig062677-ZebTARs.A018 | 0.259 | 0.601 | 0.431 |
| contig084886-BriTARs.A017 | contig046007-NyeTARs.A017 | 0.143 | 0.332 | 0.431 |
| contig035381-NyeTARs.A015 | contig030464-ZebTARs.A025 | 0.257 | 0.596 | 0.431 |
| contig057301-BurTARs.A017 | contig046010-NyeTARs.A019 | 0.383 | 0.890 | 0.431 |
| contig060105-NyeTARs.A018 | contig022334-TiITARs.A030 | 0.354 | 0.823 | 0.431 |
| contig056200-NyeTARs.A029 | contig022341-TiITARs.A032 | 0.276 | 0.641 | 0.431 |
| contig022354-TiITARs.A037 | contig022368-TiITARs.A047 | 0.185 | 0.429 | 0.431 |
| contig065494-BurTARs.A030 | contig022354-TiITARs.A038 | 0.351 | 0.814 | 0.431 |
| contig022363-TiITARs.A044 | contig022390-TiITARs.A055 | 0.258 | 0.598 | 0.431 |
| contig007518-TiITARs.A019 | contig022345-TiITARs.A034 | 0.366 | 0.850 | 0.431 |
| contig056021-BurTARs.A020 | contig056020-BurTARs.A021 | 0.148 | 0.343 | 0.431 |
| contig066285-ZebTARs.A016 | contig061410-ZebTARs.A021 | 0.259 | 0.602 | 0.431 |
| contig007512-TiITARs.A024 | contig022356-TiITARs.A040 | 0.340 | 0.789 | 0.431 |
| contig084880-BriTARs.A016 | contig022341-TiITARs.A032 | 0.183 | 0.425 | 0.431 |
| contig086344-BriTARs.A020 | contig022377-TiITARs.A050 | 0.320 | 0.742 | 0.431 |
| contig056021-BurTARs.A020 | contig035381-NyeTARs.A015 | 0.243 | 0.564 | 0.431 |
| contig007524-TiITARs.A026 | contig022355-TiITARs.A039 | 0.351 | 0.815 | 0.431 |
| contig022334-TiITARs.A030 | contig022368-TiITARs.A046 | 0.178 | 0.412 | 0.431 |
| contig022349-TiITARs.A035 | contig030445-ZebTARs.A026 | 0.249 | 0.576 | 0.431 |
| contig061433-BurTARs.A013 | contig007512-TiITARs.A024 | 0.351 | 0.815 | 0.431 |
| contig056020-BurTARs.A021 | contig007524-TiITARs.A026 | 0.354 | 0.820 | 0.431 |
| contig084868-BriTARs.A014 | contig022365-TiITARs.A045 | 0.283 | 0.656 | 0.431 |
| contig007518-TiITARs.A019 | contig040586-ZebTAR.A002  | 0.486 | 1.127 | 0.431 |
| contig056021-BurTARs.A020 | contig022382-TiITARs.A053 | 0.253 | 0.585 | 0.432 |



|                           |                           |       |       |       |
|---------------------------|---------------------------|-------|-------|-------|
| contig057305-BurTARs.A031 | contig022383-TiITARs.A054 | 0.336 | 0.779 | 0.432 |
| contig035377-NyeTARs.A023 | contig022355-TiITARs.A039 | 0.276 | 0.640 | 0.432 |
| contig035377-NyeTARs.A023 | contig022390-TiITARs.A055 | 0.060 | 0.140 | 0.432 |
| contig022354-TiITARs.A037 | contig061417-ZebTARs.A020 | 0.162 | 0.374 | 0.432 |
| contig082565-BriTARs.A022 | contig066285-ZebTARs.A016 | 0.268 | 0.620 | 0.432 |
| contig060707-BurTARs.A015 | contig022356-TiITARs.A040 | 0.347 | 0.804 | 0.432 |
| contig055697-BurTARs.A022 | contig022337-TiITARs.A031 | 0.340 | 0.787 | 0.432 |
| contig058002-NyeTARs.A025 | contig022337-TiITARs.A031 | 0.358 | 0.830 | 0.432 |
| contig022341-TiITARs.A032 | contig022354-TiITARs.A038 | 0.121 | 0.279 | 0.432 |
| contig022363-TiITARs.A044 | contig022383-TiITARs.A054 | 0.236 | 0.547 | 0.432 |
| contig022354-TiITARs.A038 | contig022379-TiITARs.A052 | 0.238 | 0.551 | 0.432 |
| contig022353-TiITARs.A036 | contig022375-TiITARs.A048 | 0.136 | 0.314 | 0.432 |
| contig035375-NyeTARs.A013 | contig053145-ZebTARs.A028 | 0.284 | 0.658 | 0.432 |
| contig030464-ZebTARs.A025 | contig066330-ZebTARs.A027 | 0.357 | 0.827 | 0.432 |
| contig056020-BurTARs.A021 | contig060105-NyeTARs.A018 | 0.350 | 0.810 | 0.432 |
| contig061091-BurTARs.A014 | contig022320-TiITARs.A059 | 0.121 | 0.281 | 0.432 |
| contig022379-TiITARs.A052 | contig030440-ZebTARs.A029 | 0.134 | 0.309 | 0.432 |
| contig022377-TiITARs.A050 | contig022383-TiITARs.A054 | 0.254 | 0.587 | 0.432 |
| contig084886-BriTARs.A017 | contig045088-TiITARs.A057 | 0.367 | 0.849 | 0.432 |
| contig056021-BurTARs.A020 | contig022345-TiITARs.A034 | 0.121 | 0.279 | 0.432 |
| contig084876-BriTARs.A015 | contig059673-BurTARs.A016 | 0.334 | 0.773 | 0.432 |
| contig035381-NyeTARs.A015 | contig022330-TiITARs.A028 | 0.251 | 0.580 | 0.432 |
| contig086344-BriTARs.A020 | contig022334-TiITARs.A029 | 0.334 | 0.772 | 0.432 |
| contig059766-BurTARs.A029 | contig046010-NyeTARs.A019 | 0.358 | 0.828 | 0.432 |
| contig084886-BriTARs.A017 | contig022378-TiITARs.A051 | 0.250 | 0.579 | 0.432 |
| contig061433-BurTARs.A013 | contig022363-TiITARs.A044 | 0.201 | 0.465 | 0.432 |
| contig042499-NyeTARs.A028 | contig040586-ZebTAR.A001  | 0.497 | 1.148 | 0.432 |
| contig061977-BurTARs.A012 | contig061417-ZebTARs.A020 | 0.236 | 0.546 | 0.432 |
| contig022334-TiITARs.A030 | contig022390-TiITARs.A056 | 0.255 | 0.591 | 0.433 |
| contig062677-ZebTARs.A018 | contig061417-ZebTARs.A020 | 0.269 | 0.623 | 0.433 |
| contig049534-BurTARs.A025 | contig061410-ZebTARs.A021 | 0.259 | 0.599 | 0.433 |
| contig038663-NyeTAR.A005  | contig022383-TiITARs.A054 | 0.420 | 0.972 | 0.433 |
| contig086344-BriTARs.A020 | contig066691-ZebTARs.A015 | 0.351 | 0.811 | 0.433 |
| contig038663-NyeTAR.A005  | contig007518-TiITARs.A019 | 0.485 | 1.122 | 0.433 |
| contig022375-TiITARs.A048 | contig022379-TiITARs.A052 | 0.212 | 0.489 | 0.433 |
| contig022356-TiITARs.A040 | contig022379-TiITARs.A052 | 0.246 | 0.569 | 0.433 |
| contig022341-TiITARs.A032 | contig022345-TiITARs.A034 | 0.109 | 0.252 | 0.433 |
| contig035381-NyeTARs.A015 | contig022379-TiITARs.A052 | 0.129 | 0.299 | 0.433 |
| contig035381-NyeTARs.A015 | contig022354-TiITARs.A037 | 0.225 | 0.519 | 0.433 |
| contig046013-NyeTARs.A021 | contig007512-TiITARs.A024 | 0.370 | 0.856 | 0.433 |
| contig022345-TiITARs.A034 | contig030440-ZebTARs.A029 | 0.261 | 0.602 | 0.433 |
| contig059673-BurTARs.A016 | contig035381-NyeTARs.A015 | 0.324 | 0.748 | 0.433 |
| contig030464-ZebTARs.A025 | contig030440-ZebTARs.A029 | 0.261 | 0.603 | 0.433 |
| contig022368-TiITARs.A046 | contig061417-ZebTARs.A020 | 0.141 | 0.325 | 0.433 |
| contig057148-BurTARs.A028 | contig045999-NyeTARs.A026 | 0.185 | 0.427 | 0.433 |
| contig022349-TiITARs.A035 | contig061410-ZebTARs.A021 | 0.256 | 0.590 | 0.433 |
| contig082565-BriTARs.A022 | contig057145-BurTARs.A018 | 0.243 | 0.560 | 0.433 |
| contig022382-TiITARs.A053 | contig022383-TiITARs.A054 | 0.155 | 0.358 | 0.433 |
| contig061091-BurTARs.A014 | contig046010-NyeTARs.A019 | 0.158 | 0.365 | 0.433 |
| contig059673-BurTARs.A016 | contig045088-TiITARs.A057 | 0.285 | 0.657 | 0.433 |
| contig084886-BriTARs.A017 | contig061417-ZebTARs.A020 | 0.135 | 0.312 | 0.433 |
| contig058002-NyeTARs.A025 | contig022334-TiITARs.A030 | 0.337 | 0.779 | 0.433 |
| contig084868-BriTARs.A014 | contig022349-TiITARs.A035 | 0.282 | 0.652 | 0.433 |

|                           |                           |       |       |       |
|---------------------------|---------------------------|-------|-------|-------|
| contig034854-BurTARs.A027 | contig040586-ZebTAR.A002  | 0.384 | 0.886 | 0.433 |
| contig060707-BurTARs.A015 | contig022363-TiITARs.A044 | 0.349 | 0.805 | 0.433 |
| contig034854-BurTARs.A027 | contig040586-ZebTAR.A001  | 0.394 | 0.909 | 0.433 |
| contig022349-TiITARs.A035 | contig022320-TiITARs.A059 | 0.141 | 0.326 | 0.433 |
| contig049540-BurTARs.A024 | contig022334-TiITARs.A030 | 0.240 | 0.553 | 0.434 |
| contig038663-NyeTAR.A005  | contig042499-NyeTARs.A028 | 0.498 | 1.149 | 0.434 |
| contig084868-BriTARs.A014 | contig040586-ZebTAR.A001  | 0.409 | 0.943 | 0.434 |
| contig086344-BriTARs.A020 | contig022356-TiITARs.A040 | 0.351 | 0.809 | 0.434 |
| contig082565-BriTARs.A022 | contig007518-TiITARs.A019 | 0.337 | 0.776 | 0.434 |
| contig035377-NyeTARs.A023 | contig066890-ZebTARs.A014 | 0.024 | 0.056 | 0.434 |
| contig084886-BriTARs.A017 | contig042499-NyeTARs.A028 | 0.361 | 0.833 | 0.434 |
| contig042499-NyeTARs.A028 | contig023443-TiITAR.A005  | 0.408 | 0.941 | 0.434 |
| contig086344-BriTARs.A020 | contig030440-ZebTARs.A029 | 0.339 | 0.782 | 0.434 |
| contig022337-TiITARs.A031 | contig030440-ZebTARs.A029 | 0.262 | 0.603 | 0.434 |
| contig042499-NyeTARs.A028 | contig022354-TiITARs.A038 | 0.368 | 0.847 | 0.434 |
| contig060707-BurTARs.A015 | contig022355-TiITARs.A039 | 0.336 | 0.773 | 0.434 |
| contig082565-BriTARs.A022 | contig057148-BurTARs.A028 | 0.256 | 0.590 | 0.434 |
| contig029633-BriTAR.A003  | contig035377-NyeTARs.A023 | 0.437 | 1.007 | 0.434 |
| contig022334-TiITARs.A029 | contig022354-TiITARs.A038 | 0.130 | 0.298 | 0.434 |
| contig045999-NyeTARs.A026 | contig022341-TiITARs.A032 | 0.182 | 0.420 | 0.434 |
| contig082565-BriTARs.A022 | contig022363-TiITARs.A043 | 0.277 | 0.637 | 0.434 |
| contig056021-BurTARs.A020 | contig066691-ZebTARs.A015 | 0.124 | 0.285 | 0.434 |
| contig056021-BurTARs.A020 | contig022343-TiITARs.A033 | 0.113 | 0.260 | 0.434 |
| contig054630-BurTARs.A023 | contig022330-TiITARs.A028 | 0.366 | 0.842 | 0.434 |
| contig059766-BurTARs.A029 | contig035375-NyeTARs.A013 | 0.286 | 0.659 | 0.434 |
| contig029633-BriTAR.A003  | contig022368-TiITARs.A047 | 0.447 | 1.029 | 0.434 |
| contig065494-BurTARs.A030 | contig007518-TiITARs.A019 | 0.300 | 0.692 | 0.434 |
| contig022345-TiITARs.A034 | contig061417-ZebTARs.A020 | 0.121 | 0.278 | 0.434 |
| contig057148-BurTARs.A028 | contig060292-NyeTARs.A027 | 0.408 | 0.939 | 0.434 |
| contig029633-BriTAR.A003  | contig022383-TiITARs.A054 | 0.420 | 0.966 | 0.434 |
| contig057148-BurTARs.A028 | contig007520-TiITARs.A025 | 0.347 | 0.799 | 0.434 |
| contig038663-NyeTAR.A005  | contig035375-NyeTARs.A013 | 0.406 | 0.935 | 0.435 |
| contig022330-TiITARs.A028 | contig022354-TiITARs.A038 | 0.128 | 0.294 | 0.435 |
| contig061417-ZebTARs.A020 | contig059768-ZebTARs.A022 | 0.370 | 0.852 | 0.435 |
| contig040586-ZebTAR.A002  | contig066890-ZebTARs.A014 | 0.422 | 0.970 | 0.435 |
| contig046010-NyeTARs.A019 | contig066691-ZebTARs.A015 | 0.157 | 0.362 | 0.435 |
| contig022354-TiITARs.A038 | contig022390-TiITARs.A056 | 0.254 | 0.584 | 0.435 |
| contig049534-BurTARs.A025 | contig022357-TiITARs.A041 | 0.160 | 0.369 | 0.435 |
| contig041024-BurTARs.A026 | contig022383-TiITARs.A054 | 0.247 | 0.569 | 0.435 |
| contig059673-BurTARs.A016 | contig022368-TiITARs.A046 | 0.361 | 0.832 | 0.435 |
| contig061433-BurTARs.A013 | contig007518-TiITARs.A019 | 0.369 | 0.850 | 0.435 |
| contig049534-BurTARs.A025 | contig035377-NyeTARs.A023 | 0.272 | 0.627 | 0.435 |
| contig022365-TiITARs.A045 | contig022379-TiITARs.A052 | 0.252 | 0.580 | 0.435 |
| contig061977-BurTARs.A012 | contig022349-TiITARs.A035 | 0.253 | 0.583 | 0.435 |
| contig065494-BurTARs.A030 | contig046010-NyeTARs.A019 | 0.360 | 0.828 | 0.435 |
| contig022383-TiITARs.A054 | contig022320-TiITARs.A059 | 0.247 | 0.567 | 0.435 |
| contig084880-BriTARs.A016 | contig022354-TiITARs.A038 | 0.183 | 0.422 | 0.435 |
| contig022377-TiITARs.A050 | contig062677-ZebTARs.A018 | 0.271 | 0.622 | 0.435 |
| contig084886-BriTARs.A017 | contig066691-ZebTARs.A015 | 0.156 | 0.359 | 0.435 |
| contig022330-TiITARs.A028 | contig022368-TiITARs.A047 | 0.149 | 0.341 | 0.435 |
| contig054630-BurTARs.A023 | contig061417-ZebTARs.A020 | 0.377 | 0.866 | 0.435 |
| contig084868-BriTARs.A014 | contig066285-ZebTARs.A016 | 0.278 | 0.639 | 0.435 |
| contig056021-BurTARs.A020 | contig056200-NyeTARs.A029 | 0.265 | 0.609 | 0.435 |

|                           |                           |       |       |       |
|---------------------------|---------------------------|-------|-------|-------|
| contig045999-NyeTARs.A026 | contig030464-ZebTARs.A025 | 0.187 | 0.430 | 0.435 |
| contig035381-NyeTARs.A015 | contig022363-TiITARs.A043 | 0.275 | 0.631 | 0.435 |
| contig035377-NyeTARs.A023 | contig022362-TiITARs.A042 | 0.273 | 0.626 | 0.435 |
| contig046014-NyeTARs.A024 | contig022330-TiITARs.A028 | 0.116 | 0.266 | 0.435 |
| contig022354-TiITARs.A038 | contig022362-TiITARs.A042 | 0.145 | 0.332 | 0.435 |
| contig042499-NyeTARs.A028 | contig066285-ZebTARs.A016 | 0.391 | 0.898 | 0.435 |
| contig062677-ZebTARs.A018 | contig030464-ZebTARs.A025 | 0.283 | 0.650 | 0.436 |
| contig056021-BurTARs.A020 | contig058002-NyeTARs.A025 | 0.333 | 0.764 | 0.436 |
| contig046010-NyeTARs.A019 | contig046013-NyeTARs.A021 | 0.154 | 0.354 | 0.436 |
| contig046013-NyeTARs.A021 | contig007518-TiITARs.A019 | 0.374 | 0.859 | 0.436 |
| contig082565-BriTARs.A022 | contig022341-TiITARs.A032 | 0.253 | 0.581 | 0.436 |
| contig041024-BurTARs.A026 | contig022379-TiITARs.A052 | 0.240 | 0.551 | 0.436 |
| contig056021-BurTARs.A020 | contig066056-ZebTARs.A017 | 0.323 | 0.740 | 0.436 |
| contig061433-BurTARs.A013 | contig022354-TiITARs.A037 | 0.208 | 0.478 | 0.436 |
| contig041024-BurTARs.A026 | contig035377-NyeTARs.A023 | 0.261 | 0.600 | 0.436 |
| contig022354-TiITARs.A037 | contig022383-TiITARs.A054 | 0.225 | 0.517 | 0.436 |
| contig060292-NyeTARs.A027 | contig022383-TiITARs.A054 | 0.337 | 0.774 | 0.436 |
| contig060707-BurTARs.A015 | contig007518-TiITARs.A019 | 0.320 | 0.734 | 0.436 |
| contig035377-NyeTARs.A023 | contig022354-TiITARs.A038 | 0.257 | 0.589 | 0.436 |
| contig062039-NyeTARs.A022 | contig022390-TiITARs.A056 | 0.233 | 0.535 | 0.436 |
| contig056021-BurTARs.A020 | contig061410-ZebTARs.A021 | 0.237 | 0.544 | 0.436 |
| contig061091-BurTARs.A014 | contig022330-TiITARs.A028 | 0.118 | 0.271 | 0.436 |
| contig084887-BriTARs.A018 | contig022356-TiITARs.A040 | 0.118 | 0.270 | 0.436 |
| contig045302-BurTAR.A001  | contig035381-NyeTARs.A015 | 0.396 | 0.906 | 0.436 |
| contig056021-BurTARs.A020 | contig030471-ZebTARs.A024 | 0.121 | 0.277 | 0.436 |
| contig022343-TiITARs.A033 | contig061417-ZebTARs.A020 | 0.113 | 0.259 | 0.436 |
| contig022330-TiITARs.A028 | contig022341-TiITARs.A032 | 0.125 | 0.286 | 0.437 |
| contig035376-NyeTARs.A014 | contig022354-TiITARs.A038 | 0.242 | 0.555 | 0.437 |
| contig046013-NyeTARs.A021 | contig030471-ZebTARs.A024 | 0.075 | 0.171 | 0.437 |
| contig007520-TiITARs.A025 | contig022382-TiITARs.A053 | 0.316 | 0.724 | 0.437 |
| contig035376-NyeTARs.A014 | contig022349-TiITARs.A035 | 0.259 | 0.593 | 0.437 |
| contig029633-BriTAR.A003  | contig035381-NyeTARs.A015 | 0.399 | 0.914 | 0.437 |
| contig056023-BurTARs.A019 | contig057148-BurTARs.A028 | 0.189 | 0.434 | 0.437 |
| contig065494-BurTARs.A030 | contig022357-TiITARs.A041 | 0.392 | 0.898 | 0.437 |
| contig086344-BriTARs.A020 | contig034854-BurTARs.A027 | 0.349 | 0.799 | 0.437 |
| contig056020-BurTARs.A021 | contig022354-TiITARs.A038 | 0.128 | 0.294 | 0.437 |
| contig022377-TiITARs.A050 | contig030445-ZebTARs.A026 | 0.242 | 0.554 | 0.437 |
| contig022357-TiITARs.A041 | contig066056-ZebTARs.A017 | 0.339 | 0.776 | 0.437 |
| contig022365-TiITARs.A045 | contig022368-TiITARs.A046 | 0.090 | 0.206 | 0.437 |
| contig057145-BurTARs.A018 | contig030464-ZebTARs.A025 | 0.146 | 0.334 | 0.437 |
| contig084876-BriTARs.A015 | contig022330-TiITARs.A028 | 0.242 | 0.553 | 0.437 |
| contig022354-TiITARs.A038 | contig030445-ZebTARs.A026 | 0.234 | 0.536 | 0.437 |
| contig084876-BriTARs.A015 | contig054630-BurTARs.A023 | 0.335 | 0.767 | 0.437 |
| contig022341-TiITARs.A032 | contig022390-TiITARs.A056 | 0.258 | 0.590 | 0.437 |
| contig056021-BurTARs.A020 | contig007520-TiITARs.A025 | 0.325 | 0.743 | 0.437 |
| contig084876-BriTARs.A015 | contig038663-NyeTAR.A005  | 0.421 | 0.963 | 0.437 |
| contig032272-NyeTAR.A004  | contig045088-TiITARs.A057 | 0.410 | 0.937 | 0.437 |
| contig049534-BurTARs.A025 | contig035376-NyeTARs.A014 | 0.264 | 0.604 | 0.437 |
| contig049534-BurTARs.A025 | contig022330-TiITARs.A028 | 0.156 | 0.356 | 0.437 |
| contig056020-BurTARs.A021 | contig060292-NyeTARs.A027 | 0.403 | 0.921 | 0.437 |
| contig045302-BurTAR.A001  | contig046011-NyeTARs.A016 | 0.514 | 1.175 | 0.437 |
| contig035377-NyeTARs.A023 | contig022379-TiITARs.A052 | 0.159 | 0.364 | 0.437 |
| contig035381-NyeTARs.A015 | contig022343-TiITARs.A033 | 0.258 | 0.590 | 0.437 |

|                           |                           |       |       |       |
|---------------------------|---------------------------|-------|-------|-------|
| contig057145-BurTARs.A018 | contig053139-ZebTARs.A023 | 0.348 | 0.795 | 0.437 |
| contig061433-BurTARs.A013 | contig056020-BurTARs.A021 | 0.195 | 0.445 | 0.438 |
| contig057145-BurTARs.A018 | contig035376-NyeTARs.A014 | 0.245 | 0.560 | 0.438 |
| contig039642-TiITARs.A004 | contig066890-ZebTARs.A014 | 0.413 | 0.944 | 0.438 |
| contig007520-TiITARs.A025 | contig030464-ZebTARs.A025 | 0.355 | 0.812 | 0.438 |
| contig007520-TiITARs.A025 | contig022334-TiITARs.A029 | 0.327 | 0.746 | 0.438 |
| contig060707-BurTARs.A015 | contig022377-TiITARs.A050 | 0.320 | 0.732 | 0.438 |
| contig022390-TiITARs.A055 | contig030440-ZebTARs.A029 | 0.080 | 0.183 | 0.438 |
| contig007518-TiITARs.A019 | contig022368-TiITARs.A046 | 0.365 | 0.835 | 0.438 |
| contig084868-BriTARs.A014 | contig041024-BurTARs.A026 | 0.259 | 0.592 | 0.438 |
| contig049534-BurTARs.A025 | contig007518-TiITARs.A019 | 0.383 | 0.875 | 0.438 |
| contig022355-TiITARs.A039 | contig066691-ZebTARs.A015 | 0.086 | 0.196 | 0.438 |
| contig007520-TiITARs.A025 | contig062677-ZebTARs.A018 | 0.333 | 0.760 | 0.438 |
| contig060292-NyeTARs.A027 | contig061410-ZebTARs.A021 | 0.317 | 0.723 | 0.438 |
| contig035381-NyeTARs.A015 | contig022334-TiITARs.A029 | 0.251 | 0.573 | 0.438 |
| contig049540-BurTARs.A024 | contig022330-TiITARs.A028 | 0.258 | 0.589 | 0.438 |
| contig025313-BriTARs.A002 | contig057301-BurTARs.A017 | 0.400 | 0.913 | 0.438 |
| contig058002-NyeTARs.A025 | contig066285-ZebTARs.A016 | 0.367 | 0.838 | 0.438 |
| contig046007-NyeTARs.A017 | contig022368-TiITARs.A046 | 0.142 | 0.323 | 0.438 |
| contig022368-TiITARs.A046 | contig061410-ZebTARs.A021 | 0.243 | 0.555 | 0.438 |
| contig022368-TiITARs.A046 | contig022375-TiITARs.A048 | 0.154 | 0.351 | 0.438 |
| contig059766-BurTARs.A029 | contig022382-TiITARs.A053 | 0.336 | 0.767 | 0.438 |
| contig061091-BurTARs.A014 | contig030464-ZebTARs.A025 | 0.160 | 0.364 | 0.438 |
| contig046010-NyeTARs.A019 | contig022390-TiITARs.A056 | 0.264 | 0.603 | 0.438 |
| contig034854-BurTARs.A027 | contig057148-BurTARs.A028 | 0.276 | 0.629 | 0.438 |
| contig059766-BurTARs.A029 | contig030464-ZebTARs.A025 | 0.363 | 0.827 | 0.438 |
| contig035377-NyeTARs.A023 | contig022377-TiITARs.A050 | 0.254 | 0.579 | 0.438 |
| contig035376-NyeTARs.A014 | contig022341-TiITARs.A032 | 0.252 | 0.574 | 0.438 |
| contig084886-BriTARs.A017 | contig022341-TiITARs.A032 | 0.135 | 0.308 | 0.438 |
| contig086351-BriTARs.A021 | contig042499-NyeTARs.A028 | 0.225 | 0.514 | 0.439 |
| contig022349-TiITARs.A035 | contig022383-TiITARs.A054 | 0.271 | 0.617 | 0.439 |
| contig022330-TiITARs.A028 | contig022375-TiITARs.A048 | 0.150 | 0.342 | 0.439 |
| contig035381-NyeTARs.A015 | contig046010-NyeTARs.A019 | 0.255 | 0.580 | 0.439 |
| contig086344-BriTARs.A020 | contig022330-TiITARs.A028 | 0.335 | 0.764 | 0.439 |
| contig022353-TiITARs.A036 | contig066056-ZebTARs.A017 | 0.314 | 0.716 | 0.439 |
| contig061417-ZebTARs.A020 | contig030471-ZebTARs.A024 | 0.121 | 0.276 | 0.439 |
| contig022337-TiITARs.A031 | contig022356-TiITARs.A040 | 0.133 | 0.303 | 0.439 |
| contig057145-BurTARs.A018 | contig022356-TiITARs.A040 | 0.039 | 0.090 | 0.439 |
| contig049540-BurTARs.A024 | contig057148-BurTARs.A028 | 0.280 | 0.637 | 0.439 |
| contig022356-TiITARs.A040 | contig053139-ZebTARs.A023 | 0.345 | 0.785 | 0.439 |
| contig084880-BriTARs.A016 | contig007518-TiITARs.A019 | 0.395 | 0.899 | 0.439 |
| contig022382-TiITARs.A053 | contig053145-ZebTARs.A028 | 0.336 | 0.766 | 0.439 |
| contig035381-NyeTARs.A015 | contig022337-TiITARs.A031 | 0.265 | 0.603 | 0.439 |
| contig049540-BurTARs.A024 | contig059766-BurTARs.A029 | 0.343 | 0.781 | 0.439 |
| contig086337-BriTARs.A019 | contig007518-TiITARs.A019 | 0.293 | 0.667 | 0.439 |
| contig022341-TiITARs.A032 | contig030445-ZebTARs.A026 | 0.246 | 0.561 | 0.439 |
| contig038663-NyeTARs.A005 | contig046011-NyeTARs.A016 | 0.521 | 1.186 | 0.439 |
| contig057145-BurTARs.A018 | contig022363-TiITARs.A044 | 0.160 | 0.365 | 0.439 |
| contig058002-NyeTARs.A025 | contig022365-TiITARs.A045 | 0.371 | 0.844 | 0.439 |
| contig022379-TiITARs.A052 | contig030464-ZebTARs.A025 | 0.257 | 0.585 | 0.439 |
| contig084887-BriTARs.A018 | contig060105-NyeTARs.A018 | 0.333 | 0.757 | 0.439 |
| contig022362-TiITARs.A042 | contig022377-TiITARs.A050 | 0.169 | 0.385 | 0.439 |
| contig022330-TiITARs.A028 | contig059768-ZebTARs.A022 | 0.359 | 0.818 | 0.439 |

|                           |                           |       |       |       |
|---------------------------|---------------------------|-------|-------|-------|
| contig084868-BriTARs.A014 | contig022368-TiITARs.A047 | 0.284 | 0.647 | 0.439 |
| contig022354-TiITARs.A038 | contig066691-ZebTARs.A015 | 0.145 | 0.329 | 0.439 |
| contig057305-BurTARs.A031 | contig061410-ZebTARs.A021 | 0.316 | 0.718 | 0.439 |
| contig022354-TiITARs.A037 | contig022357-TiITARs.A041 | 0.188 | 0.427 | 0.439 |
| contig022378-TiITARs.A051 | contig062677-ZebTARs.A018 | 0.257 | 0.585 | 0.439 |
| contig035381-NyeTARs.A015 | contig007524-TiITARs.A026 | 0.319 | 0.726 | 0.440 |
| contig086351-BriTARs.A021 | contig062676-ZebTARs.A019 | 0.350 | 0.796 | 0.440 |
| contig086344-BriTARs.A020 | contig022363-TiITARs.A044 | 0.355 | 0.807 | 0.440 |
| contig062039-NyeTARs.A022 | contig022379-TiITARs.A052 | 0.195 | 0.445 | 0.440 |
| contig060105-NyeTARs.A018 | contig030440-ZebTARs.A029 | 0.335 | 0.761 | 0.440 |
| contig061433-BurTARs.A013 | contig054630-BurTARs.A023 | 0.423 | 0.963 | 0.440 |
| contig022362-TiITARs.A042 | contig066056-ZebTARs.A017 | 0.348 | 0.791 | 0.440 |
| contig082565-BriTARs.A022 | contig040586-ZebTAR.A001  | 0.395 | 0.898 | 0.440 |
| contig022354-TiITARs.A038 | contig022355-TiITARs.A039 | 0.125 | 0.285 | 0.440 |
| contig035377-NyeTARs.A023 | contig022334-TiITARs.A029 | 0.257 | 0.583 | 0.440 |
| contig056021-BurTARs.A020 | contig022368-TiITARs.A047 | 0.148 | 0.337 | 0.440 |
| contig022362-TiITARs.A042 | contig056134-TiITARs.A058 | 0.333 | 0.757 | 0.440 |
| contig046013-NyeTARs.A021 | contig022334-TiITARs.A029 | 0.117 | 0.265 | 0.440 |
| contig049540-BurTARs.A024 | contig053145-ZebTARs.A028 | 0.343 | 0.779 | 0.440 |
| contig022365-TiITARs.A045 | contig022375-TiITARs.A048 | 0.160 | 0.365 | 0.440 |
| contig060105-NyeTARs.A018 | contig066691-ZebTARs.A015 | 0.348 | 0.791 | 0.440 |
| contig022343-TiITARs.A033 | contig022375-TiITARs.A048 | 0.157 | 0.357 | 0.440 |
| contig022390-TiITARs.A056 | contig040586-ZebTAR.A002  | 0.416 | 0.945 | 0.440 |
| contig049540-BurTARs.A024 | contig061417-ZebTARs.A020 | 0.268 | 0.610 | 0.440 |
| contig060707-BurTARs.A015 | contig046007-NyeTARs.A017 | 0.357 | 0.812 | 0.440 |
| contig061091-BurTARs.A014 | contig056021-BurTARs.A020 | 0.120 | 0.274 | 0.440 |
| contig022337-TiITARs.A031 | contig053139-ZebTARs.A023 | 0.343 | 0.779 | 0.440 |
| contig086344-BriTARs.A020 | contig035375-NyeTARs.A013 | 0.341 | 0.774 | 0.440 |
| contig022324-TiITARs.A027 | contig056134-TiITARs.A058 | 0.377 | 0.857 | 0.440 |
| contig022355-TiITARs.A039 | contig062677-ZebTARs.A018 | 0.280 | 0.637 | 0.440 |
| contig029633-BriTAR.A003  | contig084880-BriTARs.A016 | 0.475 | 1.078 | 0.440 |
| contig049534-BurTARs.A025 | contig022379-TiITARs.A052 | 0.257 | 0.583 | 0.440 |
| contig022354-TiITARs.A038 | contig062676-ZebTARs.A019 | 0.240 | 0.544 | 0.441 |
| contig035381-NyeTARs.A015 | contig022363-TiITARs.A044 | 0.231 | 0.523 | 0.441 |
| contig060105-NyeTARs.A018 | contig066890-ZebTARs.A014 | 0.333 | 0.756 | 0.441 |
| contig057148-BurTARs.A028 | contig057305-BurTARs.A031 | 0.408 | 0.926 | 0.441 |
| contig056020-BurTARs.A021 | contig046013-NyeTARs.A021 | 0.083 | 0.189 | 0.441 |
| contig065494-BurTARs.A030 | contig022382-TiITARs.A053 | 0.341 | 0.775 | 0.441 |
| contig022330-TiITARs.A028 | contig022379-TiITARs.A052 | 0.235 | 0.534 | 0.441 |
| contig022390-TiITARs.A055 | contig061417-ZebTARs.A020 | 0.213 | 0.483 | 0.441 |
| contig062039-NyeTARs.A022 | contig022354-TiITARs.A038 | 0.256 | 0.580 | 0.441 |
| contig065494-BurTARs.A030 | contig030464-ZebTARs.A025 | 0.365 | 0.828 | 0.441 |
| contig084886-BriTARs.A017 | contig061091-BurTARs.A014 | 0.153 | 0.347 | 0.441 |
| contig022343-TiITARs.A033 | contig022345-TiITARs.A034 | 0.134 | 0.304 | 0.441 |
| contig049534-BurTARs.A025 | contig056200-NyeTARs.A029 | 0.292 | 0.662 | 0.441 |
| contig049540-BurTARs.A024 | contig049534-BurTARs.A025 | 0.292 | 0.662 | 0.441 |
| contig046013-NyeTARs.A021 | contig022355-TiITARs.A039 | 0.086 | 0.195 | 0.441 |
| contig061977-BurTARs.A012 | contig022357-TiITARs.A041 | 0.262 | 0.594 | 0.441 |
| contig035377-NyeTARs.A023 | contig022363-TiITARs.A044 | 0.247 | 0.560 | 0.441 |
| contig022362-TiITARs.A042 | contig061410-ZebTARs.A021 | 0.242 | 0.548 | 0.441 |
| contig025313-BriTAR.A002  | contig045088-TiITARs.A057 | 0.400 | 0.907 | 0.441 |
| contig045302-BurTAR.A001  | contig034854-BurTARs.A027 | 0.389 | 0.882 | 0.441 |
| contig082565-BriTARs.A022 | contig059673-BurTARs.A016 | 0.334 | 0.756 | 0.441 |

|                           |                           |       |       |       |
|---------------------------|---------------------------|-------|-------|-------|
| contig061091-BurTARs.A014 | contig057148-BurTARs.A028 | 0.162 | 0.367 | 0.441 |
| contig007518-TiITARs.A019 | contig022337-TiITARs.A031 | 0.391 | 0.885 | 0.442 |
| contig022377-TiITARs.A050 | contig045088-TiITARs.A057 | 0.363 | 0.823 | 0.442 |
| contig022356-TiITARs.A040 | contig030471-ZebTARs.A024 | 0.124 | 0.280 | 0.442 |
| contig022341-TiITARs.A032 | contig022382-TiITARs.A053 | 0.269 | 0.609 | 0.442 |
| contig059673-BurTARs.A016 | contig022355-TiITARs.A039 | 0.364 | 0.824 | 0.442 |
| contig059673-BurTARs.A016 | contig057145-BurTARs.A018 | 0.360 | 0.814 | 0.442 |
| contig022357-TiITARs.A041 | contig066330-ZebTARs.A027 | 0.395 | 0.893 | 0.442 |
| contig022362-TiITARs.A042 | contig066285-ZebTARs.A016 | 0.189 | 0.428 | 0.442 |
| contig086344-BriTARs.A020 | contig046013-NyeTARs.A021 | 0.350 | 0.791 | 0.442 |
| contig022334-TiITARs.A030 | contig030464-ZebTARs.A025 | 0.199 | 0.451 | 0.442 |
| contig022368-TiITARs.A047 | contig061417-ZebTARs.A020 | 0.145 | 0.329 | 0.442 |
| contig057145-BurTARs.A018 | contig055697-BurTARs.A022 | 0.351 | 0.795 | 0.442 |
| contig057305-BurTARs.A031 | contig022378-TiITARs.A051 | 0.365 | 0.825 | 0.442 |
| contig022362-TiITARs.A042 | contig062677-ZebTARs.A018 | 0.268 | 0.606 | 0.442 |
| contig046010-NyeTARs.A019 | contig060292-NyeTARs.A027 | 0.409 | 0.924 | 0.442 |
| contig007520-TiITARs.A025 | contig022363-TiITARs.A044 | 0.354 | 0.801 | 0.442 |
| contig060707-BurTARs.A015 | contig030471-ZebTARs.A024 | 0.344 | 0.778 | 0.442 |
| contig057301-BurTARs.A017 | contig032272-NyeTAR.A004  | 0.415 | 0.940 | 0.442 |
| contig049534-BurTARs.A025 | contig022353-TiITARs.A036 | 0.167 | 0.377 | 0.442 |
| contig086351-BriTARs.A021 | contig045088-TiITARs.A057 | 0.229 | 0.519 | 0.442 |
| contig084886-BriTARs.A017 | contig022368-TiITARs.A047 | 0.151 | 0.341 | 0.442 |
| contig082565-BriTARs.A022 | contig061977-BurTARs.A012 | 0.129 | 0.291 | 0.442 |
| contig084887-BriTARs.A018 | contig022365-TiITARs.A045 | 0.141 | 0.319 | 0.442 |
| contig022334-TiITARs.A029 | contig062677-ZebTARs.A018 | 0.259 | 0.585 | 0.442 |
| contig046014-NyeTARs.A024 | contig022363-TiITARs.A043 | 0.138 | 0.312 | 0.442 |
| contig056023-BurTARs.A019 | contig022390-TiITARs.A055 | 0.327 | 0.740 | 0.442 |
| contig057148-BurTARs.A028 | contig058002-NyeTARs.A025 | 0.349 | 0.788 | 0.442 |
| contig061091-BurTARs.A014 | contig061417-ZebTARs.A020 | 0.121 | 0.273 | 0.442 |
| contig041024-BurTARs.A026 | contig030445-ZebTARs.A026 | 0.220 | 0.497 | 0.443 |
| contig057301-BurTARs.A017 | contig003909-ZebTAR.A003  | 0.410 | 0.927 | 0.443 |
| contig029633-BriTAR.A003  | contig034854-BurTARs.A027 | 0.392 | 0.885 | 0.443 |
| contig034854-BurTARs.A027 | contig060105-NyeTARs.A018 | 0.344 | 0.778 | 0.443 |
| contig045302-BurTAR.A001  | contig007518-TiITARs.A019 | 0.469 | 1.059 | 0.443 |
| contig046014-NyeTARs.A024 | contig022362-TiITARs.A042 | 0.133 | 0.300 | 0.443 |
| contig022354-TiITARs.A038 | contig022378-TiITARs.A051 | 0.240 | 0.543 | 0.443 |
| contig061977-BurTARs.A012 | contig060292-NyeTARs.A027 | 0.333 | 0.751 | 0.443 |
| contig049540-BurTARs.A024 | contig007520-TiITARs.A025 | 0.331 | 0.748 | 0.443 |
| contig046013-NyeTARs.A021 | contig030464-ZebTARs.A025 | 0.157 | 0.355 | 0.443 |
| contig022334-TiITARs.A030 | contig062677-ZebTARs.A018 | 0.242 | 0.546 | 0.443 |
| contig035375-NyeTARs.A013 | contig022345-TiITARs.A034 | 0.265 | 0.599 | 0.443 |
| contig058002-NyeTARs.A025 | contig042499-NyeTARs.A028 | 0.276 | 0.622 | 0.443 |
| contig035376-NyeTARs.A014 | contig066285-ZebTARs.A016 | 0.264 | 0.596 | 0.443 |
| contig049540-BurTARs.A024 | contig065494-BurTARs.A030 | 0.348 | 0.786 | 0.443 |
| contig022382-TiITARs.A053 | contig030464-ZebTARs.A025 | 0.281 | 0.634 | 0.443 |
| contig057301-BurTARs.A017 | contig007524-TiITARs.A026 | 0.280 | 0.631 | 0.443 |
| contig022368-TiITARs.A047 | contig022383-TiITARs.A054 | 0.272 | 0.614 | 0.443 |
| contig057305-BurTARs.A031 | contig007512-TiITARs.A024 | 0.292 | 0.658 | 0.443 |
| contig056200-NyeTARs.A029 | contig030464-ZebTARs.A025 | 0.282 | 0.637 | 0.443 |
| contig029633-BriTAR.A003  | contig084868-BriTARs.A014 | 0.417 | 0.941 | 0.443 |
| contig022349-TiITARs.A035 | contig062676-ZebTARs.A019 | 0.257 | 0.580 | 0.443 |
| contig022343-TiITARs.A033 | contig022356-TiITARs.A040 | 0.127 | 0.287 | 0.443 |
| contig061091-BurTARs.A014 | contig007520-TiITARs.A025 | 0.358 | 0.807 | 0.443 |

|                           |                           |       |       |       |
|---------------------------|---------------------------|-------|-------|-------|
| contig084886-BriTARs.A017 | contig046013-NyeTARs.A021 | 0.158 | 0.357 | 0.443 |
| contig046007-NyeTARs.A017 | contig060105-NyeTARs.A018 | 0.357 | 0.806 | 0.443 |
| contig022355-TiITARs.A039 | contig022375-TiITARs.A048 | 0.150 | 0.337 | 0.443 |
| contig045999-NyeTARs.A026 | contig022375-TiITARs.A048 | 0.198 | 0.447 | 0.444 |
| contig056020-BurTARs.A021 | contig057305-BurTARs.A031 | 0.403 | 0.908 | 0.444 |
| contig062039-NyeTARs.A022 | contig045088-TiITARs.A057 | 0.342 | 0.770 | 0.444 |
| contig086337-BriTARs.A019 | contig022337-TiITARs.A031 | 0.346 | 0.779 | 0.444 |
| contig056200-NyeTARs.A029 | contig022334-TiITARs.A030 | 0.242 | 0.545 | 0.444 |
| contig035377-NyeTARs.A023 | contig061410-ZebTARs.A021 | 0.157 | 0.354 | 0.444 |
| contig084868-BriTARs.A014 | contig040586-ZebTAR.A002  | 0.405 | 0.913 | 0.444 |
| contig060105-NyeTARs.A018 | contig022356-TiITARs.A040 | 0.353 | 0.796 | 0.444 |
| contig035377-NyeTARs.A023 | contig022330-TiITARs.A028 | 0.260 | 0.585 | 0.444 |
| contig038663-NyeTAR.A005  | contig030440-ZebTARs.A029 | 0.409 | 0.921 | 0.444 |
| contig022324-TiITARs.A027 | contig062676-ZebTARs.A019 | 0.259 | 0.585 | 0.444 |
| contig045088-TiITARs.A057 | contig003909-ZebTAR.A003  | 0.411 | 0.925 | 0.444 |
| contig056021-BurTARs.A020 | contig022365-TiITARs.A045 | 0.152 | 0.342 | 0.444 |
| contig022357-TiITARs.A041 | contig066285-ZebTARs.A016 | 0.165 | 0.372 | 0.444 |
| contig034854-BurTARs.A027 | contig038663-NyeTAR.A005  | 0.400 | 0.901 | 0.444 |
| contig084880-BriTARs.A016 | contig066056-ZebTARs.A017 | 0.374 | 0.844 | 0.444 |
| contig022365-TiITARs.A045 | contig061417-ZebTARs.A020 | 0.148 | 0.334 | 0.444 |
| contig059673-BurTARs.A016 | contig022341-TiITARs.A032 | 0.357 | 0.805 | 0.444 |
| contig057148-BurTARs.A028 | contig022354-TiITARs.A037 | 0.189 | 0.426 | 0.444 |
| contig022334-TiITARs.A029 | contig022368-TiITARs.A047 | 0.147 | 0.330 | 0.444 |
| contig038663-NyeTAR.A005  | contig030445-ZebTARs.A026 | 0.396 | 0.892 | 0.444 |
| contig057145-BurTARs.A018 | contig049540-BurTARs.A024 | 0.277 | 0.625 | 0.444 |
| contig022330-TiITARs.A028 | contig022365-TiITARs.A045 | 0.145 | 0.327 | 0.444 |
| contig084886-BriTARs.A017 | contig022355-TiITARs.A039 | 0.137 | 0.308 | 0.444 |
| contig061977-BurTARs.A012 | contig057305-BurTARs.A031 | 0.331 | 0.746 | 0.444 |
| contig057145-BurTARs.A018 | contig062676-ZebTARs.A019 | 0.251 | 0.565 | 0.444 |
| contig038663-NyeTAR.A005  | contig035376-NyeTARs.A014 | 0.412 | 0.927 | 0.444 |
| contig061091-BurTARs.A014 | contig060105-NyeTARs.A018 | 0.346 | 0.779 | 0.444 |
| contig061091-BurTARs.A014 | contig022341-TiITARs.A032 | 0.130 | 0.292 | 0.444 |
| contig041024-BurTARs.A026 | contig007520-TiITARs.A025 | 0.323 | 0.727 | 0.444 |
| contig007518-TiITARs.A019 | contig066890-ZebTARs.A014 | 0.342 | 0.770 | 0.445 |
| contig022330-TiITARs.A028 | contig022377-TiITARs.A050 | 0.141 | 0.318 | 0.445 |
| contig060707-BurTARs.A015 | contig022368-TiITARs.A046 | 0.346 | 0.779 | 0.445 |
| contig041024-BurTARs.A026 | contig035381-NyeTARs.A015 | 0.227 | 0.511 | 0.445 |
| contig022354-TiITARs.A037 | contig030445-ZebTARs.A026 | 0.221 | 0.497 | 0.445 |
| contig046010-NyeTARs.A019 | contig030440-ZebTARs.A029 | 0.261 | 0.587 | 0.445 |
| contig042499-NyeTARs.A028 | contig022363-TiITARs.A043 | 0.408 | 0.919 | 0.445 |
| contig058002-NyeTARs.A025 | contig061417-ZebTARs.A020 | 0.333 | 0.749 | 0.445 |
| contig060292-NyeTARs.A027 | contig022378-TiITARs.A051 | 0.367 | 0.825 | 0.445 |
| contig057148-BurTARs.A028 | contig035375-NyeTARs.A013 | 0.270 | 0.607 | 0.445 |
| contig084887-BriTARs.A018 | contig057145-BurTARs.A018 | 0.124 | 0.278 | 0.445 |
| contig029633-BriTAR.A003  | contig022390-TiITARs.A056 | 0.432 | 0.970 | 0.445 |
| contig022343-TiITARs.A033 | contig022357-TiITARs.A041 | 0.129 | 0.289 | 0.445 |
| contig029633-BriTAR.A003  | contig022345-TiITARs.A034 | 0.432 | 0.970 | 0.445 |
| contig061977-BurTARs.A012 | contig022337-TiITARs.A031 | 0.256 | 0.575 | 0.445 |
| contig007524-TiITARs.A026 | contig045088-TiITARs.A057 | 0.275 | 0.618 | 0.445 |
| contig057145-BurTARs.A018 | contig022349-TiITARs.A035 | 0.151 | 0.340 | 0.445 |
| contig007524-TiITARs.A026 | contig061410-ZebTARs.A021 | 0.314 | 0.706 | 0.445 |
| contig022356-TiITARs.A040 | contig030445-ZebTARs.A026 | 0.237 | 0.534 | 0.445 |
| contig057301-BurTARs.A017 | contig062039-NyeTARs.A022 | 0.348 | 0.781 | 0.445 |

|                           |                           |       |       |       |
|---------------------------|---------------------------|-------|-------|-------|
| contig057305-BurTARs.A031 | contig007524-TiITARs.A026 | 0.261 | 0.587 | 0.445 |
| contig062677-ZebTARs.A018 | contig062676-ZebTARs.A019 | 0.166 | 0.374 | 0.445 |
| contig007518-TiITARs.A019 | contig022354-TiITARs.A038 | 0.375 | 0.842 | 0.445 |
| contig022324-TiITARs.A027 | contig022383-TiITARs.A054 | 0.264 | 0.593 | 0.445 |
| contig022357-TiITARs.A041 | contig022363-TiITARs.A044 | 0.188 | 0.423 | 0.445 |
| contig062039-NyeTARs.A022 | contig058002-NyeTARs.A025 | 0.325 | 0.730 | 0.445 |
| contig022362-TiITARs.A042 | contig062676-ZebTARs.A019 | 0.261 | 0.587 | 0.445 |
| contig029633-BriTAR.A003  | contig066890-ZebTARs.A014 | 0.437 | 0.982 | 0.445 |
| contig086344-BriTARs.A020 | contig007518-TiITARs.A019 | 0.332 | 0.746 | 0.445 |
| contig022363-TiITARs.A043 | contig066285-ZebTARs.A016 | 0.215 | 0.482 | 0.445 |
| contig007518-TiITARs.A019 | contig030445-ZebTARs.A026 | 0.329 | 0.738 | 0.445 |
| contig056021-BurTARs.A020 | contig022379-TiITARs.A052 | 0.239 | 0.536 | 0.445 |
| contig056200-NyeTARs.A029 | contig022378-TiITARs.A051 | 0.256 | 0.574 | 0.446 |
| contig035377-NyeTARs.A023 | contig040586-ZebTAR.A001  | 0.424 | 0.952 | 0.446 |
| contig084876-BriTARs.A015 | contig046014-NyeTARs.A024 | 0.253 | 0.568 | 0.446 |
| contig058002-NyeTARs.A025 | contig030464-ZebTARs.A025 | 0.357 | 0.800 | 0.446 |
| contig082565-BriTARs.A022 | contig022377-TiITARs.A050 | 0.249 | 0.558 | 0.446 |
| contig035375-NyeTARs.A013 | contig007512-TiITARs.A024 | 0.296 | 0.664 | 0.446 |
| contig084880-BriTARs.A016 | contig057145-BurTARs.A018 | 0.195 | 0.438 | 0.446 |
| contig022375-TiITARs.A048 | contig022390-TiITARs.A055 | 0.276 | 0.619 | 0.446 |
| contig022349-TiITARs.A035 | contig022365-TiITARs.A045 | 0.166 | 0.372 | 0.446 |
| contig059673-BurTARs.A016 | contig042499-NyeTARs.A028 | 0.289 | 0.648 | 0.446 |
| contig022353-TiITARs.A036 | contig022356-TiITARs.A040 | 0.113 | 0.253 | 0.446 |
| contig084876-BriTARs.A015 | contig030445-ZebTARs.A026 | 0.135 | 0.302 | 0.446 |
| contig060105-NyeTARs.A018 | contig022355-TiITARs.A039 | 0.341 | 0.765 | 0.446 |
| contig060707-BurTARs.A015 | contig022365-TiITARs.A045 | 0.355 | 0.795 | 0.446 |
| contig049540-BurTARs.A024 | contig030464-ZebTARs.A025 | 0.280 | 0.628 | 0.446 |
| contig061977-BurTARs.A012 | contig022363-TiITARs.A044 | 0.223 | 0.500 | 0.446 |
| contig035375-NyeTARs.A013 | contig060105-NyeTARs.A018 | 0.336 | 0.754 | 0.446 |
| contig046014-NyeTARs.A024 | contig022379-TiITARs.A052 | 0.245 | 0.549 | 0.446 |
| contig060292-NyeTARs.A027 | contig022363-TiITARs.A044 | 0.403 | 0.903 | 0.446 |
| contig022334-TiITARs.A029 | contig022375-TiITARs.A048 | 0.149 | 0.334 | 0.446 |
| contig057301-BurTARs.A017 | contig007520-TiITARs.A025 | 0.276 | 0.619 | 0.446 |
| contig007524-TiITARs.A026 | contig022356-TiITARs.A040 | 0.351 | 0.786 | 0.446 |
| contig022334-TiITARs.A029 | contig022357-TiITARs.A041 | 0.131 | 0.293 | 0.446 |
| contig060292-NyeTARs.A027 | contig007512-TiITARs.A024 | 0.290 | 0.649 | 0.446 |
| contig032272-NyeTAR.A004  | contig042499-NyeTARs.A028 | 0.414 | 0.928 | 0.446 |
| contig046007-NyeTARs.A017 | contig066691-ZebTARs.A015 | 0.090 | 0.201 | 0.446 |
| contig022341-TiITARs.A032 | contig066691-ZebTARs.A015 | 0.133 | 0.298 | 0.447 |
| contig057301-BurTARs.A017 | contig058002-NyeTARs.A025 | 0.288 | 0.645 | 0.447 |
| contig022349-TiITARs.A035 | contig022379-TiITARs.A052 | 0.262 | 0.586 | 0.447 |
| contig058002-NyeTARs.A025 | contig022349-TiITARs.A035 | 0.358 | 0.803 | 0.447 |
| contig086344-BriTARs.A020 | contig030471-ZebTARs.A024 | 0.352 | 0.789 | 0.447 |
| contig084876-BriTARs.A015 | contig035381-NyeTARs.A015 | 0.140 | 0.313 | 0.447 |
| contig041024-BurTARs.A026 | contig022363-TiITARs.A044 | 0.153 | 0.344 | 0.447 |
| contig035377-NyeTARs.A023 | contig046014-NyeTARs.A024 | 0.264 | 0.591 | 0.447 |
| contig035381-NyeTARs.A015 | contig040586-ZebTAR.A001  | 0.399 | 0.892 | 0.447 |
| contig086351-BriTARs.A021 | contig057301-BurTARs.A017 | 0.229 | 0.513 | 0.447 |
| contig049540-BurTARs.A024 | contig066330-ZebTARs.A027 | 0.350 | 0.784 | 0.447 |
| contig022368-TiITARs.A047 | contig030471-ZebTARs.A024 | 0.147 | 0.329 | 0.447 |
| contig086351-BriTARs.A021 | contig022334-TiITARs.A030 | 0.394 | 0.881 | 0.447 |
| contig041024-BurTARs.A026 | contig058002-NyeTARs.A025 | 0.326 | 0.730 | 0.447 |
| contig046010-NyeTARs.A019 | contig062676-ZebTARs.A019 | 0.252 | 0.563 | 0.447 |



|                           |                           |       |       |       |
|---------------------------|---------------------------|-------|-------|-------|
| contig022334-TiITARs.A029 | contig022379-TiITARs.A052 | 0.236 | 0.527 | 0.447 |
| contig049534-BurTARs.A025 | contig062676-ZebTARs.A019 | 0.263 | 0.588 | 0.447 |
| contig022320-TiITARs.A059 | contig062676-ZebTARs.A019 | 0.244 | 0.545 | 0.447 |
| contig066691-ZebTARs.A015 | contig030464-ZebTARs.A025 | 0.163 | 0.365 | 0.447 |
| contig082565-BriTARs.A022 | contig007524-TiITARs.A026 | 0.328 | 0.734 | 0.447 |
| contig022363-TiITARs.A043 | contig045088-TiITARs.A057 | 0.408 | 0.911 | 0.447 |
| contig022356-TiITARs.A040 | contig030440-ZebTARs.A029 | 0.265 | 0.592 | 0.447 |
| contig029633-BriTAR.A003  | contig007518-TiITARs.A019 | 0.496 | 1.110 | 0.447 |
| contig049540-BurTARs.A024 | contig022377-TiITARs.A050 | 0.271 | 0.605 | 0.447 |
| contig007524-TiITARs.A026 | contig022365-TiITARs.A045 | 0.375 | 0.838 | 0.448 |
| contig035377-NyeTARs.A023 | contig066691-ZebTARs.A015 | 0.278 | 0.620 | 0.448 |
| contig060292-NyeTARs.A027 | contig045088-TiITARs.A057 | 0.226 | 0.504 | 0.448 |
| contig056200-NyeTARs.A029 | contig022330-TiITARs.A028 | 0.260 | 0.581 | 0.448 |
| contig084876-BriTARs.A015 | contig041024-BurTARs.A026 | 0.248 | 0.555 | 0.448 |
| contig022349-TiITARs.A035 | contig030440-ZebTARs.A029 | 0.268 | 0.599 | 0.448 |
| contig060292-NyeTARs.A027 | contig042499-NyeTARs.A028 | 0.223 | 0.499 | 0.448 |
| contig022390-TiITARs.A056 | contig066056-ZebTARs.A017 | 0.335 | 0.747 | 0.448 |
| contig059766-BurTARs.A029 | contig062677-ZebTARs.A018 | 0.345 | 0.771 | 0.448 |
| contig035381-NyeTARs.A015 | contig007518-TiITARs.A019 | 0.330 | 0.737 | 0.448 |
| contig039642-TiITAR.A004  | contig022390-TiITARs.A055 | 0.447 | 0.999 | 0.448 |
| contig084876-BriTARs.A015 | contig022334-TiITARs.A029 | 0.243 | 0.542 | 0.448 |
| contig084886-BriTARs.A017 | contig057301-BurTARs.A017 | 0.366 | 0.818 | 0.448 |
| contig061417-ZebTARs.A020 | contig061410-ZebTARs.A021 | 0.239 | 0.535 | 0.448 |
| contig057145-BurTARs.A018 | contig056020-BurTARs.A021 | 0.152 | 0.340 | 0.448 |
| contig022365-TiITARs.A045 | contig066890-ZebTARs.A014 | 0.276 | 0.616 | 0.448 |
| contig022379-TiITARs.A052 | contig030445-ZebTARs.A026 | 0.124 | 0.278 | 0.448 |
| contig058002-NyeTARs.A025 | contig022378-TiITARs.A051 | 0.336 | 0.751 | 0.448 |
| contig057301-BurTARs.A017 | contig022354-TiITARs.A038 | 0.373 | 0.832 | 0.448 |
| contig045302-BurTAR.A001  | contig035377-NyeTARs.A023 | 0.423 | 0.945 | 0.448 |
| contig035377-NyeTARs.A023 | contig022343-TiITARs.A033 | 0.267 | 0.595 | 0.448 |
| contig060292-NyeTARs.A027 | contig007524-TiITARs.A026 | 0.259 | 0.579 | 0.448 |
| contig049540-BurTARs.A024 | contig022355-TiITARs.A039 | 0.279 | 0.623 | 0.448 |
| contig086351-BriTARs.A021 | contig007520-TiITARs.A025 | 0.267 | 0.596 | 0.448 |
| contig045999-NyeTARs.A026 | contig039642-TiITAR.A004  | 0.467 | 1.041 | 0.448 |
| contig061977-BurTARs.A012 | contig062677-ZebTARs.A018 | 0.162 | 0.362 | 0.448 |
| contig022368-TiITARs.A047 | contig066285-ZebTARs.A016 | 0.161 | 0.360 | 0.448 |
| contig035381-NyeTARs.A015 | contig022362-TiITARs.A042 | 0.262 | 0.585 | 0.448 |
| contig007520-TiITARs.A025 | contig022375-TiITARs.A048 | 0.334 | 0.746 | 0.448 |
| contig061977-BurTARs.A012 | contig035376-NyeTARs.A014 | 0.130 | 0.289 | 0.448 |
| contig055697-BurTARs.A022 | contig007518-TiITARs.A019 | 0.302 | 0.673 | 0.448 |
| contig060105-NyeTARs.A018 | contig022363-TiITARs.A044 | 0.356 | 0.793 | 0.448 |
| contig057305-BurTARs.A031 | contig045088-TiITARs.A057 | 0.229 | 0.512 | 0.448 |
| contig022379-TiITARs.A052 | contig059768-ZebTARs.A022 | 0.339 | 0.755 | 0.449 |
| contig022354-TiITARs.A038 | contig022375-TiITARs.A048 | 0.152 | 0.338 | 0.449 |
| contig007518-TiITARs.A019 | contig030471-ZebTARs.A024 | 0.382 | 0.852 | 0.449 |
| contig057305-BurTARs.A031 | contig042499-NyeTARs.A028 | 0.227 | 0.507 | 0.449 |
| contig060105-NyeTARs.A018 | contig022354-TiITARs.A037 | 0.348 | 0.776 | 0.449 |
| contig025313-BriTAR.A002  | contig042499-NyeTARs.A028 | 0.404 | 0.902 | 0.449 |
| contig062677-ZebTARs.A018 | contig053145-ZebTARs.A028 | 0.345 | 0.769 | 0.449 |
| contig084880-BriTARs.A016 | contig022320-TiITARs.A059 | 0.171 | 0.382 | 0.449 |
| contig045302-BurTAR.A001  | contig042499-NyeTARs.A028 | 0.484 | 1.080 | 0.449 |
| contig046007-NyeTARs.A017 | contig022375-TiITARs.A048 | 0.154 | 0.343 | 0.449 |
| contig059673-BurTARs.A016 | contig035377-NyeTARs.A023 | 0.348 | 0.776 | 0.449 |

|                           |                           |       |       |       |
|---------------------------|---------------------------|-------|-------|-------|
| contig022365-TiITARs.A045 | contig022383-TiITARs.A054 | 0.274 | 0.609 | 0.449 |
| contig062039-NyeTARs.A022 | contig007524-TiITARs.A026 | 0.329 | 0.734 | 0.449 |
| contig022382-TiITARs.A053 | contig066330-ZebTARs.A027 | 0.346 | 0.770 | 0.449 |
| contig086337-BriTARs.A019 | contig057301-BurTARs.A017 | 0.289 | 0.643 | 0.449 |
| contig056023-BurTARs.A019 | contig007518-TiITARs.A019 | 0.399 | 0.888 | 0.449 |
| contig022356-TiITARs.A040 | contig022383-TiITARs.A054 | 0.260 | 0.578 | 0.449 |
| contig084868-BriTARs.A014 | contig045302-BurTAR.A001  | 0.420 | 0.936 | 0.449 |
| contig034854-BurTARs.A027 | contig065494-BurTARs.A030 | 0.292 | 0.650 | 0.449 |
| contig022382-TiITARs.A053 | contig061417-ZebTARs.A020 | 0.260 | 0.578 | 0.449 |
| contig022337-TiITARs.A031 | contig053145-ZebTARs.A028 | 0.355 | 0.790 | 0.449 |
| contig045999-NyeTARs.A026 | contig053145-ZebTARs.A028 | 0.407 | 0.905 | 0.449 |
| contig057148-BurTARs.A028 | contig066890-ZebTARs.A014 | 0.271 | 0.602 | 0.449 |
| contig022337-TiITARs.A031 | contig061410-ZebTARs.A021 | 0.258 | 0.575 | 0.449 |
| contig060105-NyeTARs.A018 | contig046013-NyeTARs.A021 | 0.347 | 0.772 | 0.449 |
| contig022354-TiITARs.A038 | contig066890-ZebTARs.A014 | 0.259 | 0.577 | 0.449 |
| contig056020-BurTARs.A021 | contig022343-TiITARs.A033 | 0.115 | 0.256 | 0.449 |
| contig022390-TiITARs.A056 | contig040586-ZebTAR.A001  | 0.426 | 0.947 | 0.449 |
| contig056200-NyeTARs.A029 | contig061417-ZebTARs.A020 | 0.270 | 0.602 | 0.449 |
| contig057145-BurTARs.A018 | contig007512-TiITARs.A024 | 0.355 | 0.789 | 0.450 |
| contig007520-TiITARs.A025 | contig022349-TiITARs.A035 | 0.352 | 0.783 | 0.450 |
| contig084876-BriTARs.A015 | contig035377-NyeTARs.A023 | 0.164 | 0.364 | 0.450 |
| contig034854-BurTARs.A027 | contig066330-ZebTARs.A027 | 0.293 | 0.651 | 0.450 |
| contig086344-BriTARs.A020 | contig022334-TiITARs.A030 | 0.356 | 0.792 | 0.450 |
| contig061410-ZebTARs.A021 | contig030445-ZebTARs.A026 | 0.125 | 0.279 | 0.450 |
| contig046011-NyeTARs.A016 | contig056134-TiITARs.A058 | 0.375 | 0.833 | 0.450 |
| contig060707-BurTARs.A015 | contig022337-TiITARs.A031 | 0.364 | 0.808 | 0.450 |
| contig046013-NyeTARs.A021 | contig046014-NyeTARs.A024 | 0.115 | 0.257 | 0.450 |
| contig022330-TiITARs.A028 | contig022382-TiITARs.A053 | 0.249 | 0.553 | 0.450 |
| contig007520-TiITARs.A025 | contig045088-TiITARs.A057 | 0.275 | 0.611 | 0.450 |
| contig035381-NyeTARs.A015 | contig062676-ZebTARs.A019 | 0.105 | 0.234 | 0.450 |
| contig060105-NyeTARs.A018 | contig022377-TiITARs.A050 | 0.326 | 0.724 | 0.450 |
| contig057305-BurTARs.A031 | contig022365-TiITARs.A045 | 0.425 | 0.944 | 0.450 |
| contig022357-TiITARs.A041 | contig062677-ZebTARs.A018 | 0.293 | 0.652 | 0.450 |
| contig061433-BurTARs.A013 | contig060105-NyeTARs.A018 | 0.347 | 0.771 | 0.450 |
| contig056200-NyeTARs.A029 | contig007520-TiITARs.A025 | 0.333 | 0.739 | 0.450 |
| contig059673-BurTARs.A016 | contig022379-TiITARs.A052 | 0.337 | 0.750 | 0.450 |
| contig022330-TiITARs.A028 | contig066285-ZebTARs.A016 | 0.160 | 0.355 | 0.450 |
| contig057145-BurTARs.A018 | contig062677-ZebTARs.A018 | 0.280 | 0.622 | 0.450 |
| contig062676-ZebTARs.A019 | contig030464-ZebTARs.A025 | 0.259 | 0.576 | 0.450 |
| contig022390-TiITARs.A056 | contig030464-ZebTARs.A025 | 0.272 | 0.603 | 0.450 |
| contig082565-BriTARs.A022 | contig022354-TiITARs.A038 | 0.246 | 0.546 | 0.450 |
| contig084868-BriTARs.A014 | contig046014-NyeTARs.A024 | 0.262 | 0.582 | 0.450 |
| contig022337-TiITARs.A031 | contig022349-TiITARs.A035 | 0.152 | 0.337 | 0.450 |
| contig007520-TiITARs.A025 | contig022353-TiITARs.A036 | 0.382 | 0.848 | 0.450 |
| contig086344-BriTARs.A020 | contig022365-TiITARs.A045 | 0.363 | 0.807 | 0.450 |
| contig022320-TiITARs.A059 | contig030445-ZebTARs.A026 | 0.226 | 0.503 | 0.450 |
| contig007520-TiITARs.A025 | contig022356-TiITARs.A040 | 0.341 | 0.758 | 0.451 |
| contig030464-ZebTARs.A025 | contig030445-ZebTARs.A026 | 0.247 | 0.549 | 0.451 |
| contig049540-BurTARs.A024 | contig045088-TiITARs.A057 | 0.363 | 0.806 | 0.451 |
| contig056021-BurTARs.A020 | contig046014-NyeTARs.A024 | 0.112 | 0.248 | 0.451 |
| contig035381-NyeTARs.A015 | contig061410-ZebTARs.A021 | 0.130 | 0.289 | 0.451 |
| contig061417-ZebTARs.A020 | contig030445-ZebTARs.A026 | 0.236 | 0.524 | 0.451 |
| contig034854-BurTARs.A027 | contig022354-TiITARs.A038 | 0.264 | 0.586 | 0.451 |

|                           |                           |       |       |       |
|---------------------------|---------------------------|-------|-------|-------|
| contig086344-BriTARs.A020 | contig022355-TiITARs.A039 | 0.344 | 0.763 | 0.451 |
| contig022349-TiITARs.A035 | contig066890-ZebTARs.A014 | 0.283 | 0.627 | 0.451 |
| contig061433-BurTARs.A013 | contig022363-TiITARs.A043 | 0.211 | 0.469 | 0.451 |
| contig060292-NyeTARs.A027 | contig062676-ZebTARs.A019 | 0.339 | 0.752 | 0.451 |
| contig038663-NyeTAR.A005  | contig039640-TiITAR.A003  | 0.051 | 0.114 | 0.451 |
| contig061977-BurTARs.A012 | contig061433-BurTARs.A013 | 0.262 | 0.582 | 0.451 |
| contig007524-TiITARs.A026 | contig022345-TiITARs.A034 | 0.332 | 0.737 | 0.451 |
| contig082565-BriTARs.A022 | contig022343-TiITARs.A033 | 0.257 | 0.570 | 0.451 |
| contig061433-BurTARs.A013 | contig059768-ZebTARs.A022 | 0.421 | 0.934 | 0.451 |
| contig057305-BurTARs.A031 | contig022363-TiITARs.A044 | 0.402 | 0.892 | 0.451 |
| contig022354-TiITARs.A037 | contig022354-TiITARs.A038 | 0.182 | 0.403 | 0.451 |
| contig022343-TiITARs.A033 | contig022383-TiITARs.A054 | 0.265 | 0.587 | 0.451 |
| contig007524-TiITARs.A026 | contig022334-TiITARs.A030 | 0.339 | 0.752 | 0.451 |
| contig059673-BurTARs.A016 | contig022356-TiITARs.A040 | 0.360 | 0.798 | 0.451 |
| contig086351-BriTARs.A021 | contig007512-TiITARs.A024 | 0.287 | 0.635 | 0.451 |
| contig061091-BurTARs.A014 | contig022365-TiITARs.A045 | 0.145 | 0.322 | 0.451 |
| contig057305-BurTARs.A031 | contig022368-TiITARs.A047 | 0.421 | 0.933 | 0.451 |
| contig060292-NyeTARs.A027 | contig022368-TiITARs.A047 | 0.421 | 0.933 | 0.451 |
| contig062677-ZebTARs.A018 | contig061410-ZebTARs.A021 | 0.170 | 0.376 | 0.451 |
| contig022357-TiITARs.A041 | contig061410-ZebTARs.A021 | 0.264 | 0.585 | 0.451 |
| contig056021-BurTARs.A020 | contig030445-ZebTARs.A026 | 0.237 | 0.526 | 0.452 |
| contig007518-TiITARs.A019 | contig022362-TiITARs.A042 | 0.381 | 0.844 | 0.452 |
| contig084868-BriTARs.A014 | contig084880-BriTARs.A016 | 0.290 | 0.642 | 0.452 |
| contig056020-BurTARs.A021 | contig022390-TiITARs.A055 | 0.242 | 0.536 | 0.452 |
| contig065494-BurTARs.A030 | contig062677-ZebTARs.A018 | 0.351 | 0.776 | 0.452 |
| contig035377-NyeTARs.A023 | contig022375-TiITARs.A048 | 0.243 | 0.538 | 0.452 |
| contig084868-BriTARs.A014 | contig061433-BurTARs.A013 | 0.285 | 0.630 | 0.452 |
| contig022379-TiITARs.A052 | contig022382-TiITARs.A053 | 0.162 | 0.359 | 0.452 |
| contig057145-BurTARs.A018 | contig056200-NyeTARs.A029 | 0.279 | 0.618 | 0.452 |
| contig029633-BriTAR.A003  | contig039642-TiITAR.A004  | 0.031 | 0.070 | 0.452 |
| contig022378-TiITARs.A051 | contig062676-ZebTARs.A019 | 0.226 | 0.499 | 0.452 |
| contig007520-TiITARs.A025 | contig061417-ZebTARs.A020 | 0.330 | 0.729 | 0.452 |
| contig035381-NyeTARs.A015 | contig022320-TiITARs.A059 | 0.234 | 0.517 | 0.452 |
| contig086344-BriTARs.A020 | contig022368-TiITARs.A046 | 0.357 | 0.790 | 0.452 |
| contig084876-BriTARs.A015 | contig084886-BriTARs.A017 | 0.268 | 0.593 | 0.452 |
| contig007518-TiITARs.A019 | contig022365-TiITARs.A045 | 0.388 | 0.859 | 0.452 |
| contig056200-NyeTARs.A029 | contig022377-TiITARs.A050 | 0.272 | 0.601 | 0.452 |
| contig035376-NyeTARs.A014 | contig022377-TiITARs.A050 | 0.249 | 0.551 | 0.452 |
| contig059673-BurTARs.A016 | contig022354-TiITARs.A038 | 0.359 | 0.794 | 0.452 |
| contig022343-TiITARs.A033 | contig062677-ZebTARs.A018 | 0.285 | 0.631 | 0.452 |
| contig022343-TiITARs.A033 | contig056134-TiITARs.A058 | 0.349 | 0.771 | 0.452 |
| contig007524-TiITARs.A026 | contig022354-TiITARs.A038 | 0.352 | 0.779 | 0.452 |
| contig007518-TiITARs.A019 | contig066330-ZebTARs.A027 | 0.307 | 0.680 | 0.452 |
| contig056021-BurTARs.A020 | contig022349-TiITARs.A035 | 0.151 | 0.334 | 0.452 |
| contig045999-NyeTARs.A026 | contig040586-ZebTAR.A002  | 0.470 | 1.039 | 0.452 |
| contig041024-BurTARs.A026 | contig022353-TiITARs.A036 | 0.121 | 0.267 | 0.452 |
| contig022337-TiITARs.A031 | contig056134-TiITARs.A058 | 0.372 | 0.822 | 0.452 |
| contig022330-TiITARs.A028 | contig022362-TiITARs.A042 | 0.144 | 0.319 | 0.452 |
| contig061433-BurTARs.A013 | contig022353-TiITARs.A036 | 0.177 | 0.391 | 0.453 |
| contig045999-NyeTARs.A026 | contig003909-ZebTAR.A003  | 0.439 | 0.970 | 0.453 |
| contig022345-TiITARs.A034 | contig022362-TiITARs.A042 | 0.142 | 0.315 | 0.453 |
| contig062039-NyeTARs.A022 | contig042499-NyeTARs.A028 | 0.343 | 0.757 | 0.453 |
| contig022320-TiITARs.A059 | contig066890-ZebTARs.A014 | 0.266 | 0.587 | 0.453 |

|                           |                           |       |       |       |
|---------------------------|---------------------------|-------|-------|-------|
| contig057305-BurTARs.A031 | contig035381-NyeTARs.A015 | 0.355 | 0.785 | 0.453 |
| contig061433-BurTARs.A013 | contig022375-TiITARs.A048 | 0.197 | 0.434 | 0.453 |
| contig022330-TiITARs.A028 | contig030445-ZebTARs.A026 | 0.245 | 0.541 | 0.453 |
| contig025313-BriTAR.A002  | contig045999-NyeTARs.A026 | 0.430 | 0.950 | 0.453 |
| contig007520-TiITARs.A025 | contig022320-TiITARs.A059 | 0.329 | 0.726 | 0.453 |
| contig022362-TiITARs.A042 | contig022382-TiITARs.A053 | 0.267 | 0.590 | 0.453 |
| contig084868-BriTARs.A014 | contig038663-NyeTAR.A005  | 0.423 | 0.934 | 0.453 |
| contig084876-BriTARs.A015 | contig007524-TiITARs.A026 | 0.325 | 0.717 | 0.453 |
| contig046014-NyeTARs.A024 | contig022357-TiITARs.A041 | 0.139 | 0.306 | 0.453 |
| contig066285-ZebTARs.A016 | contig062676-ZebTARs.A019 | 0.263 | 0.581 | 0.453 |
| contig035376-NyeTARs.A014 | contig030464-ZebTARs.A025 | 0.258 | 0.569 | 0.453 |
| contig042499-NyeTARs.A028 | contig003909-ZebTAR.A003  | 0.415 | 0.916 | 0.453 |
| contig022365-TiITARs.A045 | contig062676-ZebTARs.A019 | 0.265 | 0.585 | 0.453 |
| contig046013-NyeTARs.A021 | contig022377-TiITARs.A050 | 0.151 | 0.333 | 0.453 |
| contig084880-BriTARs.A016 | contig084886-BriTARs.A017 | 0.193 | 0.426 | 0.453 |
| contig022365-TiITARs.A045 | contig030471-ZebTARs.A024 | 0.147 | 0.323 | 0.453 |
| contig022337-TiITARs.A031 | contig022383-TiITARs.A054 | 0.277 | 0.611 | 0.453 |
| contig049540-BurTARs.A024 | contig022357-TiITARs.A041 | 0.293 | 0.645 | 0.453 |
| contig061091-BurTARs.A014 | contig022354-TiITARs.A038 | 0.145 | 0.320 | 0.453 |
| contig022357-TiITARs.A041 | contig022320-TiITARs.A059 | 0.137 | 0.301 | 0.453 |
| contig022341-TiITARs.A032 | contig022363-TiITARs.A043 | 0.161 | 0.355 | 0.454 |
| contig022357-TiITARs.A041 | contig022368-TiITARs.A046 | 0.149 | 0.328 | 0.454 |
| contig022324-TiITARs.A027 | contig022337-TiITARs.A031 | 0.173 | 0.382 | 0.454 |
| contig022334-TiITARs.A029 | contig022365-TiITARs.A045 | 0.144 | 0.317 | 0.454 |
| contig059766-BurTARs.A029 | contig045999-NyeTARs.A026 | 0.411 | 0.907 | 0.454 |
| contig022368-TiITARs.A046 | contig062676-ZebTARs.A019 | 0.256 | 0.564 | 0.454 |
| contig057305-BurTARs.A031 | contig007518-TiITARs.A019 | 0.282 | 0.621 | 0.454 |
| contig084868-BriTARs.A014 | contig022355-TiITARs.A039 | 0.278 | 0.614 | 0.454 |
| contig046011-NyeTARs.A016 | contig022345-TiITARs.A034 | 0.237 | 0.521 | 0.454 |
| contig007518-TiITARs.A019 | contig022334-TiITARs.A030 | 0.360 | 0.794 | 0.454 |
| contig035377-NyeTARs.A023 | contig007524-TiITARs.A026 | 0.337 | 0.744 | 0.454 |
| contig066691-ZebTARs.A015 | contig061417-ZebTARs.A020 | 0.124 | 0.273 | 0.454 |
| contig022354-TiITARs.A037 | contig066691-ZebTARs.A015 | 0.174 | 0.383 | 0.454 |
| contig084868-BriTARs.A014 | contig022356-TiITARs.A040 | 0.266 | 0.585 | 0.454 |
| contig045302-BurTAR.A001  | contig039640-TiITAR.A002  | 0.072 | 0.159 | 0.454 |
| contig057301-BurTARs.A017 | contig022363-TiITARs.A043 | 0.416 | 0.917 | 0.454 |
| contig065494-BurTARs.A030 | contig035375-NyeTARs.A013 | 0.289 | 0.637 | 0.454 |
| contig061091-BurTARs.A014 | contig035377-NyeTARs.A023 | 0.274 | 0.603 | 0.454 |
| contig057148-BurTARs.A028 | contig066691-ZebTARs.A015 | 0.161 | 0.355 | 0.454 |
| contig035376-NyeTARs.A014 | contig007518-TiITARs.A019 | 0.341 | 0.750 | 0.454 |
| contig059766-BurTARs.A029 | contig056200-NyeTARs.A029 | 0.345 | 0.760 | 0.454 |
| contig022354-TiITARs.A037 | contig066056-ZebTARs.A017 | 0.332 | 0.732 | 0.454 |
| contig007524-TiITARs.A026 | contig022368-TiITARs.A046 | 0.344 | 0.758 | 0.454 |
| contig007512-TiITARs.A024 | contig022337-TiITARs.A031 | 0.369 | 0.812 | 0.454 |
| contig059766-BurTARs.A029 | contig022337-TiITARs.A031 | 0.359 | 0.791 | 0.454 |
| contig084886-BriTARs.A017 | contig062677-ZebTARs.A018 | 0.280 | 0.615 | 0.454 |
| contig007520-TiITARs.A025 | contig066691-ZebTARs.A015 | 0.362 | 0.798 | 0.454 |
| contig056020-BurTARs.A021 | contig022345-TiITARs.A034 | 0.133 | 0.293 | 0.454 |
| contig022354-TiITARs.A037 | contig022363-TiITARs.A044 | 0.127 | 0.280 | 0.454 |
| contig086337-BriTARs.A019 | contig042499-NyeTARs.A028 | 0.285 | 0.626 | 0.454 |
| contig061433-BurTARs.A013 | contig061410-ZebTARs.A021 | 0.261 | 0.574 | 0.454 |
| contig007518-TiITARs.A019 | contig022343-TiITARs.A033 | 0.385 | 0.846 | 0.455 |
| contig084868-BriTARs.A014 | contig062677-ZebTARs.A018 | 0.183 | 0.402 | 0.455 |

|                           |                           |       |       |       |
|---------------------------|---------------------------|-------|-------|-------|
| contig084876-BriTARs.A015 | contig022379-TiITARs.A052 | 0.021 | 0.046 | 0.455 |
| contig060707-BurTARs.A015 | contig022390-TiITARs.A056 | 0.335 | 0.737 | 0.455 |
| contig007524-TiITARs.A026 | contig022378-TiITARs.A051 | 0.338 | 0.744 | 0.455 |
| contig056023-BurTARs.A019 | contig039642-TiITAR.A004  | 0.467 | 1.026 | 0.455 |
| contig056200-NyeTARs.A029 | contig053145-ZebTARs.A028 | 0.345 | 0.759 | 0.455 |
| contig084876-BriTARs.A015 | contig066285-ZebTARs.A016 | 0.275 | 0.605 | 0.455 |
| contig022390-TiITARs.A056 | contig022320-TiITARs.A059 | 0.261 | 0.574 | 0.455 |
| contig065494-BurTARs.A030 | contig022337-TiITARs.A031 | 0.363 | 0.797 | 0.455 |
| contig082565-BriTARs.A022 | contig035381-NyeTARs.A015 | 0.020 | 0.044 | 0.455 |
| contig045999-NyeTARs.A026 | contig007518-TiITARs.A019 | 0.397 | 0.873 | 0.455 |
| contig007524-TiITARs.A026 | contig022379-TiITARs.A052 | 0.310 | 0.681 | 0.455 |
| contig049540-BurTARs.A024 | contig022334-TiITARs.A029 | 0.259 | 0.569 | 0.455 |
| contig007518-TiITARs.A019 | contig022356-TiITARs.A040 | 0.379 | 0.833 | 0.455 |
| contig059673-BurTARs.A016 | contig030445-ZebTARs.A026 | 0.326 | 0.717 | 0.455 |
| contig040586-ZebTAR.A001  | contig066890-ZebTARs.A014 | 0.428 | 0.939 | 0.455 |
| contig060292-NyeTARs.A027 | contig007518-TiITARs.A019 | 0.281 | 0.617 | 0.455 |
| contig061977-BurTARs.A012 | contig022343-TiITARs.A033 | 0.248 | 0.545 | 0.455 |
| contig082565-BriTARs.A022 | contig022378-TiITARs.A051 | 0.220 | 0.484 | 0.455 |
| contig060105-NyeTARs.A018 | contig022368-TiITARs.A046 | 0.354 | 0.777 | 0.455 |
| contig057305-BurTARs.A031 | contig046010-NyeTARs.A019 | 0.415 | 0.911 | 0.455 |
| contig086344-BriTARs.A020 | contig022390-TiITARs.A056 | 0.338 | 0.743 | 0.455 |
| contig007524-TiITARs.A026 | contig022362-TiITARs.A042 | 0.343 | 0.753 | 0.455 |
| contig057145-BurTARs.A018 | contig046013-NyeTARs.A021 | 0.131 | 0.288 | 0.455 |
| contig057148-BurTARs.A028 | contig046013-NyeTARs.A021 | 0.158 | 0.347 | 0.455 |
| contig022334-TiITARs.A029 | contig022341-TiITARs.A032 | 0.128 | 0.282 | 0.455 |
| contig007518-TiITARs.A019 | contig007520-TiITARs.A025 | 0.255 | 0.561 | 0.455 |
| contig049540-BurTARs.A024 | contig022343-TiITARs.A033 | 0.283 | 0.622 | 0.455 |
| contig060707-BurTARs.A015 | contig056020-BurTARs.A021 | 0.382 | 0.839 | 0.455 |
| contig056021-BurTARs.A020 | contig059768-ZebTARs.A022 | 0.368 | 0.808 | 0.455 |
| contig022324-TiITARs.A027 | contig022343-TiITARs.A033 | 0.164 | 0.361 | 0.455 |
| contig062677-ZebTARs.A018 | contig066330-ZebTARs.A027 | 0.352 | 0.774 | 0.456 |
| contig022334-TiITARs.A030 | contig022363-TiITARs.A044 | 0.136 | 0.298 | 0.456 |
| contig045088-TiITARs.A057 | contig062677-ZebTARs.A018 | 0.369 | 0.809 | 0.456 |
| contig084887-BriTARs.A018 | contig035377-NyeTARs.A023 | 0.277 | 0.607 | 0.456 |
| contig084876-BriTARs.A015 | contig022349-TiITARs.A035 | 0.266 | 0.584 | 0.456 |
| contig022324-TiITARs.A027 | contig022378-TiITARs.A051 | 0.265 | 0.582 | 0.456 |
| contig057145-BurTARs.A018 | contig046011-NyeTARs.A016 | 0.242 | 0.531 | 0.456 |
| contig022337-TiITARs.A031 | contig061417-ZebTARs.A020 | 0.122 | 0.267 | 0.456 |
| contig054630-BurTARs.A023 | contig022379-TiITARs.A052 | 0.345 | 0.757 | 0.456 |
| contig035375-NyeTARs.A013 | contig022337-TiITARs.A031 | 0.270 | 0.593 | 0.456 |
| contig046011-NyeTARs.A016 | contig022357-TiITARs.A041 | 0.245 | 0.537 | 0.456 |
| contig022320-TiITARs.A059 | contig030471-ZebTARs.A024 | 0.066 | 0.144 | 0.456 |
| contig049540-BurTARs.A024 | contig058002-NyeTARs.A025 | 0.334 | 0.732 | 0.456 |
| contig082565-BriTARs.A022 | contig022337-TiITARs.A031 | 0.266 | 0.583 | 0.456 |
| contig056023-BurTARs.A019 | contig022375-TiITARs.A048 | 0.199 | 0.437 | 0.456 |
| contig041024-BurTARs.A026 | contig046013-NyeTARs.A021 | 0.119 | 0.261 | 0.456 |
| contig084876-BriTARs.A015 | contig056021-BurTARs.A020 | 0.248 | 0.544 | 0.456 |
| contig022330-TiITARs.A028 | contig022357-TiITARs.A041 | 0.136 | 0.298 | 0.456 |
| contig084880-BriTARs.A016 | contig053145-ZebTARs.A028 | 0.404 | 0.885 | 0.456 |
| contig056021-BurTARs.A020 | contig054630-BurTARs.A023 | 0.375 | 0.821 | 0.456 |
| contig058002-NyeTARs.A025 | contig022382-TiITARs.A053 | 0.322 | 0.705 | 0.456 |
| contig035377-NyeTARs.A023 | contig030464-ZebTARs.A025 | 0.274 | 0.600 | 0.456 |
| contig084886-BriTARs.A017 | contig022362-TiITARs.A042 | 0.166 | 0.363 | 0.456 |

|                           |                           |       |       |       |
|---------------------------|---------------------------|-------|-------|-------|
| contig049540-BurTARs.A024 | contig022362-TiITARs.A042 | 0.268 | 0.588 | 0.456 |
| contig084876-BriTARs.A015 | contig057305-BurTARs.A031 | 0.334 | 0.733 | 0.456 |
| contig022330-TiITARs.A028 | contig022363-TiITARs.A043 | 0.170 | 0.371 | 0.456 |
| contig022379-TiITARs.A052 | contig022320-TiITARs.A059 | 0.243 | 0.533 | 0.457 |
| contig046010-NyeTARs.A019 | contig035377-NyeTARs.A023 | 0.267 | 0.584 | 0.457 |
| contig082565-BriTARs.A022 | contig038663-NyeTAR.A005  | 0.401 | 0.879 | 0.457 |
| contig086351-BriTARs.A021 | contig022363-TiITARs.A044 | 0.407 | 0.892 | 0.457 |
| contig046013-NyeTARs.A021 | contig022320-TiITARs.A059 | 0.124 | 0.272 | 0.457 |
| contig020038-BurTAR.A002  | contig057301-BurTARs.A017 | 0.412 | 0.902 | 0.457 |
| contig035375-NyeTARs.A013 | contig066330-ZebTARs.A027 | 0.290 | 0.636 | 0.457 |
| contig056021-BurTARs.A020 | contig022383-TiITARs.A054 | 0.257 | 0.564 | 0.457 |
| contig022368-TiITARs.A047 | contig022377-TiITARs.A050 | 0.144 | 0.315 | 0.457 |
| contig057301-BurTARs.A017 | contig022377-TiITARs.A050 | 0.368 | 0.806 | 0.457 |
| contig058002-NyeTARs.A025 | contig022353-TiITARs.A036 | 0.383 | 0.839 | 0.457 |
| contig061977-BurTARs.A012 | contig022377-TiITARs.A050 | 0.243 | 0.531 | 0.457 |
| contig061433-BurTARs.A013 | contig022390-TiITARs.A055 | 0.340 | 0.744 | 0.457 |
| contig022345-TiITARs.A034 | contig022355-TiITARs.A039 | 0.126 | 0.276 | 0.457 |
| contig086344-BriTARs.A020 | contig046007-NyeTARs.A017 | 0.366 | 0.801 | 0.457 |
| contig056023-BurTARs.A019 | contig022341-TiITARs.A032 | 0.186 | 0.407 | 0.457 |
| contig049534-BurTARs.A025 | contig060292-NyeTARs.A027 | 0.446 | 0.976 | 0.457 |
| contig035376-NyeTARs.A014 | contig022356-TiITARs.A040 | 0.253 | 0.553 | 0.457 |
| contig046013-NyeTARs.A021 | contig022343-TiITARs.A033 | 0.107 | 0.233 | 0.457 |
| contig057145-BurTARs.A018 | contig022382-TiITARs.A053 | 0.269 | 0.590 | 0.457 |
| contig060707-BurTARs.A015 | contig022354-TiITARs.A037 | 0.340 | 0.743 | 0.457 |
| contig066056-ZebTARs.A017 | contig061417-ZebTARs.A020 | 0.329 | 0.719 | 0.457 |
| contig084868-BriTARs.A014 | contig084886-BriTARs.A017 | 0.275 | 0.601 | 0.457 |
| contig045302-BurTAR.A001  | contig022390-TiITARs.A056 | 0.429 | 0.939 | 0.457 |
| contig035381-NyeTARs.A015 | contig060292-NyeTARs.A027 | 0.356 | 0.779 | 0.457 |
| contig022363-TiITARs.A044 | contig061410-ZebTARs.A021 | 0.226 | 0.493 | 0.457 |
| contig084876-BriTARs.A015 | contig022320-TiITARs.A059 | 0.251 | 0.548 | 0.457 |
| contig035377-NyeTARs.A023 | contig022324-TiITARs.A027 | 0.281 | 0.614 | 0.457 |
| contig039642-TiITAR.A004  | contig040586-ZebTAR.A001  | 0.063 | 0.137 | 0.457 |
| contig084876-BriTARs.A015 | contig022368-TiITARs.A047 | 0.264 | 0.578 | 0.457 |
| contig082565-BriTARs.A022 | contig022356-TiITARs.A040 | 0.251 | 0.549 | 0.457 |
| contig046010-NyeTARs.A019 | contig022354-TiITARs.A037 | 0.193 | 0.421 | 0.457 |
| contig056200-NyeTARs.A029 | contig022355-TiITARs.A039 | 0.281 | 0.615 | 0.457 |
| contig061977-BurTARs.A012 | contig022324-TiITARs.A027 | 0.255 | 0.557 | 0.457 |
| contig045302-BurTAR.A001  | contig066890-ZebTARs.A014 | 0.426 | 0.932 | 0.457 |
| contig029633-BriTAR.A003  | contig040586-ZebTAR.A002  | 0.020 | 0.043 | 0.458 |
| contig058002-NyeTARs.A025 | contig022354-TiITARs.A037 | 0.335 | 0.732 | 0.458 |
| contig022363-TiITARs.A043 | contig022368-TiITARs.A047 | 0.124 | 0.271 | 0.458 |
| contig007524-TiITARs.A026 | contig022337-TiITARs.A031 | 0.359 | 0.784 | 0.458 |
| contig022365-TiITARs.A045 | contig066691-ZebTARs.A015 | 0.148 | 0.324 | 0.458 |
| contig057145-BurTARs.A018 | contig035375-NyeTARs.A013 | 0.274 | 0.599 | 0.458 |
| contig034854-BurTARs.A027 | contig007520-TiITARs.A025 | 0.345 | 0.753 | 0.458 |
| contig038663-NyeTAR.A005  | contig039642-TiITAR.A004  | 0.063 | 0.137 | 0.458 |
| contig049534-BurTARs.A025 | contig022382-TiITARs.A053 | 0.293 | 0.639 | 0.458 |
| contig057145-BurTARs.A018 | contig007518-TiITARs.A019 | 0.381 | 0.831 | 0.458 |
| contig061433-BurTARs.A013 | contig022383-TiITARs.A054 | 0.271 | 0.593 | 0.458 |
| contig007524-TiITARs.A026 | contig030445-ZebTARs.A026 | 0.319 | 0.697 | 0.458 |
| contig049534-BurTARs.A025 | contig022390-TiITARs.A056 | 0.272 | 0.595 | 0.458 |
| contig065494-BurTARs.A030 | contig056200-NyeTARs.A029 | 0.351 | 0.765 | 0.458 |
| contig057301-BurTARs.A017 | contig062677-ZebTARs.A018 | 0.365 | 0.796 | 0.458 |

|                           |                           |       |       |       |
|---------------------------|---------------------------|-------|-------|-------|
| contig022379-TiITARs.A052 | contig062677-ZebTARs.A018 | 0.173 | 0.377 | 0.458 |
| contig042499-NyeTARs.A028 | contig022362-TiITARs.A042 | 0.360 | 0.786 | 0.458 |
| contig084880-BriTARs.A016 | contig022354-TiITARs.A037 | 0.225 | 0.490 | 0.458 |
| contig022382-TiITARs.A053 | contig066285-ZebTARs.A016 | 0.293 | 0.640 | 0.458 |
| contig022379-TiITARs.A052 | contig061417-ZebTARs.A020 | 0.241 | 0.526 | 0.458 |
| contig058002-NyeTARs.A025 | contig022320-TiITARs.A059 | 0.334 | 0.728 | 0.458 |
| contig084887-BriTARs.A018 | contig007520-TiITARs.A025 | 0.352 | 0.769 | 0.458 |
| contig055697-BurTARs.A022 | contig045088-TiITARs.A057 | 0.283 | 0.618 | 0.458 |
| contig039640-TiITAR.A002  | contig040586-ZebTAR.A001  | 0.069 | 0.151 | 0.458 |
| contig060105-NyeTARs.A018 | contig022365-TiITARs.A045 | 0.361 | 0.787 | 0.458 |
| contig041024-BurTARs.A026 | contig062039-NyeTARs.A022 | 0.253 | 0.553 | 0.458 |
| contig084876-BriTARs.A015 | contig062039-NyeTARs.A022 | 0.210 | 0.458 | 0.458 |
| contig057305-BurTARs.A031 | contig062676-ZebTARs.A019 | 0.338 | 0.737 | 0.459 |
| contig022362-TiITARs.A042 | contig045088-TiITARs.A057 | 0.363 | 0.790 | 0.459 |
| contig007518-TiITARs.A019 | contig022330-TiITARs.A028 | 0.385 | 0.839 | 0.459 |
| contig057301-BurTARs.A017 | contig022362-TiITARs.A042 | 0.365 | 0.796 | 0.459 |
| contig061433-BurTARs.A013 | contig022334-TiITARs.A029 | 0.160 | 0.348 | 0.459 |
| contig022357-TiITARs.A041 | contig022365-TiITARs.A045 | 0.146 | 0.319 | 0.459 |
| contig046007-NyeTARs.A017 | contig022343-TiITARs.A033 | 0.119 | 0.260 | 0.459 |
| contig022363-TiITARs.A044 | contig022377-TiITARs.A050 | 0.182 | 0.398 | 0.459 |
| contig035381-NyeTARs.A015 | contig022375-TiITARs.A048 | 0.216 | 0.471 | 0.459 |
| contig086351-BriTARs.A021 | contig022368-TiITARs.A047 | 0.429 | 0.934 | 0.459 |
| contig022334-TiITARs.A029 | contig030445-ZebTARs.A026 | 0.245 | 0.534 | 0.459 |
| contig061977-BurTARs.A012 | contig030440-ZebTARs.A029 | 0.132 | 0.288 | 0.459 |
| contig084880-BriTARs.A016 | contig022345-TiITARs.A034 | 0.187 | 0.408 | 0.459 |
| contig060707-BurTARs.A015 | contig042499-NyeTARs.A028 | 0.317 | 0.692 | 0.459 |
| contig086351-BriTARs.A021 | contig022378-TiITARs.A051 | 0.366 | 0.797 | 0.459 |
| contig062039-NyeTARs.A022 | contig066285-ZebTARs.A016 | 0.264 | 0.576 | 0.459 |
| contig042499-NyeTARs.A028 | contig066691-ZebTARs.A015 | 0.354 | 0.770 | 0.459 |
| contig060105-NyeTARs.A018 | contig022337-TiITARs.A031 | 0.367 | 0.800 | 0.459 |
| contig046010-NyeTARs.A019 | contig030445-ZebTARs.A026 | 0.245 | 0.534 | 0.459 |
| contig020038-BurTAR.A002  | contig045088-TiITARs.A057 | 0.412 | 0.898 | 0.459 |
| contig060292-NyeTARs.A027 | contig022365-TiITARs.A045 | 0.428 | 0.931 | 0.459 |
| contig056023-BurTARs.A019 | contig040586-ZebTAR.A002  | 0.470 | 1.024 | 0.459 |
| contig049534-BurTARs.A025 | contig066890-ZebTARs.A014 | 0.282 | 0.614 | 0.459 |
| contig056021-BurTARs.A020 | contig046013-NyeTARs.A021 | 0.126 | 0.275 | 0.459 |
| contig056023-BurTARs.A019 | contig053145-ZebTARs.A028 | 0.404 | 0.880 | 0.459 |
| contig022377-TiITARs.A050 | contig022390-TiITARs.A055 | 0.232 | 0.506 | 0.459 |
| contig049534-BurTARs.A025 | contig035375-NyeTARs.A013 | 0.292 | 0.636 | 0.459 |
| contig032272-NyeTAR.A004  | contig045999-NyeTARs.A026 | 0.439 | 0.956 | 0.459 |
| contig035376-NyeTARs.A014 | contig022343-TiITARs.A033 | 0.257 | 0.558 | 0.460 |
| contig084880-BriTARs.A016 | contig059673-BurTARs.A016 | 0.392 | 0.853 | 0.460 |
| contig022334-TiITARs.A029 | contig022343-TiITARs.A033 | 0.107 | 0.233 | 0.460 |
| contig056021-BurTARs.A020 | contig022377-TiITARs.A050 | 0.143 | 0.312 | 0.460 |
| contig059673-BurTARs.A016 | contig035376-NyeTARs.A014 | 0.332 | 0.723 | 0.460 |
| contig007520-TiITARs.A025 | contig022377-TiITARs.A050 | 0.349 | 0.759 | 0.460 |
| contig022355-TiITARs.A039 | contig022383-TiITARs.A054 | 0.269 | 0.586 | 0.460 |
| contig035376-NyeTARs.A014 | contig022337-TiITARs.A031 | 0.264 | 0.575 | 0.460 |
| contig086351-BriTARs.A021 | contig061410-ZebTARs.A021 | 0.323 | 0.703 | 0.460 |
| contig022337-TiITARs.A031 | contig062677-ZebTARs.A018 | 0.298 | 0.648 | 0.460 |
| contig022383-TiITARs.A054 | contig030445-ZebTARs.A026 | 0.109 | 0.238 | 0.460 |
| contig056200-NyeTARs.A029 | contig022362-TiITARs.A042 | 0.270 | 0.588 | 0.460 |
| contig049540-BurTARs.A024 | contig062676-ZebTARs.A019 | 0.166 | 0.362 | 0.460 |

|                           |                           |       |       |       |
|---------------------------|---------------------------|-------|-------|-------|
| contig022377-TiITARs.A050 | contig062676-ZebTARs.A019 | 0.245 | 0.534 | 0.460 |
| contig046014-NyeTARs.A024 | contig022383-TiITARs.A054 | 0.250 | 0.544 | 0.460 |
| contig062039-NyeTARs.A022 | contig022354-TiITARs.A037 | 0.235 | 0.512 | 0.460 |
| contig084868-BriTARs.A014 | contig022354-TiITARs.A037 | 0.241 | 0.523 | 0.460 |
| contig082565-BriTARs.A022 | contig030464-ZebTARs.A025 | 0.258 | 0.560 | 0.460 |
| contig056200-NyeTARs.A029 | contig022334-TiITARs.A029 | 0.260 | 0.565 | 0.460 |
| contig084868-BriTARs.A014 | contig045999-NyeTARs.A026 | 0.290 | 0.631 | 0.460 |
| contig056200-NyeTARs.A029 | contig045088-TiITARs.A057 | 0.361 | 0.785 | 0.460 |
| contig049534-BurTARs.A025 | contig022363-TiITARs.A043 | 0.217 | 0.471 | 0.460 |
| contig059673-BurTARs.A016 | contig066890-ZebTARs.A014 | 0.350 | 0.760 | 0.460 |
| contig022378-TiITARs.A051 | contig022382-TiITARs.A053 | 0.245 | 0.532 | 0.460 |
| contig056020-BurTARs.A021 | contig022362-TiITARs.A042 | 0.154 | 0.335 | 0.460 |
| contig035381-NyeTARs.A015 | contig022378-TiITARs.A051 | 0.217 | 0.471 | 0.460 |
| contig061091-BurTARs.A014 | contig022354-TiITARs.A037 | 0.170 | 0.370 | 0.460 |
| contig059673-BurTARs.A016 | contig022377-TiITARs.A050 | 0.362 | 0.786 | 0.460 |
| contig022337-TiITARs.A031 | contig066330-ZebTARs.A027 | 0.365 | 0.793 | 0.460 |
| contig084887-BriTARs.A018 | contig042499-NyeTARs.A028 | 0.342 | 0.743 | 0.460 |
| contig042499-NyeTARs.A028 | contig007524-TiITARs.A026 | 0.282 | 0.612 | 0.460 |
| contig082565-BriTARs.A022 | contig045088-TiITARs.A057 | 0.351 | 0.762 | 0.460 |
| contig060707-BurTARs.A015 | contig022357-TiITARs.A041 | 0.353 | 0.766 | 0.461 |
| contig084868-BriTARs.A014 | contig022378-TiITARs.A051 | 0.239 | 0.520 | 0.461 |
| contig084868-BriTARs.A014 | contig049540-BurTARs.A024 | 0.184 | 0.399 | 0.461 |
| contig007518-TiITARs.A019 | contig022363-TiITARs.A044 | 0.369 | 0.801 | 0.461 |
| contig045999-NyeTARs.A026 | contig022377-TiITARs.A050 | 0.166 | 0.361 | 0.461 |
| contig022368-TiITARs.A047 | contig022379-TiITARs.A052 | 0.256 | 0.556 | 0.461 |
| contig041024-BurTARs.A026 | contig062676-ZebTARs.A019 | 0.247 | 0.537 | 0.461 |
| contig035381-NyeTARs.A015 | contig022355-TiITARs.A039 | 0.255 | 0.554 | 0.461 |
| contig046007-NyeTARs.A017 | contig046013-NyeTARs.A021 | 0.090 | 0.195 | 0.461 |
| contig086337-BriTARs.A019 | contig045088-TiITARs.A057 | 0.289 | 0.626 | 0.461 |
| contig038663-NyeTAR.A005  | contig035377-NyeTARs.A023 | 0.432 | 0.938 | 0.461 |
| contig022368-TiITARs.A046 | contig030471-ZebTARs.A024 | 0.128 | 0.278 | 0.461 |
| contig086344-BriTARs.A020 | contig022357-TiITARs.A041 | 0.356 | 0.772 | 0.461 |
| contig041024-BurTARs.A026 | contig022349-TiITARs.A035 | 0.140 | 0.303 | 0.461 |
| contig061091-BurTARs.A014 | contig042499-NyeTARs.A028 | 0.349 | 0.756 | 0.461 |
| contig084876-BriTARs.A015 | contig060292-NyeTARs.A027 | 0.336 | 0.728 | 0.461 |
| contig022324-TiITARs.A027 | contig061410-ZebTARs.A021 | 0.253 | 0.549 | 0.461 |
| contig035381-NyeTARs.A015 | contig022368-TiITARs.A047 | 0.270 | 0.586 | 0.461 |
| contig084887-BriTARs.A018 | contig022368-TiITARs.A047 | 0.155 | 0.337 | 0.461 |
| contig035377-NyeTARs.A023 | contig022363-TiITARs.A043 | 0.324 | 0.703 | 0.461 |
| contig056200-NyeTARs.A029 | contig022357-TiITARs.A041 | 0.294 | 0.638 | 0.461 |
| contig084880-BriTARs.A016 | contig035377-NyeTARs.A023 | 0.283 | 0.613 | 0.461 |
| contig007524-TiITARs.A026 | contig022354-TiITARs.A037 | 0.335 | 0.725 | 0.461 |
| contig022349-TiITARs.A035 | contig061417-ZebTARs.A020 | 0.152 | 0.330 | 0.461 |
| contig057301-BurTARs.A017 | contig049540-BurTARs.A024 | 0.366 | 0.792 | 0.461 |
| contig061091-BurTARs.A014 | contig058002-NyeTARs.A025 | 0.359 | 0.778 | 0.462 |
| contig062039-NyeTARs.A022 | contig022345-TiITARs.A034 | 0.255 | 0.552 | 0.462 |
| contig045999-NyeTARs.A026 | contig022354-TiITARs.A037 | 0.224 | 0.485 | 0.462 |
| contig057301-BurTARs.A017 | contig060292-NyeTARs.A027 | 0.230 | 0.499 | 0.462 |
| contig049534-BurTARs.A025 | contig030440-ZebTARs.A029 | 0.283 | 0.613 | 0.462 |
| contig035376-NyeTARs.A014 | contig046010-NyeTARs.A019 | 0.256 | 0.554 | 0.462 |
| contig084876-BriTARs.A015 | contig022368-TiITARs.A046 | 0.253 | 0.549 | 0.462 |
| contig022363-TiITARs.A044 | contig066890-ZebTARs.A014 | 0.240 | 0.520 | 0.462 |
| contig034854-BurTARs.A027 | contig022379-TiITARs.A052 | 0.154 | 0.335 | 0.462 |



|                           |                           |       |       |       |
|---------------------------|---------------------------|-------|-------|-------|
| contig022368-TiITARs.A047 | contig045088-TiITARs.A057 | 0.393 | 0.851 | 0.462 |
| contig022365-TiITARs.A045 | contig022390-TiITARs.A056 | 0.268 | 0.581 | 0.462 |
| contig084886-BriTARs.A017 | contig022365-TiITARs.A045 | 0.152 | 0.329 | 0.462 |
| contig056200-NyeTARs.A029 | contig066330-ZebTARs.A027 | 0.352 | 0.763 | 0.462 |
| contig022330-TiITARs.A028 | contig022343-TiITARs.A033 | 0.117 | 0.253 | 0.462 |
| contig084868-BriTARs.A014 | contig022343-TiITARs.A033 | 0.271 | 0.586 | 0.462 |
| contig045088-TiITARs.A057 | contig066691-ZebTARs.A015 | 0.359 | 0.776 | 0.462 |
| contig022334-TiITARs.A030 | contig022365-TiITARs.A045 | 0.191 | 0.414 | 0.462 |
| contig058002-NyeTARs.A025 | contig022356-TiITARs.A040 | 0.347 | 0.750 | 0.462 |
| contig007518-TiITARs.A019 | contig022390-TiITARs.A056 | 0.351 | 0.760 | 0.462 |
| contig057301-BurTARs.A017 | contig057305-BurTARs.A031 | 0.234 | 0.506 | 0.462 |
| contig046014-NyeTARs.A024 | contig061417-ZebTARs.A020 | 0.112 | 0.242 | 0.463 |
| contig022354-TiITARs.A037 | contig022365-TiITARs.A045 | 0.178 | 0.385 | 0.463 |
| contig082565-BriTARs.A022 | contig022330-TiITARs.A028 | 0.256 | 0.553 | 0.463 |
| contig041024-BurTARs.A026 | contig045999-NyeTARs.A026 | 0.174 | 0.376 | 0.463 |
| contig049540-BurTARs.A024 | contig042499-NyeTARs.A028 | 0.364 | 0.786 | 0.463 |
| contig022334-TiITARs.A029 | contig022382-TiITARs.A053 | 0.249 | 0.538 | 0.463 |
| contig045999-NyeTARs.A026 | contig022320-TiITARs.A059 | 0.173 | 0.375 | 0.463 |
| contig007518-TiITARs.A019 | contig022334-TiITARs.A029 | 0.384 | 0.830 | 0.463 |
| contig007518-TiITARs.A019 | contig066285-ZebTARs.A016 | 0.401 | 0.866 | 0.463 |
| contig035375-NyeTARs.A013 | contig022354-TiITARs.A038 | 0.263 | 0.569 | 0.463 |
| contig022334-TiITARs.A029 | contig022363-TiITARs.A043 | 0.164 | 0.354 | 0.463 |
| contig057301-BurTARs.A017 | contig053139-ZebTARs.A023 | 0.294 | 0.634 | 0.463 |
| contig086344-BriTARs.A020 | contig066056-ZebTARs.A017 | 0.027 | 0.059 | 0.463 |
| contig022383-TiITARs.A054 | contig061417-ZebTARs.A020 | 0.260 | 0.561 | 0.463 |
| contig035375-NyeTARs.A013 | contig066285-ZebTARs.A016 | 0.293 | 0.633 | 0.463 |
| contig086351-BriTARs.A021 | contig022365-TiITARs.A045 | 0.430 | 0.929 | 0.463 |
| contig084868-BriTARs.A014 | contig022375-TiITARs.A048 | 0.242 | 0.523 | 0.463 |
| contig049540-BurTARs.A024 | contig022337-TiITARs.A031 | 0.296 | 0.639 | 0.463 |
| contig046013-NyeTARs.A021 | contig022330-TiITARs.A028 | 0.125 | 0.270 | 0.463 |
| contig084876-BriTARs.A015 | contig049534-BurTARs.A025 | 0.276 | 0.595 | 0.463 |
| contig058002-NyeTARs.A025 | contig022363-TiITARs.A044 | 0.357 | 0.771 | 0.463 |
| contig060707-BurTARs.A015 | contig057301-BurTARs.A017 | 0.320 | 0.690 | 0.463 |
| contig055697-BurTARs.A022 | contig042499-NyeTARs.A028 | 0.281 | 0.606 | 0.463 |
| contig022324-TiITARs.A027 | contig022379-TiITARs.A052 | 0.269 | 0.580 | 0.463 |
| contig057305-BurTARs.A031 | contig030445-ZebTARs.A026 | 0.352 | 0.759 | 0.463 |
| contig007524-TiITARs.A026 | contig022368-TiITARs.A047 | 0.362 | 0.782 | 0.463 |
| contig058002-NyeTARs.A025 | contig062677-ZebTARs.A018 | 0.335 | 0.724 | 0.463 |
| contig022343-TiITARs.A033 | contig022377-TiITARs.A050 | 0.129 | 0.279 | 0.463 |
| contig084880-BriTARs.A016 | contig041024-BurTARs.A026 | 0.172 | 0.372 | 0.463 |
| contig082565-BriTARs.A022 | contig022354-TiITARs.A037 | 0.230 | 0.497 | 0.463 |
| contig057148-BurTARs.A028 | contig022375-TiITARs.A048 | 0.163 | 0.352 | 0.463 |
| contig084887-BriTARs.A018 | contig045088-TiITARs.A057 | 0.347 | 0.749 | 0.464 |
| contig045088-TiITARs.A057 | contig053139-ZebTARs.A023 | 0.292 | 0.631 | 0.464 |
| contig022345-TiITARs.A034 | contig022357-TiITARs.A041 | 0.149 | 0.322 | 0.464 |
| contig049534-BurTARs.A025 | contig057305-BurTARs.A031 | 0.446 | 0.962 | 0.464 |
| contig022343-TiITARs.A033 | contig022355-TiITARs.A039 | 0.108 | 0.233 | 0.464 |
| contig058002-NyeTARs.A025 | contig056200-NyeTARs.A029 | 0.336 | 0.724 | 0.464 |
| contig042499-NyeTARs.A028 | contig007520-TiITARs.A025 | 0.279 | 0.601 | 0.464 |
| contig041024-BurTARs.A026 | contig035376-NyeTARs.A014 | 0.234 | 0.504 | 0.464 |
| contig022363-TiITARs.A044 | contig030445-ZebTARs.A026 | 0.229 | 0.493 | 0.464 |
| contig084886-BriTARs.A017 | contig022382-TiITARs.A053 | 0.275 | 0.592 | 0.464 |
| contig022324-TiITARs.A027 | contig062677-ZebTARs.A018 | 0.304 | 0.656 | 0.464 |

|                           |                           |       |       |       |
|---------------------------|---------------------------|-------|-------|-------|
| contig059673-BurTARs.A016 | contig049534-BurTARs.A025 | 0.380 | 0.819 | 0.464 |
| contig056023-BurTARs.A019 | contig059766-BurTARs.A029 | 0.409 | 0.882 | 0.464 |
| contig084880-BriTARs.A016 | contig022383-TiITARs.A054 | 0.274 | 0.591 | 0.464 |
| contig061977-BurTARs.A012 | contig022382-TiITARs.A053 | 0.152 | 0.327 | 0.464 |
| contig056023-BurTARs.A019 | contig022354-TiITARs.A038 | 0.185 | 0.398 | 0.464 |
| contig061091-BurTARs.A014 | contig045088-TiITARs.A057 | 0.354 | 0.762 | 0.464 |
| contig061433-BurTARs.A013 | contig022379-TiITARs.A052 | 0.275 | 0.593 | 0.464 |
| contig084868-BriTARs.A014 | contig022337-TiITARs.A031 | 0.283 | 0.610 | 0.464 |
| contig086351-BriTARs.A021 | contig030464-ZebTARs.A025 | 0.415 | 0.895 | 0.464 |
| contig084868-BriTARs.A014 | contig056021-BurTARs.A020 | 0.270 | 0.582 | 0.464 |
| contig062039-NyeTARs.A022 | contig022324-TiITARs.A027 | 0.276 | 0.595 | 0.464 |
| contig049534-BurTARs.A025 | contig062039-NyeTARs.A022 | 0.264 | 0.568 | 0.464 |
| contig042499-NyeTARs.A028 | contig022377-TiITARs.A050 | 0.375 | 0.807 | 0.464 |
| contig022343-TiITARs.A033 | contig022365-TiITARs.A045 | 0.144 | 0.309 | 0.464 |
| contig084887-BriTARs.A018 | contig058002-NyeTARs.A025 | 0.353 | 0.761 | 0.464 |
| contig084876-BriTARs.A015 | contig086351-BriTARs.A021 | 0.342 | 0.737 | 0.464 |
| contig007524-TiITARs.A026 | contig022363-TiITARs.A044 | 0.358 | 0.770 | 0.464 |
| contig086351-BriTARs.A021 | contig061977-BurTARs.A012 | 0.339 | 0.731 | 0.464 |
| contig022375-TiITARs.A048 | contig030471-ZebTARs.A024 | 0.148 | 0.319 | 0.465 |
| contig035376-NyeTARs.A014 | contig022383-TiITARs.A054 | 0.110 | 0.237 | 0.465 |
| contig042499-NyeTARs.A028 | contig062677-ZebTARs.A018 | 0.368 | 0.792 | 0.465 |
| contig022343-TiITARs.A033 | contig061410-ZebTARs.A021 | 0.251 | 0.541 | 0.465 |
| contig022341-TiITARs.A032 | contig030440-ZebTARs.A029 | 0.264 | 0.567 | 0.465 |
| contig038663-NyeTAR.A005  | contig022390-TiITARs.A056 | 0.433 | 0.933 | 0.465 |
| contig057148-BurTARs.A028 | contig022363-TiITARs.A043 | 0.188 | 0.404 | 0.465 |
| contig061977-BurTARs.A012 | contig049540-BurTARs.A024 | 0.161 | 0.347 | 0.465 |
| contig045999-NyeTARs.A026 | contig022349-TiITARs.A035 | 0.197 | 0.425 | 0.465 |
| contig035376-NyeTARs.A014 | contig007524-TiITARs.A026 | 0.327 | 0.703 | 0.465 |
| contig056200-NyeTARs.A029 | contig062676-ZebTARs.A019 | 0.168 | 0.362 | 0.465 |
| contig061433-BurTARs.A013 | contig022378-TiITARs.A051 | 0.276 | 0.594 | 0.465 |
| contig059673-BurTARs.A016 | contig046007-NyeTARs.A017 | 0.367 | 0.790 | 0.465 |
| contig022378-TiITARs.A051 | contig066285-ZebTARs.A016 | 0.261 | 0.562 | 0.465 |
| contig035377-NyeTARs.A023 | contig022357-TiITARs.A041 | 0.273 | 0.588 | 0.465 |
| contig084880-BriTARs.A016 | contig022377-TiITARs.A050 | 0.167 | 0.360 | 0.465 |
| contig056200-NyeTARs.A029 | contig022343-TiITARs.A033 | 0.285 | 0.614 | 0.465 |
| contig060292-NyeTARs.A027 | contig030464-ZebTARs.A025 | 0.417 | 0.897 | 0.465 |
| contig084868-BriTARs.A014 | contig056200-NyeTARs.A029 | 0.185 | 0.399 | 0.465 |
| contig059673-BurTARs.A016 | contig022330-TiITARs.A028 | 0.347 | 0.747 | 0.465 |
| contig045999-NyeTARs.A026 | contig022354-TiITARs.A038 | 0.184 | 0.395 | 0.465 |
| contig022334-TiITARs.A030 | contig022377-TiITARs.A050 | 0.204 | 0.438 | 0.465 |
| contig086351-BriTARs.A021 | contig059673-BurTARs.A016 | 0.287 | 0.616 | 0.465 |
| contig060707-BurTARs.A015 | contig045088-TiITARs.A057 | 0.324 | 0.697 | 0.465 |
| contig084880-BriTARs.A016 | contig059766-BurTARs.A029 | 0.410 | 0.880 | 0.465 |
| contig062039-NyeTARs.A022 | contig022357-TiITARs.A041 | 0.283 | 0.609 | 0.465 |
| contig056020-BurTARs.A021 | contig035377-NyeTARs.A023 | 0.281 | 0.603 | 0.465 |
| contig086351-BriTARs.A021 | contig056020-BurTARs.A021 | 0.446 | 0.959 | 0.465 |
| contig060292-NyeTARs.A027 | contig022334-TiITARs.A030 | 0.390 | 0.837 | 0.465 |
| contig066285-ZebTARs.A016 | contig030440-ZebTARs.A029 | 0.284 | 0.610 | 0.465 |
| contig046007-NyeTARs.A017 | contig022345-TiITARs.A034 | 0.135 | 0.291 | 0.466 |
| contig022337-TiITARs.A031 | contig022375-TiITARs.A048 | 0.160 | 0.343 | 0.466 |
| contig022362-TiITARs.A042 | contig022375-TiITARs.A048 | 0.173 | 0.372 | 0.466 |
| contig007524-TiITARs.A026 | contig066890-ZebTARs.A014 | 0.342 | 0.735 | 0.466 |
| contig084876-BriTARs.A015 | contig022337-TiITARs.A031 | 0.271 | 0.582 | 0.466 |

|                           |                           |       |       |       |
|---------------------------|---------------------------|-------|-------|-------|
| contig007524-TiITARs.A026 | contig022349-TiITARs.A035 | 0.356 | 0.764 | 0.466 |
| contig046007-NyeTARs.A017 | contig035377-NyeTARs.A023 | 0.285 | 0.611 | 0.466 |
| contig022330-TiITARs.A028 | contig022383-TiITARs.A054 | 0.260 | 0.559 | 0.466 |
| contig035377-NyeTARs.A023 | contig022368-TiITARs.A046 | 0.269 | 0.577 | 0.466 |
| contig035381-NyeTARs.A015 | contig030440-ZebTARs.A029 | 0.065 | 0.140 | 0.466 |
| contig084880-BriTARs.A016 | contig003909-ZebTAR.A003  | 0.439 | 0.942 | 0.466 |
| contig061433-BurTARs.A013 | contig062676-ZebTARs.A019 | 0.269 | 0.577 | 0.466 |
| contig022341-TiITARs.A032 | contig066890-ZebTARs.A014 | 0.265 | 0.568 | 0.466 |
| contig084887-BriTARs.A018 | contig022357-TiITARs.A041 | 0.144 | 0.310 | 0.466 |
| contig049534-BurTARs.A025 | contig022378-TiITARs.A051 | 0.259 | 0.555 | 0.466 |
| contig022383-TiITARs.A054 | contig030471-ZebTARs.A024 | 0.268 | 0.576 | 0.466 |
| contig084880-BriTARs.A016 | contig086344-BriTARs.A020 | 0.392 | 0.841 | 0.466 |
| contig022345-TiITARs.A034 | contig066890-ZebTARs.A014 | 0.263 | 0.565 | 0.466 |
| contig084886-BriTARs.A017 | contig056023-BurTARs.A019 | 0.189 | 0.405 | 0.467 |
| contig084868-BriTARs.A014 | contig056023-BurTARs.A019 | 0.290 | 0.623 | 0.467 |
| contig035381-NyeTARs.A015 | contig045088-TiITARs.A057 | 0.349 | 0.749 | 0.467 |
| contig041024-BurTARs.A026 | contig066890-ZebTARs.A014 | 0.267 | 0.572 | 0.467 |
| contig038663-NyeTAR.A005  | contig035381-NyeTARs.A015 | 0.406 | 0.869 | 0.467 |
| contig029633-BriTAR.A003  | contig045999-NyeTARs.A026 | 0.475 | 1.017 | 0.467 |
| contig084886-BriTARs.A017 | contig035381-NyeTARs.A015 | 0.254 | 0.544 | 0.467 |
| contig045302-BurTAR.A001  | contig039642-TiITAR.A004  | 0.066 | 0.142 | 0.467 |
| contig056021-BurTARs.A020 | contig007518-TiITARs.A019 | 0.358 | 0.766 | 0.467 |
| contig060105-NyeTARs.A018 | contig030471-ZebTARs.A024 | 0.350 | 0.749 | 0.467 |
| contig045088-TiITARs.A057 | contig066056-ZebTARs.A017 | 0.325 | 0.697 | 0.467 |
| contig022368-TiITARs.A046 | contig022368-TiITARs.A047 | 0.089 | 0.191 | 0.467 |
| contig042499-NyeTARs.A028 | contig066056-ZebTARs.A017 | 0.323 | 0.691 | 0.467 |
| contig046014-NyeTARs.A024 | contig030471-ZebTARs.A024 | 0.057 | 0.121 | 0.467 |
| contig007524-TiITARs.A026 | contig022357-TiITARs.A041 | 0.379 | 0.812 | 0.467 |
| contig057145-BurTARs.A018 | contig022390-TiITARs.A056 | 0.268 | 0.573 | 0.467 |
| contig057305-BurTARs.A031 | contig022334-TiITARs.A030 | 0.388 | 0.831 | 0.467 |
| contig046014-NyeTARs.A024 | contig022353-TiITARs.A036 | 0.120 | 0.256 | 0.467 |
| contig022377-TiITARs.A050 | contig022379-TiITARs.A052 | 0.245 | 0.523 | 0.467 |
| contig022343-TiITARs.A033 | contig066056-ZebTARs.A017 | 0.328 | 0.702 | 0.467 |
| contig020038-BurTAR.A002  | contig042499-NyeTARs.A028 | 0.417 | 0.891 | 0.467 |
| contig022368-TiITARs.A047 | contig022375-TiITARs.A048 | 0.166 | 0.354 | 0.467 |
| contig049534-BurTARs.A025 | contig022354-TiITARs.A037 | 0.199 | 0.425 | 0.468 |
| contig022337-TiITARs.A031 | contig022362-TiITARs.A042 | 0.174 | 0.373 | 0.468 |
| contig049540-BurTARs.A024 | contig061410-ZebTARs.A021 | 0.169 | 0.361 | 0.468 |
| contig007524-TiITARs.A026 | contig022330-TiITARs.A028 | 0.339 | 0.725 | 0.468 |
| contig022375-TiITARs.A048 | contig062676-ZebTARs.A019 | 0.227 | 0.486 | 0.468 |
| contig034854-BurTARs.A027 | contig022345-TiITARs.A034 | 0.268 | 0.572 | 0.468 |
| contig022377-TiITARs.A050 | contig061410-ZebTARs.A021 | 0.245 | 0.524 | 0.468 |
| contig084880-BriTARs.A016 | contig056021-BurTARs.A020 | 0.186 | 0.399 | 0.468 |
| contig084868-BriTARs.A014 | contig022363-TiITARs.A044 | 0.252 | 0.538 | 0.468 |
| contig022362-TiITARs.A042 | contig022390-TiITARs.A056 | 0.267 | 0.570 | 0.468 |
| contig022330-TiITARs.A028 | contig030440-ZebTARs.A029 | 0.264 | 0.564 | 0.468 |
| contig045999-NyeTARs.A026 | contig066056-ZebTARs.A017 | 0.377 | 0.806 | 0.468 |
| contig022368-TiITARs.A047 | contig062676-ZebTARs.A019 | 0.266 | 0.569 | 0.468 |
| contig046007-NyeTARs.A017 | contig062039-NyeTARs.A022 | 0.259 | 0.553 | 0.468 |
| contig041024-BurTARs.A026 | contig022357-TiITARs.A041 | 0.138 | 0.295 | 0.468 |
| contig022343-TiITARs.A033 | contig030445-ZebTARs.A026 | 0.254 | 0.543 | 0.468 |
| contig057301-BurTARs.A017 | contig055697-BurTARs.A022 | 0.294 | 0.628 | 0.468 |
| contig007518-TiITARs.A019 | contig022377-TiITARs.A050 | 0.374 | 0.798 | 0.468 |

|                           |                           |       |       |       |
|---------------------------|---------------------------|-------|-------|-------|
| contig065494-BurTARs.A030 | contig045999-NyeTARs.A026 | 0.417 | 0.891 | 0.468 |
| contig061433-BurTARs.A013 | contig035377-NyeTARs.A023 | 0.282 | 0.602 | 0.468 |
| contig046013-NyeTARs.A021 | contig022365-TiITARs.A045 | 0.149 | 0.319 | 0.468 |
| contig082565-BriTARs.A022 | contig061417-ZebTARs.A020 | 0.250 | 0.535 | 0.468 |
| contig059673-BurTARs.A016 | contig022349-TiITARs.A035 | 0.378 | 0.808 | 0.468 |
| contig084886-BriTARs.A017 | contig059673-BurTARs.A016 | 0.363 | 0.776 | 0.468 |
| contig022353-TiITARs.A036 | contig062677-ZebTARs.A018 | 0.273 | 0.583 | 0.468 |
| contig046014-NyeTARs.A024 | contig030445-ZebTARs.A026 | 0.228 | 0.487 | 0.468 |
| contig022354-TiITARs.A037 | contig062676-ZebTARs.A019 | 0.230 | 0.491 | 0.468 |
| contig022357-TiITARs.A041 | contig022377-TiITARs.A050 | 0.140 | 0.300 | 0.468 |
| contig042499-NyeTARs.A028 | contig053139-ZebTARs.A023 | 0.289 | 0.618 | 0.468 |
| contig022324-TiITARs.A027 | contig022390-TiITARs.A055 | 0.343 | 0.732 | 0.469 |
| contig084886-BriTARs.A017 | contig084887-BriTARs.A018 | 0.171 | 0.365 | 0.469 |
| contig035375-NyeTARs.A013 | contig030464-ZebTARs.A025 | 0.277 | 0.592 | 0.469 |
| contig022354-TiITARs.A037 | contig030464-ZebTARs.A025 | 0.199 | 0.424 | 0.469 |
| contig049534-BurTARs.A025 | contig022363-TiITARs.A044 | 0.199 | 0.423 | 0.469 |
| contig084886-BriTARs.A017 | contig022353-TiITARs.A036 | 0.162 | 0.346 | 0.469 |
| contig056021-BurTARs.A020 | contig049534-BurTARs.A025 | 0.161 | 0.343 | 0.469 |
| contig082565-BriTARs.A022 | contig022334-TiITARs.A029 | 0.256 | 0.546 | 0.469 |
| contig007512-TiITARs.A024 | contig045088-TiITARs.A057 | 0.283 | 0.604 | 0.469 |
| contig082565-BriTARs.A022 | contig056021-BurTARs.A020 | 0.252 | 0.537 | 0.469 |
| contig022382-TiITARs.A053 | contig045088-TiITARs.A057 | 0.366 | 0.781 | 0.469 |
| contig084876-BriTARs.A015 | contig061417-ZebTARs.A020 | 0.250 | 0.534 | 0.469 |
| contig062039-NyeTARs.A022 | contig022337-TiITARs.A031 | 0.266 | 0.568 | 0.469 |
| contig084886-BriTARs.A017 | contig060292-NyeTARs.A027 | 0.401 | 0.856 | 0.469 |
| contig022349-TiITARs.A035 | contig022357-TiITARs.A041 | 0.164 | 0.349 | 0.469 |
| contig022377-TiITARs.A050 | contig066890-ZebTARs.A014 | 0.264 | 0.563 | 0.469 |
| contig082565-BriTARs.A022 | contig022379-TiITARs.A052 | 0.131 | 0.279 | 0.469 |
| contig007518-TiITARs.A019 | contig053139-ZebTARs.A023 | 0.309 | 0.657 | 0.469 |
| contig049540-BurTARs.A024 | contig022356-TiITARs.A040 | 0.287 | 0.611 | 0.469 |
| contig022363-TiITARs.A044 | contig062676-ZebTARs.A019 | 0.235 | 0.500 | 0.469 |
| contig057301-BurTARs.A017 | contig066691-ZebTARs.A015 | 0.356 | 0.758 | 0.470 |
| contig020038-BurTAR.A002  | contig045999-NyeTARs.A026 | 0.444 | 0.945 | 0.470 |
| contig022349-TiITARs.A035 | contig022390-TiITARs.A056 | 0.283 | 0.602 | 0.470 |
| contig022337-TiITARs.A031 | contig030445-ZebTARs.A026 | 0.261 | 0.555 | 0.470 |
| contig041024-BurTARs.A026 | contig042499-NyeTARs.A028 | 0.344 | 0.732 | 0.470 |
| contig022356-TiITARs.A040 | contig022363-TiITARs.A044 | 0.156 | 0.332 | 0.470 |
| contig061977-BurTARs.A012 | contig056200-NyeTARs.A029 | 0.163 | 0.347 | 0.470 |
| contig060707-BurTARs.A015 | contig056021-BurTARs.A020 | 0.332 | 0.708 | 0.470 |
| contig061977-BurTARs.A012 | contig022354-TiITARs.A037 | 0.224 | 0.477 | 0.470 |
| contig035381-NyeTARs.A015 | contig046014-NyeTARs.A024 | 0.236 | 0.502 | 0.470 |
| contig041024-BurTARs.A026 | contig022390-TiITARs.A056 | 0.262 | 0.558 | 0.470 |
| contig056021-BurTARs.A020 | contig030440-ZebTARs.A029 | 0.262 | 0.557 | 0.470 |
| contig061977-BurTARs.A012 | contig022355-TiITARs.A039 | 0.252 | 0.537 | 0.470 |
| contig022353-TiITARs.A036 | contig022368-TiITARs.A047 | 0.151 | 0.321 | 0.470 |
| contig084876-BriTARs.A015 | contig022362-TiITARs.A042 | 0.256 | 0.544 | 0.470 |
| contig007520-TiITARs.A025 | contig030471-ZebTARs.A024 | 0.355 | 0.756 | 0.470 |
| contig086344-BriTARs.A020 | contig022337-TiITARs.A031 | 0.369 | 0.783 | 0.470 |
| contig059673-BurTARs.A016 | contig022324-TiITARs.A027 | 0.392 | 0.832 | 0.471 |
| contig035377-NyeTARs.A023 | contig022368-TiITARs.A047 | 0.288 | 0.613 | 0.471 |
| contig038663-NyeTAR.A005  | contig066890-ZebTARs.A014 | 0.435 | 0.925 | 0.471 |
| contig035381-NyeTARs.A015 | contig022324-TiITARs.A027 | 0.278 | 0.591 | 0.471 |
| contig057301-BurTARs.A017 | contig007512-TiITARs.A024 | 0.293 | 0.623 | 0.471 |

|                           |                           |       |       |       |
|---------------------------|---------------------------|-------|-------|-------|
| contig022343-TiITARs.A033 | contig022349-TiITARs.A035 | 0.153 | 0.326 | 0.471 |
| contig035376-NyeTARs.A014 | contig022330-TiITARs.A028 | 0.255 | 0.542 | 0.471 |
| contig022356-TiITARs.A040 | contig066890-ZebTARs.A014 | 0.269 | 0.573 | 0.471 |
| contig057305-BurTARs.A031 | contig022379-TiITARs.A052 | 0.346 | 0.735 | 0.471 |
| contig084868-BriTARs.A014 | contig066691-ZebTARs.A015 | 0.300 | 0.637 | 0.471 |
| contig062039-NyeTARs.A022 | contig061417-ZebTARs.A020 | 0.251 | 0.533 | 0.471 |
| contig086351-BriTARs.A021 | contig049534-BurTARs.A025 | 0.452 | 0.959 | 0.471 |
| contig057145-BurTARs.A018 | contig022334-TiITARs.A030 | 0.189 | 0.402 | 0.471 |
| contig057301-BurTARs.A017 | contig066056-ZebTARs.A017 | 0.325 | 0.690 | 0.471 |
| contig022334-TiITARs.A029 | contig022383-TiITARs.A054 | 0.262 | 0.555 | 0.471 |
| contig056023-BurTARs.A019 | contig003909-ZebTAR.A003  | 0.448 | 0.950 | 0.471 |
| contig084887-BriTARs.A018 | contig057301-BurTARs.A017 | 0.345 | 0.732 | 0.471 |
| contig084876-BriTARs.A015 | contig030471-ZebTARs.A024 | 0.268 | 0.568 | 0.471 |
| contig034854-BurTARs.A027 | contig030464-ZebTARs.A025 | 0.281 | 0.597 | 0.471 |
| contig022355-TiITARs.A039 | contig022362-TiITARs.A042 | 0.151 | 0.320 | 0.471 |
| contig057301-BurTARs.A017 | contig056200-NyeTARs.A029 | 0.363 | 0.771 | 0.471 |
| contig082565-BriTARs.A022 | contig061410-ZebTARs.A021 | 0.132 | 0.280 | 0.471 |
| contig022343-TiITARs.A033 | contig030440-ZebTARs.A029 | 0.254 | 0.539 | 0.471 |
| contig084886-BriTARs.A017 | contig086351-BriTARs.A021 | 0.400 | 0.850 | 0.471 |
| contig046011-NyeTARs.A016 | contig022362-TiITARs.A042 | 0.230 | 0.487 | 0.471 |
| contig022363-TiITARs.A043 | contig022368-TiITARs.A046 | 0.072 | 0.153 | 0.471 |
| contig022357-TiITARs.A041 | contig061417-ZebTARs.A020 | 0.137 | 0.290 | 0.471 |
| contig061091-BurTARs.A014 | contig057301-BurTARs.A017 | 0.351 | 0.745 | 0.471 |
| contig084868-BriTARs.A014 | contig022334-TiITARs.A029 | 0.271 | 0.574 | 0.471 |
| contig046013-NyeTARs.A021 | contig022354-TiITARs.A038 | 0.149 | 0.316 | 0.471 |
| contig061417-ZebTARs.A020 | contig030440-ZebTARs.A029 | 0.263 | 0.558 | 0.471 |
| contig057305-BurTARs.A031 | contig030464-ZebTARs.A025 | 0.417 | 0.885 | 0.472 |
| contig059673-BurTARs.A016 | contig041024-BurTARs.A026 | 0.341 | 0.722 | 0.472 |
| contig042499-NyeTARs.A028 | contig022368-TiITARs.A047 | 0.397 | 0.841 | 0.472 |
| contig022341-TiITARs.A032 | contig045088-TiITARs.A057 | 0.368 | 0.781 | 0.472 |
| contig035381-NyeTARs.A015 | contig066691-ZebTARs.A015 | 0.276 | 0.585 | 0.472 |
| contig041024-BurTARs.A026 | contig062677-ZebTARs.A018 | 0.264 | 0.560 | 0.472 |
| contig022368-TiITARs.A046 | contig066691-ZebTARs.A015 | 0.140 | 0.296 | 0.472 |
| contig022324-TiITARs.A027 | contig022353-TiITARs.A036 | 0.178 | 0.376 | 0.472 |
| contig084886-BriTARs.A017 | contig056200-NyeTARs.A029 | 0.281 | 0.595 | 0.472 |
| contig007518-TiITARs.A019 | contig007512-TiITARs.A024 | 0.309 | 0.654 | 0.472 |
| contig022337-TiITARs.A031 | contig022368-TiITARs.A046 | 0.163 | 0.346 | 0.472 |
| contig049540-BurTARs.A024 | contig022324-TiITARs.A027 | 0.303 | 0.643 | 0.472 |
| contig084868-BriTARs.A014 | contig061417-ZebTARs.A020 | 0.272 | 0.576 | 0.472 |
| contig084886-BriTARs.A017 | contig057148-BurTARs.A028 | 0.027 | 0.058 | 0.472 |
| contig084880-BriTARs.A016 | contig007512-TiITARs.A024 | 0.382 | 0.809 | 0.472 |
| contig082565-BriTARs.A022 | contig057301-BurTARs.A017 | 0.349 | 0.740 | 0.472 |
| contig035377-NyeTARs.A023 | contig030471-ZebTARs.A024 | 0.280 | 0.593 | 0.472 |
| contig022363-TiITARs.A043 | contig066056-ZebTARs.A017 | 0.385 | 0.814 | 0.472 |
| contig035381-NyeTARs.A015 | contig062677-ZebTARs.A018 | 0.162 | 0.343 | 0.472 |
| contig022330-TiITARs.A028 | contig066890-ZebTARs.A014 | 0.267 | 0.566 | 0.472 |
| contig059673-BurTARs.A016 | contig046010-NyeTARs.A019 | 0.371 | 0.786 | 0.472 |
| contig022377-TiITARs.A050 | contig022390-TiITARs.A056 | 0.255 | 0.539 | 0.472 |
| contig056020-BurTARs.A021 | contig062039-NyeTARs.A022 | 0.257 | 0.544 | 0.473 |
| contig056200-NyeTARs.A029 | contig061410-ZebTARs.A021 | 0.170 | 0.361 | 0.473 |
| contig060292-NyeTARs.A027 | contig030445-ZebTARs.A026 | 0.354 | 0.749 | 0.473 |
| contig056200-NyeTARs.A029 | contig022337-TiITARs.A031 | 0.298 | 0.630 | 0.473 |
| contig056020-BurTARs.A021 | contig022349-TiITARs.A035 | 0.156 | 0.331 | 0.473 |

|                           |                           |       |       |       |
|---------------------------|---------------------------|-------|-------|-------|
| contig058002-NyeTARs.A025 | contig066691-ZebTARs.A015 | 0.363 | 0.768 | 0.473 |
| contig084886-BriTARs.A017 | contig030440-ZebTARs.A029 | 0.269 | 0.569 | 0.473 |
| contig057145-BurTARs.A018 | contig066691-ZebTARs.A015 | 0.126 | 0.267 | 0.473 |
| contig082565-BriTARs.A022 | contig042499-NyeTARs.A028 | 0.348 | 0.736 | 0.473 |
| contig084868-BriTARs.A014 | contig022357-TiITARs.A041 | 0.292 | 0.618 | 0.473 |
| contig046007-NyeTARs.A017 | contig060292-NyeTARs.A027 | 0.411 | 0.870 | 0.473 |
| contig038663-NyeTAR.A005  | contig039640-TiITAR.A002  | 0.075 | 0.159 | 0.473 |
| contig022324-TiITARs.A027 | contig066890-ZebTARs.A014 | 0.284 | 0.601 | 0.473 |
| contig066890-ZebTARs.A014 | contig030464-ZebTARs.A025 | 0.276 | 0.584 | 0.473 |
| contig060105-NyeTARs.A018 | contig022357-TiITARs.A041 | 0.359 | 0.758 | 0.473 |
| contig086344-BriTARs.A020 | contig060105-NyeTARs.A018 | 0.013 | 0.027 | 0.473 |
| contig084880-BriTARs.A016 | contig032272-NyeTAR.A004  | 0.439 | 0.929 | 0.473 |
| contig007524-TiITARs.A026 | contig022382-TiITARs.A053 | 0.333 | 0.704 | 0.473 |
| contig084880-BriTARs.A016 | contig022368-TiITARs.A047 | 0.203 | 0.430 | 0.473 |
| contig034854-BurTARs.A027 | contig035381-NyeTARs.A015 | 0.057 | 0.121 | 0.473 |
| contig022363-TiITARs.A043 | contig061410-ZebTARs.A021 | 0.266 | 0.563 | 0.473 |
| contig059673-BurTARs.A016 | contig066285-ZebTARs.A016 | 0.388 | 0.819 | 0.473 |
| contig060292-NyeTARs.A027 | contig022341-TiITARs.A032 | 0.409 | 0.863 | 0.473 |
| contig046010-NyeTARs.A019 | contig007524-TiITARs.A026 | 0.358 | 0.757 | 0.474 |
| contig045999-NyeTARs.A026 | contig066330-ZebTARs.A027 | 0.420 | 0.886 | 0.474 |
| contig022334-TiITARs.A030 | contig022355-TiITARs.A039 | 0.185 | 0.390 | 0.474 |
| contig022368-TiITARs.A047 | contig062677-ZebTARs.A018 | 0.295 | 0.623 | 0.474 |
| contig084868-BriTARs.A014 | contig022330-TiITARs.A028 | 0.273 | 0.577 | 0.474 |
| contig046010-NyeTARs.A019 | contig066890-ZebTARs.A014 | 0.269 | 0.568 | 0.474 |
| contig084886-BriTARs.A017 | contig045999-NyeTARs.A026 | 0.189 | 0.399 | 0.474 |
| contig046014-NyeTARs.A024 | contig058002-NyeTARs.A025 | 0.340 | 0.718 | 0.474 |
| contig029633-BriTAR.A003  | contig056023-BurTARs.A019 | 0.475 | 1.002 | 0.474 |
| contig062039-NyeTARs.A022 | contig022343-TiITARs.A033 | 0.267 | 0.564 | 0.474 |
| contig022353-TiITARs.A036 | contig022383-TiITARs.A054 | 0.278 | 0.586 | 0.474 |
| contig057145-BurTARs.A018 | contig066890-ZebTARs.A014 | 0.269 | 0.568 | 0.474 |
| contig045999-NyeTARs.A026 | contig022368-TiITARs.A047 | 0.204 | 0.431 | 0.474 |
| contig022355-TiITARs.A039 | contig022382-TiITARs.A053 | 0.274 | 0.578 | 0.474 |
| contig007524-TiITARs.A026 | contig062677-ZebTARs.A018 | 0.350 | 0.739 | 0.474 |
| contig022353-TiITARs.A036 | contig061410-ZebTARs.A021 | 0.250 | 0.528 | 0.474 |
| contig086351-BriTARs.A021 | contig022355-TiITARs.A039 | 0.419 | 0.883 | 0.474 |
| contig060707-BurTARs.A015 | contig022362-TiITARs.A042 | 0.357 | 0.753 | 0.474 |
| contig022345-TiITARs.A034 | contig045088-TiITARs.A057 | 0.356 | 0.751 | 0.474 |
| contig084886-BriTARs.A017 | contig022379-TiITARs.A052 | 0.253 | 0.533 | 0.474 |
| contig046007-NyeTARs.A017 | contig062677-ZebTARs.A018 | 0.291 | 0.613 | 0.474 |
| contig086351-BriTARs.A021 | contig007524-TiITARs.A026 | 0.272 | 0.574 | 0.474 |
| contig046014-NyeTARs.A024 | contig062676-ZebTARs.A019 | 0.250 | 0.528 | 0.474 |
| contig022378-TiITARs.A051 | contig030445-ZebTARs.A026 | 0.212 | 0.447 | 0.474 |
| contig046014-NyeTARs.A024 | contig022363-TiITARs.A044 | 0.154 | 0.325 | 0.474 |
| contig084868-BriTARs.A014 | contig030471-ZebTARs.A024 | 0.277 | 0.583 | 0.475 |
| contig022357-TiITARs.A041 | contig022363-TiITARs.A043 | 0.195 | 0.410 | 0.475 |
| contig049540-BurTARs.A024 | contig022379-TiITARs.A052 | 0.172 | 0.362 | 0.475 |
| contig022343-TiITARs.A033 | contig045088-TiITARs.A057 | 0.367 | 0.772 | 0.475 |
| contig045999-NyeTARs.A026 | contig023443-TiITAR.A005  | 0.433 | 0.912 | 0.475 |
| contig022356-TiITARs.A040 | contig066691-ZebTARs.A015 | 0.123 | 0.260 | 0.475 |
| contig056023-BurTARs.A019 | contig066056-ZebTARs.A017 | 0.377 | 0.795 | 0.475 |
| contig057301-BurTARs.A017 | contig022382-TiITARs.A053 | 0.363 | 0.765 | 0.475 |
| contig058002-NyeTARs.A025 | contig030440-ZebTARs.A029 | 0.332 | 0.700 | 0.475 |
| contig022390-TiITARs.A055 | contig040586-ZebTAR.A001  | 0.417 | 0.878 | 0.475 |

|                           |                           |       |       |       |
|---------------------------|---------------------------|-------|-------|-------|
| contig045302-BurTAR.A001  | contig022390-TiITARs.A055 | 0.417 | 0.878 | 0.475 |
| contig059673-BurTARs.A016 | contig022337-TiITARs.A031 | 0.374 | 0.787 | 0.475 |
| contig061091-BurTARs.A014 | contig022368-TiITARs.A047 | 0.159 | 0.335 | 0.475 |
| contig084886-BriTARs.A017 | contig049540-BurTARs.A024 | 0.279 | 0.586 | 0.475 |
| contig084886-BriTARs.A017 | contig035377-NyeTARs.A023 | 0.267 | 0.563 | 0.475 |
| contig056023-BurTARs.A019 | contig022354-TiITARs.A037 | 0.224 | 0.471 | 0.475 |
| contig022357-TiITARs.A041 | contig022382-TiITARs.A053 | 0.288 | 0.605 | 0.475 |
| contig049534-BurTARs.A025 | contig061417-ZebTARs.A020 | 0.164 | 0.345 | 0.475 |
| contig056023-BurTARs.A019 | contig022377-TiITARs.A050 | 0.167 | 0.352 | 0.475 |
| contig057145-BurTARs.A018 | contig034854-BurTARs.A027 | 0.268 | 0.564 | 0.475 |
| contig022353-TiITARs.A036 | contig022354-TiITARs.A037 | 0.165 | 0.347 | 0.475 |
| contig082565-BriTARs.A022 | contig041024-BurTARs.A026 | 0.238 | 0.500 | 0.475 |
| contig022382-TiITARs.A053 | contig061410-ZebTARs.A021 | 0.159 | 0.334 | 0.475 |
| contig084880-BriTARs.A016 | contig056134-TiITARs.A058 | 0.403 | 0.847 | 0.475 |
| contig061091-BurTARs.A014 | contig056020-BurTARs.A021 | 0.108 | 0.227 | 0.475 |
| contig084880-BriTARs.A016 | contig065494-BurTARs.A030 | 0.414 | 0.871 | 0.475 |
| contig034854-BurTARs.A027 | contig058002-NyeTARs.A025 | 0.340 | 0.714 | 0.476 |
| contig062677-ZebTARs.A018 | contig030445-ZebTARs.A026 | 0.160 | 0.337 | 0.476 |
| contig007518-TiITARs.A019 | contig022375-TiITARs.A048 | 0.365 | 0.767 | 0.476 |
| contig084886-BriTARs.A017 | contig057305-BurTARs.A031 | 0.401 | 0.844 | 0.476 |
| contig062039-NyeTARs.A022 | contig022365-TiITARs.A045 | 0.254 | 0.534 | 0.476 |
| contig086351-BriTARs.A021 | contig046007-NyeTARs.A017 | 0.421 | 0.886 | 0.476 |
| contig061433-BurTARs.A013 | contig062039-NyeTARs.A022 | 0.287 | 0.602 | 0.476 |
| contig022356-TiITARs.A040 | contig062677-ZebTARs.A018 | 0.289 | 0.608 | 0.476 |
| contig060707-BurTARs.A015 | contig022390-TiITARs.A055 | 0.425 | 0.893 | 0.476 |
| contig056021-BurTARs.A020 | contig022362-TiITARs.A042 | 0.157 | 0.330 | 0.476 |
| contig022334-TiITARs.A029 | contig022362-TiITARs.A042 | 0.145 | 0.305 | 0.476 |
| contig056021-BurTARs.A020 | contig062039-NyeTARs.A022 | 0.259 | 0.544 | 0.476 |
| contig060292-NyeTARs.A027 | contig022354-TiITARs.A038 | 0.409 | 0.859 | 0.476 |
| contig022377-TiITARs.A050 | contig061417-ZebTARs.A020 | 0.145 | 0.305 | 0.476 |
| contig055697-BurTARs.A022 | contig045999-NyeTARs.A026 | 0.397 | 0.833 | 0.476 |
| contig082565-BriTARs.A022 | contig046010-NyeTARs.A019 | 0.260 | 0.545 | 0.476 |
| contig022354-TiITARs.A037 | contig066285-ZebTARs.A016 | 0.209 | 0.438 | 0.476 |
| contig025313-BriTAR.A002  | contig084880-BriTARs.A016 | 0.436 | 0.916 | 0.476 |
| contig042499-NyeTARs.A028 | contig007512-TiITARs.A024 | 0.289 | 0.607 | 0.476 |
| contig059673-BurTARs.A016 | contig022334-TiITARs.A029 | 0.347 | 0.729 | 0.476 |
| contig007518-TiITARs.A019 | contig022368-TiITARs.A047 | 0.384 | 0.806 | 0.476 |
| contig041024-BurTARs.A026 | contig045088-TiITARs.A057 | 0.342 | 0.718 | 0.477 |
| contig022353-TiITARs.A036 | contig030445-ZebTARs.A026 | 0.252 | 0.528 | 0.477 |
| contig086344-BriTARs.A020 | contig056021-BurTARs.A020 | 0.340 | 0.713 | 0.477 |
| contig035376-NyeTARs.A014 | contig061417-ZebTARs.A020 | 0.250 | 0.524 | 0.477 |
| contig025313-BriTAR.A002  | contig056023-BurTARs.A019 | 0.443 | 0.930 | 0.477 |
| contig022334-TiITARs.A029 | contig022354-TiITARs.A037 | 0.169 | 0.355 | 0.477 |
| contig084886-BriTARs.A017 | contig022334-TiITARs.A030 | 0.200 | 0.420 | 0.477 |
| contig007520-TiITARs.A025 | contig030440-ZebTARs.A029 | 0.338 | 0.708 | 0.477 |
| contig084880-BriTARs.A016 | contig023443-TiITAR.A005  | 0.427 | 0.895 | 0.477 |
| contig035381-NyeTARs.A015 | contig042499-NyeTARs.A028 | 0.346 | 0.726 | 0.477 |
| contig022343-TiITARs.A033 | contig022379-TiITARs.A052 | 0.249 | 0.523 | 0.477 |
| contig084876-BriTARs.A015 | contig022343-TiITARs.A033 | 0.263 | 0.552 | 0.477 |
| contig061433-BurTARs.A013 | contig035381-NyeTARs.A015 | 0.279 | 0.586 | 0.477 |
| contig022343-TiITARs.A033 | contig062676-ZebTARs.A019 | 0.263 | 0.552 | 0.477 |
| contig022324-TiITARs.A027 | contig022390-TiITARs.A056 | 0.281 | 0.590 | 0.477 |
| contig059673-BurTARs.A016 | contig022357-TiITARs.A041 | 0.387 | 0.810 | 0.477 |

|                           |                           |       |       |       |
|---------------------------|---------------------------|-------|-------|-------|
| contig084880-BriTARs.A016 | contig046014-NyeTARs.A024 | 0.174 | 0.365 | 0.477 |
| contig022355-TiITARs.A039 | contig066890-ZebTARs.A014 | 0.280 | 0.587 | 0.477 |
| contig022334-TiITARs.A030 | contig022349-TiITARs.A035 | 0.197 | 0.414 | 0.477 |
| contig084887-BriTARs.A018 | contig022337-TiITARs.A031 | 0.118 | 0.247 | 0.477 |
| contig035376-NyeTARs.A014 | contig022334-TiITARs.A029 | 0.255 | 0.535 | 0.477 |
| contig056020-BurTARs.A021 | contig045999-NyeTARs.A026 | 0.184 | 0.386 | 0.477 |
| contig056021-BurTARs.A020 | contig035376-NyeTARs.A014 | 0.251 | 0.527 | 0.477 |
| contig045999-NyeTARs.A026 | contig022345-TiITARs.A034 | 0.187 | 0.391 | 0.477 |
| contig059673-BurTARs.A016 | contig022334-TiITARs.A030 | 0.355 | 0.744 | 0.478 |
| contig056200-NyeTARs.A029 | contig022356-TiITARs.A040 | 0.288 | 0.604 | 0.478 |
| contig022363-TiITARs.A044 | contig022390-TiITARs.A056 | 0.239 | 0.501 | 0.478 |
| contig046014-NyeTARs.A024 | contig007520-TiITARs.A025 | 0.337 | 0.706 | 0.478 |
| contig022353-TiITARs.A036 | contig022365-TiITARs.A045 | 0.137 | 0.286 | 0.478 |
| contig084876-BriTARs.A015 | contig022363-TiITARs.A044 | 0.235 | 0.492 | 0.478 |
| contig035376-NyeTARs.A014 | contig061410-ZebTARs.A021 | 0.133 | 0.278 | 0.478 |
| contig035375-NyeTARs.A013 | contig046010-NyeTARs.A019 | 0.275 | 0.576 | 0.478 |
| contig084868-BriTARs.A014 | contig061091-BurTARs.A014 | 0.296 | 0.619 | 0.478 |
| contig062039-NyeTARs.A022 | contig022377-TiITARs.A050 | 0.249 | 0.522 | 0.478 |
| contig042499-NyeTARs.A028 | contig056200-NyeTARs.A029 | 0.367 | 0.767 | 0.478 |
| contig056021-BurTARs.A020 | contig022337-TiITARs.A031 | 0.128 | 0.268 | 0.478 |
| contig056023-BurTARs.A019 | contig032272-NyeTAR.A004  | 0.448 | 0.936 | 0.478 |
| contig022379-TiITARs.A052 | contig030471-ZebTARs.A024 | 0.260 | 0.544 | 0.478 |
| contig066890-ZebTARs.A014 | contig066285-ZebTARs.A016 | 0.282 | 0.590 | 0.478 |
| contig086351-BriTARs.A021 | contig022354-TiITARs.A038 | 0.408 | 0.853 | 0.478 |
| contig046014-NyeTARs.A024 | contig066890-ZebTARs.A014 | 0.269 | 0.563 | 0.478 |
| contig035376-NyeTARs.A014 | contig022354-TiITARs.A037 | 0.233 | 0.488 | 0.478 |
| contig022383-TiITARs.A054 | contig022390-TiITARs.A055 | 0.141 | 0.294 | 0.478 |
| contig084868-BriTARs.A014 | contig045088-TiITARs.A057 | 0.370 | 0.773 | 0.478 |
| contig086344-BriTARs.A020 | contig042499-NyeTARs.A028 | 0.330 | 0.691 | 0.478 |
| contig022377-TiITARs.A050 | contig030440-ZebTARs.A029 | 0.264 | 0.551 | 0.478 |
| contig049540-BurTARs.A024 | contig066691-ZebTARs.A015 | 0.291 | 0.609 | 0.478 |
| contig007524-TiITARs.A026 | contig022334-TiITARs.A029 | 0.339 | 0.708 | 0.478 |
| contig060105-NyeTARs.A018 | contig022390-TiITARs.A056 | 0.339 | 0.709 | 0.479 |
| contig022390-TiITARs.A056 | contig066890-ZebTARs.A014 | 0.035 | 0.072 | 0.479 |
| contig046010-NyeTARs.A019 | contig022363-TiITARs.A043 | 0.185 | 0.386 | 0.479 |
| contig022354-TiITARs.A037 | contig030440-ZebTARs.A029 | 0.249 | 0.520 | 0.479 |
| contig042499-NyeTARs.A028 | contig022345-TiITARs.A034 | 0.355 | 0.742 | 0.479 |
| contig022354-TiITARs.A037 | contig061410-ZebTARs.A021 | 0.225 | 0.470 | 0.479 |
| contig056023-BurTARs.A019 | contig065494-BurTARs.A030 | 0.415 | 0.866 | 0.479 |
| contig084880-BriTARs.A016 | contig007520-TiITARs.A025 | 0.393 | 0.822 | 0.479 |
| contig086351-BriTARs.A021 | contig035381-NyeTARs.A015 | 0.368 | 0.769 | 0.479 |
| contig061091-BurTARs.A014 | contig022368-TiITARs.A046 | 0.136 | 0.285 | 0.479 |
| contig022363-TiITARs.A044 | contig022320-TiITARs.A059 | 0.155 | 0.323 | 0.479 |
| contig042499-NyeTARs.A028 | contig022343-TiITARs.A033 | 0.366 | 0.763 | 0.479 |
| contig082565-BriTARs.A022 | contig022355-TiITARs.A039 | 0.256 | 0.535 | 0.479 |
| contig045999-NyeTARs.A026 | contig022383-TiITARs.A054 | 0.274 | 0.573 | 0.479 |
| contig057301-BurTARs.A017 | contig022345-TiITARs.A034 | 0.360 | 0.751 | 0.479 |
| contig059673-BurTARs.A016 | contig022354-TiITARs.A037 | 0.349 | 0.729 | 0.479 |
| contig057301-BurTARs.A017 | contig022368-TiITARs.A047 | 0.397 | 0.828 | 0.479 |
| contig056021-BurTARs.A020 | contig022334-TiITARs.A029 | 0.046 | 0.096 | 0.479 |
| contig084880-BriTARs.A016 | contig022365-TiITARs.A045 | 0.185 | 0.385 | 0.479 |
| contig022365-TiITARs.A045 | contig022378-TiITARs.A051 | 0.257 | 0.536 | 0.479 |
| contig049540-BurTARs.A024 | contig007524-TiITARs.A026 | 0.349 | 0.727 | 0.479 |



|                           |                           |       |       |       |
|---------------------------|---------------------------|-------|-------|-------|
| contig046011-NyeTARs.A016 | contig022355-TiITARs.A039 | 0.236 | 0.492 | 0.479 |
| contig057301-BurTARs.A017 | contig022343-TiITARs.A033 | 0.370 | 0.773 | 0.479 |
| contig007524-TiITARs.A026 | contig022390-TiITARs.A056 | 0.341 | 0.711 | 0.479 |
| contig041024-BurTARs.A026 | contig007524-TiITARs.A026 | 0.327 | 0.681 | 0.480 |
| contig060292-NyeTARs.A027 | contig022379-TiITARs.A052 | 0.346 | 0.722 | 0.480 |
| contig056200-NyeTARs.A029 | contig022379-TiITARs.A052 | 0.174 | 0.362 | 0.480 |
| contig059673-BurTARs.A016 | contig022363-TiITARs.A044 | 0.372 | 0.775 | 0.480 |
| contig022334-TiITARs.A029 | contig030440-ZebTARs.A029 | 0.265 | 0.553 | 0.480 |
| contig034854-BurTARs.A027 | contig022337-TiITARs.A031 | 0.278 | 0.579 | 0.480 |
| contig056023-BurTARs.A019 | contig041024-BurTARs.A026 | 0.173 | 0.361 | 0.480 |
| contig084886-BriTARs.A017 | contig007524-TiITARs.A026 | 0.356 | 0.743 | 0.480 |
| contig061091-BurTARs.A014 | contig007524-TiITARs.A026 | 0.365 | 0.761 | 0.480 |
| contig046007-NyeTARs.A017 | contig022362-TiITARs.A042 | 0.162 | 0.338 | 0.480 |
| contig007520-TiITARs.A025 | contig022324-TiITARs.A027 | 0.368 | 0.767 | 0.480 |
| contig056020-BurTARs.A021 | contig022383-TiITARs.A054 | 0.270 | 0.563 | 0.480 |
| contig059673-BurTARs.A016 | contig022363-TiITARs.A043 | 0.404 | 0.842 | 0.480 |
| contig057305-BurTARs.A031 | contig022341-TiITARs.A032 | 0.409 | 0.851 | 0.480 |
| contig022357-TiITARs.A041 | contig066691-ZebTARs.A015 | 0.147 | 0.307 | 0.480 |
| contig062039-NyeTARs.A022 | contig022356-TiITARs.A040 | 0.273 | 0.568 | 0.480 |
| contig084887-BriTARs.A018 | contig022368-TiITARs.A046 | 0.135 | 0.282 | 0.480 |
| contig049540-BurTARs.A024 | contig041024-BurTARs.A026 | 0.263 | 0.548 | 0.480 |
| contig022334-TiITARs.A030 | contig022357-TiITARs.A041 | 0.193 | 0.402 | 0.480 |
| contig022363-TiITARs.A044 | contig022368-TiITARs.A047 | 0.159 | 0.332 | 0.480 |
| contig059673-BurTARs.A016 | contig022368-TiITARs.A047 | 0.380 | 0.792 | 0.480 |
| contig034854-BurTARs.A027 | contig046010-NyeTARs.A019 | 0.279 | 0.581 | 0.480 |
| contig022357-TiITARs.A041 | contig022362-TiITARs.A042 | 0.170 | 0.353 | 0.480 |
| contig022343-TiITARs.A033 | contig022354-TiITARs.A037 | 0.185 | 0.385 | 0.480 |
| contig086351-BriTARs.A021 | contig022379-TiITARs.A052 | 0.353 | 0.734 | 0.480 |
| contig056020-BurTARs.A021 | contig062677-ZebTARs.A018 | 0.290 | 0.603 | 0.480 |
| contig061091-BurTARs.A014 | contig057145-BurTARs.A018 | 0.123 | 0.256 | 0.480 |
| contig022362-TiITARs.A042 | contig030445-ZebTARs.A026 | 0.258 | 0.537 | 0.480 |
| contig058002-NyeTARs.A025 | contig007518-TiITARs.A019 | 0.267 | 0.555 | 0.481 |
| contig062039-NyeTARs.A022 | contig022363-TiITARs.A044 | 0.243 | 0.505 | 0.481 |
| contig022390-TiITARs.A056 | contig066285-ZebTARs.A016 | 0.275 | 0.571 | 0.481 |
| contig022365-TiITARs.A045 | contig045088-TiITARs.A057 | 0.380 | 0.791 | 0.481 |
| contig084880-BriTARs.A016 | contig066330-ZebTARs.A027 | 0.417 | 0.866 | 0.481 |
| contig084880-BriTARs.A016 | contig022356-TiITARs.A040 | 0.192 | 0.399 | 0.481 |
| contig022349-TiITARs.A035 | contig022355-TiITARs.A039 | 0.150 | 0.313 | 0.481 |
| contig082565-BriTARs.A022 | contig057305-BurTARs.A031 | 0.353 | 0.733 | 0.481 |
| contig022355-TiITARs.A039 | contig022363-TiITARs.A044 | 0.164 | 0.340 | 0.481 |
| contig057145-BurTARs.A018 | contig022378-TiITARs.A051 | 0.259 | 0.538 | 0.481 |
| contig022330-TiITARs.A028 | contig022354-TiITARs.A037 | 0.168 | 0.348 | 0.481 |
| contig084880-BriTARs.A016 | contig055697-BurTARs.A022 | 0.397 | 0.825 | 0.482 |
| contig084886-BriTARs.A017 | contig062676-ZebTARs.A019 | 0.257 | 0.533 | 0.482 |
| contig042499-NyeTARs.A028 | contig022382-TiITARs.A053 | 0.366 | 0.761 | 0.482 |
| contig046013-NyeTARs.A021 | contig022354-TiITARs.A037 | 0.176 | 0.366 | 0.482 |
| contig046014-NyeTARs.A024 | contig022390-TiITARs.A056 | 0.265 | 0.550 | 0.482 |
| contig056200-NyeTARs.A029 | contig022324-TiITARs.A027 | 0.306 | 0.634 | 0.482 |
| contig046007-NyeTARs.A017 | contig022390-TiITARs.A055 | 0.265 | 0.551 | 0.482 |
| contig057301-BurTARs.A017 | contig035381-NyeTARs.A015 | 0.353 | 0.732 | 0.482 |
| contig061977-BurTARs.A012 | contig066890-ZebTARs.A014 | 0.160 | 0.331 | 0.482 |
| contig007524-TiITARs.A026 | contig022320-TiITARs.A059 | 0.332 | 0.689 | 0.482 |
| contig060707-BurTARs.A015 | contig022353-TiITARs.A036 | 0.358 | 0.743 | 0.482 |

|                           |                           |       |       |       |
|---------------------------|---------------------------|-------|-------|-------|
| contig022337-TiITARs.A031 | contig062676-ZebTARs.A019 | 0.274 | 0.567 | 0.482 |
| contig084880-BriTARs.A016 | contig022368-TiITARs.A046 | 0.195 | 0.404 | 0.482 |
| contig061091-BurTARs.A014 | contig022356-TiITARs.A040 | 0.120 | 0.249 | 0.482 |
| contig046014-NyeTARs.A024 | contig062677-ZebTARs.A018 | 0.269 | 0.558 | 0.482 |
| contig058002-NyeTARs.A025 | contig022375-TiITARs.A048 | 0.337 | 0.700 | 0.482 |
| contig022355-TiITARs.A039 | contig062676-ZebTARs.A019 | 0.266 | 0.551 | 0.482 |
| contig086344-BriTARs.A020 | contig057301-BurTARs.A017 | 0.333 | 0.690 | 0.483 |
| contig084880-BriTARs.A016 | contig060707-BurTARs.A015 | 0.386 | 0.801 | 0.483 |
| contig057145-BurTARs.A018 | contig022353-TiITARs.A036 | 0.139 | 0.287 | 0.483 |
| contig022343-TiITARs.A033 | contig022378-TiITARs.A051 | 0.261 | 0.541 | 0.483 |
| contig057305-BurTARs.A031 | contig022354-TiITARs.A038 | 0.409 | 0.847 | 0.483 |
| contig035381-NyeTARs.A015 | contig022357-TiITARs.A041 | 0.279 | 0.579 | 0.483 |
| contig056020-BurTARs.A021 | contig046011-NyeTARs.A016 | 0.238 | 0.492 | 0.483 |
| contig056021-BurTARs.A020 | contig060105-NyeTARs.A018 | 0.338 | 0.701 | 0.483 |
| contig084880-BriTARs.A016 | contig022349-TiITARs.A035 | 0.203 | 0.419 | 0.483 |
| contig084887-BriTARs.A018 | contig035381-NyeTARs.A015 | 0.270 | 0.559 | 0.483 |
| contig086344-BriTARs.A020 | contig045088-TiITARs.A057 | 0.337 | 0.698 | 0.483 |
| contig022345-TiITARs.A034 | contig022349-TiITARs.A035 | 0.153 | 0.317 | 0.483 |
| contig059673-BurTARs.A016 | contig022382-TiITARs.A053 | 0.346 | 0.715 | 0.483 |
| contig066691-ZebTARs.A015 | contig062677-ZebTARs.A018 | 0.292 | 0.605 | 0.483 |
| contig060292-NyeTARs.A027 | contig022355-TiITARs.A039 | 0.417 | 0.864 | 0.483 |
| contig049534-BurTARs.A025 | contig007520-TiITARs.A025 | 0.379 | 0.783 | 0.483 |
| contig022368-TiITARs.A047 | contig022390-TiITARs.A056 | 0.281 | 0.580 | 0.483 |
| contig049540-BurTARs.A024 | contig035381-NyeTARs.A015 | 0.160 | 0.331 | 0.483 |
| contig035375-NyeTARs.A013 | contig022349-TiITARs.A035 | 0.277 | 0.572 | 0.483 |
| contig084887-BriTARs.A018 | contig022363-TiITARs.A044 | 0.167 | 0.344 | 0.483 |
| contig022330-TiITARs.A028 | contig045088-TiITARs.A057 | 0.366 | 0.757 | 0.483 |
| contig061433-BurTARs.A013 | contig030445-ZebTARs.A026 | 0.275 | 0.569 | 0.484 |
| contig022356-TiITARs.A040 | contig022390-TiITARs.A056 | 0.267 | 0.552 | 0.484 |
| contig084880-BriTARs.A016 | contig020038-BurTAR.A002  | 0.444 | 0.918 | 0.484 |
| contig022363-TiITARs.A044 | contig022375-TiITARs.A048 | 0.090 | 0.186 | 0.484 |
| contig082565-BriTARs.A022 | contig022363-TiITARs.A044 | 0.237 | 0.491 | 0.484 |
| contig057305-BurTARs.A031 | contig046007-NyeTARs.A017 | 0.417 | 0.861 | 0.484 |
| contig084880-BriTARs.A016 | contig062676-ZebTARs.A019 | 0.273 | 0.564 | 0.484 |
| contig059673-BurTARs.A016 | contig022320-TiITARs.A059 | 0.349 | 0.721 | 0.484 |
| contig022356-TiITARs.A040 | contig022390-TiITARs.A055 | 0.234 | 0.483 | 0.484 |
| contig086351-BriTARs.A021 | contig030445-ZebTARs.A026 | 0.360 | 0.743 | 0.484 |
| contig041024-BurTARs.A026 | contig022375-TiITARs.A048 | 0.139 | 0.287 | 0.484 |
| contig056023-BurTARs.A019 | contig022349-TiITARs.A035 | 0.199 | 0.411 | 0.484 |
| contig056023-BurTARs.A019 | contig066330-ZebTARs.A027 | 0.417 | 0.862 | 0.484 |
| contig035375-NyeTARs.A013 | contig022330-TiITARs.A028 | 0.274 | 0.565 | 0.484 |
| contig062676-ZebTARs.A019 | contig030445-ZebTARs.A026 | 0.109 | 0.225 | 0.484 |
| contig022375-TiITARs.A048 | contig030445-ZebTARs.A026 | 0.218 | 0.451 | 0.484 |
| contig045999-NyeTARs.A026 | contig007512-TiITARs.A024 | 0.385 | 0.795 | 0.484 |
| contig035381-NyeTARs.A015 | contig022365-TiITARs.A045 | 0.270 | 0.557 | 0.484 |
| contig022363-TiITARs.A043 | contig059768-ZebTARs.A022 | 0.376 | 0.777 | 0.484 |
| contig022368-TiITARs.A047 | contig066691-ZebTARs.A015 | 0.163 | 0.335 | 0.485 |
| contig034854-BurTARs.A027 | contig022354-TiITARs.A037 | 0.247 | 0.510 | 0.485 |
| contig007518-TiITARs.A019 | contig022357-TiITARs.A041 | 0.403 | 0.831 | 0.485 |
| contig061091-BurTARs.A014 | contig022337-TiITARs.A031 | 0.117 | 0.241 | 0.485 |
| contig045999-NyeTARs.A026 | contig056134-TiITARs.A058 | 0.403 | 0.831 | 0.485 |
| contig022377-TiITARs.A050 | contig022378-TiITARs.A051 | 0.243 | 0.502 | 0.485 |
| contig056023-BurTARs.A019 | contig022320-TiITARs.A059 | 0.174 | 0.359 | 0.485 |

|                           |                           |       |       |       |
|---------------------------|---------------------------|-------|-------|-------|
| contig035376-NyeTARs.A014 | contig022379-TiITARs.A052 | 0.132 | 0.271 | 0.485 |
| contig022334-TiITARs.A029 | contig045088-TiITARs.A057 | 0.363 | 0.749 | 0.485 |
| contig084880-BriTARs.A016 | contig022357-TiITARs.A041 | 0.190 | 0.392 | 0.485 |
| contig022356-TiITARs.A040 | contig062676-ZebTARs.A019 | 0.258 | 0.531 | 0.485 |
| contig022343-TiITARs.A033 | contig022382-TiITARs.A053 | 0.276 | 0.569 | 0.485 |
| contig046007-NyeTARs.A017 | contig022349-TiITARs.A035 | 0.162 | 0.334 | 0.485 |
| contig022356-TiITARs.A040 | contig022382-TiITARs.A053 | 0.279 | 0.575 | 0.485 |
| contig084868-BriTARs.A014 | contig035381-NyeTARs.A015 | 0.122 | 0.252 | 0.485 |
| contig022363-TiITARs.A043 | contig022390-TiITARs.A056 | 0.291 | 0.600 | 0.485 |
| contig035376-NyeTARs.A014 | contig022320-TiITARs.A059 | 0.240 | 0.495 | 0.485 |
| contig042499-NyeTARs.A028 | contig022363-TiITARs.A044 | 0.382 | 0.787 | 0.485 |
| contig049540-BurTARs.A024 | contig022320-TiITARs.A059 | 0.265 | 0.545 | 0.485 |
| contig057145-BurTARs.A018 | contig056023-BurTARs.A019 | 0.195 | 0.401 | 0.485 |
| contig059673-BurTARs.A016 | contig056023-BurTARs.A019 | 0.400 | 0.824 | 0.485 |
| contig061091-BurTARs.A014 | contig035381-NyeTARs.A015 | 0.272 | 0.561 | 0.485 |
| contig022378-TiITARs.A051 | contig045088-TiITARs.A057 | 0.349 | 0.719 | 0.485 |
| contig035376-NyeTARs.A014 | contig022378-TiITARs.A051 | 0.225 | 0.463 | 0.485 |
| contig035376-NyeTARs.A014 | contig045088-TiITARs.A057 | 0.360 | 0.743 | 0.485 |
| contig022334-TiITARs.A030 | contig066890-ZebTARs.A014 | 0.264 | 0.543 | 0.485 |
| contig035375-NyeTARs.A013 | contig007520-TiITARs.A025 | 0.338 | 0.697 | 0.485 |
| contig046011-NyeTARs.A016 | contig022368-TiITARs.A047 | 0.253 | 0.522 | 0.486 |
| contig022390-TiITARs.A055 | contig045088-TiITARs.A057 | 0.361 | 0.744 | 0.486 |
| contig022363-TiITARs.A044 | contig022365-TiITARs.A045 | 0.162 | 0.334 | 0.486 |
| contig060105-NyeTARs.A018 | contig022362-TiITARs.A042 | 0.364 | 0.750 | 0.486 |
| contig022377-TiITARs.A050 | contig022382-TiITARs.A053 | 0.269 | 0.554 | 0.486 |
| contig057145-BurTARs.A018 | contig045999-NyeTARs.A026 | 0.195 | 0.401 | 0.486 |
| contig061091-BurTARs.A014 | contig049540-BurTARs.A024 | 0.287 | 0.592 | 0.486 |
| contig056020-BurTARs.A021 | contig022363-TiITARs.A044 | 0.164 | 0.337 | 0.486 |
| contig056023-BurTARs.A019 | contig022383-TiITARs.A054 | 0.275 | 0.565 | 0.486 |
| contig056023-BurTARs.A019 | contig056134-TiITARs.A058 | 0.398 | 0.820 | 0.486 |
| contig035377-NyeTARs.A023 | contig022378-TiITARs.A051 | 0.250 | 0.514 | 0.486 |
| contig060292-NyeTARs.A027 | contig066691-ZebTARs.A015 | 0.410 | 0.843 | 0.486 |
| contig056023-BurTARs.A019 | contig023443-TiITAR.A005  | 0.436 | 0.897 | 0.486 |
| contig045999-NyeTARs.A026 | contig022365-TiITARs.A045 | 0.187 | 0.384 | 0.486 |
| contig022363-TiITARs.A044 | contig022379-TiITARs.A052 | 0.232 | 0.477 | 0.486 |
| contig022363-TiITARs.A044 | contig045088-TiITARs.A057 | 0.388 | 0.797 | 0.486 |
| contig022337-TiITARs.A031 | contig022379-TiITARs.A052 | 0.261 | 0.537 | 0.486 |
| contig056021-BurTARs.A020 | contig045088-TiITARs.A057 | 0.360 | 0.741 | 0.486 |
| contig046014-NyeTARs.A024 | contig022375-TiITARs.A048 | 0.139 | 0.286 | 0.486 |
| contig022382-TiITARs.A053 | contig062676-ZebTARs.A019 | 0.158 | 0.325 | 0.486 |
| contig007518-TiITARs.A019 | contig022382-TiITARs.A053 | 0.359 | 0.739 | 0.486 |
| contig007518-TiITARs.A019 | contig022379-TiITARs.A052 | 0.340 | 0.699 | 0.486 |
| contig086344-BriTARs.A020 | contig056020-BurTARs.A021 | 0.388 | 0.798 | 0.486 |
| contig022355-TiITARs.A039 | contig061410-ZebTARs.A021 | 0.256 | 0.526 | 0.486 |
| contig084880-BriTARs.A016 | contig086337-BriTARs.A019 | 0.393 | 0.808 | 0.486 |
| contig056020-BurTARs.A021 | contig061410-ZebTARs.A021 | 0.252 | 0.518 | 0.487 |
| contig022363-TiITARs.A043 | contig030464-ZebTARs.A025 | 0.183 | 0.375 | 0.487 |
| contig035375-NyeTARs.A013 | contig022356-TiITARs.A040 | 0.276 | 0.566 | 0.487 |
| contig084868-BriTARs.A014 | contig022382-TiITARs.A053 | 0.175 | 0.360 | 0.487 |
| contig022349-TiITARs.A035 | contig062677-ZebTARs.A018 | 0.309 | 0.634 | 0.487 |
| contig049540-BurTARs.A024 | contig030445-ZebTARs.A026 | 0.158 | 0.325 | 0.487 |
| contig022363-TiITARs.A044 | contig066285-ZebTARs.A016 | 0.205 | 0.421 | 0.487 |
| contig049540-BurTARs.A024 | contig007518-TiITARs.A019 | 0.369 | 0.758 | 0.487 |

|                           |                           |       |       |       |
|---------------------------|---------------------------|-------|-------|-------|
| contig086344-BriTARs.A020 | contig022353-TiITARs.A036 | 0.367 | 0.754 | 0.487 |
| contig022320-TiITARs.A059 | contig062677-ZebTARs.A018 | 0.268 | 0.550 | 0.487 |
| contig082565-BriTARs.A022 | contig066691-ZebTARs.A015 | 0.279 | 0.573 | 0.487 |
| contig022353-TiITARs.A036 | contig022368-TiITARs.A046 | 0.128 | 0.262 | 0.487 |
| contig061091-BurTARs.A014 | contig060292-NyeTARs.A027 | 0.410 | 0.842 | 0.487 |
| contig084880-BriTARs.A016 | contig053139-ZebTARs.A023 | 0.386 | 0.793 | 0.487 |
| contig022362-TiITARs.A042 | contig061417-ZebTARs.A020 | 0.157 | 0.323 | 0.487 |
| contig022354-TiITARs.A037 | contig022378-TiITARs.A051 | 0.224 | 0.459 | 0.487 |
| contig082565-BriTARs.A022 | contig062677-ZebTARs.A018 | 0.163 | 0.334 | 0.487 |
| contig056020-BurTARs.A021 | contig035381-NyeTARs.A015 | 0.262 | 0.538 | 0.487 |
| contig084886-BriTARs.A017 | contig046010-NyeTARs.A019 | 0.024 | 0.050 | 0.487 |
| contig022363-TiITARs.A043 | contig022365-TiITARs.A045 | 0.135 | 0.277 | 0.487 |
| contig058002-NyeTARs.A025 | contig022324-TiITARs.A027 | 0.374 | 0.768 | 0.487 |
| contig059673-BurTARs.A016 | contig022390-TiITARs.A056 | 0.356 | 0.731 | 0.487 |
| contig049540-BurTARs.A024 | contig030471-ZebTARs.A024 | 0.284 | 0.582 | 0.487 |
| contig056200-NyeTARs.A029 | contig007524-TiITARs.A026 | 0.350 | 0.719 | 0.487 |
| contig056020-BurTARs.A021 | contig042499-NyeTARs.A028 | 0.373 | 0.766 | 0.487 |
| contig084880-BriTARs.A016 | contig007524-TiITARs.A026 | 0.399 | 0.818 | 0.487 |
| contig022383-TiITARs.A054 | contig066691-ZebTARs.A015 | 0.293 | 0.600 | 0.487 |
| contig046011-NyeTARs.A016 | contig022356-TiITARs.A040 | 0.236 | 0.484 | 0.488 |
| contig045999-NyeTARs.A026 | contig022368-TiITARs.A046 | 0.193 | 0.396 | 0.488 |
| contig007524-TiITARs.A026 | contig022377-TiITARs.A050 | 0.354 | 0.726 | 0.488 |
| contig061091-BurTARs.A014 | contig022357-TiITARs.A041 | 0.144 | 0.295 | 0.488 |
| contig035375-NyeTARs.A013 | contig022341-TiITARs.A032 | 0.273 | 0.561 | 0.488 |
| contig059673-BurTARs.A016 | contig022365-TiITARs.A045 | 0.391 | 0.803 | 0.488 |
| contig022378-TiITARs.A051 | contig066890-ZebTARs.A014 | 0.237 | 0.487 | 0.488 |
| contig007524-TiITARs.A026 | contig022353-TiITARs.A036 | 0.390 | 0.799 | 0.488 |
| contig007518-TiITARs.A019 | contig022378-TiITARs.A051 | 0.375 | 0.769 | 0.488 |
| contig046010-NyeTARs.A019 | contig022375-TiITARs.A048 | 0.167 | 0.342 | 0.488 |
| contig059673-BurTARs.A016 | contig022345-TiITARs.A034 | 0.358 | 0.734 | 0.488 |
| contig042499-NyeTARs.A028 | contig022330-TiITARs.A028 | 0.365 | 0.748 | 0.488 |
| contig022337-TiITARs.A031 | contig022341-TiITARs.A032 | 0.148 | 0.303 | 0.488 |
| contig035376-NyeTARs.A014 | contig062676-ZebTARs.A019 | 0.110 | 0.226 | 0.488 |
| contig056021-BurTARs.A020 | contig035377-NyeTARs.A023 | 0.261 | 0.535 | 0.488 |
| contig086344-BriTARs.A020 | contig022390-TiITARs.A055 | 0.398 | 0.816 | 0.488 |
| contig038663-NyeTAR.A005  | contig022390-TiITARs.A055 | 0.431 | 0.882 | 0.488 |
| contig022368-TiITARs.A046 | contig022379-TiITARs.A052 | 0.250 | 0.512 | 0.488 |
| contig042499-NyeTARs.A028 | contig022390-TiITARs.A055 | 0.362 | 0.741 | 0.488 |
| contig057301-BurTARs.A017 | contig022390-TiITARs.A055 | 0.362 | 0.741 | 0.488 |
| contig007518-TiITARs.A019 | contig061417-ZebTARs.A020 | 0.373 | 0.763 | 0.488 |
| contig035375-NyeTARs.A013 | contig035381-NyeTARs.A015 | 0.068 | 0.139 | 0.488 |
| contig086337-BriTARs.A019 | contig045999-NyeTARs.A026 | 0.398 | 0.815 | 0.488 |
| contig056200-NyeTARs.A029 | contig066691-ZebTARs.A015 | 0.293 | 0.601 | 0.489 |
| contig022349-TiITARs.A035 | contig022375-TiITARs.A048 | 0.167 | 0.343 | 0.489 |
| contig020038-BurTAR.A002  | contig056023-BurTARs.A019 | 0.452 | 0.926 | 0.489 |
| contig007524-TiITARs.A026 | contig022324-TiITARs.A027 | 0.373 | 0.764 | 0.489 |
| contig035381-NyeTARs.A015 | contig056200-NyeTARs.A029 | 0.162 | 0.331 | 0.489 |
| contig059673-BurTARs.A016 | contig049540-BurTARs.A024 | 0.358 | 0.733 | 0.489 |
| contig007524-TiITARs.A026 | contig022375-TiITARs.A048 | 0.339 | 0.694 | 0.489 |
| contig062039-NyeTARs.A022 | contig022349-TiITARs.A035 | 0.286 | 0.584 | 0.489 |
| contig022353-TiITARs.A036 | contig066890-ZebTARs.A014 | 0.276 | 0.564 | 0.489 |
| contig035381-NyeTARs.A015 | contig030471-ZebTARs.A024 | 0.262 | 0.537 | 0.489 |
| contig056020-BurTARs.A021 | contig049540-BurTARs.A024 | 0.289 | 0.591 | 0.489 |

|                           |                           |       |       |       |
|---------------------------|---------------------------|-------|-------|-------|
| contig061410-ZebTARs.A021 | contig030440-ZebTARs.A029 | 0.135 | 0.276 | 0.489 |
| contig084880-BriTARs.A016 | contig058002-NyeTARs.A025 | 0.390 | 0.798 | 0.489 |
| contig086344-BriTARs.A020 | contig022362-TiITARs.A042 | 0.367 | 0.750 | 0.489 |
| contig045999-NyeTARs.A026 | contig053139-ZebTARs.A023 | 0.391 | 0.800 | 0.489 |
| contig022363-TiITARs.A044 | contig061417-ZebTARs.A020 | 0.170 | 0.348 | 0.489 |
| contig046013-NyeTARs.A021 | contig022357-TiITARs.A041 | 0.149 | 0.305 | 0.489 |
| contig042499-NyeTARs.A028 | contig022334-TiITARs.A029 | 0.362 | 0.740 | 0.489 |
| contig084887-BriTARs.A018 | contig022390-TiITARs.A055 | 0.235 | 0.480 | 0.489 |
| contig035377-NyeTARs.A023 | contig022353-TiITARs.A036 | 0.299 | 0.612 | 0.490 |
| contig022355-TiITARs.A039 | contig022390-TiITARs.A056 | 0.272 | 0.555 | 0.490 |
| contig056021-BurTARs.A020 | contig022357-TiITARs.A041 | 0.140 | 0.286 | 0.490 |
| contig084876-BriTARs.A015 | contig061433-BurTARs.A013 | 0.279 | 0.569 | 0.490 |
| contig061433-BurTARs.A013 | contig062677-ZebTARs.A018 | 0.310 | 0.633 | 0.490 |
| contig041024-BurTARs.A026 | contig022334-TiITARs.A030 | 0.171 | 0.350 | 0.490 |
| contig049534-BurTARs.A025 | contig034854-BurTARs.A027 | 0.288 | 0.589 | 0.490 |
| contig084880-BriTARs.A016 | contig022330-TiITARs.A028 | 0.186 | 0.380 | 0.490 |
| contig059673-BurTARs.A016 | contig030464-ZebTARs.A025 | 0.374 | 0.763 | 0.490 |
| contig060105-NyeTARs.A018 | contig022343-TiITARs.A033 | 0.347 | 0.708 | 0.490 |
| contig082565-BriTARs.A022 | contig022320-TiITARs.A059 | 0.245 | 0.499 | 0.490 |
| contig056021-BurTARs.A020 | contig042499-NyeTARs.A028 | 0.355 | 0.725 | 0.490 |
| contig035376-NyeTARs.A014 | contig046014-NyeTARs.A024 | 0.242 | 0.494 | 0.490 |
| contig057305-BurTARs.A031 | contig022355-TiITARs.A039 | 0.417 | 0.852 | 0.490 |
| contig046013-NyeTARs.A021 | contig022368-TiITARs.A047 | 0.162 | 0.331 | 0.490 |
| contig059673-BurTARs.A016 | contig062677-ZebTARs.A018 | 0.360 | 0.735 | 0.490 |
| contig022337-TiITARs.A031 | contig066890-ZebTARs.A014 | 0.289 | 0.590 | 0.490 |
| contig084876-BriTARs.A015 | contig082565-BriTARs.A022 | 0.142 | 0.290 | 0.490 |
| contig060707-BurTARs.A015 | contig022343-TiITARs.A033 | 0.341 | 0.696 | 0.490 |
| contig035375-NyeTARs.A013 | contig022377-TiITARs.A050 | 0.273 | 0.557 | 0.490 |
| contig039639-TiITAR.A001  | contig040586-ZebTAR.A002  | 0.042 | 0.086 | 0.490 |
| contig060292-NyeTARs.A027 | contig066285-ZebTARs.A016 | 0.448 | 0.914 | 0.490 |
| contig046013-NyeTARs.A021 | contig061417-ZebTARs.A020 | 0.127 | 0.258 | 0.490 |
| contig007524-TiITARs.A026 | contig022390-TiITARs.A055 | 0.346 | 0.706 | 0.490 |
| contig022349-TiITARs.A035 | contig022382-TiITARs.A053 | 0.298 | 0.608 | 0.490 |
| contig056020-BurTARs.A021 | contig045088-TiITARs.A057 | 0.379 | 0.772 | 0.490 |
| contig059673-BurTARs.A016 | contig022353-TiITARs.A036 | 0.401 | 0.817 | 0.490 |
| contig084880-BriTARs.A016 | contig022355-TiITARs.A039 | 0.182 | 0.371 | 0.490 |
| contig056023-BurTARs.A019 | contig055697-BurTARs.A022 | 0.403 | 0.821 | 0.491 |
| contig061091-BurTARs.A014 | contig062677-ZebTARs.A018 | 0.288 | 0.588 | 0.491 |
| contig041024-BurTARs.A026 | contig056200-NyeTARs.A029 | 0.265 | 0.541 | 0.491 |
| contig059673-BurTARs.A016 | contig045999-NyeTARs.A026 | 0.400 | 0.815 | 0.491 |
| contig056023-BurTARs.A019 | contig022368-TiITARs.A047 | 0.204 | 0.415 | 0.491 |
| contig035381-NyeTARs.A015 | contig022368-TiITARs.A046 | 0.255 | 0.521 | 0.491 |
| contig022368-TiITARs.A047 | contig022390-TiITARs.A055 | 0.267 | 0.543 | 0.491 |
| contig022357-TiITARs.A041 | contig022378-TiITARs.A051 | 0.272 | 0.554 | 0.491 |
| contig082565-BriTARs.A022 | contig060292-NyeTARs.A027 | 0.355 | 0.723 | 0.491 |
| contig049540-BurTARs.A024 | contig046014-NyeTARs.A024 | 0.268 | 0.546 | 0.491 |
| contig039640-TiITAR.A002  | contig039640-TiITAR.A003  | 0.044 | 0.089 | 0.491 |
| contig084876-BriTARs.A015 | contig022377-TiITARs.A050 | 0.259 | 0.527 | 0.491 |
| contig056021-BurTARs.A020 | contig007524-TiITARs.A026 | 0.336 | 0.684 | 0.491 |
| contig056021-BurTARs.A020 | contig066285-ZebTARs.A016 | 0.165 | 0.336 | 0.491 |
| contig059673-BurTARs.A016 | contig057148-BurTARs.A028 | 0.370 | 0.754 | 0.491 |
| contig042499-NyeTARs.A028 | contig022365-TiITARs.A045 | 0.384 | 0.782 | 0.491 |
| contig057148-BurTARs.A028 | contig007524-TiITARs.A026 | 0.358 | 0.728 | 0.491 |

|                           |                           |       |       |       |
|---------------------------|---------------------------|-------|-------|-------|
| contig007518-TiITARs.A019 | contig022354-TiITARs.A037 | 0.374 | 0.761 | 0.491 |
| contig007524-TiITARs.A026 | contig066691-ZebTARs.A015 | 0.370 | 0.752 | 0.491 |
| contig056021-BurTARs.A020 | contig045999-NyeTARs.A026 | 0.188 | 0.382 | 0.491 |
| contig056023-BurTARs.A019 | contig007512-TiITARs.A024 | 0.385 | 0.783 | 0.492 |
| contig062039-NyeTARs.A022 | contig022320-TiITARs.A059 | 0.254 | 0.516 | 0.492 |
| contig056200-NyeTARs.A029 | contig007518-TiITARs.A019 | 0.370 | 0.753 | 0.492 |
| contig086344-BriTARs.A020 | contig045999-NyeTARs.A026 | 0.395 | 0.803 | 0.492 |
| contig056023-BurTARs.A019 | contig022345-TiITARs.A034 | 0.187 | 0.381 | 0.492 |
| contig084880-BriTARs.A016 | contig066285-ZebTARs.A016 | 0.190 | 0.386 | 0.492 |
| contig046013-NyeTARs.A021 | contig022368-TiITARs.A046 | 0.141 | 0.286 | 0.492 |
| contig049540-BurTARs.A024 | contig046007-NyeTARs.A017 | 0.295 | 0.600 | 0.492 |
| contig007524-TiITARs.A026 | contig022363-TiITARs.A043 | 0.368 | 0.747 | 0.492 |
| contig035376-NyeTARs.A014 | contig022365-TiITARs.A045 | 0.266 | 0.542 | 0.492 |
| contig007518-TiITARs.A019 | contig007524-TiITARs.A026 | 0.251 | 0.510 | 0.492 |
| contig046014-NyeTARs.A024 | contig045999-NyeTARs.A026 | 0.176 | 0.358 | 0.492 |
| contig084876-BriTARs.A015 | contig022354-TiITARs.A037 | 0.229 | 0.466 | 0.492 |
| contig056200-NyeTARs.A029 | contig022368-TiITARs.A047 | 0.296 | 0.602 | 0.492 |
| contig022324-TiITARs.A027 | contig030445-ZebTARs.A026 | 0.274 | 0.557 | 0.492 |
| contig062677-ZebTARs.A018 | contig030471-ZebTARs.A024 | 0.285 | 0.578 | 0.492 |
| contig056200-NyeTARs.A029 | contig030445-ZebTARs.A026 | 0.160 | 0.325 | 0.492 |
| contig060105-NyeTARs.A018 | contig022353-TiITARs.A036 | 0.362 | 0.736 | 0.492 |
| contig061977-BurTARs.A012 | contig034854-BurTARs.A027 | 0.154 | 0.312 | 0.492 |
| contig041024-BurTARs.A026 | contig022378-TiITARs.A051 | 0.247 | 0.503 | 0.492 |
| contig086351-BriTARs.A021 | contig082565-BriTARs.A022 | 0.365 | 0.741 | 0.492 |
| contig045999-NyeTARs.A026 | contig022363-TiITARs.A044 | 0.220 | 0.447 | 0.492 |
| contig061977-BurTARs.A012 | contig022363-TiITARs.A043 | 0.272 | 0.551 | 0.492 |
| contig046011-NyeTARs.A016 | contig022349-TiITARs.A035 | 0.229 | 0.465 | 0.492 |
| contig022354-TiITARs.A037 | contig022377-TiITARs.A050 | 0.191 | 0.389 | 0.492 |
| contig058002-NyeTARs.A025 | contig030471-ZebTARs.A024 | 0.359 | 0.728 | 0.492 |
| contig086351-BriTARs.A021 | contig066691-ZebTARs.A015 | 0.417 | 0.846 | 0.493 |
| contig022383-TiITARs.A054 | contig045088-TiITARs.A057 | 0.356 | 0.722 | 0.493 |
| contig022368-TiITARs.A047 | contig066890-ZebTARs.A014 | 0.292 | 0.593 | 0.493 |
| contig057305-BurTARs.A031 | contig066691-ZebTARs.A015 | 0.410 | 0.832 | 0.493 |
| contig042499-NyeTARs.A028 | contig022357-TiITARs.A041 | 0.387 | 0.785 | 0.493 |
| contig084886-BriTARs.A017 | contig035375-NyeTARs.A013 | 0.272 | 0.551 | 0.493 |
| contig022345-TiITARs.A034 | contig022378-TiITARs.A051 | 0.244 | 0.496 | 0.493 |
| contig046007-NyeTARs.A017 | contig056200-NyeTARs.A029 | 0.292 | 0.592 | 0.493 |
| contig057301-BurTARs.A017 | contig022341-TiITARs.A032 | 0.373 | 0.757 | 0.493 |
| contig022334-TiITARs.A030 | contig022354-TiITARs.A037 | 0.151 | 0.305 | 0.493 |
| contig084886-BriTARs.A017 | contig022390-TiITARs.A056 | 0.271 | 0.550 | 0.493 |
| contig061977-BurTARs.A012 | contig022378-TiITARs.A051 | 0.202 | 0.410 | 0.493 |
| contig061977-BurTARs.A012 | contig046007-NyeTARs.A017 | 0.269 | 0.546 | 0.493 |
| contig046013-NyeTARs.A021 | contig042499-NyeTARs.A028 | 0.353 | 0.715 | 0.493 |
| contig084876-BriTARs.A015 | contig022357-TiITARs.A041 | 0.273 | 0.554 | 0.493 |
| contig022337-TiITARs.A031 | contig022382-TiITARs.A053 | 0.288 | 0.584 | 0.493 |
| contig057145-BurTARs.A018 | contig045088-TiITARs.A057 | 0.383 | 0.777 | 0.493 |
| contig056021-BurTARs.A020 | contig035375-NyeTARs.A013 | 0.272 | 0.551 | 0.493 |
| contig084880-BriTARs.A016 | contig022363-TiITARs.A044 | 0.218 | 0.442 | 0.493 |
| contig061977-BurTARs.A012 | contig007518-TiITARs.A019 | 0.334 | 0.678 | 0.493 |
| contig035377-NyeTARs.A023 | contig022354-TiITARs.A037 | 0.248 | 0.504 | 0.493 |
| contig056200-NyeTARs.A029 | contig022382-TiITARs.A053 | 0.013 | 0.026 | 0.494 |
| contig086351-BriTARs.A021 | contig061091-BurTARs.A014 | 0.417 | 0.844 | 0.494 |
| contig022354-TiITARs.A037 | contig066890-ZebTARs.A014 | 0.254 | 0.514 | 0.494 |

|                           |                           |       |       |       |
|---------------------------|---------------------------|-------|-------|-------|
| contig022355-TiITARs.A039 | contig030445-ZebTARs.A026 | 0.251 | 0.509 | 0.494 |
| contig057305-BurTARs.A031 | contig030440-ZebTARs.A029 | 0.358 | 0.726 | 0.494 |
| contig082565-BriTARs.A022 | contig022368-TiITARs.A046 | 0.262 | 0.532 | 0.494 |
| contig061091-BurTARs.A014 | contig057305-BurTARs.A031 | 0.410 | 0.830 | 0.494 |
| contig045088-TiITARs.A057 | contig030445-ZebTARs.A026 | 0.354 | 0.716 | 0.494 |
| contig046011-NyeTARs.A016 | contig007520-TiITARs.A025 | 0.409 | 0.828 | 0.494 |
| contig046013-NyeTARs.A021 | contig035377-NyeTARs.A023 | 0.286 | 0.578 | 0.494 |
| contig057305-BurTARs.A031 | contig022345-TiITARs.A034 | 0.385 | 0.778 | 0.494 |
| contig046011-NyeTARs.A016 | contig022368-TiITARs.A046 | 0.229 | 0.463 | 0.494 |
| contig035375-NyeTARs.A013 | contig007518-TiITARs.A019 | 0.356 | 0.719 | 0.494 |
| contig082565-BriTARs.A022 | contig035376-NyeTARs.A014 | 0.014 | 0.027 | 0.494 |
| contig022337-TiITARs.A031 | contig066691-ZebTARs.A015 | 0.117 | 0.237 | 0.494 |
| contig035377-NyeTARs.A023 | contig061417-ZebTARs.A020 | 0.263 | 0.532 | 0.495 |
| contig022365-TiITARs.A045 | contig062677-ZebTARs.A018 | 0.300 | 0.606 | 0.495 |
| contig061091-BurTARs.A014 | contig022383-TiITARs.A054 | 0.289 | 0.583 | 0.495 |
| contig066691-ZebTARs.A015 | contig030445-ZebTARs.A026 | 0.270 | 0.546 | 0.495 |
| contig007524-TiITARs.A026 | contig030464-ZebTARs.A025 | 0.366 | 0.739 | 0.495 |
| contig061433-BurTARs.A013 | contig059673-BurTARs.A016 | 0.410 | 0.828 | 0.495 |
| contig084876-BriTARs.A015 | contig062677-ZebTARs.A018 | 0.177 | 0.357 | 0.495 |
| contig022349-TiITARs.A035 | contig022368-TiITARs.A047 | 0.166 | 0.336 | 0.495 |
| contig060707-BurTARs.A015 | contig061417-ZebTARs.A020 | 0.339 | 0.685 | 0.495 |
| contig082565-BriTARs.A022 | contig034854-BurTARs.A027 | 0.056 | 0.112 | 0.495 |
| contig022337-TiITARs.A031 | contig022378-TiITARs.A051 | 0.262 | 0.530 | 0.495 |
| contig086351-BriTARs.A021 | contig022345-TiITARs.A034 | 0.385 | 0.777 | 0.495 |
| contig022334-TiITARs.A029 | contig022353-TiITARs.A036 | 0.129 | 0.260 | 0.495 |
| contig049540-BurTARs.A024 | contig022368-TiITARs.A047 | 0.294 | 0.594 | 0.495 |
| contig046007-NyeTARs.A017 | contig061410-ZebTARs.A021 | 0.267 | 0.538 | 0.496 |
| contig084880-BriTARs.A016 | contig060105-NyeTARs.A018 | 0.393 | 0.793 | 0.496 |
| contig034854-BurTARs.A027 | contig022356-TiITARs.A040 | 0.276 | 0.556 | 0.496 |
| contig045999-NyeTARs.A026 | contig066285-ZebTARs.A016 | 0.189 | 0.381 | 0.496 |
| contig086337-BriTARs.A019 | contig056023-BurTARs.A019 | 0.398 | 0.804 | 0.496 |
| contig046013-NyeTARs.A021 | contig007520-TiITARs.A025 | 0.361 | 0.728 | 0.496 |
| contig056200-NyeTARs.A029 | contig022320-TiITARs.A059 | 0.267 | 0.538 | 0.496 |
| contig046011-NyeTARs.A016 | contig022341-TiITARs.A032 | 0.240 | 0.485 | 0.496 |
| contig057148-BurTARs.A028 | contig022363-TiITARs.A044 | 0.186 | 0.376 | 0.496 |
| contig061091-BurTARs.A014 | contig056200-NyeTARs.A029 | 0.289 | 0.584 | 0.496 |
| contig022363-TiITARs.A044 | contig022368-TiITARs.A046 | 0.141 | 0.283 | 0.496 |
| contig082565-BriTARs.A022 | contig022383-TiITARs.A054 | 0.106 | 0.214 | 0.496 |
| contig056023-BurTARs.A019 | contig053139-ZebTARs.A023 | 0.391 | 0.789 | 0.496 |
| contig022356-TiITARs.A040 | contig022378-TiITARs.A051 | 0.267 | 0.537 | 0.496 |
| contig035375-NyeTARs.A013 | contig022334-TiITARs.A029 | 0.275 | 0.554 | 0.496 |
| contig034854-BurTARs.A027 | contig022349-TiITARs.A035 | 0.286 | 0.575 | 0.496 |
| contig007518-TiITARs.A019 | contig022341-TiITARs.A032 | 0.382 | 0.769 | 0.496 |
| contig022353-TiITARs.A036 | contig022357-TiITARs.A041 | 0.139 | 0.281 | 0.496 |
| contig022353-TiITARs.A036 | contig062676-ZebTARs.A019 | 0.275 | 0.554 | 0.496 |
| contig022334-TiITARs.A030 | contig045088-TiITARs.A057 | 0.374 | 0.754 | 0.496 |
| contig022363-TiITARs.A044 | contig066691-ZebTARs.A015 | 0.170 | 0.343 | 0.496 |
| contig034854-BurTARs.A027 | contig066285-ZebTARs.A016 | 0.290 | 0.584 | 0.496 |
| contig057301-BurTARs.A017 | contig041024-BurTARs.A026 | 0.349 | 0.704 | 0.496 |
| contig084876-BriTARs.A015 | contig035376-NyeTARs.A014 | 0.143 | 0.288 | 0.496 |
| contig084880-BriTARs.A016 | contig061417-ZebTARs.A020 | 0.194 | 0.391 | 0.497 |
| contig084887-BriTARs.A018 | contig060292-NyeTARs.A027 | 0.406 | 0.818 | 0.497 |
| contig057305-BurTARs.A031 | contig022363-TiITARs.A043 | 0.459 | 0.925 | 0.497 |

|                           |                           |       |       |       |
|---------------------------|---------------------------|-------|-------|-------|
| contig045999-NyeTARs.A026 | contig022357-TiITARs.A041 | 0.189 | 0.381 | 0.497 |
| contig084887-BriTARs.A018 | contig007524-TiITARs.A026 | 0.360 | 0.724 | 0.497 |
| contig035375-NyeTARs.A013 | contig058002-NyeTARs.A025 | 0.333 | 0.671 | 0.497 |
| contig022363-TiITARs.A043 | contig022375-TiITARs.A048 | 0.132 | 0.266 | 0.497 |
| contig035381-NyeTARs.A015 | contig022353-TiITARs.A036 | 0.290 | 0.583 | 0.497 |
| contig082565-BriTARs.A022 | contig022365-TiITARs.A045 | 0.271 | 0.546 | 0.497 |
| contig035377-NyeTARs.A023 | contig045999-NyeTARs.A026 | 0.290 | 0.584 | 0.497 |
| contig060105-NyeTARs.A018 | contig042499-NyeTARs.A028 | 0.323 | 0.649 | 0.497 |
| contig084887-BriTARs.A018 | contig022383-TiITARs.A054 | 0.292 | 0.588 | 0.497 |
| contig057305-BurTARs.A031 | contig066285-ZebTARs.A016 | 0.448 | 0.901 | 0.497 |
| contig022355-TiITARs.A039 | contig045088-TiITARs.A057 | 0.380 | 0.765 | 0.497 |
| contig034854-BurTARs.A027 | contig007518-TiITARs.A019 | 0.370 | 0.744 | 0.497 |
| contig007518-TiITARs.A019 | contig022363-TiITARs.A043 | 0.401 | 0.807 | 0.497 |
| contig059673-BurTARs.A016 | contig056200-NyeTARs.A029 | 0.360 | 0.725 | 0.497 |
| contig042499-NyeTARs.A028 | contig022375-TiITARs.A048 | 0.376 | 0.757 | 0.497 |
| contig022368-TiITARs.A046 | contig030445-ZebTARs.A026 | 0.252 | 0.506 | 0.497 |
| contig046013-NyeTARs.A021 | contig022356-TiITARs.A040 | 0.128 | 0.258 | 0.497 |
| contig066285-ZebTARs.A016 | contig061417-ZebTARs.A020 | 0.168 | 0.338 | 0.497 |
| contig084876-BriTARs.A015 | contig022324-TiITARs.A027 | 0.271 | 0.545 | 0.497 |
| contig056200-NyeTARs.A029 | contig030471-ZebTARs.A024 | 0.286 | 0.574 | 0.498 |
| contig022375-TiITARs.A048 | contig022390-TiITARs.A056 | 0.244 | 0.491 | 0.498 |
| contig046013-NyeTARs.A021 | contig022375-TiITARs.A048 | 0.155 | 0.312 | 0.498 |
| contig022362-TiITARs.A042 | contig030471-ZebTARs.A024 | 0.150 | 0.301 | 0.498 |
| contig086351-BriTARs.A021 | contig066285-ZebTARs.A016 | 0.454 | 0.912 | 0.498 |
| contig041024-BurTARs.A026 | contig022382-TiITARs.A053 | 0.259 | 0.520 | 0.498 |
| contig022375-TiITARs.A048 | contig066890-ZebTARs.A014 | 0.256 | 0.514 | 0.498 |
| contig056021-BurTARs.A020 | contig022363-TiITARs.A044 | 0.177 | 0.355 | 0.498 |
| contig022356-TiITARs.A040 | contig045088-TiITARs.A057 | 0.381 | 0.764 | 0.498 |
| contig086337-BriTARs.A019 | contig055697-BurTARs.A022 | 0.016 | 0.031 | 0.498 |
| contig084887-BriTARs.A018 | contig062677-ZebTARs.A018 | 0.286 | 0.574 | 0.498 |
| contig061433-BurTARs.A013 | contig049540-BurTARs.A024 | 0.309 | 0.620 | 0.498 |
| contig022345-TiITARs.A034 | contig022353-TiITARs.A036 | 0.149 | 0.298 | 0.498 |
| contig035376-NyeTARs.A014 | contig042499-NyeTARs.A028 | 0.358 | 0.717 | 0.499 |
| contig060292-NyeTARs.A027 | contig022345-TiITARs.A034 | 0.386 | 0.774 | 0.499 |
| contig022343-TiITARs.A033 | contig022368-TiITARs.A047 | 0.150 | 0.301 | 0.499 |
| contig022355-TiITARs.A039 | contig030440-ZebTARs.A029 | 0.266 | 0.533 | 0.499 |
| contig062039-NyeTARs.A022 | contig046014-NyeTARs.A024 | 0.259 | 0.519 | 0.499 |
| contig060292-NyeTARs.A027 | contig030440-ZebTARs.A029 | 0.359 | 0.721 | 0.499 |
| contig086344-BriTARs.A020 | contig056023-BurTARs.A019 | 0.395 | 0.792 | 0.499 |
| contig046007-NyeTARs.A017 | contig022383-TiITARs.A054 | 0.278 | 0.556 | 0.499 |
| contig082565-BriTARs.A022 | contig049540-BurTARs.A024 | 0.161 | 0.323 | 0.499 |
| contig084886-BriTARs.A017 | contig034854-BurTARs.A027 | 0.278 | 0.557 | 0.499 |
| contig022357-TiITARs.A041 | contig045088-TiITARs.A057 | 0.386 | 0.773 | 0.499 |
| contig057301-BurTARs.A017 | contig022363-TiITARs.A044 | 0.387 | 0.775 | 0.499 |
| contig022362-TiITARs.A042 | contig066691-ZebTARs.A015 | 0.162 | 0.325 | 0.499 |
| contig062039-NyeTARs.A022 | contig022330-TiITARs.A028 | 0.252 | 0.506 | 0.499 |
| contig025313-BriTAR.A002  | contig032272-NyeTAR.A004  | 0.011 | 0.022 | 0.499 |
| contig057301-BurTARs.A017 | contig022365-TiITARs.A045 | 0.384 | 0.770 | 0.499 |
| contig057145-BurTARs.A018 | contig042499-NyeTARs.A028 | 0.377 | 0.755 | 0.499 |
| contig082565-BriTARs.A022 | contig030440-ZebTARs.A029 | 0.070 | 0.140 | 0.499 |
| contig022378-TiITARs.A051 | contig061417-ZebTARs.A020 | 0.246 | 0.494 | 0.499 |
| contig084876-BriTARs.A015 | contig022382-TiITARs.A053 | 0.165 | 0.331 | 0.499 |
| contig084868-BriTARs.A014 | contig057301-BurTARs.A017 | 0.373 | 0.748 | 0.499 |



|                           |                           |       |       |       |
|---------------------------|---------------------------|-------|-------|-------|
| contig056020-BurTARs.A021 | contig022334-TiITARs.A030 | 0.183 | 0.367 | 0.499 |
| contig035376-NyeTARs.A014 | contig022368-TiITARs.A047 | 0.277 | 0.555 | 0.499 |
| contig030445-ZebTARs.A026 | contig030440-ZebTARs.A029 | 0.070 | 0.140 | 0.500 |
| contig046013-NyeTARs.A021 | contig045088-TiITARs.A057 | 0.360 | 0.721 | 0.500 |
| contig007520-TiITARs.A025 | contig066285-ZebTARs.A016 | 0.386 | 0.773 | 0.500 |
| contig056020-BurTARs.A021 | contig056200-NyeTARs.A029 | 0.291 | 0.583 | 0.500 |
| contig084887-BriTARs.A018 | contig082565-BriTARs.A022 | 0.273 | 0.547 | 0.500 |
| contig084876-BriTARs.A015 | contig030440-ZebTARs.A029 | 0.145 | 0.289 | 0.500 |
| contig061977-BurTARs.A012 | contig066691-ZebTARs.A015 | 0.267 | 0.535 | 0.500 |
| contig022330-TiITARs.A028 | contig022349-TiITARs.A035 | 0.162 | 0.325 | 0.500 |
| contig045999-NyeTARs.A026 | contig062676-ZebTARs.A019 | 0.273 | 0.546 | 0.500 |
| contig022355-TiITARs.A039 | contig022379-TiITARs.A052 | 0.251 | 0.503 | 0.500 |
| contig034854-BurTARs.A027 | contig007524-TiITARs.A026 | 0.353 | 0.706 | 0.500 |
| contig034854-BurTARs.A027 | contig022378-TiITARs.A051 | 0.245 | 0.490 | 0.500 |
| contig082565-BriTARs.A022 | contig022368-TiITARs.A047 | 0.276 | 0.551 | 0.500 |
| contig059673-BurTARs.A016 | contig030440-ZebTARs.A029 | 0.353 | 0.706 | 0.500 |
| contig084886-BriTARs.A017 | contig030445-ZebTARs.A026 | 0.250 | 0.500 | 0.500 |
| contig084880-BriTARs.A016 | contig062039-NyeTARs.A022 | 0.302 | 0.603 | 0.500 |
| contig046011-NyeTARs.A016 | contig046007-NyeTARs.A017 | 0.246 | 0.492 | 0.500 |
| contig056200-NyeTARs.A029 | contig022349-TiITARs.A035 | 0.309 | 0.616 | 0.501 |
| contig062039-NyeTARs.A022 | contig045999-NyeTARs.A026 | 0.303 | 0.605 | 0.501 |
| contig059673-BurTARs.A016 | contig046014-NyeTARs.A024 | 0.356 | 0.710 | 0.501 |
| contig045999-NyeTARs.A026 | contig022355-TiITARs.A039 | 0.182 | 0.363 | 0.501 |
| contig022353-TiITARs.A036 | contig045088-TiITARs.A057 | 0.356 | 0.710 | 0.501 |
| contig022357-TiITARs.A041 | contig066890-ZebTARs.A014 | 0.277 | 0.552 | 0.501 |
| contig082565-BriTARs.A022 | contig061091-BurTARs.A014 | 0.275 | 0.549 | 0.501 |
| contig084868-BriTARs.A014 | contig046007-NyeTARs.A017 | 0.289 | 0.577 | 0.501 |
| contig022334-TiITARs.A030 | contig030471-ZebTARs.A024 | 0.186 | 0.372 | 0.501 |
| contig022334-TiITARs.A030 | contig022320-TiITARs.A059 | 0.172 | 0.343 | 0.501 |
| contig046013-NyeTARs.A021 | contig062677-ZebTARs.A018 | 0.297 | 0.593 | 0.501 |
| contig035375-NyeTARs.A013 | contig022343-TiITARs.A033 | 0.264 | 0.526 | 0.501 |
| contig062039-NyeTARs.A022 | contig022368-TiITARs.A047 | 0.286 | 0.571 | 0.501 |
| contig046014-NyeTARs.A024 | contig056200-NyeTARs.A029 | 0.270 | 0.539 | 0.502 |
| contig057301-BurTARs.A017 | contig022355-TiITARs.A039 | 0.379 | 0.756 | 0.502 |
| contig059673-BurTARs.A016 | contig056021-BurTARs.A020 | 0.347 | 0.691 | 0.502 |
| contig022363-TiITARs.A043 | contig030471-ZebTARs.A024 | 0.164 | 0.328 | 0.502 |
| contig049540-BurTARs.A024 | contig022354-TiITARs.A037 | 0.257 | 0.512 | 0.502 |
| contig035375-NyeTARs.A013 | contig061417-ZebTARs.A020 | 0.273 | 0.544 | 0.502 |
| contig060105-NyeTARs.A018 | contig045088-TiITARs.A057 | 0.329 | 0.656 | 0.502 |
| contig086351-BriTARs.A021 | contig022324-TiITARs.A027 | 0.431 | 0.859 | 0.502 |
| contig057301-BurTARs.A017 | contig022330-TiITARs.A028 | 0.370 | 0.737 | 0.502 |
| contig046013-NyeTARs.A021 | contig058002-NyeTARs.A025 | 0.362 | 0.721 | 0.502 |
| contig035376-NyeTARs.A014 | contig022363-TiITARs.A044 | 0.236 | 0.470 | 0.502 |
| contig082565-BriTARs.A022 | contig046014-NyeTARs.A024 | 0.247 | 0.491 | 0.502 |
| contig056023-BurTARs.A019 | contig045999-NyeTARs.A026 | 0.006 | 0.011 | 0.502 |
| contig046014-NyeTARs.A024 | contig045088-TiITARs.A057 | 0.350 | 0.697 | 0.502 |
| contig086344-BriTARs.A020 | contig061417-ZebTARs.A020 | 0.347 | 0.691 | 0.502 |
| contig035376-NyeTARs.A014 | contig066691-ZebTARs.A015 | 0.277 | 0.551 | 0.502 |
| contig022330-TiITARs.A028 | contig022390-TiITARs.A056 | 0.261 | 0.520 | 0.502 |
| contig035377-NyeTARs.A023 | contig062677-ZebTARs.A018 | 0.191 | 0.381 | 0.502 |
| contig084887-BriTARs.A018 | contig022334-TiITARs.A030 | 0.179 | 0.356 | 0.503 |
| contig022365-TiITARs.A045 | contig030440-ZebTARs.A029 | 0.290 | 0.578 | 0.503 |
| contig056023-BurTARs.A019 | contig062039-NyeTARs.A022 | 0.298 | 0.592 | 0.503 |

|                           |                           |       |       |       |
|---------------------------|---------------------------|-------|-------|-------|
| contig034854-BurTARs.A027 | contig022330-TiITARs.A028 | 0.274 | 0.546 | 0.503 |
| contig046011-NyeTARs.A016 | contig022390-TiITARs.A055 | 0.294 | 0.584 | 0.503 |
| contig022378-TiITARs.A051 | contig030440-ZebTARs.A029 | 0.251 | 0.499 | 0.503 |
| contig042499-NyeTARs.A028 | contig061417-ZebTARs.A020 | 0.359 | 0.714 | 0.503 |
| contig084887-BriTARs.A018 | contig030445-ZebTARs.A026 | 0.262 | 0.521 | 0.503 |
| contig057301-BurTARs.A017 | contig022383-TiITARs.A054 | 0.367 | 0.730 | 0.503 |
| contig046011-NyeTARs.A016 | contig046014-NyeTARs.A024 | 0.221 | 0.440 | 0.503 |
| contig084868-BriTARs.A014 | contig042499-NyeTARs.A028 | 0.374 | 0.744 | 0.503 |
| contig046007-NyeTARs.A017 | contig022382-TiITARs.A053 | 0.284 | 0.565 | 0.503 |
| contig022382-TiITARs.A053 | contig022320-TiITARs.A059 | 0.260 | 0.517 | 0.503 |
| contig057301-BurTARs.A017 | contig022334-TiITARs.A029 | 0.367 | 0.729 | 0.503 |
| contig022357-TiITARs.A041 | contig022383-TiITARs.A054 | 0.272 | 0.539 | 0.504 |
| contig061091-BurTARs.A014 | contig059673-BurTARs.A016 | 0.375 | 0.744 | 0.504 |
| contig057301-BurTARs.A017 | contig035376-NyeTARs.A014 | 0.364 | 0.723 | 0.504 |
| contig084887-BriTARs.A018 | contig057305-BurTARs.A031 | 0.406 | 0.807 | 0.504 |
| contig046011-NyeTARs.A016 | contig022320-TiITARs.A059 | 0.220 | 0.437 | 0.504 |
| contig084880-BriTARs.A016 | contig030471-ZebTARs.A024 | 0.185 | 0.367 | 0.504 |
| contig049540-BurTARs.A024 | contig022365-TiITARs.A045 | 0.299 | 0.593 | 0.504 |
| contig022368-TiITARs.A047 | contig022378-TiITARs.A051 | 0.270 | 0.536 | 0.504 |
| contig022363-TiITARs.A044 | contig030471-ZebTARs.A024 | 0.180 | 0.357 | 0.504 |
| contig061433-BurTARs.A013 | contig035376-NyeTARs.A014 | 0.278 | 0.552 | 0.504 |
| contig035375-NyeTARs.A013 | contig022354-TiITARs.A037 | 0.257 | 0.511 | 0.504 |
| contig056021-BurTARs.A020 | contig062676-ZebTARs.A019 | 0.257 | 0.510 | 0.504 |
| contig061977-BurTARs.A012 | contig057301-BurTARs.A017 | 0.344 | 0.683 | 0.504 |
| contig057305-BurTARs.A031 | contig022324-TiITARs.A027 | 0.423 | 0.839 | 0.504 |
| contig022353-TiITARs.A036 | contig022382-TiITARs.A053 | 0.265 | 0.526 | 0.504 |
| contig061091-BurTARs.A014 | contig022363-TiITARs.A044 | 0.167 | 0.330 | 0.504 |
| contig082565-BriTARs.A022 | contig056200-NyeTARs.A029 | 0.163 | 0.323 | 0.504 |
| contig056020-BurTARs.A021 | contig062676-ZebTARs.A019 | 0.267 | 0.529 | 0.504 |
| contig084886-BriTARs.A017 | contig022375-TiITARs.A048 | 0.171 | 0.339 | 0.504 |
| contig084876-BriTARs.A015 | contig007518-TiITARs.A019 | 0.342 | 0.677 | 0.504 |
| contig066890-ZebTARs.A014 | contig066691-ZebTARs.A015 | 0.288 | 0.571 | 0.504 |
| contig042499-NyeTARs.A028 | contig022355-TiITARs.A039 | 0.377 | 0.747 | 0.504 |
| contig056023-BurTARs.A019 | contig022365-TiITARs.A045 | 0.186 | 0.368 | 0.504 |
| contig022334-TiITARs.A029 | contig022337-TiITARs.A031 | 0.119 | 0.236 | 0.504 |
| contig007524-TiITARs.A026 | contig061417-ZebTARs.A020 | 0.338 | 0.671 | 0.505 |
| contig035376-NyeTARs.A014 | contig030440-ZebTARs.A029 | 0.072 | 0.143 | 0.505 |
| contig022357-TiITARs.A041 | contig022379-TiITARs.A052 | 0.273 | 0.541 | 0.505 |
| contig056021-BurTARs.A020 | contig022378-TiITARs.A051 | 0.254 | 0.503 | 0.505 |
| contig084887-BriTARs.A018 | contig022362-TiITARs.A042 | 0.159 | 0.314 | 0.505 |
| contig022349-TiITARs.A035 | contig030471-ZebTARs.A024 | 0.148 | 0.293 | 0.505 |
| contig061433-BurTARs.A013 | contig066890-ZebTARs.A014 | 0.296 | 0.587 | 0.505 |
| contig059673-BurTARs.A016 | contig056020-BurTARs.A021 | 0.406 | 0.805 | 0.505 |
| contig022353-TiITARs.A036 | contig022379-TiITARs.A052 | 0.249 | 0.493 | 0.505 |
| contig022324-TiITARs.A027 | contig045088-TiITARs.A057 | 0.394 | 0.780 | 0.505 |
| contig061977-BurTARs.A012 | contig042499-NyeTARs.A028 | 0.339 | 0.670 | 0.505 |
| contig084886-BriTARs.A017 | contig035376-NyeTARs.A014 | 0.259 | 0.512 | 0.505 |
| contig022365-TiITARs.A045 | contig030445-ZebTARs.A026 | 0.266 | 0.526 | 0.505 |
| contig022375-TiITARs.A048 | contig030464-ZebTARs.A025 | 0.173 | 0.342 | 0.506 |
| contig049534-BurTARs.A025 | contig007524-TiITARs.A026 | 0.384 | 0.759 | 0.506 |
| contig042499-NyeTARs.A028 | contig022378-TiITARs.A051 | 0.357 | 0.707 | 0.506 |
| contig007518-TiITARs.A019 | contig062677-ZebTARs.A018 | 0.376 | 0.744 | 0.506 |
| contig035377-NyeTARs.A023 | contig045088-TiITARs.A057 | 0.381 | 0.753 | 0.506 |

|                           |                           |       |       |       |
|---------------------------|---------------------------|-------|-------|-------|
| contig084880-BriTARs.A016 | contig035381-NyeTARs.A015 | 0.298 | 0.588 | 0.506 |
| contig062039-NyeTARs.A022 | contig022375-TiITARs.A048 | 0.244 | 0.482 | 0.506 |
| contig056020-BurTARs.A021 | contig022382-TiITARs.A053 | 0.281 | 0.555 | 0.506 |
| contig084876-BriTARs.A015 | contig022355-TiITARs.A039 | 0.265 | 0.524 | 0.506 |
| contig035375-NyeTARs.A013 | contig022378-TiITARs.A051 | 0.253 | 0.499 | 0.506 |
| contig045088-TiITARs.A057 | contig062676-ZebTARs.A019 | 0.367 | 0.725 | 0.506 |
| contig057301-BurTARs.A017 | contig030445-ZebTARs.A026 | 0.352 | 0.695 | 0.507 |
| contig084887-BriTARs.A018 | contig086351-BriTARs.A021 | 0.416 | 0.821 | 0.507 |
| contig022334-TiITARs.A029 | contig066890-ZebTARs.A014 | 0.270 | 0.533 | 0.507 |
| contig084876-BriTARs.A015 | contig049540-BurTARs.A024 | 0.175 | 0.345 | 0.507 |
| contig061977-BurTARs.A012 | contig022353-TiITARs.A036 | 0.277 | 0.547 | 0.507 |
| contig057301-BurTARs.A017 | contig022378-TiITARs.A051 | 0.358 | 0.706 | 0.507 |
| contig022324-TiITARs.A027 | contig022382-TiITARs.A053 | 0.297 | 0.585 | 0.507 |
| contig022362-TiITARs.A042 | contig066890-ZebTARs.A014 | 0.282 | 0.557 | 0.507 |
| contig056023-BurTARs.A019 | contig062676-ZebTARs.A019 | 0.273 | 0.539 | 0.507 |
| contig022363-TiITARs.A043 | contig066691-ZebTARs.A015 | 0.167 | 0.329 | 0.507 |
| contig084886-BriTARs.A017 | contig082565-BriTARs.A022 | 0.259 | 0.511 | 0.507 |
| contig035375-NyeTARs.A013 | contig022379-TiITARs.A052 | 0.144 | 0.283 | 0.507 |
| contig022341-TiITARs.A032 | contig022353-TiITARs.A036 | 0.149 | 0.293 | 0.507 |
| contig061977-BurTARs.A012 | contig061091-BurTARs.A014 | 0.263 | 0.519 | 0.507 |
| contig061091-BurTARs.A014 | contig022362-TiITARs.A042 | 0.159 | 0.313 | 0.507 |
| contig022368-TiITARs.A047 | contig022382-TiITARs.A053 | 0.289 | 0.571 | 0.507 |
| contig084886-BriTARs.A017 | contig022363-TiITARs.A043 | 0.199 | 0.393 | 0.507 |
| contig022357-TiITARs.A041 | contig022390-TiITARs.A056 | 0.269 | 0.530 | 0.507 |
| contig022363-TiITARs.A044 | contig030440-ZebTARs.A029 | 0.252 | 0.497 | 0.507 |
| contig042499-NyeTARs.A028 | contig030445-ZebTARs.A026 | 0.351 | 0.691 | 0.507 |
| contig082565-BriTARs.A022 | contig022375-TiITARs.A048 | 0.222 | 0.438 | 0.507 |
| contig022362-TiITARs.A042 | contig022379-TiITARs.A052 | 0.251 | 0.495 | 0.507 |
| contig022362-TiITARs.A042 | contig022378-TiITARs.A051 | 0.265 | 0.522 | 0.507 |
| contig022334-TiITARs.A030 | contig066691-ZebTARs.A015 | 0.191 | 0.376 | 0.507 |
| contig007524-TiITARs.A026 | contig030471-ZebTARs.A024 | 0.359 | 0.708 | 0.507 |
| contig084887-BriTARs.A018 | contig049540-BurTARs.A024 | 0.285 | 0.561 | 0.508 |
| contig034854-BurTARs.A027 | contig022334-TiITARs.A029 | 0.272 | 0.535 | 0.508 |
| contig046007-NyeTARs.A017 | contig022334-TiITARs.A030 | 0.191 | 0.377 | 0.508 |
| contig057301-BurTARs.A017 | contig060105-NyeTARs.A018 | 0.330 | 0.650 | 0.508 |
| contig022378-TiITARs.A051 | contig061410-ZebTARs.A021 | 0.205 | 0.403 | 0.508 |
| contig035376-NyeTARs.A014 | contig022355-TiITARs.A039 | 0.261 | 0.514 | 0.508 |
| contig084887-BriTARs.A018 | contig059673-BurTARs.A016 | 0.369 | 0.727 | 0.508 |
| contig056021-BurTARs.A020 | contig022353-TiITARs.A036 | 0.141 | 0.278 | 0.508 |
| contig022334-TiITARs.A030 | contig022343-TiITARs.A033 | 0.188 | 0.371 | 0.508 |
| contig042499-NyeTARs.A028 | contig022341-TiITARs.A032 | 0.378 | 0.744 | 0.508 |
| contig061433-BurTARs.A013 | contig022390-TiITARs.A056 | 0.290 | 0.571 | 0.508 |
| contig046011-NyeTARs.A016 | contig022383-TiITARs.A054 | 0.302 | 0.595 | 0.508 |
| contig056023-BurTARs.A019 | contig022368-TiITARs.A046 | 0.195 | 0.384 | 0.508 |
| contig086351-BriTARs.A021 | contig007518-TiITARs.A019 | 0.299 | 0.588 | 0.508 |
| contig046014-NyeTARs.A024 | contig007524-TiITARs.A026 | 0.341 | 0.670 | 0.508 |
| contig062039-NyeTARs.A022 | contig022368-TiITARs.A046 | 0.267 | 0.525 | 0.508 |
| contig062676-ZebTARs.A019 | contig030471-ZebTARs.A024 | 0.269 | 0.528 | 0.508 |
| contig086351-BriTARs.A021 | contig022341-TiITARs.A032 | 0.411 | 0.807 | 0.509 |
| contig022337-TiITARs.A031 | contig022390-TiITARs.A056 | 0.286 | 0.562 | 0.509 |
| contig007518-TiITARs.A019 | contig030440-ZebTARs.A029 | 0.360 | 0.707 | 0.509 |
| contig046014-NyeTARs.A024 | contig042499-NyeTARs.A028 | 0.352 | 0.691 | 0.509 |
| contig045999-NyeTARs.A026 | contig022356-TiITARs.A040 | 0.191 | 0.376 | 0.509 |

|                           |                           |       |       |       |
|---------------------------|---------------------------|-------|-------|-------|
| contig056020-BurTARs.A021 | contig066890-ZebTARs.A014 | 0.284 | 0.559 | 0.509 |
| contig060707-BurTARs.A015 | contig045999-NyeTARs.A026 | 0.389 | 0.765 | 0.509 |
| contig061433-BurTARs.A013 | contig056200-NyeTARs.A029 | 0.311 | 0.612 | 0.509 |
| contig060105-NyeTARs.A018 | contig061417-ZebTARs.A020 | 0.345 | 0.679 | 0.509 |
| contig046007-NyeTARs.A017 | contig022378-TiITARs.A051 | 0.262 | 0.514 | 0.509 |
| contig022330-TiITARs.A028 | contig062676-ZebTARs.A019 | 0.259 | 0.509 | 0.509 |
| contig035376-NyeTARs.A014 | contig022362-TiITARs.A042 | 0.268 | 0.526 | 0.509 |
| contig059673-BurTARs.A016 | contig061417-ZebTARs.A020 | 0.345 | 0.677 | 0.509 |
| contig084887-BriTARs.A018 | contig066890-ZebTARs.A014 | 0.284 | 0.557 | 0.509 |
| contig061091-BurTARs.A014 | contig030445-ZebTARs.A026 | 0.266 | 0.522 | 0.509 |
| contig045088-TiITARs.A057 | contig061417-ZebTARs.A020 | 0.366 | 0.719 | 0.509 |
| contig056023-BurTARs.A019 | contig022355-TiITARs.A039 | 0.182 | 0.357 | 0.509 |
| contig082565-BriTARs.A022 | contig030445-ZebTARs.A026 | 0.019 | 0.037 | 0.510 |
| contig022375-TiITARs.A048 | contig045088-TiITARs.A057 | 0.380 | 0.745 | 0.510 |
| contig082565-BriTARs.A022 | contig022324-TiITARs.A027 | 0.282 | 0.553 | 0.510 |
| contig022357-TiITARs.A041 | contig030440-ZebTARs.A029 | 0.287 | 0.562 | 0.510 |
| contig022353-TiITARs.A036 | contig022363-TiITARs.A044 | 0.163 | 0.320 | 0.510 |
| contig035381-NyeTARs.A015 | contig046007-NyeTARs.A017 | 0.274 | 0.537 | 0.510 |
| contig022362-TiITARs.A042 | contig030440-ZebTARs.A029 | 0.283 | 0.555 | 0.510 |
| contig035376-NyeTARs.A014 | contig022324-TiITARs.A027 | 0.282 | 0.553 | 0.510 |
| contig057301-BurTARs.A017 | contig056021-BurTARs.A020 | 0.365 | 0.716 | 0.510 |
| contig035381-NyeTARs.A015 | contig046011-NyeTARs.A016 | 0.288 | 0.564 | 0.510 |
| contig035376-NyeTARs.A014 | contig022375-TiITARs.A048 | 0.222 | 0.434 | 0.510 |
| contig049540-BurTARs.A024 | contig046013-NyeTARs.A021 | 0.296 | 0.580 | 0.510 |
| contig066890-ZebTARs.A014 | contig061410-ZebTARs.A021 | 0.163 | 0.319 | 0.510 |
| contig046013-NyeTARs.A021 | contig022362-TiITARs.A042 | 0.163 | 0.320 | 0.510 |
| contig057301-BurTARs.A017 | contig057145-BurTARs.A018 | 0.387 | 0.757 | 0.510 |
| contig084868-BriTARs.A014 | contig046013-NyeTARs.A021 | 0.310 | 0.606 | 0.510 |
| contig022334-TiITARs.A029 | contig022349-TiITARs.A035 | 0.165 | 0.323 | 0.510 |
| contig061433-BurTARs.A013 | contig007520-TiITARs.A025 | 0.390 | 0.764 | 0.511 |
| contig022362-TiITARs.A042 | contig022363-TiITARs.A044 | 0.158 | 0.310 | 0.511 |
| contig084886-BriTARs.A017 | contig056020-BurTARs.A021 | 0.167 | 0.326 | 0.511 |
| contig056023-BurTARs.A019 | contig066285-ZebTARs.A016 | 0.190 | 0.372 | 0.511 |
| contig054630-BurTARs.A023 | contig022363-TiITARs.A043 | 0.392 | 0.767 | 0.511 |
| contig056023-BurTARs.A019 | contig035377-NyeTARs.A023 | 0.287 | 0.563 | 0.511 |
| contig082565-BriTARs.A022 | contig022362-TiITARs.A042 | 0.274 | 0.537 | 0.511 |
| contig084876-BriTARs.A015 | contig061977-BurTARs.A012 | 0.013 | 0.025 | 0.511 |
| contig022354-TiITARs.A037 | contig062677-ZebTARs.A018 | 0.260 | 0.508 | 0.511 |
| contig056023-BurTARs.A019 | contig046014-NyeTARs.A024 | 0.175 | 0.343 | 0.511 |
| contig049540-BurTARs.A024 | contig022349-TiITARs.A035 | 0.307 | 0.600 | 0.511 |
| contig059673-BurTARs.A016 | contig007518-TiITARs.A019 | 0.261 | 0.510 | 0.511 |
| contig084887-BriTARs.A018 | contig035376-NyeTARs.A014 | 0.268 | 0.523 | 0.511 |
| contig046014-NyeTARs.A024 | contig022334-TiITARs.A030 | 0.173 | 0.339 | 0.511 |
| contig066691-ZebTARs.A015 | contig061410-ZebTARs.A021 | 0.270 | 0.527 | 0.511 |
| contig046014-NyeTARs.A024 | contig022349-TiITARs.A035 | 0.143 | 0.280 | 0.511 |
| contig022337-TiITARs.A031 | contig022354-TiITARs.A037 | 0.192 | 0.374 | 0.511 |
| contig056023-BurTARs.A019 | contig022363-TiITARs.A044 | 0.222 | 0.434 | 0.511 |
| contig022362-TiITARs.A042 | contig022365-TiITARs.A045 | 0.110 | 0.214 | 0.511 |
| contig035377-NyeTARs.A023 | contig022383-TiITARs.A054 | 0.095 | 0.186 | 0.511 |
| contig022363-TiITARs.A044 | contig022378-TiITARs.A051 | 0.237 | 0.463 | 0.512 |
| contig084880-BriTARs.A016 | contig022334-TiITARs.A029 | 0.188 | 0.368 | 0.512 |
| contig022357-TiITARs.A041 | contig022368-TiITARs.A047 | 0.156 | 0.305 | 0.512 |
| contig056020-BurTARs.A021 | contig030440-ZebTARs.A029 | 0.273 | 0.533 | 0.512 |

|                           |                           |       |       |       |
|---------------------------|---------------------------|-------|-------|-------|
| contig084880-BriTARs.A016 | contig049534-BurTARs.A025 | 0.190 | 0.371 | 0.512 |
| contig084876-BriTARs.A015 | contig056200-NyeTARs.A029 | 0.177 | 0.345 | 0.512 |
| contig059673-BurTARs.A016 | contig062039-NyeTARs.A022 | 0.346 | 0.676 | 0.512 |
| contig061091-BurTARs.A014 | contig066890-ZebTARs.A014 | 0.284 | 0.555 | 0.512 |
| contig056021-BurTARs.A020 | contig034854-BurTARs.A027 | 0.274 | 0.534 | 0.512 |
| contig062039-NyeTARs.A022 | contig022355-TiITARs.A039 | 0.261 | 0.510 | 0.512 |
| contig082565-BriTARs.A022 | contig022357-TiITARs.A041 | 0.282 | 0.551 | 0.512 |
| contig082565-BriTARs.A022 | contig030471-ZebTARs.A024 | 0.265 | 0.518 | 0.512 |
| contig056020-BurTARs.A021 | contig022390-TiITARs.A056 | 0.278 | 0.543 | 0.513 |
| contig042499-NyeTARs.A028 | contig022334-TiITARs.A030 | 0.378 | 0.737 | 0.513 |
| contig022375-TiITARs.A048 | contig022320-TiITARs.A059 | 0.139 | 0.271 | 0.513 |
| contig060292-NyeTARs.A027 | contig022324-TiITARs.A027 | 0.423 | 0.825 | 0.513 |
| contig084886-BriTARs.A017 | contig066890-ZebTARs.A014 | 0.275 | 0.536 | 0.513 |
| contig056023-BurTARs.A019 | contig056021-BurTARs.A020 | 0.189 | 0.369 | 0.513 |
| contig082565-BriTARs.A022 | contig061433-BurTARs.A013 | 0.281 | 0.548 | 0.513 |
| contig035376-NyeTARs.A014 | contig030471-ZebTARs.A024 | 0.261 | 0.508 | 0.513 |
| contig042499-NyeTARs.A028 | contig022356-TiITARs.A040 | 0.381 | 0.741 | 0.513 |
| contig046007-NyeTARs.A017 | contig042499-NyeTARs.A028 | 0.378 | 0.736 | 0.513 |
| contig060105-NyeTARs.A018 | contig022390-TiITARs.A055 | 0.425 | 0.828 | 0.513 |
| contig042499-NyeTARs.A028 | contig030471-ZebTARs.A024 | 0.373 | 0.726 | 0.513 |
| contig022357-TiITARs.A041 | contig030471-ZebTARs.A024 | 0.151 | 0.294 | 0.513 |
| contig061977-BurTARs.A012 | contig045088-TiITARs.A057 | 0.346 | 0.675 | 0.513 |
| contig057301-BurTARs.A017 | contig046013-NyeTARs.A021 | 0.363 | 0.706 | 0.513 |
| contig035377-NyeTARs.A023 | contig042499-NyeTARs.A028 | 0.375 | 0.730 | 0.514 |
| contig056023-BurTARs.A019 | contig007520-TiITARs.A025 | 0.403 | 0.785 | 0.514 |
| contig041024-BurTARs.A026 | contig046011-NyeTARs.A016 | 0.221 | 0.430 | 0.514 |
| contig056200-NyeTARs.A029 | contig022365-TiITARs.A045 | 0.301 | 0.585 | 0.514 |
| contig086351-BriTARs.A021 | contig022363-TiITARs.A043 | 0.452 | 0.879 | 0.514 |
| contig084886-BriTARs.A017 | contig022363-TiITARs.A044 | 0.192 | 0.374 | 0.515 |
| contig022334-TiITARs.A029 | contig062676-ZebTARs.A019 | 0.260 | 0.506 | 0.515 |
| contig029633-BriTAR.A003  | contig045302-BurTAR.A001  | 0.075 | 0.145 | 0.515 |
| contig056023-BurTARs.A019 | contig058002-NyeTARs.A025 | 0.398 | 0.773 | 0.515 |
| contig035381-NyeTARs.A015 | contig022382-TiITARs.A053 | 0.151 | 0.293 | 0.515 |
| contig084876-BriTARs.A015 | contig066890-ZebTARs.A014 | 0.170 | 0.330 | 0.515 |
| contig062676-ZebTARs.A019 | contig061417-ZebTARs.A020 | 0.262 | 0.508 | 0.515 |
| contig034854-BurTARs.A027 | contig061417-ZebTARs.A020 | 0.270 | 0.524 | 0.515 |
| contig060292-NyeTARs.A027 | contig022353-TiITARs.A036 | 0.432 | 0.838 | 0.515 |
| contig061091-BurTARs.A014 | contig022334-TiITARs.A030 | 0.187 | 0.363 | 0.516 |
| contig060292-NyeTARs.A027 | contig022363-TiITARs.A043 | 0.495 | 0.960 | 0.516 |
| contig046007-NyeTARs.A017 | contig022390-TiITARs.A056 | 0.283 | 0.548 | 0.516 |
| contig007524-TiITARs.A026 | contig066285-ZebTARs.A016 | 0.391 | 0.759 | 0.516 |
| contig060292-NyeTARs.A027 | contig022354-TiITARs.A037 | 0.395 | 0.766 | 0.516 |
| contig049534-BurTARs.A025 | contig045999-NyeTARs.A026 | 0.189 | 0.367 | 0.516 |
| contig066691-ZebTARs.A015 | contig062676-ZebTARs.A019 | 0.291 | 0.565 | 0.516 |
| contig084880-BriTARs.A016 | contig022337-TiITARs.A031 | 0.201 | 0.390 | 0.516 |
| contig060707-BurTARs.A015 | contig056023-BurTARs.A019 | 0.389 | 0.754 | 0.516 |
| contig057305-BurTARs.A031 | contig035376-NyeTARs.A014 | 0.363 | 0.703 | 0.516 |
| contig045999-NyeTARs.A026 | contig022379-TiITARs.A052 | 0.271 | 0.525 | 0.516 |
| contig082565-BriTARs.A022 | contig022353-TiITARs.A036 | 0.292 | 0.566 | 0.516 |
| contig046007-NyeTARs.A017 | contig045088-TiITARs.A057 | 0.383 | 0.742 | 0.516 |
| contig059673-BurTARs.A016 | contig066691-ZebTARs.A015 | 0.379 | 0.735 | 0.516 |
| contig022368-TiITARs.A047 | contig030445-ZebTARs.A026 | 0.275 | 0.532 | 0.516 |
| contig060292-NyeTARs.A027 | contig022349-TiITARs.A035 | 0.414 | 0.802 | 0.516 |

|                           |                           |       |       |       |
|---------------------------|---------------------------|-------|-------|-------|
| contig022349-TiITARs.A035 | contig022363-TiITARs.A044 | 0.185 | 0.359 | 0.516 |
| contig046011-NyeTARs.A016 | contig060292-NyeTARs.A027 | 0.452 | 0.875 | 0.516 |
| contig056020-BurTARs.A021 | contig022337-TiITARs.A031 | 0.132 | 0.256 | 0.517 |
| contig045088-TiITARs.A057 | contig066890-ZebTARs.A014 | 0.380 | 0.735 | 0.517 |
| contig061433-BurTARs.A013 | contig007524-TiITARs.A026 | 0.393 | 0.760 | 0.517 |
| contig022354-TiITARs.A038 | contig022363-TiITARs.A043 | 0.182 | 0.353 | 0.517 |
| contig022382-TiITARs.A053 | contig030471-ZebTARs.A024 | 0.281 | 0.544 | 0.517 |
| contig059673-BurTARs.A016 | contig022378-TiITARs.A051 | 0.355 | 0.688 | 0.517 |
| contig034854-BurTARs.A027 | contig022343-TiITARs.A033 | 0.273 | 0.528 | 0.517 |
| contig057301-BurTARs.A017 | contig022375-TiITARs.A048 | 0.382 | 0.740 | 0.517 |
| contig046014-NyeTARs.A024 | contig022382-TiITARs.A053 | 0.264 | 0.510 | 0.517 |
| contig022334-TiITARs.A030 | contig022356-TiITARs.A040 | 0.187 | 0.362 | 0.517 |
| contig084880-BriTARs.A016 | contig022324-TiITARs.A027 | 0.111 | 0.214 | 0.517 |
| contig057305-BurTARs.A031 | contig035375-NyeTARs.A013 | 0.359 | 0.695 | 0.517 |
| contig061091-BurTARs.A014 | contig035376-NyeTARs.A014 | 0.273 | 0.528 | 0.517 |
| contig084880-BriTARs.A016 | contig061433-BurTARs.A013 | 0.107 | 0.207 | 0.517 |
| contig022357-TiITARs.A041 | contig030445-ZebTARs.A026 | 0.275 | 0.532 | 0.517 |
| contig045999-NyeTARs.A026 | contig007520-TiITARs.A025 | 0.401 | 0.775 | 0.518 |
| contig045088-TiITARs.A057 | contig030471-ZebTARs.A024 | 0.369 | 0.712 | 0.518 |
| contig057301-BurTARs.A017 | contig022357-TiITARs.A041 | 0.390 | 0.752 | 0.518 |
| contig042499-NyeTARs.A028 | contig022324-TiITARs.A027 | 0.397 | 0.766 | 0.518 |
| contig060292-NyeTARs.A027 | contig022357-TiITARs.A041 | 0.419 | 0.809 | 0.518 |
| contig061433-BurTARs.A013 | contig058002-NyeTARs.A025 | 0.396 | 0.765 | 0.518 |
| contig046011-NyeTARs.A016 | contig058002-NyeTARs.A025 | 0.407 | 0.786 | 0.518 |
| contig022334-TiITARs.A030 | contig022353-TiITARs.A036 | 0.204 | 0.394 | 0.518 |
| contig058002-NyeTARs.A025 | contig045999-NyeTARs.A026 | 0.396 | 0.764 | 0.518 |
| contig061091-BurTARs.A014 | contig022349-TiITARs.A035 | 0.151 | 0.291 | 0.518 |
| contig061977-BurTARs.A012 | contig045999-NyeTARs.A026 | 0.278 | 0.537 | 0.518 |
| contig046007-NyeTARs.A017 | contig062676-ZebTARs.A019 | 0.273 | 0.527 | 0.518 |
| contig034854-BurTARs.A027 | contig022363-TiITARs.A044 | 0.250 | 0.483 | 0.519 |
| contig056020-BurTARs.A021 | contig030445-ZebTARs.A026 | 0.256 | 0.494 | 0.519 |
| contig084887-BriTARs.A018 | contig056200-NyeTARs.A029 | 0.287 | 0.554 | 0.519 |
| contig022353-TiITARs.A036 | contig022390-TiITARs.A056 | 0.277 | 0.534 | 0.519 |
| contig062039-NyeTARs.A022 | contig022334-TiITARs.A029 | 0.260 | 0.501 | 0.519 |
| contig022368-TiITARs.A046 | contig066890-ZebTARs.A014 | 0.270 | 0.521 | 0.519 |
| contig049540-BurTARs.A024 | contig035377-NyeTARs.A023 | 0.191 | 0.369 | 0.519 |
| contig022382-TiITARs.A053 | contig030445-ZebTARs.A026 | 0.149 | 0.288 | 0.519 |
| contig059673-BurTARs.A016 | contig034854-BurTARs.A027 | 0.364 | 0.701 | 0.519 |
| contig041024-BurTARs.A026 | contig034854-BurTARs.A027 | 0.261 | 0.504 | 0.519 |
| contig061091-BurTARs.A014 | contig061410-ZebTARs.A021 | 0.266 | 0.512 | 0.519 |
| contig007524-TiITARs.A026 | contig030440-ZebTARs.A029 | 0.347 | 0.669 | 0.519 |
| contig046013-NyeTARs.A021 | contig022337-TiITARs.A031 | 0.122 | 0.235 | 0.519 |
| contig022379-TiITARs.A052 | contig066890-ZebTARs.A014 | 0.165 | 0.318 | 0.519 |
| contig022363-TiITARs.A043 | contig066890-ZebTARs.A014 | 0.302 | 0.582 | 0.519 |
| contig045999-NyeTARs.A026 | contig030471-ZebTARs.A024 | 0.187 | 0.360 | 0.519 |
| contig084868-BriTARs.A014 | contig030445-ZebTARs.A026 | 0.125 | 0.242 | 0.519 |
| contig084887-BriTARs.A018 | contig022363-TiITARs.A043 | 0.177 | 0.340 | 0.519 |
| contig022390-TiITARs.A056 | contig066691-ZebTARs.A015 | 0.287 | 0.553 | 0.519 |
| contig084880-BriTARs.A016 | contig022378-TiITARs.A051 | 0.285 | 0.549 | 0.520 |
| contig084887-BriTARs.A018 | contig022349-TiITARs.A035 | 0.147 | 0.284 | 0.520 |
| contig046007-NyeTARs.A017 | contig045999-NyeTARs.A026 | 0.194 | 0.374 | 0.520 |
| contig084880-BriTARs.A016 | contig022390-TiITARs.A056 | 0.296 | 0.570 | 0.520 |
| contig022354-TiITARs.A037 | contig045088-TiITARs.A057 | 0.355 | 0.684 | 0.520 |

|                           |                           |       |       |       |
|---------------------------|---------------------------|-------|-------|-------|
| contig060292-NyeTARs.A027 | contig022330-TiITARs.A028 | 0.416 | 0.801 | 0.520 |
| contig045999-NyeTARs.A026 | contig022378-TiITARs.A051 | 0.287 | 0.551 | 0.520 |
| contig042499-NyeTARs.A028 | contig022337-TiITARs.A031 | 0.380 | 0.730 | 0.520 |
| contig022343-TiITARs.A033 | contig022368-TiITARs.A046 | 0.151 | 0.291 | 0.520 |
| contig046010-NyeTARs.A019 | contig022363-TiITARs.A044 | 0.190 | 0.365 | 0.520 |
| contig056200-NyeTARs.A029 | contig022354-TiITARs.A037 | 0.259 | 0.497 | 0.520 |
| contig057301-BurTARs.A017 | contig022356-TiITARs.A040 | 0.385 | 0.740 | 0.521 |
| contig056020-BurTARs.A021 | contig022378-TiITARs.A051 | 0.263 | 0.506 | 0.521 |
| contig049540-BurTARs.A024 | contig022353-TiITARs.A036 | 0.302 | 0.580 | 0.521 |
| contig042499-NyeTARs.A028 | contig022383-TiITARs.A054 | 0.368 | 0.707 | 0.521 |
| contig059673-BurTARs.A016 | contig030471-ZebTARs.A024 | 0.375 | 0.721 | 0.521 |
| contig022330-TiITARs.A028 | contig022353-TiITARs.A036 | 0.136 | 0.262 | 0.521 |
| contig034854-BurTARs.A027 | contig022341-TiITARs.A032 | 0.277 | 0.531 | 0.521 |
| contig060292-NyeTARs.A027 | contig022343-TiITARs.A033 | 0.406 | 0.779 | 0.521 |
| contig084887-BriTARs.A018 | contig022390-TiITARs.A056 | 0.280 | 0.538 | 0.521 |
| contig060292-NyeTARs.A027 | contig022375-TiITARs.A048 | 0.403 | 0.773 | 0.521 |
| contig030471-ZebTARs.A024 | contig030445-ZebTARs.A026 | 0.257 | 0.492 | 0.521 |
| contig046013-NyeTARs.A021 | contig056200-NyeTARs.A029 | 0.298 | 0.573 | 0.521 |
| contig022354-TiITARs.A037 | contig022379-TiITARs.A052 | 0.228 | 0.438 | 0.521 |
| contig034854-BurTARs.A027 | contig022363-TiITARs.A043 | 0.317 | 0.609 | 0.521 |
| contig045088-TiITARs.A057 | contig022320-TiITARs.A059 | 0.347 | 0.667 | 0.521 |
| contig035376-NyeTARs.A014 | contig022357-TiITARs.A041 | 0.282 | 0.540 | 0.521 |
| contig022382-TiITARs.A053 | contig066691-ZebTARs.A015 | 0.289 | 0.554 | 0.521 |
| contig057301-BurTARs.A017 | contig061410-ZebTARs.A021 | 0.351 | 0.672 | 0.521 |
| contig022375-TiITARs.A048 | contig030440-ZebTARs.A029 | 0.233 | 0.448 | 0.521 |
| contig007518-TiITARs.A019 | contig061410-ZebTARs.A021 | 0.346 | 0.664 | 0.522 |
| contig045999-NyeTARs.A026 | contig061417-ZebTARs.A020 | 0.195 | 0.374 | 0.522 |
| contig086351-BriTARs.A021 | contig030440-ZebTARs.A029 | 0.376 | 0.720 | 0.522 |
| contig042499-NyeTARs.A028 | contig062676-ZebTARs.A019 | 0.374 | 0.717 | 0.522 |
| contig057305-BurTARs.A031 | contig030471-ZebTARs.A024 | 0.422 | 0.809 | 0.522 |
| contig060292-NyeTARs.A027 | contig030471-ZebTARs.A024 | 0.422 | 0.809 | 0.522 |
| contig062039-NyeTARs.A022 | contig066691-ZebTARs.A015 | 0.286 | 0.548 | 0.522 |
| contig056023-BurTARs.A019 | contig022357-TiITARs.A041 | 0.189 | 0.363 | 0.522 |
| contig057301-BurTARs.A017 | contig022320-TiITARs.A059 | 0.349 | 0.669 | 0.522 |
| contig034854-BurTARs.A027 | contig061410-ZebTARs.A021 | 0.157 | 0.300 | 0.522 |
| contig022354-TiITARs.A037 | contig022390-TiITARs.A056 | 0.254 | 0.486 | 0.522 |
| contig035375-NyeTARs.A013 | contig060292-NyeTARs.A027 | 0.360 | 0.690 | 0.522 |
| contig084880-BriTARs.A016 | contig062677-ZebTARs.A018 | 0.330 | 0.631 | 0.522 |
| contig084868-BriTARs.A014 | contig035376-NyeTARs.A014 | 0.127 | 0.243 | 0.522 |
| contig060105-NyeTARs.A018 | contig045999-NyeTARs.A026 | 0.396 | 0.758 | 0.522 |
| contig045999-NyeTARs.A026 | contig061410-ZebTARs.A021 | 0.277 | 0.529 | 0.522 |
| contig042499-NyeTARs.A028 | contig061410-ZebTARs.A021 | 0.345 | 0.660 | 0.522 |
| contig057305-BurTARs.A031 | contig022353-TiITARs.A036 | 0.432 | 0.826 | 0.523 |
| contig084880-BriTARs.A016 | contig046007-NyeTARs.A017 | 0.199 | 0.381 | 0.523 |
| contig057301-BurTARs.A017 | contig061417-ZebTARs.A020 | 0.365 | 0.698 | 0.523 |
| contig057305-BurTARs.A031 | contig022354-TiITARs.A037 | 0.395 | 0.755 | 0.523 |
| contig035381-NyeTARs.A015 | contig045999-NyeTARs.A026 | 0.301 | 0.575 | 0.523 |
| contig041024-BurTARs.A026 | contig030440-ZebTARs.A029 | 0.258 | 0.494 | 0.523 |
| contig022368-TiITARs.A047 | contig030440-ZebTARs.A029 | 0.300 | 0.573 | 0.523 |
| contig034854-BurTARs.A027 | contig057305-BurTARs.A031 | 0.381 | 0.728 | 0.523 |
| contig084887-BriTARs.A018 | contig045999-NyeTARs.A026 | 0.191 | 0.366 | 0.523 |
| contig057301-BurTARs.A017 | contig046014-NyeTARs.A024 | 0.357 | 0.683 | 0.523 |
| contig046007-NyeTARs.A017 | contig022363-TiITARs.A044 | 0.175 | 0.335 | 0.523 |

|                           |                           |       |       |       |
|---------------------------|---------------------------|-------|-------|-------|
| contig086344-BriTARs.A020 | contig022343-TiITARs.A033 | 0.348 | 0.666 | 0.523 |
| contig056023-BurTARs.A019 | contig007524-TiITARs.A026 | 0.409 | 0.781 | 0.523 |
| contig057145-BurTARs.A018 | contig022357-TiITARs.A041 | 0.154 | 0.295 | 0.523 |
| contig022365-TiITARs.A045 | contig022382-TiITARs.A053 | 0.294 | 0.562 | 0.523 |
| contig056020-BurTARs.A021 | contig035376-NyeTARs.A014 | 0.261 | 0.499 | 0.523 |
| contig086344-BriTARs.A020 | contig046011-NyeTARs.A016 | 0.463 | 0.885 | 0.523 |
| contig034854-BurTARs.A027 | contig022375-TiITARs.A048 | 0.232 | 0.444 | 0.523 |
| contig061091-BurTARs.A014 | contig062676-ZebTARs.A019 | 0.287 | 0.549 | 0.524 |
| contig057305-BurTARs.A031 | contig022349-TiITARs.A035 | 0.414 | 0.791 | 0.524 |
| contig035376-NyeTARs.A014 | contig062677-ZebTARs.A018 | 0.164 | 0.313 | 0.524 |
| contig022354-TiITARs.A037 | contig022390-TiITARs.A055 | 0.263 | 0.501 | 0.524 |
| contig035377-NyeTARs.A023 | contig056200-NyeTARs.A029 | 0.193 | 0.369 | 0.524 |
| contig057301-BurTARs.A017 | contig035377-NyeTARs.A023 | 0.385 | 0.734 | 0.524 |
| contig056023-BurTARs.A019 | contig022378-TiITARs.A051 | 0.282 | 0.538 | 0.524 |
| contig045302-BurTAR.A001  | contig040586-ZebTAR.A002  | 0.067 | 0.127 | 0.524 |
| contig056021-BurTARs.A020 | contig066890-ZebTARs.A014 | 0.270 | 0.516 | 0.524 |
| contig057305-BurTARs.A031 | contig046011-NyeTARs.A016 | 0.452 | 0.862 | 0.524 |
| contig046011-NyeTARs.A016 | contig030445-ZebTARs.A026 | 0.285 | 0.543 | 0.524 |
| contig056023-BurTARs.A019 | contig062677-ZebTARs.A018 | 0.323 | 0.616 | 0.524 |
| contig034854-BurTARs.A027 | contig022355-TiITARs.A039 | 0.274 | 0.523 | 0.524 |
| contig057148-BurTARs.A028 | contig030464-ZebTARs.A025 | 0.010 | 0.019 | 0.524 |
| contig084880-BriTARs.A016 | contig022343-TiITARs.A033 | 0.192 | 0.366 | 0.525 |
| contig035375-NyeTARs.A013 | contig022357-TiITARs.A041 | 0.292 | 0.557 | 0.525 |
| contig057301-BurTARs.A017 | contig062676-ZebTARs.A019 | 0.373 | 0.711 | 0.525 |
| contig042499-NyeTARs.A028 | contig022354-TiITARs.A037 | 0.356 | 0.678 | 0.525 |
| contig086344-BriTARs.A020 | contig060707-BurTARs.A015 | 0.014 | 0.027 | 0.525 |
| contig046013-NyeTARs.A021 | contig022363-TiITARs.A044 | 0.176 | 0.335 | 0.525 |
| contig035376-NyeTARs.A014 | contig022353-TiITARs.A036 | 0.286 | 0.544 | 0.525 |
| contig057305-BurTARs.A031 | contig022357-TiITARs.A041 | 0.419 | 0.798 | 0.525 |
| contig022334-TiITARs.A030 | contig022368-TiITARs.A047 | 0.196 | 0.373 | 0.525 |
| contig022330-TiITARs.A028 | contig022337-TiITARs.A031 | 0.129 | 0.245 | 0.525 |
| contig086351-BriTARs.A021 | contig022353-TiITARs.A036 | 0.441 | 0.840 | 0.525 |
| contig022363-TiITARs.A043 | contig062677-ZebTARs.A018 | 0.322 | 0.612 | 0.525 |
| contig086351-BriTARs.A021 | contig022343-TiITARs.A033 | 0.416 | 0.790 | 0.526 |
| contig022343-TiITARs.A033 | contig066890-ZebTARs.A014 | 0.282 | 0.537 | 0.526 |
| contig084868-BriTARs.A014 | contig056020-BurTARs.A021 | 0.314 | 0.597 | 0.526 |
| contig041024-BurTARs.A026 | contig057305-BurTARs.A031 | 0.405 | 0.770 | 0.526 |
| contig041024-BurTARs.A026 | contig060292-NyeTARs.A027 | 0.405 | 0.770 | 0.526 |
| contig046011-NyeTARs.A016 | contig066056-ZebTARs.A017 | 0.436 | 0.829 | 0.526 |
| contig084887-BriTARs.A018 | contig062039-NyeTARs.A022 | 0.281 | 0.535 | 0.526 |
| contig056020-BurTARs.A021 | contig022379-TiITARs.A052 | 0.251 | 0.477 | 0.526 |
| contig057301-BurTARs.A017 | contig022324-TiITARs.A027 | 0.397 | 0.754 | 0.526 |
| contig084880-BriTARs.A016 | contig022379-TiITARs.A052 | 0.267 | 0.508 | 0.526 |
| contig082565-BriTARs.A022 | contig046007-NyeTARs.A017 | 0.273 | 0.518 | 0.526 |
| contig059673-BurTARs.A016 | contig022375-TiITARs.A048 | 0.356 | 0.677 | 0.526 |
| contig057305-BurTARs.A031 | contig022375-TiITARs.A048 | 0.402 | 0.764 | 0.526 |
| contig057301-BurTARs.A017 | contig046007-NyeTARs.A017 | 0.392 | 0.745 | 0.526 |
| contig035376-NyeTARs.A014 | contig060292-NyeTARs.A027 | 0.365 | 0.694 | 0.527 |
| contig084887-BriTARs.A018 | contig062676-ZebTARs.A019 | 0.291 | 0.552 | 0.527 |
| contig022356-TiITARs.A040 | contig022357-TiITARs.A041 | 0.147 | 0.279 | 0.527 |
| contig045999-NyeTARs.A026 | contig007524-TiITARs.A026 | 0.406 | 0.771 | 0.527 |
| contig046013-NyeTARs.A021 | contig022383-TiITARs.A054 | 0.299 | 0.567 | 0.527 |
| contig022349-TiITARs.A035 | contig022378-TiITARs.A051 | 0.274 | 0.519 | 0.527 |



|                           |                           |       |       |       |
|---------------------------|---------------------------|-------|-------|-------|
| contig066890-ZebTARs.A014 | contig061417-ZebTARs.A020 | 0.271 | 0.514 | 0.527 |
| contig022343-TiITARs.A033 | contig022390-TiITARs.A056 | 0.277 | 0.526 | 0.527 |
| contig057305-BurTARs.A031 | contig022330-TiITARs.A028 | 0.416 | 0.790 | 0.527 |
| contig042499-NyeTARs.A028 | contig066890-ZebTARs.A014 | 0.375 | 0.710 | 0.527 |
| contig022353-TiITARs.A036 | contig022363-TiITARs.A043 | 0.156 | 0.297 | 0.527 |
| contig035375-NyeTARs.A013 | contig022375-TiITARs.A048 | 0.242 | 0.459 | 0.527 |
| contig061091-BurTARs.A014 | contig022390-TiITARs.A056 | 0.283 | 0.537 | 0.528 |
| contig084880-BriTARs.A016 | contig022363-TiITARs.A043 | 0.239 | 0.453 | 0.528 |
| contig022390-TiITARs.A056 | contig030471-ZebTARs.A024 | 0.287 | 0.544 | 0.528 |
| contig034854-BurTARs.A027 | contig060292-NyeTARs.A027 | 0.382 | 0.723 | 0.528 |
| contig057305-BurTARs.A031 | contig022343-TiITARs.A033 | 0.406 | 0.769 | 0.528 |
| contig057301-BurTARs.A017 | contig022334-TiITARs.A030 | 0.383 | 0.725 | 0.528 |
| contig035375-NyeTARs.A013 | contig062677-ZebTARs.A018 | 0.169 | 0.321 | 0.528 |
| contig022375-TiITARs.A048 | contig062677-ZebTARs.A018 | 0.243 | 0.460 | 0.528 |
| contig042499-NyeTARs.A028 | contig022320-TiITARs.A059 | 0.349 | 0.661 | 0.528 |
| contig084880-BriTARs.A016 | contig061977-BurTARs.A012 | 0.275 | 0.520 | 0.528 |
| contig022378-TiITARs.A051 | contig022379-TiITARs.A052 | 0.206 | 0.390 | 0.529 |
| contig084887-BriTARs.A018 | contig061977-BurTARs.A012 | 0.264 | 0.500 | 0.529 |
| contig022378-TiITARs.A051 | contig022320-TiITARs.A059 | 0.248 | 0.468 | 0.529 |
| contig045999-NyeTARs.A026 | contig022330-TiITARs.A028 | 0.189 | 0.358 | 0.529 |
| contig022343-TiITARs.A033 | contig022363-TiITARs.A043 | 0.190 | 0.359 | 0.529 |
| contig046011-NyeTARs.A016 | contig060105-NyeTARs.A018 | 0.454 | 0.859 | 0.529 |
| contig022368-TiITARs.A046 | contig022390-TiITARs.A056 | 0.264 | 0.499 | 0.529 |
| contig061977-BurTARs.A012 | contig022390-TiITARs.A056 | 0.154 | 0.290 | 0.529 |
| contig022349-TiITARs.A035 | contig066691-ZebTARs.A015 | 0.154 | 0.291 | 0.529 |
| contig084887-BriTARs.A018 | contig046013-NyeTARs.A021 | 0.022 | 0.042 | 0.529 |
| contig061091-BurTARs.A014 | contig022382-TiITARs.A053 | 0.285 | 0.538 | 0.529 |
| contig084880-BriTARs.A016 | contig057305-BurTARs.A031 | 0.443 | 0.837 | 0.530 |
| contig022337-TiITARs.A031 | contig045088-TiITARs.A057 | 0.383 | 0.722 | 0.530 |
| contig022362-TiITARs.A042 | contig022368-TiITARs.A047 | 0.113 | 0.213 | 0.530 |
| contig084880-BriTARs.A016 | contig049540-BurTARs.A024 | 0.328 | 0.620 | 0.530 |
| contig056023-BurTARs.A019 | contig060105-NyeTARs.A018 | 0.396 | 0.747 | 0.530 |
| contig086351-BriTARs.A021 | contig022375-TiITARs.A048 | 0.407 | 0.767 | 0.530 |
| contig022337-TiITARs.A031 | contig022363-TiITARs.A043 | 0.201 | 0.379 | 0.530 |
| contig057301-BurTARs.A017 | contig066890-ZebTARs.A014 | 0.378 | 0.714 | 0.530 |
| contig084868-BriTARs.A014 | contig062676-ZebTARs.A019 | 0.038 | 0.071 | 0.530 |
| contig084876-BriTARs.A015 | contig046007-NyeTARs.A017 | 0.283 | 0.533 | 0.530 |
| contig022334-TiITARs.A029 | contig022390-TiITARs.A056 | 0.265 | 0.500 | 0.530 |
| contig060105-NyeTARs.A018 | contig022363-TiITARs.A043 | 0.417 | 0.786 | 0.530 |
| contig022337-TiITARs.A031 | contig022355-TiITARs.A039 | 0.126 | 0.238 | 0.530 |
| contig049540-BurTARs.A024 | contig022363-TiITARs.A043 | 0.326 | 0.614 | 0.531 |
| contig066890-ZebTARs.A014 | contig030471-ZebTARs.A024 | 0.292 | 0.550 | 0.531 |
| contig045088-TiITARs.A057 | contig061410-ZebTARs.A021 | 0.353 | 0.664 | 0.531 |
| contig084880-BriTARs.A016 | contig066890-ZebTARs.A014 | 0.303 | 0.570 | 0.531 |
| contig034854-BurTARs.A027 | contig022377-TiITARs.A050 | 0.277 | 0.522 | 0.531 |
| contig056023-BurTARs.A019 | contig022356-TiITARs.A040 | 0.193 | 0.363 | 0.531 |
| contig022363-TiITARs.A043 | contig022379-TiITARs.A052 | 0.272 | 0.512 | 0.531 |
| contig086351-BriTARs.A021 | contig035376-NyeTARs.A014 | 0.376 | 0.708 | 0.531 |
| contig022330-TiITARs.A028 | contig022378-TiITARs.A051 | 0.247 | 0.465 | 0.531 |
| contig045999-NyeTARs.A026 | contig022337-TiITARs.A031 | 0.203 | 0.382 | 0.532 |
| contig056023-BurTARs.A019 | contig049534-BurTARs.A025 | 0.190 | 0.358 | 0.532 |
| contig060707-BurTARs.A015 | contig022363-TiITARs.A043 | 0.414 | 0.779 | 0.532 |
| contig056200-NyeTARs.A029 | contig022353-TiITARs.A036 | 0.304 | 0.572 | 0.532 |

|                           |                           |       |       |       |
|---------------------------|---------------------------|-------|-------|-------|
| contig056023-BurTARs.A019 | contig049540-BurTARs.A024 | 0.321 | 0.605 | 0.532 |
| contig022330-TiITARs.A028 | contig022363-TiITARs.A044 | 0.181 | 0.341 | 0.532 |
| contig042499-NyeTARs.A028 | contig022353-TiITARs.A036 | 0.385 | 0.723 | 0.532 |
| contig035381-NyeTARs.A015 | contig046013-NyeTARs.A021 | 0.285 | 0.535 | 0.532 |
| contig060292-NyeTARs.A027 | contig022356-TiITARs.A040 | 0.432 | 0.811 | 0.532 |
| contig082565-BriTARs.A022 | contig022382-TiITARs.A053 | 0.152 | 0.285 | 0.532 |
| contig022368-TiITARs.A046 | contig022378-TiITARs.A051 | 0.253 | 0.475 | 0.532 |
| contig084880-BriTARs.A016 | contig061410-ZebTARs.A021 | 0.273 | 0.513 | 0.533 |
| contig030471-ZebTARs.A024 | contig030440-ZebTARs.A029 | 0.280 | 0.526 | 0.533 |
| contig084868-BriTARs.A014 | contig084887-BriTARs.A018 | 0.339 | 0.636 | 0.533 |
| contig057301-BurTARs.A017 | contig030471-ZebTARs.A024 | 0.370 | 0.695 | 0.533 |
| contig046011-NyeTARs.A016 | contig030471-ZebTARs.A024 | 0.246 | 0.462 | 0.533 |
| contig046011-NyeTARs.A016 | contig007524-TiITARs.A026 | 0.413 | 0.775 | 0.533 |
| contig022354-TiITARs.A038 | contig022363-TiITARs.A044 | 0.180 | 0.337 | 0.533 |
| contig084880-BriTARs.A016 | contig056020-BurTARs.A021 | 0.216 | 0.405 | 0.533 |
| contig084880-BriTARs.A016 | contig066691-ZebTARs.A015 | 0.199 | 0.374 | 0.533 |
| contig086351-BriTARs.A021 | contig041024-BurTARs.A026 | 0.412 | 0.772 | 0.533 |
| contig084886-BriTARs.A017 | contig022354-TiITARs.A037 | 0.199 | 0.373 | 0.533 |
| contig057301-BurTARs.A017 | contig056020-BurTARs.A021 | 0.416 | 0.780 | 0.533 |
| contig022334-TiITARs.A030 | contig022337-TiITARs.A031 | 0.193 | 0.362 | 0.533 |
| contig057305-BurTARs.A031 | contig035377-NyeTARs.A023 | 0.367 | 0.687 | 0.534 |
| contig082565-BriTARs.A022 | contig046013-NyeTARs.A021 | 0.280 | 0.524 | 0.534 |
| contig022343-TiITARs.A033 | contig022363-TiITARs.A044 | 0.193 | 0.361 | 0.534 |
| contig022363-TiITARs.A043 | contig030440-ZebTARs.A029 | 0.310 | 0.580 | 0.534 |
| contig022378-TiITARs.A051 | contig022390-TiITARs.A056 | 0.237 | 0.443 | 0.534 |
| contig086351-BriTARs.A021 | contig034854-BurTARs.A027 | 0.392 | 0.733 | 0.534 |
| contig046007-NyeTARs.A017 | contig022379-TiITARs.A052 | 0.265 | 0.496 | 0.534 |
| contig084876-BriTARs.A015 | contig042499-NyeTARs.A028 | 0.354 | 0.662 | 0.535 |
| contig035375-NyeTARs.A013 | contig022365-TiITARs.A045 | 0.299 | 0.560 | 0.535 |
| contig022383-TiITARs.A054 | contig030440-ZebTARs.A029 | 0.135 | 0.252 | 0.535 |
| contig082565-BriTARs.A022 | contig062676-ZebTARs.A019 | 0.106 | 0.199 | 0.535 |
| contig057301-BurTARs.A017 | contig022337-TiITARs.A031 | 0.385 | 0.719 | 0.535 |
| contig046007-NyeTARs.A017 | contig030440-ZebTARs.A029 | 0.282 | 0.527 | 0.535 |
| contig049534-BurTARs.A025 | contig022349-TiITARs.A035 | 0.192 | 0.359 | 0.535 |
| contig022363-TiITARs.A044 | contig030464-ZebTARs.A025 | 0.196 | 0.366 | 0.535 |
| contig084876-BriTARs.A015 | contig066691-ZebTARs.A015 | 0.284 | 0.530 | 0.535 |
| contig035376-NyeTARs.A014 | contig022368-TiITARs.A046 | 0.260 | 0.485 | 0.535 |
| contig035375-NyeTARs.A013 | contig022363-TiITARs.A044 | 0.261 | 0.488 | 0.535 |
| contig046007-NyeTARs.A017 | contig030445-ZebTARs.A026 | 0.264 | 0.493 | 0.536 |
| contig061433-BurTARs.A013 | contig022382-TiITARs.A053 | 0.302 | 0.564 | 0.536 |
| contig084880-BriTARs.A016 | contig046013-NyeTARs.A021 | 0.202 | 0.376 | 0.536 |
| contig035375-NyeTARs.A013 | contig007524-TiITARs.A026 | 0.348 | 0.649 | 0.536 |
| contig084876-BriTARs.A015 | contig022363-TiITARs.A043 | 0.293 | 0.548 | 0.536 |
| contig022357-TiITARs.A041 | contig062676-ZebTARs.A019 | 0.277 | 0.517 | 0.536 |
| contig062039-NyeTARs.A022 | contig022362-TiITARs.A042 | 0.279 | 0.521 | 0.536 |
| contig022354-TiITARs.A037 | contig022382-TiITARs.A053 | 0.248 | 0.463 | 0.536 |
| contig059673-BurTARs.A016 | contig035375-NyeTARs.A013 | 0.356 | 0.665 | 0.536 |
| contig046013-NyeTARs.A021 | contig066890-ZebTARs.A014 | 0.287 | 0.536 | 0.536 |
| contig060292-NyeTARs.A027 | contig022334-TiITARs.A029 | 0.415 | 0.774 | 0.536 |
| contig034854-BurTARs.A027 | contig045088-TiITARs.A057 | 0.392 | 0.730 | 0.537 |
| contig084876-BriTARs.A015 | contig022353-TiITARs.A036 | 0.290 | 0.541 | 0.537 |
| contig022383-TiITARs.A054 | contig066890-ZebTARs.A014 | 0.108 | 0.201 | 0.537 |
| contig056020-BurTARs.A021 | contig022357-TiITARs.A041 | 0.157 | 0.293 | 0.537 |

|                           |                           |       |       |       |
|---------------------------|---------------------------|-------|-------|-------|
| contig084880-BriTARs.A016 | contig060292-NyeTARs.A027 | 0.443 | 0.825 | 0.537 |
| contig057301-BurTARs.A017 | contig030440-ZebTARs.A029 | 0.383 | 0.714 | 0.537 |
| contig056023-BurTARs.A019 | contig022379-TiITARs.A052 | 0.272 | 0.506 | 0.537 |
| contig022349-TiITARs.A035 | contig045088-TiITARs.A057 | 0.380 | 0.708 | 0.537 |
| contig049540-BurTARs.A024 | contig035376-NyeTARs.A014 | 0.162 | 0.302 | 0.537 |
| contig045999-NyeTARs.A026 | contig022390-TiITARs.A056 | 0.299 | 0.558 | 0.537 |
| contig061977-BurTARs.A012 | contig046013-NyeTARs.A021 | 0.270 | 0.502 | 0.537 |
| contig035375-NyeTARs.A013 | contig022383-TiITARs.A054 | 0.137 | 0.256 | 0.537 |
| contig056023-BurTARs.A019 | contig035381-NyeTARs.A015 | 0.298 | 0.554 | 0.537 |
| contig086351-BriTARs.A021 | contig035377-NyeTARs.A023 | 0.382 | 0.710 | 0.538 |
| contig057305-BurTARs.A031 | contig022356-TiITARs.A040 | 0.431 | 0.801 | 0.538 |
| contig056023-BurTARs.A019 | contig022330-TiITARs.A028 | 0.189 | 0.352 | 0.538 |
| contig086351-BriTARs.A021 | contig022357-TiITARs.A041 | 0.424 | 0.788 | 0.538 |
| contig084876-BriTARs.A015 | contig045999-NyeTARs.A026 | 0.291 | 0.540 | 0.538 |
| contig022334-TiITARs.A029 | contig022363-TiITARs.A044 | 0.178 | 0.330 | 0.538 |
| contig084876-BriTARs.A015 | contig034854-BurTARs.A027 | 0.167 | 0.310 | 0.538 |
| contig066691-ZebTARs.A015 | contig030440-ZebTARs.A029 | 0.287 | 0.533 | 0.538 |
| contig035375-NyeTARs.A013 | contig022355-TiITARs.A039 | 0.276 | 0.512 | 0.539 |
| contig045999-NyeTARs.A026 | contig022362-TiITARs.A042 | 0.209 | 0.388 | 0.539 |
| contig084868-BriTARs.A014 | contig046011-NyeTARs.A016 | 0.341 | 0.633 | 0.539 |
| contig060292-NyeTARs.A027 | contig022337-TiITARs.A031 | 0.417 | 0.773 | 0.539 |
| contig061977-BurTARs.A012 | contig056023-BurTARs.A019 | 0.279 | 0.518 | 0.539 |
| contig059673-BurTARs.A016 | contig046011-NyeTARs.A016 | 0.458 | 0.850 | 0.539 |
| contig056200-NyeTARs.A029 | contig022363-TiITARs.A043 | 0.328 | 0.608 | 0.539 |
| contig046007-NyeTARs.A017 | contig066890-ZebTARs.A014 | 0.294 | 0.545 | 0.539 |
| contig045999-NyeTARs.A026 | contig066691-ZebTARs.A015 | 0.198 | 0.366 | 0.539 |
| contig046011-NyeTARs.A016 | contig042499-NyeTARs.A028 | 0.420 | 0.779 | 0.539 |
| contig056021-BurTARs.A020 | contig060292-NyeTARs.A027 | 0.414 | 0.768 | 0.539 |
| contig056023-BurTARs.A019 | contig030471-ZebTARs.A024 | 0.186 | 0.345 | 0.539 |
| contig086351-BriTARs.A021 | contig022356-TiITARs.A040 | 0.439 | 0.813 | 0.539 |
| contig086351-BriTARs.A021 | contig062677-ZebTARs.A018 | 0.378 | 0.701 | 0.540 |
| contig022320-TiITARs.A059 | contig030440-ZebTARs.A029 | 0.261 | 0.484 | 0.540 |
| contig034854-BurTARs.A027 | contig022320-TiITARs.A059 | 0.272 | 0.504 | 0.540 |
| contig057145-BurTARs.A018 | contig060292-NyeTARs.A027 | 0.428 | 0.793 | 0.540 |
| contig046011-NyeTARs.A016 | contig007518-TiITARs.A019 | 0.441 | 0.817 | 0.540 |
| contig084880-BriTARs.A016 | contig056200-NyeTARs.A029 | 0.331 | 0.611 | 0.541 |
| contig034854-BurTARs.A027 | contig046014-NyeTARs.A024 | 0.268 | 0.495 | 0.541 |
| contig035375-NyeTARs.A013 | contig022368-TiITARs.A047 | 0.309 | 0.571 | 0.541 |
| contig045999-NyeTARs.A026 | contig022343-TiITARs.A033 | 0.194 | 0.359 | 0.541 |
| contig022353-TiITARs.A036 | contig022362-TiITARs.A042 | 0.152 | 0.282 | 0.541 |
| contig084868-BriTARs.A014 | contig022353-TiITARs.A036 | 0.323 | 0.596 | 0.541 |
| contig056021-BurTARs.A020 | contig022390-TiITARs.A056 | 0.265 | 0.491 | 0.541 |
| contig086351-BriTARs.A021 | contig022354-TiITARs.A037 | 0.404 | 0.747 | 0.541 |
| contig045088-TiITARs.A057 | contig030440-ZebTARs.A029 | 0.387 | 0.716 | 0.541 |
| contig022349-TiITARs.A035 | contig022368-TiITARs.A046 | 0.159 | 0.294 | 0.541 |
| contig084887-BriTARs.A018 | contig061410-ZebTARs.A021 | 0.267 | 0.493 | 0.541 |
| contig061977-BurTARs.A012 | contig046011-NyeTARs.A016 | 0.302 | 0.557 | 0.541 |
| contig022379-TiITARs.A052 | contig066691-ZebTARs.A015 | 0.272 | 0.502 | 0.541 |
| contig022349-TiITARs.A035 | contig022377-TiITARs.A050 | 0.174 | 0.321 | 0.541 |
| contig084887-BriTARs.A018 | contig022382-TiITARs.A053 | 0.280 | 0.517 | 0.541 |
| contig022353-TiITARs.A036 | contig030440-ZebTARs.A029 | 0.269 | 0.497 | 0.542 |
| contig049540-BurTARs.A024 | contig035375-NyeTARs.A013 | 0.168 | 0.309 | 0.542 |
| contig046013-NyeTARs.A021 | contig045999-NyeTARs.A026 | 0.200 | 0.369 | 0.542 |

|                           |                           |       |       |       |
|---------------------------|---------------------------|-------|-------|-------|
| contig084880-BriTARs.A016 | contig061091-BurTARs.A014 | 0.196 | 0.361 | 0.542 |
| contig061977-BurTARs.A012 | contig035375-NyeTARs.A013 | 0.142 | 0.263 | 0.542 |
| contig046011-NyeTARs.A016 | contig062676-ZebTARs.A019 | 0.312 | 0.575 | 0.542 |
| contig057301-BurTARs.A017 | contig022354-TiITARs.A037 | 0.360 | 0.663 | 0.542 |
| contig022363-TiITARs.A043 | contig022382-TiITARs.A053 | 0.313 | 0.578 | 0.542 |
| contig034854-BurTARs.A027 | contig035376-NyeTARs.A014 | 0.058 | 0.107 | 0.542 |
| contig082565-BriTARs.A022 | contig046011-NyeTARs.A016 | 0.301 | 0.555 | 0.543 |
| contig084880-BriTARs.A016 | contig030445-ZebTARs.A026 | 0.293 | 0.541 | 0.543 |
| contig056023-BurTARs.A019 | contig046007-NyeTARs.A017 | 0.199 | 0.367 | 0.543 |
| contig056023-BurTARs.A019 | contig056200-NyeTARs.A029 | 0.324 | 0.596 | 0.543 |
| contig034854-BurTARs.A027 | contig022357-TiITARs.A041 | 0.294 | 0.542 | 0.543 |
| contig046014-NyeTARs.A024 | contig030440-ZebTARs.A029 | 0.263 | 0.485 | 0.543 |
| contig035376-NyeTARs.A014 | contig056200-NyeTARs.A029 | 0.164 | 0.302 | 0.543 |
| contig056021-BurTARs.A020 | contig046011-NyeTARs.A016 | 0.243 | 0.448 | 0.543 |
| contig046013-NyeTARs.A021 | contig060292-NyeTARs.A027 | 0.410 | 0.754 | 0.543 |
| contig022368-TiITARs.A046 | contig062677-ZebTARs.A018 | 0.281 | 0.518 | 0.543 |
| contig045999-NyeTARs.A026 | contig022363-TiITARs.A043 | 0.249 | 0.459 | 0.543 |
| contig084876-BriTARs.A015 | contig022378-TiITARs.A051 | 0.219 | 0.403 | 0.543 |
| contig056023-BurTARs.A019 | contig061410-ZebTARs.A021 | 0.278 | 0.511 | 0.543 |
| contig046007-NyeTARs.A017 | contig022357-TiITARs.A041 | 0.161 | 0.296 | 0.543 |
| contig084876-BriTARs.A015 | contig061091-BurTARs.A014 | 0.280 | 0.515 | 0.544 |
| contig057305-BurTARs.A031 | contig022334-TiITARs.A029 | 0.415 | 0.764 | 0.544 |
| contig045999-NyeTARs.A026 | contig022324-TiITARs.A027 | 0.111 | 0.204 | 0.544 |
| contig022334-TiITARs.A029 | contig061417-ZebTARs.A020 | 0.052 | 0.096 | 0.544 |
| contig034854-BurTARs.A027 | contig062677-ZebTARs.A018 | 0.183 | 0.337 | 0.544 |
| contig022375-TiITARs.A048 | contig022382-TiITARs.A053 | 0.233 | 0.428 | 0.544 |
| contig022334-TiITARs.A029 | contig022378-TiITARs.A051 | 0.254 | 0.467 | 0.544 |
| contig046011-NyeTARs.A016 | contig061410-ZebTARs.A021 | 0.299 | 0.550 | 0.544 |
| contig082565-BriTARs.A022 | contig035375-NyeTARs.A013 | 0.075 | 0.139 | 0.544 |
| contig035377-NyeTARs.A023 | contig060292-NyeTARs.A027 | 0.369 | 0.678 | 0.544 |
| contig086351-BriTARs.A021 | contig066890-ZebTARs.A014 | 0.373 | 0.684 | 0.544 |
| contig056023-BurTARs.A019 | contig061417-ZebTARs.A020 | 0.197 | 0.362 | 0.545 |
| contig049540-BurTARs.A024 | contig022375-TiITARs.A048 | 0.243 | 0.447 | 0.545 |
| contig035375-NyeTARs.A013 | contig030445-ZebTARs.A026 | 0.075 | 0.139 | 0.545 |
| contig086351-BriTARs.A021 | contig022330-TiITARs.A028 | 0.424 | 0.778 | 0.545 |
| contig056023-BurTARs.A019 | contig022390-TiITARs.A056 | 0.297 | 0.545 | 0.545 |
| contig056020-BurTARs.A021 | contig035375-NyeTARs.A013 | 0.283 | 0.519 | 0.545 |
| contig084880-BriTARs.A016 | contig035376-NyeTARs.A014 | 0.298 | 0.547 | 0.545 |
| contig060292-NyeTARs.A027 | contig022377-TiITARs.A050 | 0.425 | 0.780 | 0.545 |
| contig034854-BurTARs.A027 | contig042499-NyeTARs.A028 | 0.386 | 0.707 | 0.545 |
| contig046014-NyeTARs.A024 | contig060292-NyeTARs.A027 | 0.413 | 0.758 | 0.545 |
| contig057305-BurTARs.A031 | contig046014-NyeTARs.A024 | 0.413 | 0.758 | 0.545 |
| contig035375-NyeTARs.A013 | contig022362-TiITARs.A042 | 0.291 | 0.534 | 0.545 |
| contig022337-TiITARs.A031 | contig022363-TiITARs.A044 | 0.190 | 0.348 | 0.545 |
| contig022375-TiITARs.A048 | contig022378-TiITARs.A051 | 0.248 | 0.455 | 0.546 |
| contig056020-BurTARs.A021 | contig034854-BurTARs.A027 | 0.280 | 0.513 | 0.546 |
| contig046011-NyeTARs.A016 | contig022375-TiITARs.A048 | 0.187 | 0.343 | 0.546 |
| contig086351-BriTARs.A021 | contig035375-NyeTARs.A013 | 0.377 | 0.689 | 0.546 |
| contig061091-BurTARs.A014 | contig062039-NyeTARs.A022 | 0.282 | 0.517 | 0.546 |
| contig057305-BurTARs.A031 | contig022337-TiITARs.A031 | 0.417 | 0.763 | 0.546 |
| contig086351-BriTARs.A021 | contig022349-TiITARs.A035 | 0.418 | 0.764 | 0.546 |
| contig046007-NyeTARs.A017 | contig022337-TiITARs.A031 | 0.136 | 0.249 | 0.546 |
| contig084887-BriTARs.A018 | contig056023-BurTARs.A019 | 0.193 | 0.354 | 0.546 |

|                           |                           |       |       |       |
|---------------------------|---------------------------|-------|-------|-------|
| contig042499-NyeTARs.A028 | contig022349-TiITARs.A035 | 0.385 | 0.704 | 0.547 |
| contig045999-NyeTARs.A026 | contig062677-ZebTARs.A018 | 0.330 | 0.604 | 0.547 |
| contig046011-NyeTARs.A016 | contig022365-TiITARs.A045 | 0.250 | 0.458 | 0.547 |
| contig056023-BurTARs.A019 | contig057305-BurTARs.A031 | 0.449 | 0.821 | 0.547 |
| contig086351-BriTARs.A021 | contig049540-BurTARs.A024 | 0.383 | 0.700 | 0.547 |
| contig046013-NyeTARs.A021 | contig007524-TiITARs.A026 | 0.371 | 0.678 | 0.547 |
| contig056021-BurTARs.A020 | contig057305-BurTARs.A031 | 0.414 | 0.757 | 0.547 |
| contig086351-BriTARs.A021 | contig057145-BurTARs.A018 | 0.435 | 0.795 | 0.547 |
| contig057301-BurTARs.A017 | contig022353-TiITARs.A036 | 0.390 | 0.712 | 0.547 |
| contig057145-BurTARs.A018 | contig057305-BurTARs.A031 | 0.428 | 0.782 | 0.547 |
| contig046011-NyeTARs.A016 | contig061417-ZebTARs.A020 | 0.239 | 0.437 | 0.547 |
| contig057305-BurTARs.A031 | contig045999-NyeTARs.A026 | 0.444 | 0.810 | 0.548 |
| contig035375-NyeTARs.A013 | contig056200-NyeTARs.A029 | 0.169 | 0.309 | 0.548 |
| contig034854-BurTARs.A027 | contig022362-TiITARs.A042 | 0.290 | 0.529 | 0.548 |
| contig035376-NyeTARs.A014 | contig046007-NyeTARs.A017 | 0.274 | 0.500 | 0.548 |
| contig057301-BurTARs.A017 | contig022349-TiITARs.A035 | 0.385 | 0.703 | 0.548 |
| contig084876-BriTARs.A015 | contig057301-BurTARs.A017 | 0.360 | 0.657 | 0.548 |
| contig086351-BriTARs.A021 | contig030471-ZebTARs.A024 | 0.427 | 0.778 | 0.548 |
| contig022390-TiITARs.A056 | contig061417-ZebTARs.A020 | 0.268 | 0.489 | 0.548 |
| contig061091-BurTARs.A014 | contig045999-NyeTARs.A026 | 0.194 | 0.354 | 0.548 |
| contig062039-NyeTARs.A022 | contig030471-ZebTARs.A024 | 0.283 | 0.515 | 0.548 |
| contig084876-BriTARs.A015 | contig084880-BriTARs.A016 | 0.287 | 0.524 | 0.549 |
| contig061091-BurTARs.A014 | contig022363-TiITARs.A043 | 0.171 | 0.312 | 0.549 |
| contig046011-NyeTARs.A016 | contig022324-TiITARs.A027 | 0.280 | 0.509 | 0.550 |
| contig061091-BurTARs.A014 | contig022379-TiITARs.A052 | 0.268 | 0.487 | 0.550 |
| contig046013-NyeTARs.A021 | contig061410-ZebTARs.A021 | 0.272 | 0.495 | 0.550 |
| contig084887-BriTARs.A018 | contig022378-TiITARs.A051 | 0.270 | 0.492 | 0.550 |
| contig022390-TiITARs.A056 | contig045088-TiITARs.A057 | 0.383 | 0.697 | 0.550 |
| contig034854-BurTARs.A027 | contig030445-ZebTARs.A026 | 0.062 | 0.112 | 0.550 |
| contig046011-NyeTARs.A016 | contig022354-TiITARs.A038 | 0.243 | 0.442 | 0.550 |
| contig084880-BriTARs.A016 | contig086351-BriTARs.A021 | 0.450 | 0.818 | 0.550 |
| contig056023-BurTARs.A019 | contig022363-TiITARs.A043 | 0.252 | 0.458 | 0.550 |
| contig057305-BurTARs.A031 | contig046013-NyeTARs.A021 | 0.410 | 0.744 | 0.551 |
| contig046011-NyeTARs.A016 | contig066285-ZebTARs.A016 | 0.288 | 0.523 | 0.551 |
| contig046014-NyeTARs.A024 | contig022378-TiITARs.A051 | 0.256 | 0.465 | 0.551 |
| contig056200-NyeTARs.A029 | contig022375-TiITARs.A048 | 0.244 | 0.443 | 0.551 |
| contig046013-NyeTARs.A021 | contig022349-TiITARs.A035 | 0.159 | 0.289 | 0.551 |
| contig034854-BurTARs.A027 | contig046011-NyeTARs.A016 | 0.308 | 0.559 | 0.551 |
| contig057305-BurTARs.A031 | contig066890-ZebTARs.A014 | 0.360 | 0.653 | 0.551 |
| contig086351-BriTARs.A021 | contig022337-TiITARs.A031 | 0.427 | 0.774 | 0.551 |
| contig035377-NyeTARs.A023 | contig022382-TiITARs.A053 | 0.183 | 0.332 | 0.551 |
| contig060707-BurTARs.A015 | contig046011-NyeTARs.A016 | 0.453 | 0.821 | 0.551 |
| contig057301-BurTARs.A017 | contig034854-BurTARs.A027 | 0.393 | 0.712 | 0.551 |
| contig046013-NyeTARs.A021 | contig062676-ZebTARs.A019 | 0.296 | 0.537 | 0.552 |
| contig046011-NyeTARs.A016 | contig045999-NyeTARs.A026 | 0.305 | 0.553 | 0.552 |
| contig022355-TiITARs.A039 | contig022378-TiITARs.A051 | 0.258 | 0.467 | 0.552 |
| contig046013-NyeTARs.A021 | contig022363-TiITARs.A043 | 0.179 | 0.323 | 0.552 |
| contig022349-TiITARs.A035 | contig022363-TiITARs.A043 | 0.182 | 0.330 | 0.553 |
| contig042499-NyeTARs.A028 | contig030440-ZebTARs.A029 | 0.382 | 0.691 | 0.553 |
| contig045999-NyeTARs.A026 | contig022334-TiITARs.A029 | 0.191 | 0.346 | 0.553 |
| contig057305-BurTARs.A031 | contig022377-TiITARs.A050 | 0.425 | 0.770 | 0.553 |
| contig086351-BriTARs.A021 | contig046014-NyeTARs.A024 | 0.420 | 0.760 | 0.553 |
| contig056023-BurTARs.A019 | contig056020-BurTARs.A021 | 0.216 | 0.391 | 0.553 |

|                           |                           |       |       |       |
|---------------------------|---------------------------|-------|-------|-------|
| contig082565-BriTARs.A022 | contig056020-BurTARs.A021 | 0.295 | 0.534 | 0.553 |
| contig022349-TiITARs.A035 | contig022353-TiITARs.A036 | 0.175 | 0.316 | 0.553 |
| contig040586-ZebTAR.A001  | contig040586-ZebTAR.A002  | 0.064 | 0.115 | 0.553 |
| contig034854-BurTARs.A027 | contig066691-ZebTARs.A015 | 0.288 | 0.520 | 0.553 |
| contig061977-BurTARs.A012 | contig056020-BurTARs.A021 | 0.286 | 0.517 | 0.553 |
| contig022383-TiITARs.A054 | contig022390-TiITARs.A056 | 0.102 | 0.184 | 0.553 |
| contig046011-NyeTARs.A016 | contig045088-TiITARs.A057 | 0.427 | 0.772 | 0.554 |
| contig062677-ZebTARs.A018 | contig030440-ZebTARs.A029 | 0.168 | 0.303 | 0.554 |
| contig086351-BriTARs.A021 | contig022334-TiITARs.A029 | 0.423 | 0.763 | 0.554 |
| contig038663-NyeTAR.A005  | contig040586-ZebTAR.A002  | 0.064 | 0.115 | 0.554 |
| contig022368-TiITARs.A046 | contig022382-TiITARs.A053 | 0.274 | 0.494 | 0.554 |
| contig056023-BurTARs.A019 | contig060292-NyeTARs.A027 | 0.449 | 0.810 | 0.554 |
| contig086351-BriTARs.A021 | contig022377-TiITARs.A050 | 0.429 | 0.775 | 0.554 |
| contig056023-BurTARs.A019 | contig022337-TiITARs.A031 | 0.205 | 0.370 | 0.554 |
| contig066890-ZebTARs.A014 | contig062677-ZebTARs.A018 | 0.193 | 0.348 | 0.555 |
| contig049540-BurTARs.A024 | contig045999-NyeTARs.A026 | 0.329 | 0.593 | 0.555 |
| contig086351-BriTARs.A021 | contig022320-TiITARs.A059 | 0.419 | 0.755 | 0.555 |
| contig060292-NyeTARs.A027 | contig022320-TiITARs.A059 | 0.412 | 0.743 | 0.555 |
| contig045999-NyeTARs.A026 | contig060292-NyeTARs.A027 | 0.444 | 0.799 | 0.555 |
| contig060292-NyeTARs.A027 | contig062677-ZebTARs.A018 | 0.369 | 0.664 | 0.555 |
| contig022324-TiITARs.A027 | contig030440-ZebTARs.A029 | 0.294 | 0.529 | 0.555 |
| contig049540-BurTARs.A024 | contig034854-BurTARs.A027 | 0.181 | 0.327 | 0.555 |
| contig084880-BriTARs.A016 | contig046011-NyeTARs.A016 | 0.310 | 0.558 | 0.555 |
| contig034854-BurTARs.A027 | contig030471-ZebTARs.A024 | 0.284 | 0.511 | 0.555 |
| contig046013-NyeTARs.A021 | contig022390-TiITARs.A056 | 0.288 | 0.518 | 0.556 |
| contig046013-NyeTARs.A021 | contig022382-TiITARs.A053 | 0.294 | 0.528 | 0.556 |
| contig046011-NyeTARs.A016 | contig022363-TiITARs.A043 | 0.258 | 0.464 | 0.556 |
| contig062039-NyeTARs.A022 | contig022363-TiITARs.A043 | 0.275 | 0.495 | 0.556 |
| contig035377-NyeTARs.A023 | contig030445-ZebTARs.A026 | 0.121 | 0.218 | 0.556 |
| contig084868-BriTARs.A014 | contig035375-NyeTARs.A013 | 0.150 | 0.270 | 0.557 |
| contig086351-BriTARs.A021 | contig046013-NyeTARs.A021 | 0.423 | 0.760 | 0.557 |
| contig084876-BriTARs.A015 | contig046011-NyeTARs.A016 | 0.311 | 0.559 | 0.557 |
| contig035375-NyeTARs.A013 | contig046011-NyeTARs.A016 | 0.314 | 0.563 | 0.557 |
| contig056023-BurTARs.A019 | contig022324-TiITARs.A027 | 0.111 | 0.199 | 0.557 |
| contig057305-BurTARs.A031 | contig060292-NyeTARs.A027 | 0.004 | 0.008 | 0.558 |
| contig022355-TiITARs.A039 | contig022357-TiITARs.A041 | 0.152 | 0.273 | 0.558 |
| contig045999-NyeTARs.A026 | contig066890-ZebTARs.A014 | 0.302 | 0.541 | 0.558 |
| contig046011-NyeTARs.A016 | contig030440-ZebTARs.A029 | 0.311 | 0.557 | 0.558 |
| contig086351-BriTARs.A021 | contig056200-NyeTARs.A029 | 0.381 | 0.682 | 0.558 |
| contig061433-BurTARs.A013 | contig045999-NyeTARs.A026 | 0.107 | 0.191 | 0.558 |
| contig022349-TiITARs.A035 | contig066285-ZebTARs.A016 | 0.196 | 0.352 | 0.558 |
| contig022365-TiITARs.A045 | contig022368-TiITARs.A047 | 0.078 | 0.139 | 0.559 |
| contig086351-BriTARs.A021 | contig056021-BurTARs.A020 | 0.419 | 0.749 | 0.559 |
| contig035381-NyeTARs.A015 | contig035377-NyeTARs.A023 | 0.124 | 0.223 | 0.559 |
| contig084876-BriTARs.A015 | contig045088-TiITARs.A057 | 0.362 | 0.648 | 0.559 |
| contig060292-NyeTARs.A027 | contig022382-TiITARs.A053 | 0.358 | 0.641 | 0.559 |
| contig049540-BurTARs.A024 | contig060292-NyeTARs.A027 | 0.371 | 0.664 | 0.559 |
| contig084887-BriTARs.A018 | contig046011-NyeTARs.A016 | 0.243 | 0.435 | 0.559 |
| contig046013-NyeTARs.A021 | contig030445-ZebTARs.A026 | 0.279 | 0.498 | 0.559 |
| contig035376-NyeTARs.A014 | contig046013-NyeTARs.A021 | 0.282 | 0.504 | 0.559 |
| contig035375-NyeTARs.A013 | contig022324-TiITARs.A027 | 0.299 | 0.534 | 0.559 |
| contig084876-BriTARs.A015 | contig056023-BurTARs.A019 | 0.292 | 0.522 | 0.559 |
| contig084880-BriTARs.A016 | contig082565-BriTARs.A022 | 0.302 | 0.540 | 0.559 |

|                           |                           |       |       |       |
|---------------------------|---------------------------|-------|-------|-------|
| contig084880-BriTARs.A016 | contig022362-TiITARs.A042 | 0.211 | 0.376 | 0.560 |
| contig057305-BurTARs.A031 | contig022390-TiITARs.A056 | 0.365 | 0.651 | 0.560 |
| contig057301-BurTARs.A017 | contig022379-TiITARs.A052 | 0.362 | 0.646 | 0.560 |
| contig062039-NyeTARs.A022 | contig022353-TiITARs.A036 | 0.289 | 0.516 | 0.560 |
| contig084887-BriTARs.A018 | contig030440-ZebTARs.A029 | 0.282 | 0.503 | 0.560 |
| contig045999-NyeTARs.A026 | contig030445-ZebTARs.A026 | 0.297 | 0.529 | 0.561 |
| contig061433-BurTARs.A013 | contig046011-NyeTARs.A016 | 0.285 | 0.509 | 0.561 |
| contig049534-BurTARs.A025 | contig046011-NyeTARs.A016 | 0.277 | 0.494 | 0.561 |
| contig034854-BurTARs.A027 | contig056200-NyeTARs.A029 | 0.183 | 0.327 | 0.561 |
| contig057305-BurTARs.A031 | contig062677-ZebTARs.A018 | 0.370 | 0.660 | 0.561 |
| contig086351-BriTARs.A021 | contig022390-TiITARs.A056 | 0.378 | 0.673 | 0.561 |
| contig059673-BurTARs.A016 | contig046013-NyeTARs.A021 | 0.380 | 0.678 | 0.561 |
| contig034854-BurTARs.A027 | contig022365-TiITARs.A045 | 0.294 | 0.524 | 0.561 |
| contig042499-NyeTARs.A028 | contig022379-TiITARs.A052 | 0.356 | 0.634 | 0.562 |
| contig086351-BriTARs.A021 | contig022382-TiITARs.A053 | 0.370 | 0.658 | 0.562 |
| contig061433-BurTARs.A013 | contig030440-ZebTARs.A029 | 0.295 | 0.524 | 0.562 |
| contig046010-NyeTARs.A019 | contig030464-ZebTARs.A025 | 0.004 | 0.008 | 0.562 |
| contig022390-TiITARs.A056 | contig061410-ZebTARs.A021 | 0.157 | 0.279 | 0.562 |
| contig056023-BurTARs.A019 | contig022362-TiITARs.A042 | 0.211 | 0.375 | 0.562 |
| contig060292-NyeTARs.A027 | contig066890-ZebTARs.A014 | 0.362 | 0.644 | 0.562 |
| contig056023-BurTARs.A019 | contig022334-TiITARs.A029 | 0.191 | 0.340 | 0.563 |
| contig022343-TiITARs.A033 | contig022362-TiITARs.A042 | 0.167 | 0.297 | 0.563 |
| contig057305-BurTARs.A031 | contig022320-TiITARs.A059 | 0.412 | 0.733 | 0.563 |
| contig061091-BurTARs.A014 | contig030440-ZebTARs.A029 | 0.287 | 0.510 | 0.563 |
| contig084876-BriTARs.A015 | contig056020-BurTARs.A021 | 0.297 | 0.527 | 0.563 |
| contig055697-BurTARs.A022 | contig007512-TiITARs.A024 | 0.020 | 0.035 | 0.563 |
| contig056023-BurTARs.A019 | contig066691-ZebTARs.A015 | 0.199 | 0.354 | 0.563 |
| contig035376-NyeTARs.A014 | contig045999-NyeTARs.A026 | 0.301 | 0.535 | 0.563 |
| contig022362-TiITARs.A042 | contig022363-TiITARs.A043 | 0.098 | 0.173 | 0.564 |
| contig046011-NyeTARs.A016 | contig022334-TiITARs.A029 | 0.244 | 0.433 | 0.564 |
| contig046011-NyeTARs.A016 | contig062039-NyeTARs.A022 | 0.323 | 0.573 | 0.564 |
| contig034854-BurTARs.A027 | contig022368-TiITARs.A047 | 0.303 | 0.537 | 0.564 |
| contig022378-TiITARs.A051 | contig066691-ZebTARs.A015 | 0.283 | 0.501 | 0.564 |
| contig035375-NyeTARs.A013 | contig035376-NyeTARs.A014 | 0.082 | 0.146 | 0.564 |
| contig057305-BurTARs.A031 | contig022382-TiITARs.A053 | 0.359 | 0.636 | 0.565 |
| contig049540-BurTARs.A024 | contig057305-BurTARs.A031 | 0.372 | 0.659 | 0.565 |
| contig056023-BurTARs.A019 | contig022343-TiITARs.A033 | 0.196 | 0.347 | 0.565 |
| contig022379-TiITARs.A052 | contig045088-TiITARs.A057 | 0.359 | 0.636 | 0.565 |
| contig056200-NyeTARs.A029 | contig022368-TiITARs.A046 | 0.282 | 0.500 | 0.565 |
| contig056023-BurTARs.A019 | contig046013-NyeTARs.A021 | 0.202 | 0.357 | 0.566 |
| contig035376-NyeTARs.A014 | contig022382-TiITARs.A053 | 0.153 | 0.271 | 0.566 |
| contig046011-NyeTARs.A016 | contig022390-TiITARs.A056 | 0.326 | 0.576 | 0.566 |
| contig084876-BriTARs.A015 | contig022390-TiITARs.A056 | 0.164 | 0.289 | 0.566 |
| contig045999-NyeTARs.A026 | contig056200-NyeTARs.A029 | 0.331 | 0.585 | 0.566 |
| contig062676-ZebTARs.A019 | contig030440-ZebTARs.A029 | 0.124 | 0.219 | 0.566 |
| contig054630-BurTARs.A023 | contig059768-ZebTARs.A022 | 0.004 | 0.007 | 0.566 |
| contig041024-BurTARs.A026 | contig035375-NyeTARs.A013 | 0.267 | 0.471 | 0.567 |
| contig022390-TiITARs.A056 | contig062677-ZebTARs.A018 | 0.180 | 0.318 | 0.567 |
| contig086351-BriTARs.A021 | contig056023-BurTARs.A019 | 0.456 | 0.803 | 0.568 |
| contig022368-TiITARs.A046 | contig030440-ZebTARs.A029 | 0.283 | 0.498 | 0.568 |
| contig049540-BurTARs.A024 | contig030440-ZebTARs.A029 | 0.166 | 0.292 | 0.569 |
| contig035375-NyeTARs.A013 | contig062676-ZebTARs.A019 | 0.127 | 0.222 | 0.569 |
| contig086351-BriTARs.A021 | contig045999-NyeTARs.A026 | 0.451 | 0.792 | 0.569 |

|                           |                           |       |       |       |
|---------------------------|---------------------------|-------|-------|-------|
| contig022363-TiITARs.A044 | contig062677-ZebTARs.A018 | 0.268 | 0.470 | 0.569 |
| contig060292-NyeTARs.A027 | contig061417-ZebTARs.A020 | 0.417 | 0.733 | 0.569 |
| contig022343-TiITARs.A033 | contig022353-TiITARs.A036 | 0.117 | 0.206 | 0.569 |
| contig042499-NyeTARs.A028 | contig022390-TiITARs.A056 | 0.384 | 0.673 | 0.570 |
| contig022353-TiITARs.A036 | contig022378-TiITARs.A051 | 0.260 | 0.456 | 0.570 |
| contig061091-BurTARs.A014 | contig034854-BurTARs.A027 | 0.284 | 0.498 | 0.570 |
| contig046011-NyeTARs.A016 | contig066691-ZebTARs.A015 | 0.248 | 0.435 | 0.570 |
| contig046013-NyeTARs.A021 | contig062039-NyeTARs.A022 | 0.280 | 0.492 | 0.571 |
| contig066890-ZebTARs.A014 | contig062676-ZebTARs.A019 | 0.108 | 0.190 | 0.571 |
| contig022349-TiITARs.A035 | contig022362-TiITARs.A042 | 0.180 | 0.315 | 0.571 |
| contig060292-NyeTARs.A027 | contig056200-NyeTARs.A029 | 0.369 | 0.646 | 0.571 |
| contig060292-NyeTARs.A027 | contig022390-TiITARs.A056 | 0.367 | 0.642 | 0.571 |
| contig022337-TiITARs.A031 | contig022353-TiITARs.A036 | 0.134 | 0.235 | 0.572 |
| contig035375-NyeTARs.A013 | contig066691-ZebTARs.A015 | 0.297 | 0.519 | 0.572 |
| contig046011-NyeTARs.A016 | contig022353-TiITARs.A036 | 0.240 | 0.419 | 0.572 |
| contig057301-BurTARs.A017 | contig022390-TiITARs.A056 | 0.387 | 0.677 | 0.572 |
| contig084887-BriTARs.A018 | contig022379-TiITARs.A052 | 0.263 | 0.459 | 0.573 |
| contig046011-NyeTARs.A016 | contig022330-TiITARs.A028 | 0.240 | 0.419 | 0.573 |
| contig061091-BurTARs.A014 | contig056023-BurTARs.A019 | 0.196 | 0.342 | 0.573 |
| contig061433-BurTARs.A013 | contig056023-BurTARs.A019 | 0.107 | 0.187 | 0.573 |
| contig034854-BurTARs.A027 | contig046007-NyeTARs.A017 | 0.292 | 0.510 | 0.573 |
| contig056023-BurTARs.A019 | contig066890-ZebTARs.A014 | 0.299 | 0.522 | 0.573 |
| contig061091-BurTARs.A014 | contig046011-NyeTARs.A016 | 0.249 | 0.435 | 0.573 |
| contig049540-BurTARs.A024 | contig022363-TiITARs.A044 | 0.266 | 0.463 | 0.574 |
| contig086344-BriTARs.A020 | contig022363-TiITARs.A043 | 0.421 | 0.734 | 0.574 |
| contig049540-BurTARs.A024 | contig066890-ZebTARs.A014 | 0.193 | 0.336 | 0.574 |
| contig022355-TiITARs.A039 | contig022363-TiITARs.A043 | 0.174 | 0.303 | 0.574 |
| contig057301-BurTARs.A017 | contig035375-NyeTARs.A013 | 0.383 | 0.667 | 0.574 |
| contig056200-NyeTARs.A029 | contig030440-ZebTARs.A029 | 0.168 | 0.292 | 0.575 |
| contig049540-BurTARs.A024 | contig046011-NyeTARs.A016 | 0.323 | 0.562 | 0.575 |
| contig035375-NyeTARs.A013 | contig022363-TiITARs.A043 | 0.332 | 0.578 | 0.575 |
| contig035376-NyeTARs.A014 | contig046011-NyeTARs.A016 | 0.311 | 0.541 | 0.575 |
| contig035375-NyeTARs.A013 | contig045088-TiITARs.A057 | 0.383 | 0.665 | 0.575 |
| contig084876-BriTARs.A015 | contig046013-NyeTARs.A021 | 0.287 | 0.498 | 0.575 |
| contig046007-NyeTARs.A017 | contig022363-TiITARs.A043 | 0.190 | 0.331 | 0.575 |
| contig035375-NyeTARs.A013 | contig030471-ZebTARs.A024 | 0.289 | 0.502 | 0.576 |
| contig057301-BurTARs.A017 | contig046011-NyeTARs.A016 | 0.431 | 0.749 | 0.576 |
| contig022390-TiITARs.A055 | contig062676-ZebTARs.A019 | 0.140 | 0.243 | 0.576 |
| contig046011-NyeTARs.A016 | contig066890-ZebTARs.A014 | 0.328 | 0.569 | 0.576 |
| contig061433-BurTARs.A013 | contig035375-NyeTARs.A013 | 0.303 | 0.526 | 0.576 |
| contig022363-TiITARs.A044 | contig022382-TiITARs.A053 | 0.255 | 0.443 | 0.576 |
| contig086351-BriTARs.A021 | contig061433-BurTARs.A013 | 0.440 | 0.763 | 0.577 |
| contig057305-BurTARs.A031 | contig056200-NyeTARs.A029 | 0.370 | 0.641 | 0.577 |
| contig056023-BurTARs.A019 | contig030445-ZebTARs.A026 | 0.294 | 0.509 | 0.577 |
| contig057305-BurTARs.A031 | contig061417-ZebTARs.A020 | 0.417 | 0.723 | 0.577 |
| contig049540-BurTARs.A024 | contig022368-TiITARs.A046 | 0.280 | 0.486 | 0.577 |
| contig084868-BriTARs.A014 | contig035377-NyeTARs.A023 | 0.113 | 0.196 | 0.578 |
| contig057148-BurTARs.A028 | contig046011-NyeTARs.A016 | 0.264 | 0.458 | 0.578 |
| contig035375-NyeTARs.A013 | contig061410-ZebTARs.A021 | 0.145 | 0.251 | 0.578 |
| contig082565-BriTARs.A022 | contig045999-NyeTARs.A026 | 0.305 | 0.528 | 0.578 |
| contig029633-BriTAR.A003  | contig038663-NyeTAR.A005  | 0.071 | 0.123 | 0.578 |
| contig046011-NyeTARs.A016 | contig062677-ZebTARs.A018 | 0.325 | 0.562 | 0.578 |
| contig084868-BriTARs.A014 | contig066890-ZebTARs.A014 | 0.128 | 0.221 | 0.579 |



|                           |                           |       |       |       |
|---------------------------|---------------------------|-------|-------|-------|
| contig035375-NyeTARs.A013 | contig035377-NyeTARs.A023 | 0.149 | 0.257 | 0.579 |
| contig084868-BriTARs.A014 | contig022390-TiITARs.A056 | 0.119 | 0.206 | 0.579 |
| contig084880-BriTARs.A016 | contig022382-TiITARs.A053 | 0.325 | 0.560 | 0.579 |
| contig056200-NyeTARs.A029 | contig066890-ZebTARs.A014 | 0.195 | 0.336 | 0.579 |
| contig056023-BurTARs.A019 | contig035376-NyeTARs.A014 | 0.299 | 0.515 | 0.580 |
| contig034854-BurTARs.A027 | contig022324-TiITARs.A027 | 0.303 | 0.523 | 0.580 |
| contig056200-NyeTARs.A029 | contig022363-TiITARs.A044 | 0.267 | 0.460 | 0.580 |
| contig022379-TiITARs.A052 | contig022390-TiITARs.A056 | 0.160 | 0.275 | 0.581 |
| contig084887-BriTARs.A018 | contig034854-BurTARs.A027 | 0.288 | 0.496 | 0.581 |
| contig046013-NyeTARs.A021 | contig022334-TiITARs.A030 | 0.190 | 0.328 | 0.581 |
| contig035375-NyeTARs.A013 | contig022368-TiITARs.A046 | 0.288 | 0.496 | 0.581 |
| contig035375-NyeTARs.A013 | contig046007-NyeTARs.A017 | 0.298 | 0.513 | 0.581 |
| contig086351-BriTARs.A021 | contig061417-ZebTARs.A020 | 0.422 | 0.725 | 0.581 |
| contig056023-BurTARs.A019 | contig022382-TiITARs.A053 | 0.318 | 0.546 | 0.582 |
| contig061433-BurTARs.A013 | contig045088-TiITARs.A057 | 0.398 | 0.683 | 0.582 |
| contig035375-NyeTARs.A013 | contig022382-TiITARs.A053 | 0.159 | 0.272 | 0.582 |
| contig046011-NyeTARs.A016 | contig046013-NyeTARs.A021 | 0.247 | 0.424 | 0.583 |
| contig084868-BriTARs.A014 | contig030440-ZebTARs.A029 | 0.150 | 0.257 | 0.584 |
| contig046011-NyeTARs.A016 | contig030464-ZebTARs.A025 | 0.267 | 0.458 | 0.584 |
| contig034854-BurTARs.A027 | contig022368-TiITARs.A046 | 0.285 | 0.489 | 0.584 |
| contig061433-BurTARs.A013 | contig057305-BurTARs.A031 | 0.444 | 0.759 | 0.584 |
| contig035375-NyeTARs.A013 | contig042499-NyeTARs.A028 | 0.377 | 0.644 | 0.585 |
| contig045999-NyeTARs.A026 | contig042499-NyeTARs.A028 | 0.419 | 0.715 | 0.586 |
| contig056020-BurTARs.A021 | contig022363-TiITARs.A043 | 0.182 | 0.311 | 0.586 |
| contig046011-NyeTARs.A016 | contig022378-TiITARs.A051 | 0.314 | 0.536 | 0.586 |
| contig084876-BriTARs.A015 | contig035375-NyeTARs.A013 | 0.155 | 0.264 | 0.586 |
| contig056023-BurTARs.A019 | contig046011-NyeTARs.A016 | 0.314 | 0.536 | 0.586 |
| contig084880-BriTARs.A016 | contig042499-NyeTARs.A028 | 0.416 | 0.708 | 0.587 |
| contig061433-BurTARs.A013 | contig042499-NyeTARs.A028 | 0.392 | 0.668 | 0.587 |
| contig022390-TiITARs.A056 | contig062676-ZebTARs.A019 | 0.099 | 0.169 | 0.587 |
| contig049540-BurTARs.A024 | contig022390-TiITARs.A056 | 0.181 | 0.307 | 0.588 |
| contig035375-NyeTARs.A013 | contig046014-NyeTARs.A024 | 0.272 | 0.462 | 0.588 |
| contig029633-BriTAR.A003  | contig039639-TiITAR.A001  | 0.057 | 0.096 | 0.589 |
| contig022390-TiITARs.A055 | contig062677-ZebTARs.A018 | 0.191 | 0.324 | 0.590 |
| contig034854-BurTARs.A027 | contig062676-ZebTARs.A019 | 0.146 | 0.248 | 0.590 |
| contig034854-BurTARs.A027 | contig035377-NyeTARs.A023 | 0.155 | 0.263 | 0.590 |
| contig029633-BriTAR.A003  | contig040586-ZebTAR.A001  | 0.073 | 0.123 | 0.590 |
| contig061091-BurTARs.A014 | contig022378-TiITARs.A051 | 0.279 | 0.471 | 0.591 |
| contig046013-NyeTARs.A021 | contig022379-TiITARs.A052 | 0.274 | 0.464 | 0.591 |
| contig084880-BriTARs.A016 | contig084887-BriTARs.A018 | 0.222 | 0.376 | 0.592 |
| contig061433-BurTARs.A013 | contig060292-NyeTARs.A027 | 0.444 | 0.749 | 0.592 |
| contig035376-NyeTARs.A014 | contig035381-NyeTARs.A015 | 0.025 | 0.042 | 0.593 |
| contig056200-NyeTARs.A029 | contig022390-TiITARs.A056 | 0.182 | 0.307 | 0.593 |
| contig046013-NyeTARs.A021 | contig030440-ZebTARs.A029 | 0.290 | 0.489 | 0.594 |
| contig035375-NyeTARs.A013 | contig022320-TiITARs.A059 | 0.270 | 0.455 | 0.594 |
| contig046011-NyeTARs.A016 | contig022382-TiITARs.A053 | 0.315 | 0.531 | 0.594 |
| contig022378-TiITARs.A051 | contig030471-ZebTARs.A024 | 0.278 | 0.468 | 0.594 |
| contig045999-NyeTARs.A026 | contig045088-TiITARs.A057 | 0.426 | 0.716 | 0.594 |
| contig082565-BriTARs.A022 | contig035377-NyeTARs.A023 | 0.121 | 0.204 | 0.595 |
| contig082565-BriTARs.A022 | contig056023-BurTARs.A019 | 0.303 | 0.509 | 0.595 |
| contig062039-NyeTARs.A022 | contig022378-TiITARs.A051 | 0.028 | 0.047 | 0.595 |
| contig046011-NyeTARs.A016 | contig022379-TiITARs.A052 | 0.306 | 0.514 | 0.595 |
| contig086351-BriTARs.A021 | contig046011-NyeTARs.A016 | 0.475 | 0.797 | 0.596 |

|                           |                           |       |       |       |
|---------------------------|---------------------------|-------|-------|-------|
| contig084880-BriTARs.A016 | contig045088-TiITARs.A057 | 0.423 | 0.709 | 0.596 |
| contig034854-BurTARs.A027 | contig022382-TiITARs.A053 | 0.172 | 0.289 | 0.596 |
| contig035376-NyeTARs.A014 | contig030445-ZebTARs.A026 | 0.021 | 0.035 | 0.596 |
| contig046011-NyeTARs.A016 | contig056200-NyeTARs.A029 | 0.325 | 0.546 | 0.596 |
| contig061433-BurTARs.A013 | contig034854-BurTARs.A027 | 0.312 | 0.522 | 0.597 |
| contig084887-BriTARs.A018 | contig035375-NyeTARs.A013 | 0.292 | 0.490 | 0.597 |
| contig035377-NyeTARs.A023 | contig062676-ZebTARs.A019 | 0.094 | 0.157 | 0.597 |
| contig046011-NyeTARs.A016 | contig046010-NyeTARs.A019 | 0.265 | 0.444 | 0.597 |
| contig061091-BurTARs.A014 | contig035375-NyeTARs.A013 | 0.297 | 0.496 | 0.598 |
| contig084868-BriTARs.A014 | contig082565-BriTARs.A022 | 0.123 | 0.205 | 0.599 |
| contig084880-BriTARs.A016 | contig030440-ZebTARs.A029 | 0.307 | 0.512 | 0.599 |
| contig061433-BurTARs.A013 | contig057301-BurTARs.A017 | 0.395 | 0.658 | 0.600 |
| contig035377-NyeTARs.A023 | contig030440-ZebTARs.A029 | 0.146 | 0.244 | 0.601 |
| contig034854-BurTARs.A027 | contig046013-NyeTARs.A021 | 0.291 | 0.484 | 0.602 |
| contig022390-TiITARs.A055 | contig066890-ZebTARs.A014 | 0.086 | 0.142 | 0.603 |
| contig046011-NyeTARs.A016 | contig022343-TiITARs.A033 | 0.257 | 0.426 | 0.603 |
| contig022382-TiITARs.A053 | contig022390-TiITARs.A055 | 0.186 | 0.308 | 0.603 |
| contig049540-BurTARs.A024 | contig022390-TiITARs.A055 | 0.186 | 0.308 | 0.603 |
| contig056200-NyeTARs.A029 | contig022390-TiITARs.A055 | 0.186 | 0.308 | 0.603 |
| contig084880-BriTARs.A016 | contig057301-BurTARs.A017 | 0.421 | 0.698 | 0.603 |
| contig041024-BurTARs.A026 | contig030471-ZebTARs.A024 | 0.053 | 0.088 | 0.605 |
| contig045999-NyeTARs.A026 | contig022353-TiITARs.A036 | 0.204 | 0.338 | 0.605 |
| contig046011-NyeTARs.A016 | contig022377-TiITARs.A050 | 0.275 | 0.454 | 0.605 |
| contig056023-BurTARs.A019 | contig042499-NyeTARs.A028 | 0.421 | 0.695 | 0.606 |
| contig045999-NyeTARs.A026 | contig030440-ZebTARs.A029 | 0.305 | 0.503 | 0.606 |
| contig035375-NyeTARs.A013 | contig022353-TiITARs.A036 | 0.309 | 0.509 | 0.607 |
| contig045999-NyeTARs.A026 | contig022382-TiITARs.A053 | 0.325 | 0.535 | 0.607 |
| contig022379-TiITARs.A052 | contig022390-TiITARs.A055 | 0.108 | 0.177 | 0.608 |
| contig034854-BurTARs.A027 | contig022383-TiITARs.A054 | 0.147 | 0.241 | 0.609 |
| contig046011-NyeTARs.A016 | contig022337-TiITARs.A031 | 0.263 | 0.431 | 0.611 |
| contig035376-NyeTARs.A014 | contig035377-NyeTARs.A023 | 0.127 | 0.207 | 0.612 |
| contig084880-BriTARs.A016 | contig022353-TiITARs.A036 | 0.204 | 0.333 | 0.613 |
| contig046011-NyeTARs.A016 | contig035377-NyeTARs.A023 | 0.325 | 0.530 | 0.613 |
| contig022382-TiITARs.A053 | contig030440-ZebTARs.A029 | 0.157 | 0.256 | 0.613 |
| contig022382-TiITARs.A053 | contig066890-ZebTARs.A014 | 0.184 | 0.300 | 0.614 |
| contig084886-BriTARs.A017 | contig030464-ZebTARs.A025 | 0.026 | 0.042 | 0.614 |
| contig056023-BurTARs.A019 | contig045088-TiITARs.A057 | 0.428 | 0.696 | 0.615 |
| contig022363-TiITARs.A043 | contig022378-TiITARs.A051 | 0.268 | 0.436 | 0.615 |
| contig086351-BriTARs.A021 | contig060292-NyeTARs.A027 | 0.022 | 0.035 | 0.616 |
| contig046013-NyeTARs.A021 | contig022378-TiITARs.A051 | 0.281 | 0.455 | 0.617 |
| contig046011-NyeTARs.A016 | contig022354-TiITARs.A037 | 0.076 | 0.122 | 0.619 |
| contig056023-BurTARs.A019 | contig030440-ZebTARs.A029 | 0.307 | 0.495 | 0.620 |
| contig057301-BurTARs.A017 | contig045999-NyeTARs.A026 | 0.441 | 0.711 | 0.620 |
| contig039639-TiITAR.A001  | contig039640-TiITAR.A002  | 0.047 | 0.076 | 0.620 |
| contig084876-BriTARs.A015 | contig084887-BriTARs.A018 | 0.309 | 0.498 | 0.621 |
| contig035375-NyeTARs.A013 | contig066890-ZebTARs.A014 | 0.151 | 0.242 | 0.621 |
| contig035375-NyeTARs.A013 | contig046013-NyeTARs.A021 | 0.301 | 0.483 | 0.622 |
| contig046011-NyeTARs.A016 | contig022363-TiITARs.A044 | 0.210 | 0.337 | 0.623 |
| contig057305-BurTARs.A031 | contig022390-TiITARs.A055 | 0.431 | 0.691 | 0.624 |
| contig034854-BurTARs.A027 | contig066890-ZebTARs.A014 | 0.155 | 0.248 | 0.625 |
| contig059673-BurTARs.A016 | contig022390-TiITARs.A055 | 0.512 | 0.815 | 0.628 |
| contig084880-BriTARs.A016 | contig035375-NyeTARs.A013 | 0.313 | 0.498 | 0.629 |
| contig022382-TiITARs.A053 | contig022390-TiITARs.A056 | 0.171 | 0.271 | 0.630 |

|                           |                           |       |       |       |
|---------------------------|---------------------------|-------|-------|-------|
| contig034854-BurTARs.A027 | contig030440-ZebTARs.A029 | 0.051 | 0.080 | 0.632 |
| contig056023-BurTARs.A019 | contig022353-TiITARs.A036 | 0.206 | 0.326 | 0.632 |
| contig084868-BriTARs.A014 | contig022390-TiITARs.A055 | 0.214 | 0.339 | 0.633 |
| contig062039-NyeTARs.A022 | contig022390-TiITARs.A055 | 0.386 | 0.609 | 0.633 |
| contig022390-TiITARs.A056 | contig030440-ZebTARs.A029 | 0.140 | 0.222 | 0.633 |
| contig084880-BriTARs.A016 | contig034854-BurTARs.A027 | 0.327 | 0.515 | 0.635 |
| contig035375-NyeTARs.A013 | contig022390-TiITARs.A056 | 0.143 | 0.225 | 0.635 |
| contig035375-NyeTARs.A013 | contig045999-NyeTARs.A026 | 0.311 | 0.489 | 0.637 |
| contig022390-TiITARs.A055 | contig059768-ZebTARs.A022 | 0.377 | 0.593 | 0.637 |
| contig084868-BriTARs.A014 | contig034854-BurTARs.A027 | 0.157 | 0.245 | 0.639 |
| contig057301-BurTARs.A017 | contig056023-BurTARs.A019 | 0.443 | 0.691 | 0.641 |
| contig034854-BurTARs.A027 | contig045999-NyeTARs.A026 | 0.325 | 0.506 | 0.643 |
| contig046011-NyeTARs.A016 | contig022334-TiITARs.A030 | 0.237 | 0.369 | 0.643 |
| contig056023-BurTARs.A019 | contig035375-NyeTARs.A013 | 0.312 | 0.485 | 0.644 |
| contig066890-ZebTARs.A014 | contig030440-ZebTARs.A029 | 0.148 | 0.229 | 0.646 |
| contig061977-BurTARs.A012 | contig022390-TiITARs.A055 | 0.105 | 0.161 | 0.649 |
| contig034854-BurTARs.A027 | contig022353-TiITARs.A036 | 0.309 | 0.474 | 0.652 |
| contig035381-NyeTARs.A015 | contig022390-TiITARs.A056 | 0.117 | 0.179 | 0.652 |
| contig039640-TiITAR.A002  | contig040586-ZebTAR.A002  | 0.053 | 0.081 | 0.655 |
| contig035381-NyeTARs.A015 | contig066890-ZebTARs.A014 | 0.123 | 0.188 | 0.655 |
| contig056023-BurTARs.A019 | contig034854-BurTARs.A027 | 0.327 | 0.499 | 0.657 |
| contig086351-BriTARs.A021 | contig057305-BurTARs.A031 | 0.023 | 0.035 | 0.657 |
| contig054630-BurTARs.A023 | contig022390-TiITARs.A055 | 0.390 | 0.593 | 0.658 |
| contig034854-BurTARs.A027 | contig022390-TiITARs.A056 | 0.153 | 0.231 | 0.661 |
| contig082565-BriTARs.A022 | contig022390-TiITARs.A056 | 0.114 | 0.170 | 0.667 |
| contig029633-BriTAR.A003  | contig039640-TiITAR.A002  | 0.057 | 0.086 | 0.668 |
| contig084886-BriTARs.A017 | contig046011-NyeTARs.A016 | 0.280 | 0.419 | 0.669 |
| contig039640-TiITAR.A003  | contig040586-ZebTAR.A002  | 0.057 | 0.083 | 0.680 |
| contig060292-NyeTARs.A027 | contig022390-TiITARs.A055 | 0.432 | 0.635 | 0.681 |
| contig086337-BriTARs.A019 | contig007512-TiITARs.A024 | 0.024 | 0.035 | 0.683 |
| contig007512-TiITARs.A024 | contig053139-ZebTARs.A023 | 0.021 | 0.031 | 0.684 |
| contig022390-TiITARs.A056 | contig030445-ZebTARs.A026 | 0.114 | 0.166 | 0.686 |
| contig066890-ZebTARs.A014 | contig030445-ZebTARs.A026 | 0.120 | 0.175 | 0.688 |
| contig022334-TiITARs.A030 | contig022363-TiITARs.A043 | 0.293 | 0.425 | 0.690 |
| contig086351-BriTARs.A021 | contig022390-TiITARs.A055 | 0.425 | 0.611 | 0.695 |
| contig035376-NyeTARs.A014 | contig022390-TiITARs.A056 | 0.120 | 0.171 | 0.701 |
| contig022390-TiITARs.A055 | contig061410-ZebTARs.A021 | 0.112 | 0.158 | 0.708 |
| contig084876-BriTARs.A015 | contig022390-TiITARs.A055 | 0.108 | 0.152 | 0.713 |
| contig082565-BriTARs.A022 | contig066890-ZebTARs.A014 | 0.121 | 0.168 | 0.720 |
| contig039639-TiITAR.A001  | contig039642-TiITAR.A004  | 0.036 | 0.050 | 0.722 |
| contig035381-NyeTARs.A015 | contig030445-ZebTARs.A026 | 0.016 | 0.022 | 0.724 |
| contig084876-BriTARs.A015 | contig061410-ZebTARs.A021 | 0.016 | 0.022 | 0.732 |
| contig084887-BriTARs.A018 | contig066691-ZebTARs.A015 | 0.016 | 0.022 | 0.739 |
| contig084887-BriTARs.A018 | contig061091-BurTARs.A014 | 0.016 | 0.022 | 0.740 |
| contig035376-NyeTARs.A014 | contig066890-ZebTARs.A014 | 0.127 | 0.171 | 0.740 |
| contig056021-BurTARs.A020 | contig061417-ZebTARs.A020 | 0.014 | 0.019 | 0.745 |
| contig020038-BurTAR.A002  | contig003909-ZebTAR.A003  | 0.008 | 0.011 | 0.749 |
| contig059766-BurTARs.A029 | contig053145-ZebTARs.A028 | 0.003 | 0.004 | 0.760 |
| contig039639-TiITAR.A001  | contig039640-TiITAR.A003  | 0.049 | 0.064 | 0.762 |
| contig029633-BriTAR.A003  | contig039640-TiITAR.A003  | 0.070 | 0.092 | 0.764 |
| contig056020-BurTARs.A021 | contig046007-NyeTARs.A017 | 0.009 | 0.011 | 0.765 |
| contig034854-BurTARs.A027 | contig035375-NyeTARs.A013 | 0.052 | 0.067 | 0.774 |
| contig035375-NyeTARs.A013 | contig022390-TiITARs.A055 | 0.106 | 0.134 | 0.788 |

|                           |                           |       |       |       |
|---------------------------|---------------------------|-------|-------|-------|
| contig039640-TiITAR.A002  | contig039642-TiITAR.A004  | 0.047 | 0.060 | 0.797 |
| contig022378-TiITARs.A051 | contig022390-TiITARs.A055 | 0.404 | 0.505 | 0.800 |
| contig039640-TiITAR.A003  | contig039642-TiITAR.A004  | 0.050 | 0.062 | 0.801 |
| contig086337-BriTARs.A019 | contig053139-ZebTARs.A023 | 0.016 | 0.019 | 0.803 |
| contig022390-TiITARs.A055 | contig022390-TiITARs.A056 | 0.073 | 0.083 | 0.874 |
| contig025313-BriTAR.A002  | contig020038-BurTAR.A002  | 0.014 | 0.015 | 0.941 |
| contig038663-NyeTAR.A005  | contig040586-ZebTAR.A001  | 0.007 | 0.007 | 0.995 |
| contig057301-BurTARs.A017 | contig042499-NyeTARs.A028 | 0.008 | 0.008 | 1.108 |
| contig020038-BurTAR.A002  | contig032272-NyeTAR.A004  | 0.008 | 0.007 | 1.127 |
| contig057301-BurTARs.A017 | contig045088-TiITARs.A057 | 0.014 | 0.011 | 1.239 |
| contig022330-TiITARs.A028 | contig022334-TiITARs.A029 | 0.015 | 0.011 | 1.368 |
| contig042499-NyeTARs.A028 | contig045088-TiITARs.A057 | 0.022 | 0.011 | 1.987 |

| Fam B                    |                          |       |       |       |
|--------------------------|--------------------------|-------|-------|-------|
|                          |                          | dN    | dS    | dN/dS |
| contig037879-TiITAR.B060 | contig037900-TiITAR.B063 | 0.238 | 0.736 | 0.324 |
| contig037879-TiITAR.B060 | contig002574-TiITAR.B062 | 0.240 | 0.689 | 0.348 |
| contig035253-BriTAR.B025 | contig037879-TiITAR.B060 | 0.239 | 0.680 | 0.352 |
| contig006087-BurTAR.B032 | contig033536-ZebTAR.B029 | 0.004 | 0.012 | 0.353 |
| contig033536-ZebTAR.B029 | contig052987-NyeTAR.B030 | 0.001 | 0.004 | 0.354 |
| contig037879-TiITAR.B060 | contig037889-TiITAR.B061 | 0.238 | 0.646 | 0.369 |
| contig037889-TiITAR.B061 | contig037900-TiITAR.B063 | 0.255 | 0.668 | 0.382 |
| contig002574-TiITAR.B062 | contig037900-TiITAR.B063 | 0.270 | 0.692 | 0.390 |
| contig035253-BriTAR.B025 | contig037900-TiITAR.B063 | 0.281 | 0.704 | 0.399 |
| contig035253-BriTAR.B025 | contig037889-TiITAR.B061 | 0.034 | 0.071 | 0.484 |
| contig037879-TiITAR.B060 | contig033536-ZebTAR.B029 | 0.460 | 0.936 | 0.491 |
| contig006087-BurTAR.B032 | contig037879-TiITAR.B060 | 0.459 | 0.931 | 0.493 |
| contig037879-TiITAR.B060 | contig052987-NyeTAR.B030 | 0.459 | 0.931 | 0.493 |
| contig037900-TiITAR.B063 | contig033536-ZebTAR.B029 | 0.449 | 0.867 | 0.518 |
| contig035253-BriTAR.B025 | contig006087-BurTAR.B032 | 0.462 | 0.880 | 0.525 |
| contig037889-TiITAR.B061 | contig002574-TiITAR.B062 | 0.033 | 0.063 | 0.526 |
| contig035253-BriTAR.B025 | contig033536-ZebTAR.B029 | 0.464 | 0.878 | 0.528 |
| contig037900-TiITAR.B063 | contig052987-NyeTAR.B030 | 0.452 | 0.854 | 0.529 |
| contig035253-BriTAR.B025 | contig052987-NyeTAR.B030 | 0.463 | 0.873 | 0.531 |
| contig006087-BurTAR.B032 | contig002574-TiITAR.B062 | 0.465 | 0.868 | 0.535 |
| contig006087-BurTAR.B032 | contig037900-TiITAR.B063 | 0.460 | 0.856 | 0.537 |
| contig002574-TiITAR.B062 | contig033536-ZebTAR.B029 | 0.466 | 0.867 | 0.538 |
| contig002574-TiITAR.B062 | contig052987-NyeTAR.B030 | 0.466 | 0.862 | 0.541 |
| contig006087-BurTAR.B032 | contig037889-TiITAR.B061 | 0.448 | 0.799 | 0.561 |
| contig037889-TiITAR.B061 | contig052987-NyeTAR.B030 | 0.449 | 0.793 | 0.567 |
| contig037889-TiITAR.B061 | contig033536-ZebTAR.B029 | 0.450 | 0.794 | 0.567 |
| contig035253-BriTAR.B025 | contig002574-TiITAR.B062 | 0.020 | 0.012 | 1.640 |
| contig006087-BurTAR.B032 | contig052987-NyeTAR.B030 | 0.001 | 0.000 | >10   |
